# Supplementary material for: Identification and Comparative Analysis of Venom Proteins in a Pupal Ectoparasitoid, Pachycrepoideus vindemmiae
Source: Front Physiol. 2020 Jan 24;11:9. doi: 10.3389/fphys.2020.00009 (PMC6993573; doi:10.3389/fphys.2020.00009)
Supplement: TABLE S2 — 1706 unigenes identified by proteomic approach. [file Table_2.xlsx]

## Sheet: proteinGroups
Supplementary Table 2. 1706 unigenes identified by proteomic approach
Protein IDs	Proteins	Peptides	Unique peptides	Sequence coverage [%]	Mol. weight [kDa]	PEP	Intensity	iBAQ
>Cluster-10084.1;orf1 len=120 frame:-2 start:788 end:429 gi|189502784|gb|ACE06961.1| mitochondrial heat shock 60kD protein 1 variant 1 [Homo sapiens]	1	2	2	26.9	12.369	9.7744e-129	45657000	6522400
>Cluster-10084.1;orf2 len=499 frame:-1 start:2241 end:745 gi|189502784|gb|ACE06961.1| mitochondrial heat shock 60kD protein 1 variant 1 [Homo sapiens]	1	5	4	16.3	53.792	5.3626e-46	168790000	6492000
>Cluster-9846.9697;orf1 len=186 frame:3 start:51 end:608 gi|645030788|ref|XP_008214012.1| PREDICTED: 40S ribosomal protein S18 [Nasonia vitripennis];>Cluster-10106.0;orf1 len=170 frame:2 start:17 end:526 gi|156372342|ref|XP_001628997.1| predicted protein [Nematostella vectensis]>gi|156215987|gb|EDO36934.1| predicted protein [Nematostella vectensis];>Cluster-9846.20684;orf1 len=170 frame:2 start:2…	10	1	1	4.3	21.414	0.0026781	35325000	3532500
>Cluster-10162.0;orf2 len=184 frame:-2 start:593 end:42 gi|820970967|ref|XP_012358560.1| PREDICTED: 40S ribosomal protein S10 isoform X1 [Nomascus leucogenys];>Cluster-9846.21486;orf1 len=168 frame:3 start:3 end:506 gi|62087910|dbj|BAD92402.1| ribosomal protein S10 variant [Homo sapiens]	2	1	1	4.9	20.625	0.0069972	15260000	1695600
>Cluster-10248.3; len=85 start:1 end:253; minus strand	1	2	1	28.2	9.8637	3.3666e-06	54765000	10953000
>Cluster-10248.6; len=87 start:31 end:289; minus strand;>Cluster-10248.8; len=73 start:1 end:216; minus strand;>Cluster-10248.5; len=61 start:51 end:231; minus strand;>Cluster-13118.0;orf1 len=161 frame:2 start:2 end:484 gi|426334099|ref|XP_004028600.1| PREDICTED: histone H2B type 1-B-like [Gorilla gorilla gorilla];>Cluster-13123.0; len=142 start:66 end:491; minus strand;>Cluster-23236.0; len=141…	9	3	0	37.2	9.3477	4.2333e-09	139370000	23229000
>Cluster-10384.1; len=178 start:1 end:533; minus strand;>Cluster-9846.1621; len=154 start:1 end:461; minus strand	2	1	1	8.4	19.301	1.9284e-28	0	0
>Cluster-1042.0;orf1 len=210 frame:1 start:169 end:798 gi|322791132|gb|EFZ15694.1| hypothetical protein SINV_06554, partial [Solenopsis invicta]	1	7	7	38.3	23.99	9.023e-46	3353700000	279480000
>Cluster-10531.0;orf1 len=171 frame:1 start:1 end:513 gi|826279832|ref|XP_012494914.1| PREDICTED: transcription factor BTF3 homolog 4 isoform X1 [Propithecus coquereli]	1	1	1	7.1	18.678	0.0061086	0	0
>Cluster-10690.1;orf1 len=209 frame:-2 start:809 end:183 gi|478536767|ref|XP_004442502.1| PREDICTED: ras-related protein Rab-7a [Ceratotherium simum simum];>Cluster-15466.0;orf1 len=186 frame:2 start:2 end:559 gi|686612006|ref|XP_009282724.1| PREDICTED: ras-related protein Rab-7a isoform X1 [Aptenodytes forsteri]	2	2	2	14.4	23.646	1.8626e-16	14165000	1011800
>Cluster-10869.0;orf1 len=143 frame:-3 start:549 end:121 gi|694893876|ref|XP_009440597.1| PREDICTED: MORN repeat-containing protein 2 isoform X2 [Pan troglodytes]	1	1	1	7	15.939	0.011828	158610000	15861000
>Cluster-700.0;orf1 len=518 frame:2 start:2 end:1555 gi|21361547|ref|NP_002930.2| ribonuclease inhibitor [Homo sapiens]>gi|42794608|ref|NP_976318.1| ribonuclease inhibitor [Homo sapiens]>gi|42822864|ref|NP_976322.1| ribonuclease inhibitor [Homo sapiens]>gi|42822866|ref|NP_976323.1| ribonuclease inhibitor [Homo sapiens]>gi|42822868|ref|NP_976321.1| ribonuclease inhibitor [Homo sapiens]>gi|42822870…	4	2	2	4.8	55.819	6.337e-10	51084000	1824400
>Cluster-10995.2;orf1 len=676 frame:-2 start:2789 end:762 gi|645039868|ref|XP_008204896.1| PREDICTED: 4-coumarate--CoA ligase 1-like [Nasonia vitripennis];>Cluster-10995.3;orf1 len=648 frame:-2 start:2705 end:762 gi|645039868|ref|XP_008204896.1| PREDICTED: 4-coumarate--CoA ligase 1-like [Nasonia vitripennis];>Cluster-10995.1;orf1 len=629 frame:-2 start:2648 end:762 gi|645039868|ref|XP_008204896.1…	3	2	2	4	74.675	0.0012272	39908000	1140200
>Cluster-11098.0;orf1 len=68 frame:-1 start:206 end:3 gi|645021613|ref|XP_001601317.2| PREDICTED: uncharacterized protein LOC100116956 [Nasonia vitripennis]	1	1	1	29.4	7.6367	3.1985e-07	34689000	8672400
>Cluster-11140.0;orf1 len=166 frame:-1 start:722 end:225 gi|645022520|ref|XP_008217420.1| PREDICTED: venom protein J isoform X1 [Nasonia vitripennis]	1	2	2	17.6	17.243	5.3914e-39	2868700000	478120000
>Cluster-11241.0; len=734 start:113 end:2316; minus strand;>Cluster-11241.1; len=652 start:1 end:1960; minus strand;>Cluster-5295.0; len=395 start:1 end:1185; minus strand	3	3	3	4.6	81.317	7.7024e-10	40513000	988120
>Cluster-11606.1;orf2 len=553 frame:-3 start:1894 end:236 gi|2245365|gb|AAC51518.1| ER-60 protein [Homo sapiens];>Cluster-17324.0; len=401 start:236 end:1438; minus strand;>Cluster-11935.0; len=403 start:181 end:1389; minus strand	3	4	4	10.7	61.517	1.0249e-10	134510000	4076000
>Cluster-11645.0;orf1 len=290 frame:-1 start:872 end:3 gi|675390116|gb|KFM83013.1| V-type proton ATPase subunit B, partial [Stegodyphus mimosarum]	1	1	1	6.9	31.652	3.1218e-19	314640000	19665000
>Cluster-11657.0;orf1 len=75 frame:1 start:1 end:225 gi|662033848|ref|NP_001284495.1| cytochrome b-c1 complex subunit 6, mitochondrial isoform 3 precursor [Homo sapiens]>gi|686704366|ref|XP_009249124.1| PREDICTED: LOW QUALITY PROTEIN: cytochrome b-c1 complex subunit 6, mitochondrial [Pongo abelii]>gi|119627331|gb|EAX06926.1| ubiquinol-cytochrome c reductase hinge protein, isoform CRA_d [Homo sapi…	1	1	1	24.3	8.8476	6.643e-07	21633000	4326600
>Cluster-11678.2;orf1 len=476 frame:2 start:2 end:1429 gi|544186036|ref|NP_001269635.1| protein disulfide-isomerase A6 isoform c [Homo sapiens]	1	3	3	9.7	51.497	1.3126e-11	69954000	3681800
>Cluster-11764.0; len=192 start:396 end:969; minus strand;>Cluster-9846.16487;orf1 len=186 frame:-1 start:2278 end:1721 gi|565319319|gb|ETE70432.1| Calmodulin, partial [Ophiophagus hannah];>Cluster-12662.0;orf1 len=184 frame:-1 start:2273 end:1722 gi|744542371|ref|XP_010986526.1| PREDICTED: calmodulin [Camelus dromedarius];>Cluster-9846.18812;orf1 len=184 frame:-1 start:1271 end:720 gi|744542371|…	20	4	4	18.3	20.608	7.8691e-10	593530000	53957000
>Cluster-11826.0;orf1 len=417 frame:2 start:2 end:1252 gi|767957496|ref|XP_011517007.1| PREDICTED: argininosuccinate synthase isoform X2 [Homo sapiens]	1	1	1	3.1	46.942	0.0011845	9177700	417170
>Cluster-11900.0; len=432 start:120 end:1412; minus strand	1	2	1	8.6	47.557	4.5144e-13	73164000	3181000
>Cluster-11974.0;orf1 len=244 frame:2 start:2 end:733 gi|67782305|ref|NP_000627.2| superoxide dismutase [Mn], mitochondrial isoform A precursor [Homo sapiens]>gi|67782307|ref|NP_001019636.1| superoxide dismutase [Mn], mitochondrial isoform A precursor [Homo sapiens]>gi|15214595|gb|AAH12423.1| Superoxide dismutase 2, mitochondrial [Homo sapiens]>gi|30016937|gb|AAP03428.1| superoxide dismutase 2, m…	1	1	1	5.8	27.08	0.0093699	0	0
>Cluster-12023.1; len=132 start:59 end:453; minus strand	1	1	1	6.8	14.887	0.0074256	0	0
>Cluster-12150.0;orf1 len=328 frame:3 start:39 end:1022 gi|156553048|ref|XP_001605145.1| PREDICTED: ras suppressor protein 1 [Nasonia vitripennis]	1	1	1	3.7	36.909	4.5476e-05	0	0
>Cluster-1231.0;orf1 len=324 frame:1 start:16 end:987 gi|817350200|ref|XP_012300309.1| PREDICTED: ADP/ATP translocase 3 [Aotus nancymaae];>Cluster-9846.745;orf1 len=321 frame:2 start:2 end:964 gi|45829841|gb|AAH68199.1| SLC25A5 protein, partial [Homo sapiens];>Cluster-21757.0;orf1 len=310 frame:3 start:3 end:932 gi|527266605|ref|XP_005151465.1| PREDICTED: ADP/ATP translocase 3 [Melopsittacus undu…	8	2	2	6.2	35.383	3.5844e-05	21790000	1037600
>Cluster-12391.0;orf1 len=192 frame:1 start:7 end:582 gi|645041872|ref|XP_008204064.1| PREDICTED: trichohyalin-like [Nasonia vitripennis]	1	1	1	7.9	22.86	0.015063	0	0
>Cluster-12403.0;orf1 len=503 frame:-1 start:1672 end:164 gi|229577317|ref|NP_001153351.1| glucosamine (N-acetyl)-6-sulfatase precursor [Nasonia vitripennis]	1	1	1	2	56.822	0.00031179	0	0
>Cluster-17292.0;orf1 len=385 frame:-3 start:1478 end:324 gi|294945368|ref|XP_002784645.1| fructose-1,6-bisphosphate aldolase, putative [Perkinsus marinus ATCC 50983]>gi|239897830|gb|EER16441.1| fructose-1,6-bisphosphate aldolase, putative [Perkinsus marinus ATCC 50983];>Cluster-12465.1; len=128 start:64 end:445; minus strand	2	1	1	3.6	41.582	1.7425e-05	50817000	2117400
>Cluster-9846.960;orf1 len=190 frame:3 start:3 end:572 gi|62088522|dbj|BAD92708.1| ribosomal protein L12 variant [Homo sapiens];>Cluster-12646.0;orf1 len=177 frame:2 start:20 end:550 gi|478486799|ref|NP_001264608.1| 60S ribosomal protein L12 [Gallus gallus]>gi|326930180|ref|XP_003211229.1| PREDICTED: 60S ribosomal protein L12 [Meleagris gallopavo]	2	1	1	8.5	20.636	0.0079501	13869000	1386900
>Cluster-22443.0;orf1 len=163 frame:2 start:2 end:490 gi|524984012|ref|XP_005039995.1| PREDICTED: uncharacterized protein LOC101819927 [Ficedula albicollis];>Cluster-19557.0;orf2 len=159 frame:3 start:12 end:488 gi|591379190|ref|XP_007064143.1| PREDICTED: uncharacterized protein LOC102945886 [Chelonia mydas];>Cluster-14588.0; len=146 start:128 end:564; minus strand;>Cluster-9846.13562;orf2 len=14…	15	3	3	14.2	18.391	7.3512e-06	381400000	63566000
>Cluster-1277.0;orf1 len=484 frame:3 start:36 end:1487 gi|400261202|pdb|4AW6|A Chain A, Crystal Structure Of The Human Nuclear Membrane Zinc Metalloprotease Zmpste24 (face1)>gi|400261203|pdb|4AW6|B Chain B, Crystal Structure Of The Human Nuclear Membrane Zinc Metalloprotease Zmpste24 (face1)>gi|400261204|pdb|4AW6|D Chain D, Crystal Structure Of The Human Nuclear Membrane Zinc Metalloprotease Zmps…	1	2	2	5	55.808	1.4014e-05	12877000	677710
>Cluster-12790.0;orf1 len=467 frame:-2 start:1545 end:145 gi|640818029|ref|XP_008065870.1| PREDICTED: spliceosome RNA helicase DDX39B [Tarsius syrichta];>Cluster-4117.0; len=134 start:1 end:402; minus strand	2	1	1	2.1	53.243	0.0063823	25871000	1293600
>Cluster-12949.0;orf1 len=167 frame:2 start:2 end:502 gi|156708126|gb|ABU93321.1| tubulin alpha subunit [Monocercomonoides sp. PA]>gi|156708128|gb|ABU93322.1| tubulin alpha subunit [Monocercomonoides sp. PA]	1	1	1	4.2	18.679	0.054984	40564000	4056400
>Cluster-13188.0; len=374 start:96 end:1217; minus strand	1	1	1	3.2	41.561	0.010978	8574500	389750
>Cluster-13627.0;orf1 len=220 frame:3 start:84 end:743 gi|675885376|ref|XP_009028190.1| hypothetical protein HELRODRAFT_186077 [Helobdella robusta]>gi|555690548|gb|ESN93780.1| hypothetical protein HELRODRAFT_186077 [Helobdella robusta];>Cluster-23452.1;orf1 len=220 frame:3 start:84 end:743 gi|675885376|ref|XP_009028190.1| hypothetical protein HELRODRAFT_186077 [Helobdella robusta]>gi|555690548|gb…	18	3	2	16.4	24.785	7.9793e-12	24513000	1885600
>Cluster-13340.0;orf1 len=273 frame:-2 start:898 end:80 gi|815792135|ref|XP_012216653.1| PREDICTED: papilin isoform X6 [Linepithema humile]	1	2	1	9.9	29.873	1.1655e-08	44219000	2601100
>Cluster-13355.0;orf1 len=249 frame:1 start:136 end:882 gi|345497841|ref|XP_003428081.1| PREDICTED: peroxiredoxin-2 [Nasonia vitripennis];>Cluster-18549.0;orf1 len=274 frame:3 start:3 end:824 gi|674091227|ref|XP_008853698.1| PREDICTED: peroxiredoxin-2 [Nannospalax galili]>gi|674091229|ref|XP_008853699.1| PREDICTED: peroxiredoxin-2 [Nannospalax galili];>Cluster-13980.0;orf1 len=271 frame:2 start:2…	5	3	3	14.5	27.681	2.6129e-06	159160000	10611000
>Cluster-13486.1;orf1 len=140 frame:-1 start:762 end:343 gi|645023565|ref|XP_008205642.1| PREDICTED: probable salivary secreted peptide [Nasonia vitripennis]	1	1	1	7.2	15.244	0.0020661	102720000	12840000
>Cluster-1358.0;orf1 len=150 frame:-3 start:499 end:50 gi|4504981|ref|NP_002296.1| galectin-1 [Homo sapiens]>gi|114686337|ref|XP_001162104.1| PREDICTED: galectin-1 [Pan troglodytes]>gi|397501910|ref|XP_003821617.1| PREDICTED: galectin-1 [Pan paniscus]>gi|126155|sp|P09382.2|LEG1_HUMAN RecName: Full=Galectin-1; Short=Gal-1; AltName: Full=14 kDa laminin-binding protein; Short=HLBP14; AltName: Full=1…	1	3	3	18.8	16.248	1.7887e-23	186250000	20695000
>Cluster-13585.0;orf1 len=197 frame:2 start:2 end:592 gi|383866221|ref|XP_003708569.1| PREDICTED: venom allergen 3-like [Megachile rotundata]	1	6	6	46.4	21.915	2.269e-201	8403400000	840340000
>Cluster-13657.0;orf1 len=231 frame:-3 start:889 end:197 gi|766935428|ref|XP_011500079.1| PREDICTED: endocuticle structural glycoprotein SgAbd-2 [Ceratosolen solmsi marchali]	1	2	2	12.2	25.776	1.5104e-06	54914000	4576200
>Cluster-13674.0;orf1 len=150 frame:2 start:20 end:469 gi|676423444|gb|KFO64775.1| 40S ribosomal protein S16, partial [Corvus brachyrhynchos];>Cluster-9846.20960; len=147 start:66 end:506; minus strand;>Cluster-9846.70; len=69 start:1 end:206; minus strand	3	1	1	6.7	16.64	0.0067223	11055000	921230
>Cluster-9846.21452;orf1 len=492 frame:-3 start:1737 end:262 gi|194379798|dbj|BAG58251.1| unnamed protein product [Homo sapiens];>Cluster-13792.0;orf1 len=383 frame:2 start:2 end:1150 gi|470305860|ref|XP_004363302.1| heat shock protein 90a [Capsaspora owczarzaki ATCC 30864];>Cluster-17757.0; len=349 start:69 end:1114; minus strand	3	1	1	2.9	57.597	4.5435e-05	0	0
>Cluster-13842.0; len=234 start:101 end:802; minus strand	1	2	2	12.4	26.163	1.4198e-08	40451000	3111600
>Cluster-13926.0;orf1 len=703 frame:-2 start:2165 end:57 gi|283046826|ref|NP_001164357.1| diphenol oxidase 1 [Nasonia vitripennis]	1	33	33	57.3	80.898	6.7948e-243	14378000000	342330000
>Cluster-1397.0;orf1 len=489 frame:-2 start:1799 end:333 gi|593767295|ref|XP_007122147.1| PREDICTED: non-POU domain-containing octamer-binding protein isoform X1 [Physeter catodon]	1	1	1	1.8	55.956	0.0038941	0	0
>Cluster-9846.8778;orf1 len=462 frame:-3 start:3240 end:1855 gi|766936184|ref|XP_011500491.1| PREDICTED: eukaryotic peptide chain release factor subunit 1 isoform X1 [Ceratosolen solmsi marchali];>Cluster-14103.0;orf1 len=458 frame:2 start:164 end:1537 gi|524900386|ref|XP_005106613.1| PREDICTED: eukaryotic peptide chain release factor subunit 1 [Aplysia californica];>Cluster-14103.1;orf1 len=458 …	4	1	1	2.2	52.078	0.0080561	12241000	470810
>Cluster-16106.0;orf1 len=307 frame:2 start:2 end:922 gi|513173824|ref|XP_001232628.3| PREDICTED: uncharacterized protein LOC769368 isoform X1 [Gallus gallus];>Cluster-14255.0;orf1 len=296 frame:3 start:33 end:920 gi|513173824|ref|XP_001232628.3| PREDICTED: uncharacterized protein LOC769368 isoform X1 [Gallus gallus];>Cluster-17466.0;orf1 len=283 frame:2 start:2 end:850 gi|513173827|ref|XP_004940…	3	1	1	5.9	33.977	0.011811	0	0
>Cluster-14287.0;orf1 len=491 frame:2 start:35 end:1507 gi|239787860|ref|NP_001155183.1| multiple inositol polyphosphate phosphatase-like venom protein precursor [Nasonia vitripennis];>Cluster-14287.2;orf1 len=491 frame:2 start:35 end:1507 gi|239787860|ref|NP_001155183.1| multiple inositol polyphosphate phosphatase-like venom protein precursor [Nasonia vitripennis];>Cluster-14287.1; len=322 start…	3	10	10	23.7	56.079	2.665e-56	486560000	15205000
>Cluster-9846.19184;orf1 len=277 frame:-3 start:1526 end:696 gi|345489107|ref|XP_001606683.2| PREDICTED: pyrroline-5-carboxylate reductase 2 [Nasonia vitripennis]>gi|645013900|ref|XP_008205310.1| PREDICTED: pyrroline-5-carboxylate reductase 2 [Nasonia vitripennis];>Cluster-9846.19185;orf1 len=277 frame:-1 start:1526 end:696 gi|345489107|ref|XP_001606683.2| PREDICTED: pyrroline-5-carboxylate reduc…	5	1	1	4.7	29.116	2.0108e-05	10089000	720660
>Cluster-9846.9939;orf1 len=245 frame:-2 start:2607 end:1873 gi|345481856|ref|XP_003424472.1| PREDICTED: ras-like GTP-binding protein Rho1 isoform X2 [Nasonia vitripennis]>gi|645036515|ref|XP_008217015.1| PREDICTED: ras-like GTP-binding protein Rho1 isoform X2 [Nasonia vitripennis];>Cluster-2900.3;orf1 len=233 frame:3 start:3 end:701 gi|119576941|gb|EAW56537.1| hCG2043376, isoform CRA_c [Homo sap…	7	1	1	5.7	27.378	1.4591e-06	33443000	2572500
>Cluster-14976.0;orf1 len=92 frame:2 start:17 end:292 gi|238859641|ref|NP_001155022.1| cysteine-rich/TIL venom protein 2 precursor [Nasonia vitripennis]>gi|644998009|ref|XP_008215021.1| PREDICTED: cysteine-rich/TIL venom protein 2 isoform X1 [Nasonia vitripennis]	1	1	1	19.8	9.6936	6.2708e-18	82801000	20700000
>Cluster-9846.1553; len=266 start:1 end:799; minus strand;>Cluster-9846.11024;orf1 len=246 frame:-1 start:801 end:64 gi|156553282|ref|XP_001599651.1| PREDICTED: 40S ribosomal protein S3 [Nasonia vitripennis];>Cluster-15113.0; len=228 start:64 end:745; minus strand;>Cluster-24250.0;orf1 len=236 frame:-3 start:915 end:208 gi|90991377|dbj|BAE93070.1| ribosomal protein S3 [Lethenteron camtschaticum];…	6	2	2	7.9	29.142	5.1843e-10	25345000	1267300
>Cluster-15203.1;orf1 len=426 frame:-3 start:1874 end:597 gi|345486814|ref|XP_001607252.2| PREDICTED: protein yellow [Nasonia vitripennis];>Cluster-15203.0;orf1 len=414 frame:-3 start:1838 end:597 gi|345486814|ref|XP_001607252.2| PREDICTED: protein yellow [Nasonia vitripennis]	2	8	8	21.9	48.436	1.5244e-45	2504900000	147350000
>Cluster-62.0;orf1 len=103 frame:1 start:460 end:768 gi|283046811|ref|NP_001164350.1| Kazal type serine protease inhibitor-like venom protein 2 precursor [Nasonia vitripennis];>Cluster-15772.0;orf1 len=78 frame:1 start:625 end:858 gi|283046811|ref|NP_001164350.1| Kazal type serine protease inhibitor-like venom protein 2 precursor [Nasonia vitripennis]	2	1	1	13.7	11.577	4.9696e-27	47911000	15970000
>Cluster-15782.0;orf1 len=260 frame:1 start:58 end:837 gi|156553679|ref|XP_001599566.1| PREDICTED: ribonuclease Oy-like [Nasonia vitripennis];>Cluster-9846.13795;orf1 len=379 frame:-3 start:8263 end:7127 gi|766936144|ref|XP_011500468.1| PREDICTED: mitogen-activated protein kinase 1-like isoform X1 [Ceratosolen solmsi marchali]>gi|766936146|ref|XP_011500469.1| PREDICTED: mitogen-activated protein …	4	7	7	32.4	30.613	2.4356e-156	1159200000	82797000
>Cluster-1635.3;orf1 len=156 frame:2 start:2 end:469 gi|733916828|ref|XP_010720496.1| PREDICTED: 60S ribosomal protein L23a [Meleagris gallopavo];>Cluster-16333.0;orf1 len=155 frame:-3 start:500 end:36 gi|635108366|ref|XP_007977042.1| PREDICTED: 60S ribosomal protein L23a [Chlorocebus sabaeus]	2	1	1	8.4	17.564	0.0052213	8628300	1438000
>Cluster-16637.1;orf1 len=661 frame:1 start:94 end:2076 gi|645025152|ref|XP_008212918.1| PREDICTED: uncharacterized protein LOC100119874 [Nasonia vitripennis];>Cluster-16637.0;orf1 len=434 frame:1 start:94 end:1395 gi|645019128|ref|XP_008206401.1| PREDICTED: uncharacterized protein LOC103316135 [Nasonia vitripennis];>Cluster-16637.0;orf2 len=243 frame:3 start:1416 end:2144 gi|645019128|ref|XP_008…	3	22	22	42.3	76.791	0	7817200000	195430000
>Cluster-16847.0; len=141 start:328 end:750; minus strand	1	1	1	9.2	16.229	3.0462e-05	18576000	4643900
>Cluster-172.0;orf1 len=454 frame:2 start:2 end:1363 gi|817325234|ref|XP_012289516.1| PREDICTED: nucleolin [Aotus nancymaae]	1	3	3	6.4	49.428	0.00015484	51760000	1917000
>Cluster-17246.5;orf1 len=271 frame:-2 start:1236 end:424 gi|289330648|ref|NP_001166090.1| serine protease 73 precursor [Nasonia vitripennis]	1	2	2	8.1	30.412	0.0014341	16536000	1378000
>Cluster-20059.0; len=400 start:1 end:1197; minus strand;>Cluster-9846.15700;orf1 len=223 frame:1 start:385 end:1053 gi|746865663|ref|XP_011063864.1| PREDICTED: ras-related protein Rab-39B [Acromyrmex echinatior]>gi|751231359|ref|XP_011169234.1| PREDICTED: ras-related protein Rab-39B [Solenopsis invicta]>gi|751231361|ref|XP_011169235.1| PREDICTED: ras-related protein Rab-39B [Solenopsis invicta]>…	4	1	1	2.8	42.771	6.9672e-06	56754000	3338500
>Cluster-17689.0;orf1 len=302 frame:1 start:556 end:1461 gi|644994134|ref|XP_008214271.1| PREDICTED: chymotrypsin-2-like [Nasonia vitripennis]	1	6	6	35.2	33.73	4.744e-83	1234700000	82310000
>Cluster-17741.0; len=352 start:148 end:1201; minus strand	1	1	1	5.7	41.084	0.005189	24696000	1452700
>Cluster-18036.0;orf1 len=178 frame:-1 start:645 end:112 gi|289684219|ref|NP_001166258.1| cuticular protein RR-1 family member 20 precursor [Nasonia vitripennis]>gi|644995371|ref|XP_008208811.1| PREDICTED: cuticular protein RR-1 family member 20 isoform X1 [Nasonia vitripennis]	1	2	2	15.3	19.128	6.4429e-15	57433000	9572100
>Cluster-18229.0;orf1 len=234 frame:-3 start:805 end:104 gi|289063447|ref|NP_001165918.1| glutathione S-transferase S2 [Nasonia vitripennis]>gi|289177004|ref|NP_001165919.1| glutathione S-transferase S2 [Nasonia vitripennis]	1	3	3	16.7	26.807	7.3598e-07	82347000	5489800
>Cluster-9846.7528;orf2 len=514 frame:-3 start:3877 end:2336 gi|156537918|ref|XP_001608144.1| PREDICTED: actin-related protein 3 [Nasonia vitripennis]>gi|645000349|ref|XP_008215945.1| PREDICTED: actin-related protein 3 [Nasonia vitripennis]>gi|645000351|ref|XP_008215946.1| PREDICTED: actin-related protein 3 [Nasonia vitripennis]>gi|645000353|ref|XP_008215947.1| PREDICTED: actin-related protein 3 …	7	1	1	4.1	57.688	0.0033183	0	0
>Cluster-18382.0; len=234 start:1 end:700; minus strand	1	6	6	32.1	26.322	9.7434e-32	207740000	13849000
>Cluster-18445.0;orf1 len=523 frame:1 start:1 end:1569 gi|239735554|ref|NP_001155149.1| gram-negative bacteria binding protein 1-2 precursor [Nasonia vitripennis]	1	1	1	2.1	60.207	0.00015308	0	0
>Cluster-18455.0;orf1 len=115 frame:-3 start:703 end:359 gi|213972554|ref|NP_001135432.1| uncharacterized protein LOC100216322 [Nasonia vitripennis]	1	1	1	6.1	13.523	0.054418	486420000	69489000
>Cluster-1855.0;orf1 len=314 frame:-2 start:944 end:3 gi|426350908|ref|XP_004043005.1| PREDICTED: methionine adenosyltransferase 2 subunit beta isoform 1 [Gorilla gorilla gorilla]	1	1	1	3.8	34.687	6.0453e-05	126160000	6639900
>Cluster-18575.0;orf1 len=308 frame:1 start:1 end:924 gi|644997210|ref|XP_008205745.1| PREDICTED: alcohol dehydrogenase 1-like [Nasonia vitripennis];>Cluster-22128.0;orf1 len=287 frame:2 start:185 end:1045 gi|644997210|ref|XP_008205745.1| PREDICTED: alcohol dehydrogenase 1-like [Nasonia vitripennis]	2	1	1	4.2	34.222	0.0003823	0	0
>Cluster-19006.0;orf1 len=468 frame:-2 start:1583 end:180 gi|397469027|ref|XP_003806166.1| PREDICTED: elongation factor Tu, mitochondrial isoform X1 [Pan paniscus]	1	1	1	3	51.193	0.0039922	17301000	576710
>Cluster-19369.0; len=162 start:103 end:586; minus strand	1	8	8	52.2	19.869	7.1563e-27	1321900000	101690000
>Cluster-19607.0;orf1 len=359 frame:1 start:1 end:1077 gi|156552812|ref|XP_001600074.1| PREDICTED: serine protease easter [Nasonia vitripennis]>gi|645028775|ref|XP_008212252.1| PREDICTED: serine protease easter [Nasonia vitripennis]>gi|645028777|ref|XP_008212258.1| PREDICTED: serine protease easter [Nasonia vitripennis]>gi|645028779|ref|XP_008212263.1| PREDICTED: serine protease easter [Nasonia v…	3	2	2	6.7	40.169	0.00032689	66938000	3346900
>Cluster-19618.1;orf1 len=374 frame:2 start:188 end:1309 gi|345491628|ref|XP_003426664.1| PREDICTED: hyaluronidase-like [Nasonia vitripennis];>Cluster-19618.0;orf1 len=348 frame:2 start:698 end:1741 gi|345491628|ref|XP_003426664.1| PREDICTED: hyaluronidase-like [Nasonia vitripennis];>Cluster-19618.2;orf1 len=247 frame:2 start:188 end:928 gi|345491628|ref|XP_003426664.1| PREDICTED: hyaluronidase-l…	4	14	14	44.5	43.082	5.8014e-90	5278700000	310510000
>Cluster-19628.0; len=309 start:549 end:1476; minus strand;>Cluster-16097.0; len=312 start:1 end:938; minus strand	2	10	10	47.1	35.267	1.4612e-130	3676400000	204250000
>Cluster-19847.0;orf1 len=375 frame:-2 start:1127 end:3 gi|156551279|ref|XP_001601107.1| PREDICTED: alcohol dehydrogenase [NADP(+)] [Nasonia vitripennis]>gi|645007161|ref|XP_008216150.1| PREDICTED: alcohol dehydrogenase [NADP(+)] [Nasonia vitripennis]	1	2	2	5.6	42.168	4.2177e-05	42931000	2146500
>Cluster-20002.0;orf1 len=279 frame:-2 start:912 end:76 gi|345486780|ref|XP_003425554.1| PREDICTED: chymotrypsin-2-like [Nasonia vitripennis]	1	3	3	18.3	30.579	2.7476e-11	136120000	12375000
>Cluster-20050.0;orf1 len=348 frame:1 start:1 end:1044 gi|874469635|ref|XP_012953645.1| PREDICTED: malate dehydrogenase, cytoplasmic isoform X2 [Anas platyrhynchos];>Cluster-9402.0;orf1 len=340 frame:1 start:1 end:1020 gi|821012441|ref|XP_012356614.1| PREDICTED: malate dehydrogenase, cytoplasmic isoform X2 [Nomascus leucogenys];>Cluster-642.0;orf1 len=210 frame:3 start:21 end:650 gi|5174539|ref|N…	3	2	2	9.2	37.875	8.5916e-08	46253000	2890800
>Cluster-20068.0;orf1 len=558 frame:2 start:143 end:1816 gi|644999864|ref|XP_008215743.1| PREDICTED: intraflagellar transport protein 74 homolog [Nasonia vitripennis]	1	1	1	1.3	64.851	0.010363	2599300000	96271000
>Cluster-20089.0; len=550 start:233 end:1881; minus strand	1	1	1	2.6	60.669	0.0031944	61371000	2922400
>Cluster-20271.0; len=48 start:1 end:142; minus strand	1	1	1	27.7	4.8402	0.0015636	46352000	46352000
>Cluster-20285.0;orf1 len=467 frame:1 start:187 end:1587 gi|532024051|ref|XP_005355349.1| PREDICTED: heterogeneous nuclear ribonucleoprotein K isoform X1 [Microtus ochrogaster]>gi|532024053|ref|XP_005355350.1| PREDICTED: heterogeneous nuclear ribonucleoprotein K isoform X2 [Microtus ochrogaster]	1	3	3	10.3	51.27	2.5762e-11	82220000	3425800
>Cluster-2044.2;orf1 len=324 frame:-3 start:1439 end:468 gi|795233918|ref|XP_011852165.1| PREDICTED: annexin A5 [Mandrillus leucophaeus]	1	1	1	2.8	36.206	0.0035328	7122600	309680
>Cluster-20905.0;orf1 len=147 frame:1 start:1 end:441 gi|156546080|ref|XP_001601119.1| PREDICTED: uncharacterized protein LOC100116616 [Nasonia vitripennis]>gi|355389915|emb|CCD17790.1| putative odorant binding protein 21 [Nasonia vitripennis]	1	1	1	11	16.559	0.011523	14507000	1813400
>Cluster-21198.1;orf1 len=153 frame:3 start:3 end:461 gi|645021613|ref|XP_001601317.2| PREDICTED: uncharacterized protein LOC100116956 [Nasonia vitripennis]	1	3	1	20.9	16.633	1.3127e-32	76653000	15331000
>Cluster-2139.0;orf1 len=498 frame:1 start:1 end:1494 gi|795124411|ref|XP_011833044.1| PREDICTED: adenylyl cyclase-associated protein 1 isoform X1 [Mandrillus leucophaeus];>Cluster-12347.0; len=129 start:196 end:581; minus strand	2	16	16	43.7	54.07	8.129e-210	3594200000	123940000
>Cluster-2164.0;orf1 len=183 frame:-2 start:1756 end:1208 gi|594042480|ref|XP_006045774.1| PREDICTED: coactosin-like protein [Bubalus bubalis]	1	2	2	23.6	19.97	6.4536e-28	35041000	2920100
>Cluster-22377.0; len=295 start:1 end:882; minus strand;>Cluster-21938.0; len=283 start:1 end:846; minus strand	2	2	2	10.2	31.968	0.00020506	84636000	4978600
>Cluster-22033.0;orf1 len=92 frame:3 start:456 end:731 gi|826415809|ref|XP_012522644.1| PREDICTED: uncharacterized protein LOC105828714 [Monomorium pharaonis]	1	1	1	7.7	10.113	0.0095796	427300000	71217000
>Cluster-22070.0;orf1 len=431 frame:2 start:89 end:1381 gi|345488684|ref|XP_001604342.2| PREDICTED: ornithine decarboxylase-like [Nasonia vitripennis]	1	1	1	1.9	48.668	0.00088646	1183500000	45521000
>Cluster-22117.0;orf1 len=204 frame:2 start:29 end:640 gi|156552270|ref|XP_001600058.1| PREDICTED: epididymal secretory protein E1-like [Nasonia vitripennis]>gi|645017482|ref|XP_008206629.1| PREDICTED: epididymal secretory protein E1-like [Nasonia vitripennis];>Cluster-9846.11778;orf1 len=178 frame:2 start:530 end:1063 gi|156552270|ref|XP_001600058.1| PREDICTED: epididymal secretory protein E1-li…	2	2	2	16.7	23.083	2.5322e-16	45419000	4129000
>Cluster-22347.0;orf1 len=240 frame:-2 start:1233 end:514 gi|755778241|ref|XP_011285993.1| PREDICTED: GTP-binding nuclear protein Ran [Felis catus];>Cluster-19473.0;orf1 len=221 frame:-1 start:664 end:2 gi|170591300|ref|XP_001900408.1| GTP-binding nuclear protein RAN/TC4 [Brugia malayi]>gi|384872616|sp|P38542.2|RAN_BRUMA RecName: Full=GTP-binding nuclear protein Ran; AltName: Full=GTPase Ran; Alt…	6	3	3	14.2	26.717	1.0172e-09	82443000	6870200
>Cluster-22996.1;orf1 len=532 frame:1 start:589 end:2184 gi|345490901|ref|XP_001607916.2| PREDICTED: spermine oxidase-like [Nasonia vitripennis];>Cluster-22996.0;orf1 len=289 frame:1 start:367 end:1233 gi|345490901|ref|XP_001607916.2| PREDICTED: spermine oxidase-like [Nasonia vitripennis];>Cluster-22996.2;orf1 len=280 frame:1 start:589 end:1428 gi|345490901|ref|XP_001607916.2| PREDICTED: spermine…	5	5	5	12.4	60.346	1.4617e-12	73561000	2452000
>Cluster-2307.0;orf1 len=278 frame:2 start:2 end:835 gi|156545175|ref|XP_001603409.1| PREDICTED: uncharacterized protein LOC100119678 [Nasonia vitripennis]	1	8	8	43	31.142	2.3652e-153	1295600000	86373000
>Cluster-9846.11103;orf1 len=374 frame:-3 start:6075 end:4954 gi|156538338|ref|XP_001604472.1| PREDICTED: serine/threonine-protein phosphatase PP1-beta catalytic subunit [Nasonia vitripennis];	17	2	2	6.2	42.201	6.0852e-11	26978000	1419900
>Cluster-23400.0;orf1 len=201 frame:-1 start:777 end:175 gi|645021613|ref|XP_001601317.2| PREDICTED: uncharacterized protein LOC100116956 [Nasonia vitripennis];>Cluster-23400.1;orf1 len=201 frame:-2 start:777 end:175 gi|289177102|ref|NP_001165964.1| carboxylesterase clade D, member 5 precursor [Nasonia vitripennis];>Cluster-12473.0; len=380 start:306 end:1446; minus strand	3	2	1	9	23.742	1.2714e-06	293230000	26657000
>Cluster-23463.0;orf1 len=528 frame:1 start:277 end:1860 gi|345495981|ref|XP_001599057.2| PREDICTED: paramyosin isoform X2 [Nasonia vitripennis];>Cluster-23463.1;orf1 len=492 frame:3 start:111 end:1586 gi|345495981|ref|XP_001599057.2| PREDICTED: paramyosin isoform X2 [Nasonia vitripennis]	2	2	2	5.1	59.12	2.8742e-05	21093000	620380
>Cluster-2363.1;orf1 len=142 frame:-1 start:426 end:1 gi|66820396|ref|XP_643819.1| hypothetical protein DDB_G0275195 [Dictyostelium discoideum AX4]>gi|60471924|gb|EAL69878.1| hypothetical protein DDB_G0275195 [Dictyostelium discoideum AX4]	1	3	3	54.9	14.409	1.5121e-32	2268900000	324120000
>Cluster-2363.2; len=78 start:432 end:665; minus strand	1	1	1	20.8	8.5136	2.7774e-23	3854400000	963600000
>Cluster-24185.0;orf1 len=400 frame:-2 start:1334 end:135 gi|156553508|ref|XP_001600858.1| PREDICTED: lysosomal aspartic protease-like [Nasonia vitripennis]	1	1	1	4	45.755	0.00010963	77413000	4553700
>Cluster-4109.0;orf1 len=161 frame:2 start:2 end:484 gi|826333948|ref|XP_012513977.1| PREDICTED: LOW QUALITY PROTEIN: uncharacterized protein LOC105821768 [Propithecus coquereli];>Cluster-9846.9775;orf1 len=156 frame:3 start:609 end:1076 gi|156548876|ref|XP_001606447.1| PREDICTED: histone H2A [Nasonia vitripennis];>Cluster-6946.0; len=154 start:83 end:541; minus strand;>Cluster-2595.0;orf1 len=13…	26	3	1	21.9	17.457	1.0506e-08	329310000	54885000
>Cluster-2836.0;orf1 len=129 frame:-1 start:387 end:1 gi|644993820|ref|XP_001601224.2| PREDICTED: uncharacterized protein LOC100116826 [Nasonia vitripennis]	1	2	2	28.7	14.686	3.1219e-68	1090200000	363390000
>Cluster-2836.3; len=127 start:1 end:381; minus strand;>Cluster-2836.2; len=147 start:1 end:441; minus strand	2	4	4	44.4	14.428	2.3292e-19	701060000	175260000
>Cluster-2836.4; len=147 start:81 end:520; minus strand	1	5	5	33.3	16.135	1.5542e-27	1781500000	222690000
>Cluster-9846.132; len=133 start:29 end:426; minus strand;>Cluster-2916.0;orf1 len=128 frame:-2 start:419 end:36 gi|548528705|ref|XP_005700136.1| PREDICTED: 60S acidic ribosomal protein P2 [Capra hircus]>gi|803331706|ref|XP_012023966.1| PREDICTED: 60S acidic ribosomal protein P2 [Ovis aries musimon]	2	1	1	9.1	14.054	0.00051704	28034000	4004900
>Cluster-3041.0;orf1 len=175 frame:2 start:2 end:526 gi|488584167|ref|XP_004477467.1| PREDICTED: peptidyl-prolyl cis-trans isomerase H isoform X1 [Dasypus novemcinctus]	1	1	1	5.2	18.907	0.0056896	8655300	786850
>Cluster-3047.0;orf1 len=304 frame:-3 start:914 end:3 gi|156564403|ref|NP_000916.2| pyruvate dehydrogenase E1 component subunit beta, mitochondrial isoform 1 precursor [Homo sapiens]>gi|350534966|ref|NP_001233347.1| pyruvate dehydrogenase E1 component subunit beta, mitochondrial [Pan troglodytes]>gi|397480829|ref|XP_003811670.1| PREDICTED: pyruvate dehydrogenase E1 component subunit beta, mitocho…	1	1	1	5.3	33.25	0.0043629	40578000	2387000
>Cluster-3111.0;orf1 len=203 frame:1 start:1 end:609 gi|297300735|ref|XP_002805650.1| PREDICTED: 10 kDa heat shock protein, mitochondrial-like isoform 2 [Macaca mulatta]	1	1	1	3.5	21.623	0.010426	20774000	1731200
>Cluster-338.0;orf1 len=364 frame:-1 start:1215 end:124 gi|544480288|ref|XP_005575495.1| PREDICTED: macrophage-capping protein isoform X1 [Macaca fascicularis]	1	1	1	3.6	40.026	0.0038645	20791000	1386000
>Cluster-3477.0;orf1 len=237 frame:3 start:135 end:845 gi|766919155|ref|XP_011502473.1| PREDICTED: uncharacterized protein LOC105365896 [Ceratosolen solmsi marchali]	1	12	12	53	26.929	3.1837e-86	6078200000	405210000
>Cluster-4104.0;orf1 len=355 frame:2 start:29 end:1093 gi|472386205|ref|XP_004412456.1| PREDICTED: L-lactate dehydrogenase B chain-like isoform X1 [Odobenus rosmarus divergens];>Cluster-4104.1; len=178 start:1 end:532; minus strand;>Cluster-23446.1; len=231 start:1 end:691; minus strand	3	5	4	17.8	38.874	4.5919e-16	180490000	9499700
>Cluster-4304.0;orf1 len=212 frame:-3 start:811 end:176 sp|Q9LJ64|PLRX1_ARATH Pollen-specific leucine-rich repeat extensin-like protein 1 OS=Arabidopsis thaliana GN=PEX1 PE=2 SV=1	1	1	1	6.6	21.682	0.0072081	28558000	4759600
>Cluster-4340.0;orf1 len=233 frame:-1 start:815 end:117 gi|397475051|ref|XP_003846056.1| PREDICTED: LOW QUALITY PROTEIN: heat shock protein beta-1 [Pan paniscus];>Cluster-11361.0; len=123 start:1 end:369; minus strand;>Cluster-6256.0;orf1 len=115 frame:-3 start:461 end:117 gi|545687155|ref|NP_001270814.1| uncharacterized protein LOC101865323 [Macaca fascicularis]>gi|90082004|dbj|BAE90283.1| unnam…	3	4	4	22.8	25.704	1.0843e-09	228370000	14273000
>Cluster-9846.10887;orf1 len=98 frame:3 start:189 end:482 gi|156554389|ref|XP_001600882.1| PREDICTED: probable small nuclear ribonucleoprotein E [Nasonia vitripennis];>Cluster-4375.0; len=93 start:50 end:328; minus strand;>Cluster-9986.0; len=93 start:50 end:328; minus strand	3	1	1	11.3	11.27	0.00089947	16625000	4156400
>Cluster-4528.0;orf1 len=222 frame:1 start:1 end:666 gi|40788953|dbj|BAA04802.2| KIAA0120 [Homo sapiens];>Cluster-9238.2;orf1 len=220 frame:3 start:27 end:686 gi|852791065|ref|XP_012886136.1| PREDICTED: transgelin-2 [Dipodomys ordii]>gi|852791068|ref|XP_012886137.1| PREDICTED: transgelin-2 [Dipodomys ordii];>Cluster-19622.0; len=95 start:1 end:281; minus strand	3	3	3	15.4	24.652	2.9902e-12	86248000	6160600
>Cluster-9846.11976;orf1 len=433 frame:2 start:8 end:1306 gi|645022296|ref|XP_001599320.2| PREDICTED: ribose-phosphate pyrophosphokinase 1 isoform X2 [Nasonia vitripennis];>Cluster-9846.11609;orf1 len=408 frame:2 start:8 end:1231 gi|766942144|ref|XP_011503725.1| PREDICTED: ribose-phosphate pyrophosphokinase 1 isoform X2 [Ceratosolen solmsi marchali];>Cluster-5453.0;orf1 len=322 frame:3 start:114 …	4	1	1	3.9	47.376	0.010534	10346000	544510
>Cluster-5495.1;orf1 len=389 frame:-3 start:1466 end:300 gi|594622025|ref|XP_007198794.1| PREDICTED: LOW QUALITY PROTEIN: heterogeneous nuclear ribonucleoprotein D (AU-rich element RNA binding protein 1, 37kDa) [Balaenoptera acutorostrata scammoni];>Cluster-5495.0;orf1 len=340 frame:-3 start:1319 end:300 gi|594099652|ref|XP_006072953.1| PREDICTED: heterogeneous nuclear ribonucleoprotein D0-like i…	5	2	2	5.2	41.352	0.0010405	12469000	890640
>Cluster-5608.0;orf1 len=365 frame:3 start:3 end:1097 gi|635139449|ref|XP_008016570.1| PREDICTED: malate dehydrogenase, mitochondrial isoform X1 [Chlorocebus sabaeus];>Cluster-23762.0; len=321 start:149 end:1109; minus strand	2	2	2	9.9	38.292	1.1588e-09	21892000	995090
>Cluster-5754.0; len=709 start:687 end:2811; minus strand	1	4	2	7.2	76.806	2.5583e-14	19518000	557650
>Cluster-579.0; len=250 start:139 end:888; minus strand	1	3	3	12.4	28.723	2.976e-07	20220000	1348000
>Cluster-7439.4;orf1 len=221 frame:-1 start:966 end:304 gi|725577125|ref|XP_003931694.2| PREDICTED: rho GDP-dissociation inhibitor 1 isoform X1 [Saimiri boliviensis boliviensis]	1	1	1	6.8	24.937	5.4328e-05	26910000	3844300
>Cluster-7439.6;orf1 len=379 frame:-2 start:1306 end:170 gi|795094971|ref|XP_011789804.1| PREDICTED: phosphate carrier protein, mitochondrial isoform X2 [Colobus angolensis palliatus]>gi|795094978|ref|XP_011789813.1| PREDICTED: phosphate carrier protein, mitochondrial isoform X2 [Colobus angolensis palliatus]>gi|795094985|ref|XP_011789822.1| PREDICTED: phosphate carrier protein, mitochondrial iso…	1	1	1	2.1	42.069	0.01118	0	0
>Cluster-7834.0;orf1 len=403 frame:-1 start:1451 end:243 gi|426339870|ref|XP_004033862.1| PREDICTED: cartilage-associated protein [Gorilla gorilla gorilla]	1	1	1	1.7	46.459	0.010616	1898300000	73010000
>Cluster-7973.0;orf1 len=319 frame:-1 start:958 end:2 gi|528767051|gb|EPY86710.1| leucine-rich repeat-containing protein 59 [Camelus ferus];>Cluster-7973.2;orf1 len=311 frame:-1 start:935 end:3 gi|507654714|ref|XP_004633686.1| PREDICTED: leucine-rich repeat-containing protein 59 [Octodon degus]	2	1	1	3.8	35.923	0.00109	0	0
>Cluster-8018.1;orf1 len=453 frame:-1 start:1361 end:3 gi|471377936|ref|XP_004376774.1| PREDICTED: heat shock protein HSP 90-alpha isoform X1 [Trichechus manatus latirostris];>Cluster-8018.4;orf1 len=344 frame:-1 start:1854 end:823 gi|528768092|gb|EPY87751.1| heat shock protein HSP 90-alpha [Camelus ferus];>Cluster-21129.1; len=370 start:257 end:1364; minus strand;>Cluster-21129.3; len=81 start:1…	4	7	3	19	53.468	1.9463e-34	91558000	3980800
>Cluster-8027.0; len=576 start:127 end:1852; minus strand	1	11	2	22.4	61.75	1.6704e-34	69542000	2173200
>Cluster-8730.1;orf1 len=146 frame:-3 start:612 end:175 gi|50592994|ref|NP_003320.2| thioredoxin isoform 1 [Homo sapiens]>gi|209413800|ref|NP_001125903.1| thioredoxin [Pongo abelii]>gi|332217350|ref|XP_003257823.1| PREDICTED: thioredoxin [Nomascus leucogenys]>gi|332832610|ref|XP_001142154.2| PREDICTED: thioredoxin [Pan troglodytes]>gi|397479234|ref|XP_003810932.1| PREDICTED: thioredoxin isoform X…	2	2	2	15.2	15.846	8.4747e-05	80902000	8989100
>Cluster-8939.0; len=516 start:13 end:1560; minus strand	1	3	3	8.3	58.749	7.3343e-14	42783000	1426100
>Cluster-8992.0; len=115 start:1 end:343; minus strand	1	1	1	8.7	12.275	0.0080327	40051000	10013000
>Cluster-9133.0;orf1 len=275 frame:2 start:38 end:862 gi|156553679|ref|XP_001599566.1| PREDICTED: ribonuclease Oy-like [Nasonia vitripennis];>Cluster-9133.2;orf1 len=271 frame:2 start:38 end:850 gi|156553679|ref|XP_001599566.1| PREDICTED: ribonuclease Oy-like [Nasonia vitripennis]	2	15	15	67.5	31.988	1.6882e-201	17952000000	1056000000
>Cluster-9181.0;orf1 len=493 frame:3 start:3 end:1481 gi|397503050|ref|XP_003822149.1| PREDICTED: 6-phosphogluconate dehydrogenase, decarboxylating isoform X2 [Pan paniscus]	1	2	1	5.7	53.957	9.7186e-07	14563000	606800
>Cluster-9320.0;orf1 len=508 frame:-2 start:1672 end:149 gi|470512053|ref|XP_004352093.1| peptidase, S8/S53 subfamily protein [Acanthamoeba castellanii str. Neff]>gi|440802014|gb|ELR22954.1| peptidase, S8/S53 subfamily protein [Acanthamoeba castellanii str. Neff]	1	1	1	2.6	52.974	0.045877	0	0
>Cluster-9722.3;orf1 len=375 frame:-1 start:1674 end:550 gi|55956921|ref|NP_004490.2| heterogeneous nuclear ribonucleoprotein A/B isoform b [Homo sapiens]>gi|426351246|ref|XP_004043166.1| PREDICTED: heterogeneous nuclear ribonucleoprotein A/B isoform 2 [Gorilla gorilla gorilla]>gi|12803583|gb|AAH02625.1| Heterogeneous nuclear ribonucleoprotein A/B [Homo sapiens]>gi|13528732|gb|AAH04561.1| Heterog…	2	1	1	3.7	40.168	0.00063356	19195000	1476500
>Cluster-9846.8531;orf1 len=2847 frame:3 start:147 end:8687 gi|645021047|ref|XP_008207429.1| PREDICTED: LOW QUALITY PROTEIN: talin-2 [Nasonia vitripennis];>Cluster-9756.0; len=636 start:381 end:2287; minus strand	2	1	1	0.4	310.27	0.0026054	0	0
>Cluster-9804.0; len=309 start:1 end:925; minus strand	1	1	1	3.6	32.17	9.513e-25	0	0
>Cluster-9820.0;orf1 len=234 frame:1 start:1 end:702 gi|4504183|ref|NP_000843.1| glutathione S-transferase P [Homo sapiens]>gi|121746|sp|P09211.2|GSTP1_HUMAN RecName: Full=Glutathione S-transferase P; AltName: Full=GST class-pi; AltName: Full=GSTP1-1>gi|4389047|pdb|12GS|A Chain A, Glutathione S-transferase Complexed With S-nonyl-glutathione>gi|4389048|pdb|12GS|B Chain B, Glutathione S-transferase…	1	3	3	22.3	25.998	2.8343e-14	104980000	9543600
>Cluster-9846.10001;orf2 len=325 frame:-2 start:12117 end:11143 gi|861642043|gb|KMQ93778.1| serine threonine-protein phosphatase 2a catalytic subunit alpha isoform-like protein [Lasius niger];>Cluster-9846.10296;orf1 len=325 frame:-2 start:11962 end:10988 gi|861642043|gb|KMQ93778.1| serine threonine-protein phosphatase 2a catalytic subunit alpha isoform-like protein [Lasius niger];>Cluster-9846.1…	5	1	1	3.4	37.085	0.0062602	13055000	725260
>Cluster-9846.10017;orf1 len=252 frame:-2 start:1071 end:316 gi|289629282|ref|NP_001166224.1| ferritin precursor [Nasonia vitripennis]	1	3	3	13.1	28.281	1.6777e-05	96185000	6870300
>Cluster-9846.10046;orf1 len=331 frame:1 start:64 end:1056 gi|645026140|ref|XP_001600184.3| PREDICTED: uncharacterized protein LOC100115464 [Nasonia vitripennis]	1	3	3	10.3	36.687	5.145e-08	61660000	3083000
>Cluster-9846.10054;orf1 len=745 frame:-3 start:3540 end:1306 gi|645007516|ref|XP_008216297.1| PREDICTED: GMP synthase [glutamine-hydrolyzing] [Nasonia vitripennis]>gi|645007518|ref|XP_008216298.1| PREDICTED: GMP synthase [glutamine-hydrolyzing] [Nasonia vitripennis]>gi|645007520|ref|XP_008216299.1| PREDICTED: GMP synthase [glutamine-hydrolyzing] [Nasonia vitripennis]>gi|645007522|ref|XP_00821630…	3	1	1	1.3	82.001	2.5507e-05	9865300	246630
>Cluster-9846.10078;orf1 len=86 frame:3 start:357 end:614 gi|238859585|ref|NP_001154995.1| Kazal type serine protease inhibitor-like venom protein 1 precursor [Nasonia vitripennis]>gi|645034922|ref|XP_008209036.1| PREDICTED: Kazal type serine protease inhibitor-like venom protein 1 isoform X1 [Nasonia vitripennis];>Cluster-9846.16739;orf1 len=68 frame:1 start:58 end:261 gi|238859585|ref|NP_001154…	2	2	2	29.4	9.5382	5.2855e-26	7753500000	1550700000
>Cluster-9846.10117;orf1 len=140 frame:-2 start:479 end:60 gi|645001778|ref|XP_001607540.2| PREDICTED: 40S ribosomal protein S26 [Nasonia vitripennis]	1	1	1	10.8	15.998	0.0011395	0	0
>Cluster-9846.11019;orf1 len=2323 frame:3 start:423 end:7391 gi|645020351|ref|XP_008207125.1| PREDICTED: spectrin beta chain isoform X5 [Nasonia vitripennis];>Cluster-9846.10121;orf1 len=2304 frame:3 start:423 end:7334 gi|645020353|ref|XP_008207126.1| PREDICTED: spectrin beta chain isoform X6 [Nasonia vitripennis];>Cluster-9846.10127;orf1 len=2304 frame:3 start:423 end:7334 gi|645020353|ref|XP_00…	7	1	1	0.6	269.39	3.7061e-18	102840000	734540
>Cluster-9846.10122;orf1 len=3415 frame:1 start:1 end:10245 gi|156538313|ref|XP_001604024.1| PREDICTED: apolipophorins [Nasonia vitripennis]	1	29	29	10.7	379.08	1.5854e-97	928500000	4938800
>Cluster-9846.10129;orf1 len=160 frame:1 start:229 end:708 gi|156542763|ref|XP_001602492.1| PREDICTED: cofilin/actin-depolymerizing factor homolog [Nasonia vitripennis]	1	8	8	56.6	17.884	7.3245e-46	865800000	78709000
>Cluster-9846.10152;orf1 len=422 frame:3 start:123 end:1388 gi|766938018|ref|XP_011501490.1| PREDICTED: beta-ureidopropionase-like [Ceratosolen solmsi marchali]	1	5	5	17.8	47.143	5.5247e-30	114960000	6050700
>Cluster-9846.10181;orf1 len=498 frame:2 start:164 end:1657 gi|766932711|ref|XP_011498590.1| PREDICTED: aldehyde dehydrogenase X, mitochondrial [Ceratosolen solmsi marchali]	1	4	4	12.9	53.34	2.4547e-14	128990000	4777500
>Cluster-9846.10199;orf1 len=255 frame:3 start:243 end:1007 gi|345483163|ref|XP_001607558.2| PREDICTED: tropinone reductase 2-like [Nasonia vitripennis];>Cluster-9846.8519;orf1 len=255 frame:3 start:165 end:929 gi|345483163|ref|XP_001607558.2| PREDICTED: tropinone reductase 2-like [Nasonia vitripennis]	2	2	2	9.4	27.097	7.7162e-06	73471000	4321800
>Cluster-9846.1021;orf1 len=595 frame:-3 start:2693 end:909 gi|766925514|ref|XP_011494654.1| PREDICTED: delta-1-pyrroline-5-carboxylate dehydrogenase, mitochondrial [Ceratosolen solmsi marchali];>Cluster-9846.1022;orf2 len=347 frame:-1 start:1949 end:909 gi|345483689|ref|XP_001601273.2| PREDICTED: delta-1-pyrroline-5-carboxylate dehydrogenase, mitochondrial isoform X1 [Nasonia vitripennis];>Clust…	3	4	4	8.8	66.733	4.9926e-21	15124000	444810
>Cluster-9846.10216;orf1 len=166 frame:1 start:1 end:498 gi|645004598|ref|XP_008209965.1| PREDICTED: 40S ribosomal protein S12 isoform X1 [Nasonia vitripennis];>Cluster-12677.0;orf1 len=157 frame:3 start:66 end:536 gi|675885168|ref|XP_009028086.1| hypothetical protein HELRODRAFT_186065 [Helobdella robusta]>gi|555690654|gb|ESN93886.1| hypothetical protein HELRODRAFT_186065 [Helobdella robusta]	2	3	3	20.6	17.911	3.1372e-28	388960000	38896000
>Cluster-9846.10217;orf1 len=547 frame:1 start:49 end:1689 gi|645017293|ref|XP_008205526.1| PREDICTED: dihydrolipoyllysine-residue succinyltransferase component of 2-oxoglutarate dehydrogenase complex, mitochondrial isoform X2 [Nasonia vitripennis]	1	7	7	17.8	59.483	1.6963e-44	1042700000	35955000
>Cluster-9846.10227;orf1 len=586 frame:2 start:2243 end:4000 sp|Q9VXG4|ANX11_DROME Annexin B11 OS=Drosophila melanogaster GN=AnxB11 PE=2 SV=2;>Cluster-9846.11077;orf2 len=586 frame:2 start:2267 end:4024 gi|229606111|ref|NP_001153462.1| annexin B11 isoform B [Nasonia vitripennis];>Cluster-9846.12882;orf2 len=586 frame:1 start:1840 end:3597 gi|645034412|ref|XP_008201883.1| PREDICTED: glucosylcerami…	7	2	2	4.4	64.193	2.8603e-07	32670000	1485000
>Cluster-9846.10230;orf1 len=832 frame:-1 start:3114 end:619 gi|766925740|ref|XP_011494775.1| PREDICTED: endoplasmin [Ceratosolen solmsi marchali]	1	5	4	6.1	95.201	2.7979e-12	46687000	1037500
>Cluster-9846.10242;orf2 len=175 frame:1 start:706 end:1230 gi|156549098|ref|XP_001607577.1| PREDICTED: uncharacterized protein LOC100123831 [Nasonia vitripennis]	1	5	5	37.9	17.927	1.0138e-28	834240000	69520000
>Cluster-9846.10250;orf1 len=192 frame:3 start:3 end:578 gi|156536860|ref|XP_001604071.1| PREDICTED: uncharacterized protein LOC100113619 [Nasonia vitripennis]	1	4	4	31.9	20.605	9.1043e-13	424000000	42400000
>Cluster-9846.10259;orf1 len=272 frame:3 start:42 end:857 gi|345498058|ref|XP_001604439.2| PREDICTED: uncharacterized protein LOC100120839 [Nasonia vitripennis]	1	7	7	23.6	31.276	8.1891e-16	560090000	31116000
>Cluster-9846.10262;orf1 len=465 frame:3 start:201 end:1595 gi|266634746|ref|NP_001161183.1| serpin 5 precursor [Nasonia vitripennis]	1	4	4	9.1	51.686	1.2267e-12	150950000	6563000
>Cluster-9846.10269;orf1 len=257 frame:-2 start:1685 end:915 gi|645039458|ref|XP_008203832.1| PREDICTED: ferritin heavy polypeptide-like 17 [Nasonia vitripennis]	1	5	5	25	28.948	2.1096e-16	276130000	25102000
>Cluster-9846.10274;orf1 len=210 frame:-1 start:982 end:353 gi|645010083|ref|XP_008213406.1| PREDICTED: troponin I isoform X14 [Nasonia vitripennis];>Cluster-9846.10273;orf1 len=204 frame:-1 start:964 end:353 gi|645010088|ref|XP_008213410.1| PREDICTED: troponin I isoform X16 [Nasonia vitripennis];>Cluster-9846.14230;orf1 len=220 frame:-1 start:1223 end:564 gi|766941751|ref|XP_011503524.1| PREDICT…	3	10	6	33.5	25.04	5.8636e-98	6033300000	754170000
>Cluster-9846.10278;orf1 len=215 frame:-2 start:780 end:136 gi|345494466|ref|XP_003427298.1| PREDICTED: peptidyl-prolyl cis-trans isomerase B [Nasonia vitripennis]	1	9	9	48.1	23.238	1.7706e-36	1822200000	140170000
>Cluster-9846.11287;orf1 len=248 frame:2 start:2 end:745 gi|815927583|ref|XP_012248320.1| PREDICTED: myosin regulatory light chain 2 [Bombus impatiens];>Cluster-9846.10319;orf1 len=222 frame:1 start:151 end:816 gi|815927583|ref|XP_012248320.1| PREDICTED: myosin regulatory light chain 2 [Bombus impatiens]	2	7	7	34.8	27.614	2.905e-140	767370000	59028000
>Cluster-9846.11224; len=429 start:129 end:1415; minus strand;>Cluster-9846.11222; len=392 start:129 end:1303; minus strand;>Cluster-9846.10746;orf1 len=349 frame:3 start:84 end:1130 gi|751209329|ref|XP_011157314.1| PREDICTED: RNA-binding protein lark isoform X7 [Solenopsis invicta];>Cluster-9846.10335;orf1 len=347 frame:3 start:84 end:1124 gi|766940722|ref|XP_011502970.1| PREDICTED: RNA-binding …	14	2	2	5.1	48.398	1.5406e-07	110810000	4261800
>Cluster-9846.10371;orf1 len=480 frame:2 start:47 end:1486 gi|741893281|ref|XP_005195212.2| PREDICTED: tubulin alpha-3 chain isoform X1 [Bos taurus];>Cluster-9846.9878; len=303 start:1 end:907; minus strand;>Cluster-9846.20036; len=212 start:1 end:633; minus strand;>Cluster-9846.20894;orf1 len=494 frame:1 start:37 end:1518 gi|642990257|gb|AIA82433.1| alpha-tubulin-like protein 01 [Stentor coerule…	8	9	2	29.6	53.303	1.773e-54	182550000	8297700
>Cluster-9846.10402;orf1 len=234 frame:3 start:15 end:716 gi|805784468|ref|XP_003703131.2| PREDICTED: 60S ribosomal protein L9 [Megachile rotundata]	1	2	2	10.3	26.29	1.0977e-13	51232000	4269400
>Cluster-9846.10407;orf1 len=598 frame:2 start:29 end:1822 gi|345488366|ref|XP_003425889.1| PREDICTED: protein ROP isoform X1 [Nasonia vitripennis]	1	1	1	2.7	68.261	0.0012393	10329000	286910
>Cluster-9846.10409;orf1 len=71 frame:-3 start:470 end:258 gi|156543328|ref|XP_001606958.1| PREDICTED: 40S ribosomal protein S28 [Nasonia vitripennis]>gi|766919861|ref|XP_011504375.1| PREDICTED: 40S ribosomal protein S28 [Ceratosolen solmsi marchali]	1	1	1	12.9	7.9982	0.0063249	0	0
>Cluster-9846.10417;orf1 len=388 frame:-3 start:1395 end:232 gi|766918508|ref|XP_011498731.1| PREDICTED: lysosomal aspartic protease [Ceratosolen solmsi marchali]	1	9	9	37.5	42.026	8.8883e-53	550240000	30569000
>Cluster-9846.10457;orf1 len=263 frame:1 start:304 end:1092 gi|759047050|ref|XP_011332534.1| PREDICTED: 14-3-3 protein zeta isoform X1 [Cerapachys biroi];>Cluster-9846.11113;orf1 len=262 frame:2 start:359 end:1144 gi|759047050|ref|XP_011332534.1| PREDICTED: 14-3-3 protein zeta isoform X1 [Cerapachys biroi];>Cluster-7851.0;orf1 len=257 frame:3 start:153 end:923 gi|395849798|ref|XP_003797501.1| PRE…	28	8	5	35.1	29.58	2.1517e-62	1821700000	113850000
>Cluster-9846.10784;orf1 len=496 frame:3 start:165 end:1652 gi|645036048|ref|XP_008216886.1| PREDICTED: plasminogen activator inhibitor 1 RNA-binding protein-like isoform X1 [Nasonia vitripennis];>Cluster-9846.10797;orf1 len=492 frame:3 start:165 end:1640 gi|645036051|ref|XP_008216887.1| PREDICTED: plasminogen activator inhibitor 1 RNA-binding protein-like isoform X2 [Nasonia vitripennis];>Cluste…	3	1	1	3.2	55.658	0.010371	0	0
>Cluster-9846.10639;orf1 len=442 frame:3 start:276 end:1601 gi|645031490|ref|XP_008210146.1| PREDICTED: failed axon connections isoform X1 [Nasonia vitripennis];>Cluster-9846.10474;orf1 len=437 frame:3 start:276 end:1586 gi|345494300|ref|XP_001606801.2| PREDICTED: failed axon connections isoform X2 [Nasonia vitripennis]	2	2	2	4.8	49.651	6.8201e-06	43199000	2057100
>Cluster-9846.10476;orf1 len=529 frame:1 start:1846 end:3432 gi|345480945|ref|XP_003424252.1| PREDICTED: uncharacterized protein LOC100680511 [Nasonia vitripennis]	1	11	10	21.2	59.862	5.5554e-80	2395600000	77277000
>Cluster-9846.10478;orf1 len=350 frame:2 start:197 end:1246 gi|156552406|ref|XP_001602166.1| PREDICTED: transaldolase isoform X2 [Nasonia vitripennis];>Cluster-9846.1689;orf1 len=348 frame:1 start:1 end:1044 gi|57099501|ref|XP_533146.1| PREDICTED: transaldolase isoform 4 [Canis lupus familiaris]>gi|359321944|ref|XP_003639736.1| PREDICTED: transaldolase-like [Canis lupus familiaris]	2	3	3	9.5	38.903	1.7321e-08	262270000	13804000
>Cluster-9846.10483;orf1 len=1849 frame:-1 start:6699 end:1153 gi|644997257|ref|XP_008212277.1| PREDICTED: titin isoform X1 [Nasonia vitripennis]	1	6	6	4.9	208.66	2.2356e-27	113370000	1206000
>Cluster-9846.10487;orf1 len=197 frame:3 start:570 end:1160 gi|645012074|ref|XP_008204595.1| PREDICTED: peroxiredoxin-5, mitochondrial isoform X1 [Nasonia vitripennis]	1	3	3	21.9	20.904	6.0705e-23	236680000	19723000
>Cluster-9846.8466;orf1 len=335 frame:-1 start:3489 end:2485 gi|156549876|ref|XP_001603892.1| PREDICTED: probable ribosome biogenesis protein RLP24 [Nasonia vitripennis];>Cluster-9846.10490;orf1 len=271 frame:-2 start:3297 end:2485 gi|345490916|ref|XP_001607941.2| PREDICTED: upstream activation factor subunit spp27 [Nasonia vitripennis]	2	2	2	7.8	38.341	2.5468e-05	75941000	6903700
>Cluster-9846.10498;orf1 len=367 frame:2 start:215 end:1315 gi|755984546|ref|XP_011310556.1| PREDICTED: malate dehydrogenase, mitochondrial [Fopius arisanus];REV__>Cluster-9846.10498;orf1 len=367 frame:2 start:215 end:1315 gi|755984546|ref|XP_011310556.1| PREDICTED: malate dehydrogenase, mitochondrial [Fopius arisanus]	2	14	14	52.5	38.696	6.4266e-87	3413800000	162560000
>Cluster-9846.10502;orf1 len=1061 frame:3 start:288 end:3470 gi|766942064|ref|XP_011503681.1| PREDICTED: ubiquitin-like modifier-activating enzyme 1 [Ceratosolen solmsi marchali];>Cluster-7106.1;orf1 len=1121 frame:-1 start:3550 end:188 gi|768033354|ref|XP_011542256.1| PREDICTED: ubiquitin-like modifier-activating enzyme 1 isoform X3 [Homo sapiens];>Cluster-7106.0;orf1 len=1069 frame:-1 start:339…	4	3	3	3.6	119.16	4.2801e-18	51241000	931660
>Cluster-9846.10536;orf1 len=669 frame:-1 start:2708 end:702 gi|815903390|ref|XP_012237680.1| PREDICTED: NADP-dependent malic enzyme isoform X1 [Bombus impatiens]	1	15	15	32.2	73.847	2.0028e-109	751010000	17881000
>Cluster-9846.9411;orf1 len=378 frame:-2 start:2343 end:1210 gi|645030892|ref|XP_008209994.1| PREDICTED: RNA-binding protein squid isoform X4 [Nasonia vitripennis];>Cluster-9846.10945;orf2 len=357 frame:-3 start:2466 end:1396 gi|645030884|ref|XP_008209992.1| PREDICTED: RNA-binding protein squid isoform X1 [Nasonia vitripennis];>Cluster-9846.9413;orf1 len=355 frame:-2 start:2460 end:1396 gi|645030…	6	3	3	11.7	40.913	4.783e-23	41555000	2597200
>Cluster-9846.10549;orf1 len=185 frame:2 start:62 end:616 gi|156549869|ref|XP_001599602.1| PREDICTED: 40S ribosomal protein S10 [Nasonia vitripennis]	1	3	3	22.8	20.881	2.7006e-08	131290000	13129000
>Cluster-9846.10551;orf1 len=541 frame:-2 start:3571 end:1949 gi|345490491|ref|XP_003426390.1| PREDICTED: T-complex protein 1 subunit beta [Nasonia vitripennis];>Cluster-3799.0;orf1 len=555 frame:-3 start:1902 end:238 gi|640816047|ref|XP_008064813.1| PREDICTED: T-complex protein 1 subunit beta isoform X1 [Tarsius syrichta]	2	2	2	4.4	58.491	1.4261e-06	29046000	880180
>Cluster-9846.10574;orf1 len=397 frame:3 start:588 end:1778 gi|239050219|ref|NP_001155077.1| serine protease 16 precursor [Nasonia vitripennis]	1	20	20	57.1	43.079	5.6877e-185	36988000000	1681300000
>Cluster-9846.10575;orf1 len=415 frame:3 start:147 end:1391 gi|270298178|gb|ACZ68113.1| calreticulin [Pteromalus puparum]	1	11	11	38.9	48.527	1.9315e-121	2882000000	102930000
>Cluster-9846.10586;orf1 len=814 frame:-2 start:2618 end:177 gi|645028854|ref|XP_008204459.1| PREDICTED: venom dipeptidyl peptidase 4 isoform X1 [Nasonia vitripennis];>Cluster-9846.15400;orf1 len=814 frame:-3 start:2618 end:177 gi|645028854|ref|XP_008204459.1| PREDICTED: venom dipeptidyl peptidase 4 isoform X1 [Nasonia vitripennis]	2	18	18	29.4	91.611	1.5082e-80	1429800000	29180000
>Cluster-9846.10589;orf1 len=496 frame:-2 start:5989 end:4502 gi|345481224|ref|XP_001604026.2| PREDICTED: mesencephalic astrocyte-derived neurotrophic factor homolog [Nasonia vitripennis]>gi|645027158|ref|XP_008209013.1| PREDICTED: mesencephalic astrocyte-derived neurotrophic factor homolog [Nasonia vitripennis]	1	2	2	3.8	55.01	0.00012817	31362000	1844800
>Cluster-9846.1063;orf1 len=262 frame:2 start:2 end:787 gi|226529917|ref|NP_001152759.1| triosephosphate isomerase isoform 2 [Homo sapiens]>gi|353526311|sp|P60174.3|TPIS_HUMAN RecName: Full=Triosephosphate isomerase; Short=TIM; AltName: Full=Triose-phosphate isomerase>gi|119609128|gb|EAW88722.1| triosephosphate isomerase 1, isoform CRA_b [Homo sapiens]>gi|119609129|gb|EAW88723.1| triosephosphate …	1	1	1	5.7	27.884	0.0011402	29320000	1543200
>Cluster-9846.10645;orf1 len=959 frame:3 start:198 end:3074 gi|817202881|ref|XP_012277240.1| PREDICTED: neutral alpha-glucosidase AB [Orussus abietinus]	1	6	6	8.6	109.17	4.0966e-16	157520000	3351500
>Cluster-9846.10652;orf1 len=492 frame:2 start:281 end:1756 gi|766930895|ref|XP_011497603.1| PREDICTED: LOW QUALITY PROTEIN: bleomycin hydrolase [Ceratosolen solmsi marchali]	1	5	5	12.4	55.963	1.7782e-134	309650000	9988800
>Cluster-9846.10675;orf1 len=287 frame:2 start:2 end:862 gi|345498311|ref|XP_001607037.2| PREDICTED: circadian clock-controlled protein-like [Nasonia vitripennis]	1	1	1	4.5	31.968	0.001184	17667000	1104200
>Cluster-9846.10680;orf1 len=520 frame:1 start:454 end:2013 gi|766935105|ref|XP_011499900.1| PREDICTED: aldehyde dehydrogenase, mitochondrial [Ceratosolen solmsi marchali]	1	5	5	11.6	56.588	3.5241e-15	91944000	3170500
>Cluster-9846.1074; len=80 start:1 end:240; minus strand	1	1	1	18.8	9.0062	0.0021108	12041000	2408100
>Cluster-9846.10760;orf1 len=1796 frame:3 start:3 end:5390 sp|Q868N5|VIT_APIME Vitellogenin OS=Apis mellifera GN=Vg PE=1 SV=1	1	39	39	30.6	202.19	0	5034000000	50849000
>Cluster-9846.10776;orf1 len=854 frame:2 start:233 end:2794 gi|766939487|ref|XP_011502300.1| PREDICTED: translation elongation factor 2 [Ceratosolen solmsi marchali];>Cluster-9846.10776;orf2 len=854 frame:-2 start:5420 end:2859 gi|766939487|ref|XP_011502300.1| PREDICTED: translation elongation factor 2 [Ceratosolen solmsi marchali];>Cluster-9846.12217;orf1 len=854 frame:-2 start:3980 end:1419 gi|…	4	13	10	16.4	95.475	5.4173e-35	834280000	17751000
>Cluster-9846.10779;orf1 len=1058 frame:3 start:54 end:3227 gi|345490570|ref|XP_001603702.2| PREDICTED: lysosomal alpha-mannosidase-like isoform X1 [Nasonia vitripennis];>Cluster-9846.12945;orf1 len=1058 frame:3 start:54 end:3227 gi|345490570|ref|XP_001603702.2| PREDICTED: lysosomal alpha-mannosidase-like isoform X1 [Nasonia vitripennis]	2	6	6	7	120.77	1.6904e-27	101310000	1876100
>Cluster-9846.11824;orf1 len=372 frame:3 start:762 end:1877 gi|645007426|ref|XP_008216263.1| PREDICTED: fibrous sheath CABYR-binding protein-like isoform X2 [Nasonia vitripennis];>Cluster-9846.10788;orf1 len=232 frame:2 start:3632 end:4327 gi|156551380|ref|XP_001603195.1| PREDICTED: fibrous sheath CABYR-binding protein-like isoform X1 [Nasonia vitripennis]>gi|645007419|ref|XP_008216260.1| PREDICT…	3	1	1	7	38.216	0.010234	0	0
>Cluster-9846.12442;orf1 len=318 frame:1 start:163 end:1116 gi|645016937|ref|XP_008211693.1| PREDICTED: uncharacterized protein LOC100114909, partial [Nasonia vitripennis];>Cluster-9846.10795;orf1 len=308 frame:1 start:163 end:1086 gi|645016937|ref|XP_008211693.1| PREDICTED: uncharacterized protein LOC100114909, partial [Nasonia vitripennis]	2	2	2	11.4	34.121	2.1223e-16	178060000	19784000
>Cluster-9846.10809;orf1 len=380 frame:-3 start:1419 end:280 gi|766926823|ref|XP_011495377.1| PREDICTED: malate dehydrogenase, cytoplasmic [Ceratosolen solmsi marchali]	1	7	7	24.5	41.385	6.6073e-43	593350000	26970000
>Cluster-9846.10814;orf1 len=342 frame:2 start:674 end:1699 gi|644995801|ref|XP_008209259.1| PREDICTED: cathepsin L-like [Nasonia vitripennis]	1	4	4	19.9	38.022	1.0639e-63	590220000	45401000
>Cluster-9846.10817;orf1 len=504 frame:3 start:177 end:1688 gi|644995705|ref|XP_008209229.1| PREDICTED: LOW QUALITY PROTEIN: probable citrate synthase 2, mitochondrial [Nasonia vitripennis]	1	12	12	28.6	55.64	3.9404e-34	1158900000	42922000
>Cluster-9846.10838;orf2 len=217 frame:2 start:770 end:1420 gi|345486603|ref|XP_001605356.2| PREDICTED: dual specificity protein phosphatase 15 isoform X1 [Nasonia vitripennis]>gi|644991999|ref|XP_008202743.1| PREDICTED: dual specificity protein phosphatase 15 isoform X1 [Nasonia vitripennis]>gi|644992001|ref|XP_008202744.1| PREDICTED: dual specificity protein phosphatase 15 isoform X1 [Nasonia v…	1	1	1	7.9	24.105	0.00011891	0	0
>Cluster-9846.10844;orf1 len=259 frame:-3 start:1688 end:912 gi|156554120|ref|XP_001603676.1| PREDICTED: pseudouridine-5'-monophosphatase-like isoform X2 [Nasonia vitripennis];>Cluster-9846.7060;orf2 len=247 frame:-1 start:1652 end:912 gi|156554120|ref|XP_001603676.1| PREDICTED: pseudouridine-5'-monophosphatase-like isoform X2 [Nasonia vitripennis];>Cluster-9846.3960;orf1 len=259 frame:-3 start:1…	3	3	3	17.8	29.192	4.9097e-32	108450000	7230200
>Cluster-9846.10856;orf1 len=322 frame:-2 start:1721 end:756 gi|156547253|ref|XP_001601340.1| PREDICTED: lambda-crystallin homolog [Nasonia vitripennis]	1	6	6	29.3	36.032	1.5104e-67	246000000	12300000
>Cluster-9846.10858;orf1 len=379 frame:-2 start:1138 end:2 gi|817060231|ref|XP_012251659.1| PREDICTED: nuclease-sensitive element-binding protein 1 isoform X2 [Athalia rosae];>Cluster-9846.11051;orf1 len=372 frame:-2 start:1239 end:124 gi|817060231|ref|XP_012251659.1| PREDICTED: nuclease-sensitive element-binding protein 1 isoform X2 [Athalia rosae]	2	1	1	4.2	40.163	0.0024587	0	0
>Cluster-9846.10859;orf2 len=686 frame:3 start:3 end:2060 gi|189214178|gb|ACD84945.1| heat shock cognate protein 70 [Macrocentrus cingulum];>Cluster-9846.7151;orf1 len=199 frame:-3 start:597 end:1 gi|645000995|ref|XP_001599773.3| PREDICTED: heat shock protein 68-like [Nasonia vitripennis];>Cluster-9846.1137;orf1 len=248 frame:-2 start:745 end:2 gi|37813097|gb|AAR04339.1| 70 kDa heat shock protein…	8	16	5	32.8	74.723	2.8243e-93	2518400000	76315000
>Cluster-9846.10866;orf1 len=601 frame:2 start:149 end:1951 gi|156554010|ref|XP_001605879.1| PREDICTED: digestive cysteine proteinase 1 [Nasonia vitripennis]>gi|645003015|ref|XP_008208099.1| PREDICTED: digestive cysteine proteinase 1 [Nasonia vitripennis]>gi|645003017|ref|XP_008208100.1| PREDICTED: digestive cysteine proteinase 1 [Nasonia vitripennis]	1	4	4	7.8	68.188	2.6602e-09	227970000	6908000
>Cluster-9846.9220;orf1 len=417 frame:1 start:220 end:1470 gi|156549026|ref|XP_001607355.1| PREDICTED: heterogeneous nuclear ribonucleoprotein A1, A2/B1 homolog isoform X1 [Nasonia vitripennis]>gi|644992627|ref|XP_008202948.1| PREDICTED: heterogeneous nuclear ribonucleoprotein A1, A2/B1 homolog isoform X1 [Nasonia vitripennis];>Cluster-9846.10901;orf1 len=412 frame:1 start:220 end:1455 gi|1565490…	4	2	2	3.8	43.058	0.0019934	51677000	2870900
>Cluster-9846.10908;orf1 len=648 frame:-1 start:3441 end:1498 gi|345494826|ref|XP_001603682.2| PREDICTED: dihydropyrimidinase isoform X1 [Nasonia vitripennis]	1	6	6	12.5	70.552	1.9983e-14	118230000	3694800
>Cluster-9846.10911;orf1 len=724 frame:-3 start:7284 end:5113 gi|766929951|ref|XP_011497090.1| PREDICTED: mitochondrial-processing peptidase subunit beta isoform X1 [Ceratosolen solmsi marchali];>Cluster-9846.7711;orf2 len=689 frame:-1 start:7178 end:5112 gi|645021230|ref|XP_008207498.1| PREDICTED: limulus clotting factor C [Nasonia vitripennis];>Cluster-9846.9577; len=557 start:5518 end:7188; mi…	4	21	21	36.1	79.32	6.0675e-214	3742500000	101150000
>Cluster-9846.10911;orf2 len=483 frame:-1 start:3188 end:1740 gi|766929951|ref|XP_011497090.1| PREDICTED: mitochondrial-processing peptidase subunit beta isoform X1 [Ceratosolen solmsi marchali];>Cluster-9846.12659;orf1 len=483 frame:-1 start:3188 end:1740 gi|766929951|ref|XP_011497090.1| PREDICTED: mitochondrial-processing peptidase subunit beta isoform X1 [Ceratosolen solmsi marchali];>Cluster-…	3	4	4	11.6	54.098	3.1331e-14	172280000	5940600
>Cluster-9846.10924;orf1 len=301 frame:-1 start:5696 end:4794 gi|645011546|ref|XP_008214297.1| PREDICTED: 14-3-3 protein epsilon isoform X1 [Nasonia vitripennis];>Cluster-9846.10934;orf1 len=297 frame:-1 start:5579 end:4689 gi|156553657|ref|XP_001600604.1| PREDICTED: 14-3-3 protein epsilon isoform X2 [Nasonia vitripennis]	2	4	1	16.3	33.804	7.5911e-30	184410000	13172000
>Cluster-9846.10936;orf1 len=446 frame:2 start:428 end:1765 gi|645002582|ref|XP_008207925.1| PREDICTED: synaptotagmin 1 isoform X4 [Nasonia vitripennis];>Cluster-9846.12450;orf1 len=443 frame:3 start:60 end:1388 gi|645002580|ref|XP_008207924.1| PREDICTED: synaptotagmin 1 isoform X3 [Nasonia vitripennis];>Cluster-9846.8999;orf2 len=273 frame:1 start:1492 end:2310 gi|645002582|ref|XP_008207925.1| P…	3	2	2	7.6	49.822	1.6009e-13	38468000	1538700
>Cluster-9846.1094;orf1 len=758 frame:-1 start:2549 end:276 gi|724951806|ref|XP_010351937.1| PREDICTED: LOW QUALITY PROTEIN: heat shock protein HSP 90-alpha [Rhinopithecus roxellana];>Cluster-9846.1095;orf1 len=101 frame:-2 start:303 end:1 gi|675687221|ref|XP_009003691.1| PREDICTED: LOW QUALITY PROTEIN: heat shock protein HSP 90-beta-like [Callithrix jacchus];>Cluster-10088.2;orf1 len=596 frame:1…	5	14	6	24.2	87.028	1.4227e-55	1059000000	29416000
>Cluster-9846.10943;orf1 len=163 frame:3 start:3 end:491 gi|156546383|ref|XP_001606878.1| PREDICTED: 60S ribosomal protein L35a [Nasonia vitripennis]	1	1	1	7.4	18.46	9.9525e-06	143450000	17931000
>Cluster-9846.10951;orf1 len=211 frame:-1 start:1554 end:922 gi|156553185|ref|XP_001600020.1| PREDICTED: protein lethal(2)essential for life [Nasonia vitripennis]>gi|645027410|ref|XP_008214462.1| PREDICTED: protein lethal(2)essential for life [Nasonia vitripennis]>gi|645027412|ref|XP_008214463.1| PREDICTED: protein lethal(2)essential for life [Nasonia vitripennis]>gi|645027414|ref|XP_008214464.1|…	1	2	2	11.4	23.83	2.7738e-30	15270000	1388200
>Cluster-9846.12639;orf1 len=1569 frame:2 start:503 end:5209 gi|645034685|ref|XP_008201955.1| PREDICTED: filamin-A isoform X1 [Nasonia vitripennis];>Cluster-9846.10952;orf1 len=1564 frame:2 start:503 end:5194 gi|345485608|ref|XP_001607090.2| PREDICTED: filamin-A isoform X2 [Nasonia vitripennis]	2	23	23	25.2	169.44	7.6272e-133	1605100000	19339000
>Cluster-9846.10959;orf1 len=611 frame:3 start:171 end:2003 gi|156544736|ref|XP_001605883.1| PREDICTED: lamin Dm0-like isoform X1 [Nasonia vitripennis]>gi|645010530|ref|XP_008213521.1| PREDICTED: lamin Dm0-like isoform X1 [Nasonia vitripennis]>gi|645010532|ref|XP_008213522.1| PREDICTED: lamin Dm0-like isoform X1 [Nasonia vitripennis]	1	2	2	6.2	70.23	5.2429e-08	105910000	2715600
>Cluster-9846.10966;orf1 len=662 frame:-2 start:5317 end:3332 gi|156538601|ref|XP_001607552.1| PREDICTED: uncharacterized family 31 glucosidase KIAA1161 [Nasonia vitripennis]	1	3	3	5	75.812	4.6892e-06	66088000	2002700
>Cluster-9846.10979;orf1 len=238 frame:3 start:399 end:1112 sp|P31402|VATE_MANSE V-type proton ATPase subunit E OS=Manduca sexta GN=VHA26 PE=2 SV=1;>Cluster-5809.0;orf1 len=257 frame:-3 start:1275 end:505 gi|675640355|ref|XP_009004617.1| PREDICTED: V-type proton ATPase subunit E 1 [Callithrix jacchus]	2	7	7	40.1	27.314	2.3325e-35	654300000	54525000
>Cluster-9846.11005;orf1 len=124 frame:-3 start:445 end:74 gi|156545936|ref|XP_001601566.1| PREDICTED: uncharacterized protein LOC100113708 [Nasonia vitripennis]>gi|355389929|emb|CCD17797.1| putative odorant binding protein 28 [Nasonia vitripennis]	1	2	2	29.3	13.979	1.0538e-22	216620000	43325000
>Cluster-9846.11504;orf1 len=449 frame:-1 start:4554 end:3208 gi|645015670|ref|XP_008206561.1| PREDICTED: high mobility group protein DSP1 [Nasonia vitripennis];>Cluster-9846.11021;orf1 len=217 frame:-3 start:3858 end:3208 gi|645015670|ref|XP_008206561.1| PREDICTED: high mobility group protein DSP1 [Nasonia vitripennis]	2	2	2	4.9	50.245	0.00022675	124520000	8301100
>Cluster-9846.11025;orf1 len=118 frame:-1 start:718 end:365 gi|645001161|ref|XP_008209404.1| PREDICTED: glutaredoxin-C4-like isoform X1 [Nasonia vitripennis]	1	2	2	27.4	13.147	4.0832e-26	97319000	16220000
>Cluster-9846.11032;orf1 len=439 frame:-3 start:1574 end:258 gi|156540778|ref|XP_001599305.1| PREDICTED: chitinase-like protein Idgf4 [Nasonia vitripennis]	1	12	12	38.8	48.322	2.86e-45	915170000	50843000
>Cluster-9846.8092;orf1 len=635 frame:-2 start:3449 end:1545 gi|766936292|ref|XP_011500549.1| PREDICTED: lysine--tRNA ligase isoform X1 [Ceratosolen solmsi marchali];>Cluster-9846.11034;orf1 len=632 frame:-1 start:3440 end:1545 gi|766936292|ref|XP_011500549.1| PREDICTED: lysine--tRNA ligase isoform X1 [Ceratosolen solmsi marchali]	2	1	1	2.5	72.347	1.3251e-14	0	0
>Cluster-9846.11036;orf1 len=907 frame:1 start:9568 end:12288 gi|645026448|ref|XP_008213931.1| PREDICTED: paramyosin, long form-like [Nasonia vitripennis];>Cluster-9846.12121;orf1 len=907 frame:2 start:2888 end:5608 gi|645026448|ref|XP_008213931.1| PREDICTED: paramyosin, long form-like [Nasonia vitripennis];>Cluster-9846.12855;orf1 len=907 frame:1 start:9568 end:12288 gi|345481800|ref|XP_00160484…	4	6	6	9.4	105.65	1.8413e-51	214710000	4294100
>Cluster-9846.11039;orf1 len=439 frame:-2 start:4315 end:2999 gi|645002404|ref|XP_008214369.1| PREDICTED: eukaryotic initiation factor 4A-I [Nasonia vitripennis];>Cluster-9846.12656;orf1 len=439 frame:-2 start:3205 end:1889 gi|645002404|ref|XP_008214369.1| PREDICTED: eukaryotic initiation factor 4A-I [Nasonia vitripennis]	2	2	2	4.8	50.114	0.00038483	19952000	767370
>Cluster-9846.11040;orf1 len=131 frame:1 start:1 end:393 gi|156550408|ref|XP_001600105.1| PREDICTED: transketolase isoform X1 [Nasonia vitripennis]	1	2	2	38.5	13.976	5.3893e-14	335700000	47958000
>Cluster-9846.11046;orf1 len=1081 frame:-1 start:4513 end:1271 gi|766932851|ref|XP_011498665.1| PREDICTED: 2-oxoglutarate dehydrogenase, mitochondrial isoform X2 [Ceratosolen solmsi marchali];>Cluster-9846.12615;orf1 len=1029 frame:-1 start:4357 end:1271 gi|229892296|ref|NP_001153501.1| oxoglutarate (alpha-ketoglutarate) dehydrogenase (lipoamide) [Nasonia vitripennis];>Cluster-9846.10224; len=969…	4	18	18	22.5	121.4	1.1133e-64	1298100000	25962000
>Cluster-9846.11052;orf1 len=502 frame:3 start:3 end:1508 gi|645033496|ref|XP_001605967.2| PREDICTED: uncharacterized protein LOC100122362 [Nasonia vitripennis]	1	5	5	13.2	54.338	4.0865e-11	117730000	4204500
>Cluster-9846.11055;orf1 len=260 frame:-3 start:3479 end:2700 gi|156553405|ref|XP_001599521.1| PREDICTED: vesicle-associated membrane protein-associated protein A [Nasonia vitripennis]	1	2	2	10.4	28.854	3.3552e-110	31426000	2095000
>Cluster-9846.11060;orf1 len=516 frame:3 start:177 end:1724 gi|156551115|ref|XP_001603449.1| PREDICTED: retinal dehydrogenase 1-like isoform X1 [Nasonia vitripennis]>gi|645017185|ref|XP_008205483.1| PREDICTED: retinal dehydrogenase 1-like isoform X1 [Nasonia vitripennis]	1	1	1	2.7	55.711	0.00060122	21382000	737320
>Cluster-9846.11067;orf1 len=544 frame:2 start:5231 end:6862 gi|645005333|ref|XP_008217755.1| PREDICTED: V-type proton ATPase subunit H isoform X1 [Nasonia vitripennis];>Cluster-9846.11615;orf1 len=532 frame:2 start:5231 end:6826 gi|795055411|ref|XP_011871508.1| PREDICTED: tyrosine-protein kinase CSK-like isoform X2 [Vollenhovia emeryi];>Cluster-9846.5268;orf1 len=299 frame:3 start:780 end:1676 g…	3	7	7	15.1	62.366	3.3969e-18	279820000	9026500
>Cluster-9846.11070;orf1 len=254 frame:2 start:35 end:796 gi|156546546|ref|XP_001607329.1| PREDICTED: 60S ribosomal protein L13 [Nasonia vitripennis]	1	2	2	7.9	28.948	1.2591e-13	80029000	6156100
>Cluster-9846.11071;orf1 len=382 frame:3 start:78 end:1223 gi|645010282|ref|XP_008213461.1| PREDICTED: synapse-associated protein of 47 kDa isoform X3 [Nasonia vitripennis];>Cluster-9846.11945;orf1 len=378 frame:3 start:78 end:1211 gi|645010285|ref|XP_008213462.1| PREDICTED: synapse-associated protein of 47 kDa isoform X4 [Nasonia vitripennis]	2	1	1	4.5	39.945	0.0032765	37467000	2341700
>Cluster-9846.11093;orf1 len=667 frame:3 start:597 end:2597 gi|766921016|ref|XP_011505006.1| PREDICTED: polyadenylate-binding protein 4-like [Ceratosolen solmsi marchali];>Cluster-9846.21095; len=570 start:496 end:2202; minus strand;>Cluster-20876.0; len=422 start:1 end:1266; minus strand	3	3	3	5.6	74.195	1.4105e-15	0	0
>Cluster-9846.11094;orf1 len=337 frame:2 start:98 end:1108 gi|644992794|ref|XP_008203004.1| PREDICTED: 40S ribosomal protein SA [Nasonia vitripennis]	1	2	2	8.6	36.372	1.7749e-50	67634000	6148500
>Cluster-9846.11099;orf1 len=673 frame:2 start:119 end:2137 gi|645033820|ref|XP_008218132.1| PREDICTED: LOW QUALITY PROTEIN: leupaxin-like [Nasonia vitripennis];>Cluster-9846.4607;orf1 len=619 frame:2 start:365 end:2221 gi|645033820|ref|XP_008218132.1| PREDICTED: LOW QUALITY PROTEIN: leupaxin-like [Nasonia vitripennis];>Cluster-9846.14566;orf1 len=570 frame:2 start:365 end:2074 gi|645033820|ref|X…	4	2	2	6.1	74.222	2.9617e-12	195370000	5141400
>Cluster-9846.12204;orf1 len=1611 frame:-2 start:6772 end:1940 gi|345485875|ref|XP_001603856.2| PREDICTED: uncharacterized protein PF11_0213 isoform X1 [Nasonia vitripennis]>gi|645025734|ref|XP_008202170.1| PREDICTED: uncharacterized protein PF11_0213 isoform X1 [Nasonia vitripennis]>gi|645025736|ref|XP_008202171.1| PREDICTED: uncharacterized protein PF11_0213 isoform X1 [Nasonia vitripennis]>gi|…	8	7	7	5.5	182.24	4.94e-19	205120000	2532300
>Cluster-9846.11107;orf1 len=135 frame:1 start:1 end:405 gi|766937413|ref|XP_011501158.1| PREDICTED: 40S ribosomal protein S25, partial [Ceratosolen solmsi marchali]	1	2	2	14.2	14.894	9.9716e-09	24948000	3564000
>Cluster-9846.11109;orf1 len=561 frame:-1 start:3834 end:2152 gi|269784695|ref|NP_001161449.1| ATP synthase subunit alpha, mitochondrial [Nasonia vitripennis];>Cluster-23407.1; len=246 start:1 end:735; minus strand;>Cluster-19950.0; len=110 start:1 end:327; minus strand;>Cluster-23407.0; len=119 start:41 end:397; minus strand	4	17	8	36.8	60.682	2.0638e-98	6425400000	188980000
>Cluster-9846.11111;orf1 len=289 frame:2 start:326 end:1192 gi|766940789|ref|XP_011503005.1| PREDICTED: PDZ and LIM domain protein Zasp-like [Ceratosolen solmsi marchali]	1	8	1	44.1	30.892	3.154e-60	280970000	16528000
>Cluster-9846.11126;orf1 len=450 frame:1 start:283 end:1632 gi|766937236|ref|XP_011501061.1| PREDICTED: putative ATP-dependent RNA helicase me31b [Ceratosolen solmsi marchali]	1	1	1	3.1	51.267	0.00023114	0	0
>Cluster-9846.11141;orf1 len=215 frame:3 start:30 end:674 gi|345480682|ref|XP_001602474.2| PREDICTED: uncharacterized protein PFB0145c-like [Nasonia vitripennis]	1	10	10	60.3	23.746	1.288e-81	2461900000	175850000
>Cluster-9846.11152;orf1 len=336 frame:2 start:89 end:1096 gi|156547023|ref|XP_001600966.1| PREDICTED: chloride intracellular channel exc-4 [Nasonia vitripennis]	1	1	1	3.6	38.13	0.00029132	17029000	946040
>Cluster-9846.11155;orf1 len=199 frame:1 start:61 end:657 gi|645005564|ref|XP_008217855.1| PREDICTED: 60S ribosomal protein L17 [Nasonia vitripennis]>gi|645005566|ref|XP_008217856.1| PREDICTED: 60S ribosomal protein L17 [Nasonia vitripennis]	1	1	1	5.1	22.884	0.00019353	0	0
>Cluster-9846.11163;orf1 len=498 frame:1 start:181 end:1674 gi|229608897|ref|NP_001153469.1| muscle LIM protein isoform 1 [Nasonia vitripennis];>Cluster-9846.10947;orf1 len=97 frame:1 start:181 end:471 gi|229608897|ref|NP_001153469.1| muscle LIM protein isoform 1 [Nasonia vitripennis]	2	12	12	38.8	53.629	3.2877e-171	2818300000	117430000
>Cluster-9846.11174;orf1 len=509 frame:2 start:314 end:1840 gi|156554573|ref|XP_001600933.1| PREDICTED: 6-phosphogluconate dehydrogenase, decarboxylating [Nasonia vitripennis]	1	6	5	16.5	55.902	2.1166e-20	83001000	3458400
>Cluster-9846.1118;orf1 len=413 frame:3 start:45 end:1283 gi|817219972|ref|XP_012285660.1| PREDICTED: venom acid phosphatase Acph-1-like isoform X2 [Orussus abietinus]>gi|817219975|ref|XP_012285661.1| PREDICTED: venom acid phosphatase Acph-1-like isoform X2 [Orussus abietinus]>gi|817219978|ref|XP_012285662.1| PREDICTED: venom acid phosphatase Acph-1-like isoform X2 [Orussus abietinus];>Cluster-98…	3	21	21	52.4	47.197	1.9552e-194	27189000000	1182100000
>Cluster-9846.11248;orf1 len=351 frame:2 start:41 end:1093 gi|239787140|ref|NP_001155172.1| inosine-uridine preferring nucleoside hydrolase-like precursor [Nasonia vitripennis];>Cluster-9846.14741;orf2 len=351 frame:2 start:41 end:1093 gi|239787140|ref|NP_001155172.1| inosine-uridine preferring nucleoside hydrolase-like precursor [Nasonia vitripennis];>Cluster-9846.15204;orf4 len=351 frame:2 star…	4	15	15	62	38.869	0	13547000000	903110000
>Cluster-9846.11253;orf1 len=725 frame:-1 start:3126 end:952 gi|724951806|ref|XP_010351937.1| PREDICTED: LOW QUALITY PROTEIN: heat shock protein HSP 90-alpha [Rhinopithecus roxellana]	1	7	3	11.5	82.887	8.4328e-19	34030000	1000900
>Cluster-9846.11255;orf1 len=329 frame:-1 start:1202 end:216 gi|645012758|ref|XP_008216463.1| PREDICTED: uncharacterized protein LOC100118265 [Nasonia vitripennis];>Cluster-9846.6941;orf1 len=329 frame:-2 start:1202 end:216 gi|645012758|ref|XP_008216463.1| PREDICTED: uncharacterized protein LOC100118265 [Nasonia vitripennis]	2	2	2	6.1	36.484	3.2982e-10	28631000	2863100
>Cluster-9846.11263; len=209 start:517 end:1144; minus strand;>Cluster-9846.20323;orf1 len=215 frame:3 start:3 end:647 gi|444721520|gb|ELW62253.1| Nucleoside diphosphate kinase B [Tupaia chinensis];>Cluster-9846.20324;orf1 len=161 frame:3 start:51 end:533 gi|79160090|gb|AAI07895.1| NME1-NME2 protein [Homo sapiens]>gi|119614969|gb|EAW94563.1| hCG2001850, isoform CRA_a [Homo sapiens]>gi|649135086|g…	4	6	5	31.2	23.363	4.8731e-23	788570000	60659000
>Cluster-9846.11280;orf1 len=630 frame:2 start:554 end:2443 gi|345498444|ref|XP_001607440.2| PREDICTED: poly(U)-specific endoribonuclease homolog [Nasonia vitripennis]	1	1	1	2.2	66.7	0.001933	11947000	298670
>Cluster-9846.11298;orf1 len=257 frame:-1 start:771 end:1 gi|766921826|ref|XP_011505448.1| PREDICTED: glutamine synthetase 2 cytoplasmic-like [Ceratosolen solmsi marchali]>gi|766921828|ref|XP_011505449.1| PREDICTED: glutamine synthetase 2 cytoplasmic-like [Ceratosolen solmsi marchali]	1	3	3	13.6	28.82	4.838e-09	18159000	1513200
>Cluster-9846.11302;orf1 len=74 frame:-2 start:224 end:3 gi|156550408|ref|XP_001600105.1| PREDICTED: transketolase isoform X1 [Nasonia vitripennis]	1	1	1	12.2	8.1193	0.00032134	29057000	4842800
>Cluster-9846.11304;orf1 len=507 frame:-3 start:1522 end:2 gi|345488771|ref|XP_003425981.1| PREDICTED: transketolase isoform X2 [Nasonia vitripennis]	1	6	6	18.9	55.399	3.5645e-46	397760000	14732000
>Cluster-9846.11337; len=33 start:661 end:758; minus strand	1	1	1	28.1	3.5658	5.1499e-05	977240000	488620000
>Cluster-9846.11346;orf1 len=664 frame:3 start:3 end:1994 gi|345480026|ref|XP_001604951.2| PREDICTED: heat shock protein 68-like [Nasonia vitripennis]	1	4	1	7.5	73.448	8.1525e-20	518720000	15719000
>Cluster-9846.11353;orf1 len=264 frame:3 start:756 end:1547 gi|156542034|ref|XP_001601016.1| PREDICTED: peroxiredoxin 1 [Nasonia vitripennis]>gi|645030705|ref|XP_008213988.1| PREDICTED: peroxiredoxin 1 [Nasonia vitripennis]	1	7	6	39.2	29.736	2.4165e-52	1148400000	67552000
>Cluster-9846.11374;orf2 len=146 frame:2 start:2582 end:3019 gi|766930558|ref|XP_011497423.1| PREDICTED: elastase inhibitor-like [Ceratosolen solmsi marchali];>Cluster-9846.11376;orf1 len=146 frame:1 start:2653 end:3090 gi|766930987|ref|XP_011497654.1| PREDICTED: uncharacterized protein LOC105362027 [Ceratosolen solmsi marchali];>Cluster-9846.3464;orf2 len=146 frame:3 start:2988 end:3425 gi|15655…	4	3	3	21.4	15.812	1.0075e-64	122320000	24465000
>Cluster-9846.11382;orf1 len=316 frame:-3 start:1144 end:197 gi|345485899|ref|XP_003425364.1| PREDICTED: 1,5-anhydro-D-fructose reductase-like [Nasonia vitripennis]	1	1	1	4.1	35.619	0.0024299	0	0
>Cluster-9846.11390; len=584 start:1546 end:3297; minus strand;>Cluster-13976.0;orf1 len=450 frame:3 start:153 end:1502 gi|226347407|gb|ACO50114.1| elongation factor 1 alpha [Malawimonas californiana];>Cluster-9846.8961; len=296 start:1 end:885; minus strand;>Cluster-11829.0; len=181 start:1 end:540; minus strand;>Cluster-9846.20589; len=411 start:1 end:1230; minus strand;>Cluster-22233.4; len=24…	25	12	7	30	63.491	1.0115e-135	6245800000	231330000
>Cluster-9846.11441;orf1 len=496 frame:3 start:3 end:1490 gi|645034258|ref|XP_008201837.1| PREDICTED: antichymotrypsin-2 isoform X8 [Nasonia vitripennis];>Cluster-9846.11440;orf1 len=498 frame:3 start:3 end:1496 gi|645034240|ref|XP_008201830.1| PREDICTED: alaserpin isoform X2 [Nasonia vitripennis];>Cluster-9846.8976;orf1 len=496 frame:3 start:3 end:1490 gi|645034255|ref|XP_008201836.1| PREDICTED:…	6	14	1	34.9	55.226	7.4104e-198	24956000	1039900
>Cluster-9846.11444;orf1 len=380 frame:-3 start:5869 end:4730 gi|645028958|ref|XP_008205614.1| PREDICTED: heterogeneous nuclear ribonucleoprotein 27C isoform X1 [Nasonia vitripennis]	1	2	2	8.7	41.145	1.5499e-08	41557000	3463100
>Cluster-9846.11445;orf1 len=742 frame:-2 start:4758 end:2533 gi|345485415|ref|XP_001605609.2| PREDICTED: eukaryotic peptide chain release factor GTP-binding subunit ERF3A isoform X1 [Nasonia vitripennis];>Cluster-9846.11921;orf1 len=639 frame:-2 start:4449 end:2533 gi|345485417|ref|XP_003425265.1| PREDICTED: eukaryotic peptide chain release factor GTP-binding subunit ERF3A isoform X2 [Nasonia vi…	2	1	1	2.2	80.551	0.0037264	9847100	307720
>Cluster-9846.11450;orf1 len=355 frame:1 start:1 end:1065 gi|768429009|ref|XP_011555667.1| PREDICTED: 60S acidic ribosomal protein P0 [Plutella xylostella]	1	2	2	12.1	38.266	4.0317e-24	100060000	7696500
>Cluster-9846.11475;orf1 len=104 frame:-3 start:1852 end:1541 gi|759076391|ref|XP_011347927.1| PREDICTED: dynein light chain 2, cytoplasmic isoform X1 [Cerapachys biroi]	1	2	2	32	12.033	1.862e-28	104110000	20822000
>Cluster-9846.11477;orf1 len=928 frame:-3 start:5582 end:2799 gi|229577219|ref|NP_001153329.1| tudor staphylococcus/micrococcal nuclease [Nasonia vitripennis]>gi|645022274|ref|XP_008211060.1| PREDICTED: tudor staphylococcus/micrococcal nuclease isoform X1 [Nasonia vitripennis]>gi|645022277|ref|XP_008211066.1| PREDICTED: tudor staphylococcus/micrococcal nuclease isoform X1 [Nasonia vitripennis]	1	8	8	11.4	103.61	2.1204e-25	440350000	8308500
>Cluster-9846.11484;orf2 len=658 frame:1 start:6658 end:8631 gi|645025675|ref|XP_008202142.1| PREDICTED: probable ADP-ribosylation factor GTPase-activating protein AGD5 isoform X3 [Nasonia vitripennis]	1	1	1	2.3	74.871	0.0099134	8071400	196860
>Cluster-9846.11488;orf1 len=209 frame:-3 start:1018 end:392 gi|156536931|ref|XP_001608129.1| PREDICTED: 40S ribosomal protein S7 isoform X2 [Nasonia vitripennis]>gi|345479585|ref|XP_003423985.1| PREDICTED: 40S ribosomal protein S7 isoform X2 [Nasonia vitripennis]>gi|152940811|gb|ABS44870.1| ribosomal protein S7e [Pteromalus puparum]	1	1	1	13	24.012	5.0822e-06	16319000	1483600
>Cluster-9846.11506;orf1 len=264 frame:-1 start:1819 end:1028 gi|766924610|ref|XP_011494157.1| PREDICTED: proteasome subunit alpha type-6-like [Ceratosolen solmsi marchali];>Cluster-10957.0;orf1 len=261 frame:-1 start:838 end:56 gi|597778798|ref|XP_007253022.1| PREDICTED: proteasome subunit alpha type-6-like isoform X2 [Astyanax mexicanus];>Cluster-9846.20471; len=167 start:498 end:996; minus str…	4	4	4	17.1	29.231	7.8853e-11	117190000	5859700
>Cluster-9846.11526;orf1 len=118 frame:2 start:86 end:439 gi|665814655|ref|XP_008555948.1| PREDICTED: 60S ribosomal protein L30 isoform X1 [Microplitis demolitor];>Cluster-9846.11527;orf1 len=67 frame:2 start:164 end:364 gi|746850140|ref|XP_011055537.1| PREDICTED: 60S ribosomal protein L30 [Acromyrmex echinatior]>gi|751200024|ref|XP_011160005.1| PREDICTED: 60S ribosomal protein L30 [Solenopsis in…	2	2	2	23.9	12.908	3.4936e-07	70383000	11730000
>Cluster-9846.11528;orf1 len=528 frame:-3 start:1834 end:251 gi|156550877|ref|XP_001602184.1| PREDICTED: alpha-amylase-like [Nasonia vitripennis]>gi|645013646|ref|XP_008205202.1| PREDICTED: alpha-amylase-like [Nasonia vitripennis]>gi|645013648|ref|XP_008205203.1| PREDICTED: alpha-amylase-like [Nasonia vitripennis];>Cluster-22976.0;orf1 len=525 frame:-2 start:1658 end:84 gi|645006967|ref|XP_001606…	2	18	18	47.4	58.698	2.8785e-239	13477000000	518350000
>Cluster-9846.11948;orf1 len=397 frame:-3 start:2795 end:1605 gi|665794151|ref|XP_008544759.1| PREDICTED: arginine kinase isoform X1 [Microplitis demolitor];>Cluster-9846.11534;orf1 len=382 frame:-1 start:2750 end:1605 gi|665794151|ref|XP_008544759.1| PREDICTED: arginine kinase isoform X1 [Microplitis demolitor]	2	16	16	49	44.075	6.069e-116	3722200000	169190000
>Cluster-9846.11539;orf2 len=477 frame:-3 start:2040 end:610 gi|645015478|ref|XP_003426353.2| PREDICTED: enolase isoform X1 [Nasonia vitripennis]	1	11	11	34.2	51.884	8.4887e-36	2117700000	88237000
>Cluster-9846.11583;orf1 len=126 frame:3 start:1536 end:1913 gi|765333918|ref|XP_011492963.1| AAEL017356-PA [Aedes aegypti]>gi|403182447|gb|EJY57394.1| AAEL017356-PA [Aedes aegypti]	1	2	2	25.6	13.421	1.7802e-82	5203800000	743390000
>Cluster-9846.11613;orf1 len=147 frame:3 start:192 end:632 gi|156550773|ref|XP_001605596.1| PREDICTED: small nuclear ribonucleoprotein Sm D3 [Nasonia vitripennis]	1	1	1	6.8	15.933	2.6387e-06	0	0
>Cluster-9846.11638;orf1 len=792 frame:2 start:251 end:2626 gi|644999950|ref|XP_008215781.1| PREDICTED: probable aconitate hydratase, mitochondrial isoform X1 [Nasonia vitripennis];>Cluster-13637.0; len=291 start:1 end:873; minus strand;>Cluster-10665.1; len=268 start:1 end:801; minus strand;>Cluster-14613.0; len=224 start:1 end:672; minus strand	4	21	21	37.7	85.658	4.4462e-240	3468300000	99094000
>Cluster-9846.11651;orf1 len=724 frame:2 start:2 end:2173 gi|345489283|ref|XP_001599525.2| PREDICTED: heat shock 70 kDa protein cognate 5 [Nasonia vitripennis]>gi|645023426|ref|XP_008205358.1| PREDICTED: heat shock 70 kDa protein cognate 5 [Nasonia vitripennis];>Cluster-22044.0;orf1 len=186 frame:1 start:1 end:558 gi|733908557|ref|XP_010717168.1| PREDICTED: stress-70 protein, mitochondrial [Melea…	2	9	7	16	78.85	5.2682e-32	437700000	10421000
>Cluster-9846.12019;orf1 len=473 frame:2 start:296 end:1714 gi|345485566|ref|XP_003425295.1| PREDICTED: amphiphysin isoform X1 [Nasonia vitripennis];>Cluster-9846.11657;orf1 len=461 frame:3 start:288 end:1670 gi|345485568|ref|XP_001606930.2| PREDICTED: myc box-dependent-interacting protein 1 isoform X2 [Nasonia vitripennis];>Cluster-9846.11662;orf1 len=461 frame:2 start:341 end:1723 gi|345485568|…	5	5	5	14.2	52.954	4.4019e-20	157370000	8282400
>Cluster-9846.9887;orf1 len=551 frame:1 start:202 end:1854 gi|766928552|ref|XP_011496324.1| PREDICTED: pyruvate kinase-like [Ceratosolen solmsi marchali];>Cluster-9846.11666;orf1 len=539 frame:1 start:202 end:1818 gi|766928552|ref|XP_011496324.1| PREDICTED: pyruvate kinase-like [Ceratosolen solmsi marchali]	2	12	12	30.4	59.519	7.9249e-80	1084100000	37383000
>Cluster-9846.16785;orf1 len=543 frame:-3 start:4692 end:3064 gi|645025648|ref|XP_008202130.1| PREDICTED: thioredoxin reductase 2, mitochondrial isoform X1 [Nasonia vitripennis];>Cluster-9846.9104;orf1 len=543 frame:-1 start:4692 end:3064 gi|645025648|ref|XP_008202130.1| PREDICTED: thioredoxin reductase 2, mitochondrial isoform X1 [Nasonia vitripennis];>Cluster-9846.11667;orf1 len=497 frame:-2 st…	3	8	8	17.5	59.248	1.5965e-20	368390000	16017000
>Cluster-9846.11668;orf1 len=307 frame:-3 start:1005 end:85 gi|229577209|ref|NP_001153326.1| ribosomal protein L7A [Nasonia vitripennis]	1	3	3	12.7	34.312	3.9578e-10	83033000	7548500
>Cluster-9846.11678;orf1 len=556 frame:-1 start:4164 end:2497 gi|645000459|ref|XP_008215991.1| PREDICTED: T-complex protein 1 subunit theta [Nasonia vitripennis]	1	3	3	7.6	60.216	1.5384e-07	34642000	936270
>Cluster-9846.11721;orf1 len=149 frame:-1 start:698 end:252 gi|66558956|ref|XP_392812.2| PREDICTED: 60S ribosomal protein L23 [Apis mellifera]>gi|156545547|ref|XP_001605069.1| PREDICTED: 60S ribosomal protein L23 [Nasonia vitripennis]>gi|380028209|ref|XP_003697800.1| PREDICTED: 60S ribosomal protein L23 [Apis florea]>gi|383854692|ref|XP_003702854.1| PREDICTED: 60S ribosomal protein L23 [Megachile…	3	3	3	29.1	15.712	1.588e-10	208920000	23214000
>Cluster-9846.11727;orf1 len=675 frame:-3 start:3006 end:982 gi|156545557|ref|XP_001606463.1| PREDICTED: heat shock 70 kDa protein cognate 3 isoform X1 [Nasonia vitripennis]>gi|645012843|ref|XP_008216495.1| PREDICTED: heat shock 70 kDa protein cognate 3 isoform X1 [Nasonia vitripennis]>gi|645012845|ref|XP_008216496.1| PREDICTED: heat shock 70 kDa protein cognate 3 isoform X1 [Nasonia vitripennis]…	2	10	6	17.8	74.55	6.4244e-67	578410000	18075000
>Cluster-9846.11732;orf1 len=272 frame:3 start:468 end:1283 gi|645002938|ref|XP_008208069.1| PREDICTED: ras-related protein Rab-5B isoform X1 [Nasonia vitripennis]>gi|645002940|ref|XP_008208070.1| PREDICTED: ras-related protein Rab-5B isoform X1 [Nasonia vitripennis]>gi|645002942|ref|XP_008208071.1| PREDICTED: ras-related protein Rab-5B isoform X1 [Nasonia vitripennis];>Cluster-9846.7457;orf1 len…	5	2	2	9.2	29.851	1.5427e-12	15823000	988910
>Cluster-9846.433;orf1 len=424 frame:2 start:2 end:1273 gi|532076174|ref|XP_005323882.1| PREDICTED: fructose-bisphosphate aldolase A isoform X3 [Ictidomys tridecemlineatus];>Cluster-9846.1174;orf1 len=417 frame:3 start:24 end:1274 gi|532076174|ref|XP_005323882.1| PREDICTED: fructose-bisphosphate aldolase A isoform X3 [Ictidomys tridecemlineatus];>Cluster-17062.0;orf1 len=281 frame:-3 start:843 en…	4	7	7	30.7	46.159	1.3074e-29	273930000	10957000
>Cluster-9846.11742;orf1 len=441 frame:-1 start:2130 end:808 gi|766921830|ref|XP_011505450.1| PREDICTED: glutamine synthetase 2 cytoplasmic-like [Ceratosolen solmsi marchali]	1	6	1	17	48.974	8.7448e-23	154180000	7008300
>Cluster-9846.11743;orf1 len=289 frame:3 start:3 end:869 gi|156551529|ref|XP_001601315.1| PREDICTED: 40S ribosomal protein S3a [Nasonia vitripennis]	1	7	7	29.5	32.129	4.405e-24	190250000	10013000
>Cluster-9846.11757;orf1 len=336 frame:1 start:430 end:1437 gi|645021142|ref|XP_008207472.1| PREDICTED: tumor protein D54 isoform X1 [Nasonia vitripennis];>Cluster-9846.11758;orf1 len=230 frame:1 start:223 end:912 gi|645021148|ref|XP_008207474.1| PREDICTED: tumor protein D54 isoform X3 [Nasonia vitripennis]	2	1	1	2.7	36.973	0.011914	0	0
>Cluster-9846.11765;orf1 len=523 frame:2 start:290 end:1858 gi|345495697|ref|XP_003427555.1| PREDICTED: UTP--glucose-1-phosphate uridylyltransferase isoform X1 [Nasonia vitripennis];>Cluster-9846.9786;orf1 len=518 frame:1 start:325 end:1878 gi|156543768|ref|XP_001606199.1| PREDICTED: UTP--glucose-1-phosphate uridylyltransferase isoform X2 [Nasonia vitripennis]	2	4	4	10.2	58.902	3.2078e-19	183660000	5401700
>Cluster-9846.1178;orf1 len=584 frame:2 start:2 end:1753 gi|345480945|ref|XP_003424252.1| PREDICTED: uncharacterized protein LOC100680511 [Nasonia vitripennis];>Cluster-9846.2120;orf1 len=584 frame:2 start:2 end:1753 gi|345480945|ref|XP_003424252.1| PREDICTED: uncharacterized protein LOC100680511 [Nasonia vitripennis]	2	15	13	31.2	67.617	7.3862e-139	3686300000	131650000
>Cluster-9846.9646;orf1 len=607 frame:3 start:156 end:1976 gi|645028397|ref|XP_008208380.1| PREDICTED: xaa-Pro dipeptidase [Nasonia vitripennis];>Cluster-9846.11787;orf1 len=528 frame:1 start:304 end:1887 gi|645028397|ref|XP_008208380.1| PREDICTED: xaa-Pro dipeptidase [Nasonia vitripennis];>Cluster-9846.4983;orf1 len=502 frame:1 start:772 end:2277 gi|645028397|ref|XP_008208380.1| PREDICTED: xaa-P…	3	2	2	3.3	66.764	0.00047993	7900200	292600
>Cluster-9846.11811;orf1 len=221 frame:-1 start:743 end:81 gi|817184810|ref|XP_012283483.1| PREDICTED: 60S ribosomal protein L11 isoform X1 [Orussus abietinus]	1	1	1	6.4	24.806	0.00060734	34499000	3833200
>Cluster-9846.8528;orf1 len=1120 frame:3 start:2808 end:6167 gi|645033198|ref|XP_008214918.1| PREDICTED: ribosome-binding protein 1 isoform X3 [Nasonia vitripennis];>Cluster-9846.11820;orf3 len=1109 frame:3 start:2808 end:6134 gi|645033205|ref|XP_008214920.1| PREDICTED: kinectin isoform X5 [Nasonia vitripennis];>Cluster-9846.12872;orf1 len=1109 frame:3 start:2808 end:6134 gi|345498399|ref|XP_0034…	4	1	1	1.2	127.93	3.2664e-05	10704000	167260
>Cluster-9846.11825;orf1 len=334 frame:-2 start:2228 end:1227 gi|644991612|ref|XP_008202619.1| PREDICTED: RNA-binding protein squid-like isoform X2 [Nasonia vitripennis];>Cluster-9846.11823;orf1 len=290 frame:-2 start:1246 end:377 gi|644991612|ref|XP_008202619.1| PREDICTED: RNA-binding protein squid-like isoform X2 [Nasonia vitripennis]	2	2	2	9	37.39	3.2526e-35	215790000	14386000
>Cluster-9846.11860;orf1 len=213 frame:1 start:97 end:735 gi|645034797|ref|XP_008201977.1| PREDICTED: myophilin [Nasonia vitripennis]	1	4	4	22.2	23.878	1.952e-16	736530000	49102000
>Cluster-9846.12502;orf1 len=1683 frame:1 start:1297 end:6345 gi|645035636|ref|XP_008216783.1| PREDICTED: serine/arginine repetitive matrix protein 2 isoform X2 [Nasonia vitripennis];>Cluster-9846.15720;orf2 len=1457 frame:1 start:1297 end:5667 gi|645035643|ref|XP_008216786.1| PREDICTED: serine/arginine repetitive matrix protein 2 isoform X5 [Nasonia vitripennis];>Cluster-9846.11873;orf2 len=1450…	6	2	2	2.1	187.9	7.3071e-06	25671000	298500
>Cluster-9846.11905;orf1 len=266 frame:3 start:60 end:857 gi|340720134|ref|XP_003398498.1| PREDICTED: 40S ribosomal protein S4 isoform X1 [Bombus terrestris]>gi|340720136|ref|XP_003398499.1| PREDICTED: 40S ribosomal protein S4 isoform X2 [Bombus terrestris]>gi|350408329|ref|XP_003488370.1| PREDICTED: 40S ribosomal protein S4 isoform X2 [Bombus impatiens]>gi|350408333|ref|XP_003488371.1| PREDICTED…	1	2	2	8.7	29.905	2.1837e-05	35240000	2202500
>Cluster-9846.11944;orf1 len=116 frame:-2 start:625 end:278 gi|645031105|ref|XP_008210047.1| PREDICTED: ATPase inhibitor mai-2, mitochondrial-like isoform X2 [Nasonia vitripennis]	1	2	2	26.1	13.06	9.5889e-24	148350000	14835000
>Cluster-9846.8747;orf1 len=415 frame:-2 start:2412 end:1168 gi|283046759|ref|NP_001164327.1| fructose-bisphosphate aldolase isoform B [Nasonia vitripennis];>Cluster-9846.11946;orf1 len=414 frame:-2 start:2246 end:1005 gi|283046761|ref|NP_001164328.1| fructose-bisphosphate aldolase isoform A [Nasonia vitripennis]	2	17	17	57.5	44.979	6.776e-198	3833100000	153320000
>Cluster-9846.11966;orf1 len=2428 frame:-1 start:7903 end:620 gi|156553897|ref|XP_001601352.1| PREDICTED: spectrin alpha chain [Nasonia vitripennis];>Cluster-9846.12071;orf1 len=2428 frame:-1 start:7903 end:620 gi|156553897|ref|XP_001601352.1| PREDICTED: spectrin alpha chain [Nasonia vitripennis];>Cluster-9846.13087;orf1 len=2428 frame:-1 start:7903 end:620 gi|156553897|ref|XP_001601352.1| PREDIC…	4	4	4	2.2	278.95	2.5166e-10	27004000	187530
>Cluster-9846.12005;orf1 len=505 frame:3 start:243 end:1757 gi|766921326|ref|XP_011505178.1| PREDICTED: V-type proton ATPase subunit B [Ceratosolen solmsi marchali];>Cluster-9417.0; len=194 start:13 end:594; minus strand;>Cluster-19839.1; len=308 start:1 end:923; minus strand;>Cluster-10356.1;orf1 len=257 frame:1 start:1 end:771 gi|156389078|ref|XP_001634819.1| predicted protein [Nematostella vec…	5	13	13	41.5	56.111	1.5948e-69	678090000	25114000
>Cluster-9846.12034;orf1 len=439 frame:-3 start:1666 end:350 gi|645005010|ref|XP_001602620.2| PREDICTED: gastric triacylglycerol lipase-like [Nasonia vitripennis];>Cluster-9846.13212;orf1 len=439 frame:-3 start:1666 end:350 gi|645005010|ref|XP_001602620.2| PREDICTED: gastric triacylglycerol lipase-like [Nasonia vitripennis];>Cluster-9846.8605;orf1 len=439 frame:-1 start:1666 end:350 gi|645005010|…	6	8	8	21.9	50.059	3.2966e-85	344850000	16421000
>Cluster-9846.12047;orf1 len=532 frame:-2 start:2933 end:1338 gi|645014157|ref|XP_008203359.1| PREDICTED: eukaryotic translation initiation factor 4B [Nasonia vitripennis]	1	1	1	2.1	60.44	0.0025197	0	0
>Cluster-9846.12069;orf1 len=394 frame:-1 start:4479 end:3298 gi|645016205|ref|XP_008211381.1| PREDICTED: uncharacterized oxidoreductase C115.03-like [Nasonia vitripennis]	1	5	5	15.5	44.333	7.5146e-17	178050000	6848300
>Cluster-9846.18157;orf1 len=611 frame:3 start:564 end:2396 gi|156545944|ref|XP_001603380.1| PREDICTED: putative aminopeptidase W07G4.4 isoform X2 [Nasonia vitripennis];>Cluster-9846.12088;orf1 len=534 frame:3 start:426 end:2027 gi|156545944|ref|XP_001603380.1| PREDICTED: putative aminopeptidase W07G4.4 isoform X2 [Nasonia vitripennis]	2	2	2	3.8	65.63	0.00098362	24251000	655440
>Cluster-9846.12093;orf1 len=3222 frame:3 start:3 end:9668 gi|644992712|ref|XP_008202978.1| PREDICTED: twitchin [Nasonia vitripennis]	1	18	18	8.4	359.67	7.6106e-109	676600000	3933700
>Cluster-9846.12098;orf1 len=431 frame:1 start:259 end:1551 gi|156554114|ref|XP_001601087.1| PREDICTED: cAMP-dependent protein kinase type II regulatory subunit [Nasonia vitripennis]>gi|345492828|ref|XP_003426935.1| PREDICTED: cAMP-dependent protein kinase type II regulatory subunit [Nasonia vitripennis]>gi|345492831|ref|XP_003426936.1| PREDICTED: cAMP-dependent protein kinase type II regulatory …	2	1	1	4	48.454	0.0009604	0	0
>Cluster-9846.12122;orf1 len=535 frame:2 start:2 end:1606 gi|229577383|ref|NP_001153366.1| ATP synthase subunit beta, mitochondrial [Nasonia vitripennis];>Cluster-21298.0;orf1 len=575 frame:2 start:890 end:2614 gi|768401058|ref|XP_011596458.1| PREDICTED: ATP synthase subunit beta, mitochondrial [Aquila chrysaetos canadensis];>Cluster-9846.21706; len=368 start:1 end:1102; minus strand;>Cluster-630…	6	24	18	69.5	56.985	3.76e-245	12092000000	416970000
>Cluster-9846.12176;orf1 len=437 frame:2 start:194 end:1504 gi|239049675|ref|NP_001155060.1| serine protease homolog 21 precursor [Nasonia vitripennis]	1	15	15	38.8	47.337	2.9799e-222	9271200000	441480000
>Cluster-9846.12184;orf1 len=384 frame:-2 start:1240 end:89 gi|820857060|ref|XP_012345672.1| PREDICTED: actin, clone 205-like isoform X1 [Apis florea];>Cluster-10980.4;orf1 len=379 frame:3 start:183 end:1319 gi|28374049|pdb|1NLV|A Chain A, Crystal Structure Of Dictyostelium Discoideum Actin Complexed With Ca Atp And Human Gelsolin Segment 1>gi|28374073|pdb|1NM1|A Chain A, Crystal Structure Of D. …	14	18	2	59	42.62	6.3113e-231	809740000	40487000
>Cluster-9846.12195;orf1 len=107 frame:1 start:118 end:438 gi|288856333|ref|NP_001165817.1| ATP synthase-coupling factor 6, mitochondrial [Nasonia vitripennis]	1	1	1	11.3	11.883	0.00084354	34486000	4926500
>Cluster-9846.9313;orf1 len=2332 frame:1 start:421 end:7416 gi|645006304|ref|XP_008204417.1| PREDICTED: microtubule-associated protein futsch-like [Nasonia vitripennis];>Cluster-9846.12244;orf1 len=2297 frame:1 start:421 end:7311 gi|645006304|ref|XP_008204417.1| PREDICTED: microtubule-associated protein futsch-like [Nasonia vitripennis];>Cluster-9846.17667;orf1 len=1468 frame:3 start:1083 end:548…	6	11	11	5.6	256.02	2.533e-49	517530000	3920700
>Cluster-9846.12248;orf1 len=268 frame:3 start:132 end:935 gi|345497959|ref|XP_001602648.2| PREDICTED: phosphoglycerate mutase 2 [Nasonia vitripennis]	1	3	3	13.9	30.156	4.2841e-11	155920000	11137000
>Cluster-9846.1227;orf1 len=108 frame:2 start:8 end:331 gi|119389962|pdb|2HUE|C Chain C, Structure Of The H3-h4 Chaperone Asf1 Bound To Histones H3 And H4>gi|304446003|pdb|3NQJ|B Chain B, Crystal Structure Of (Cenp-AH4)2 HETEROTETRAMER>gi|887492817|pdb|4ZBJ|C Chain C, Ubn1 Peptide Bound To H3.3/h4/asf1;>Cluster-9846.7092;orf1 len=106 frame:-3 start:773 end:456 gi|119389962|pdb|2HUE|C Chain C, Str…	8	5	5	48.6	11.736	9.046e-20	1144700000	163530000
>Cluster-9846.12290;orf1 len=473 frame:-2 start:3039 end:1621 gi|345483324|ref|XP_003424792.1| PREDICTED: venom serine carboxypeptidase isoform X1 [Nasonia vitripennis]	1	2	2	4.7	53.925	4.3593e-05	84896000	4716400
>Cluster-9846.12301;orf1 len=455 frame:-3 start:14061 end:12697 gi|766918163|ref|XP_011496788.1| PREDICTED: tropomodulin isoform X3 [Ceratosolen solmsi marchali];>Cluster-9846.12297;orf1 len=375 frame:-3 start:13820 end:12696 gi|607367787|gb|EZA61919.1| Tropomodulin [Cerapachys biroi]	2	3	3	11.7	51.42	3.1865e-15	160930000	8046700
>Cluster-9846.12306;orf1 len=428 frame:2 start:2825 end:4108 gi|156545402|ref|XP_001606445.1| PREDICTED: leukocyte receptor cluster member 8 homolog isoform X2 [Nasonia vitripennis];>Cluster-9846.12394;orf1 len=428 frame:1 start:2764 end:4047 gi|766930771|ref|XP_011497536.1| PREDICTED: cAMP-dependent protein kinase type I regulatory subunit [Ceratosolen solmsi marchali];>Cluster-9846.13113;orf2 l…	5	4	4	13.6	47.776	8.5925e-10	202980000	10149000
>Cluster-9846.12316;orf1 len=264 frame:1 start:1600 end:2391 gi|645011635|ref|XP_001601301.2| PREDICTED: peroxisomal hydratase-dehydrogenase-epimerase [Nasonia vitripennis];>Cluster-9846.14823;orf1 len=264 frame:1 start:1579 end:2370 gi|645011635|ref|XP_001601301.2| PREDICTED: peroxisomal hydratase-dehydrogenase-epimerase [Nasonia vitripennis];>Cluster-9846.7516;orf1 len=266 frame:2 start:2 end:7…	3	7	7	39.5	28.131	4.2137e-39	174560000	10268000
>Cluster-9846.12325;orf1 len=131 frame:1 start:313 end:705 gi|769835718|ref|XP_011647975.1| PREDICTED: LOW QUALITY PROTEIN: protein translation factor SUI1 homolog [Pogonomyrmex barbatus]	1	2	2	22.3	14.759	0.00078542	33334000	4761900
>Cluster-9846.12337;orf1 len=179 frame:2 start:83 end:619 gi|766918429|ref|XP_011498299.1| PREDICTED: myosin light chain alkali isoform X2 [Ceratosolen solmsi marchali]	1	7	7	52.8	19.973	9.5072e-186	2313900000	257100000
>Cluster-9846.12411;orf1 len=333 frame:3 start:327 end:1325 gi|345490385|ref|XP_001607801.2| PREDICTED: calumenin [Nasonia vitripennis]	1	2	2	9.3	38.92	1.5767e-06	58783000	2939100
>Cluster-9846.12425;orf1 len=332 frame:3 start:243 end:1238 gi|345485911|ref|XP_001604204.2| PREDICTED: 1,5-anhydro-D-fructose reductase-like [Nasonia vitripennis];>Cluster-9846.15820;orf1 len=332 frame:3 start:243 end:1238 gi|345485903|ref|XP_001603938.2| PREDICTED: aldo-keto reductase AKR2E4-like [Nasonia vitripennis]>gi|345485905|ref|XP_003425366.1| PREDICTED: aldo-keto reductase AKR2E4-like […	2	3	3	11.2	37.318	8.3424e-08	95327000	3813100
>Cluster-9846.12425;orf2 len=326 frame:2 start:1925 end:2902 gi|345485911|ref|XP_001604204.2| PREDICTED: 1,5-anhydro-D-fructose reductase-like [Nasonia vitripennis]	1	3	3	11.4	36.924	2.5384e-07	24871000	1036300
>Cluster-9846.12446;orf1 len=358 frame:3 start:183 end:1256 gi|156542373|ref|XP_001602406.1| PREDICTED: 1,5-anhydro-D-fructose reductase-like isoform X1 [Nasonia vitripennis];>Cluster-19655.1;orf1 len=370 frame:3 start:3 end:1112 gi|156538066|ref|XP_001607479.1| PREDICTED: alcohol dehydrogenase [NADP(+)]-like [Nasonia vitripennis];>Cluster-9846.3301;orf1 len=369 frame:2 start:101 end:1207 gi|6450…	8	11	11	43.1	40.071	1.6308e-79	799760000	36353000
>Cluster-9846.12541;orf1 len=563 frame:2 start:164 end:1852 gi|156548992|ref|XP_001607265.1| PREDICTED: glutamate dehydrogenase, mitochondrial [Nasonia vitripennis]	1	13	13	32	61.915	2.1195e-33	707640000	20813000
>Cluster-9846.12581;orf1 len=206 frame:-1 start:904 end:287 gi|156548617|ref|XP_001608151.1| PREDICTED: adenylate kinase isoenzyme 1 [Nasonia vitripennis]>gi|644992878|ref|XP_008203030.1| PREDICTED: adenylate kinase isoenzyme 1 [Nasonia vitripennis]	1	4	4	22.9	22.462	6.5735e-11	211830000	15131000
>Cluster-9846.12603;orf1 len=161 frame:1 start:76 end:558 gi|156554296|ref|XP_001602465.1| PREDICTED: 40S ribosomal protein S14 [Nasonia vitripennis]>gi|645027100|ref|XP_008208988.1| PREDICTED: 40S ribosomal protein S14 [Nasonia vitripennis]>gi|152940797|gb|ABS44863.1| putative ribosomal protein S14 [Oryza sativa Japonica Group];>Cluster-2290.0;orf1 len=166 frame:-1 start:546 end:49 gi|602654012|…	6	4	4	28.8	17.355	1.9048e-13	344510000	49215000
>Cluster-9846.12619;orf1 len=172 frame:3 start:144 end:659 gi|156545934|ref|XP_001601182.1| PREDICTED: general odorant-binding protein 28a [Nasonia vitripennis]>gi|355389925|emb|CCD17795.1| putative odorant binding protein 26 [Nasonia vitripennis]	1	6	6	39.2	18.443	1.1564e-26	4900500000	490050000
>Cluster-9846.20748; len=141 start:36 end:456; minus strand;>Cluster-9846.802; len=141 start:36 end:456; minus strand;>Cluster-9846.12626; len=130 start:71 end:458; minus strand	3	1	1	5	16.14	0.0080689	52921000	10584000
>Cluster-9846.12647;orf1 len=659 frame:2 start:395 end:2371 gi|345495717|ref|XP_001606306.2| PREDICTED: nucleolar and coiled-body phosphoprotein 1 isoform X2 [Nasonia vitripennis];>Cluster-9846.14347;orf1 len=401 frame:2 start:395 end:1597 gi|345495717|ref|XP_001606306.2| PREDICTED: nucleolar and coiled-body phosphoprotein 1 isoform X2 [Nasonia vitripennis]	2	3	3	7.3	74.048	1.0412e-16	51032000	2126300
>Cluster-9846.12672;orf2 len=3219 frame:-3 start:19775 end:10119 gi|645016699|ref|XP_008211586.1| PREDICTED: nesprin-1 [Nasonia vitripennis];>Cluster-9846.11090; len=2327 start:17427 end:24402; minus strand;>Cluster-9846.19012; len=106 start:805 end:1121; minus strand	3	3	3	1.2	367.18	5.5984e-07	16564000	101000
>Cluster-9846.12704;orf1 len=559 frame:1 start:190 end:1866 gi|766919093|ref|XP_011502115.1| PREDICTED: serine/threonine-protein phosphatase 6 regulatory ankyrin repeat subunit B-like [Ceratosolen solmsi marchali]	1	1	1	2.5	63.766	0.0063853	255040000	7286700
>Cluster-9846.12724;orf1 len=737 frame:-2 start:2717 end:507 gi|699979710|gb|AIU47031.1| heat shock protein [Phenacoccus solenopsis];>Cluster-21524.0;orf1 len=737 frame:-2 start:2398 end:188 gi|161899185|ref|XP_001712819.1| chaperone HSP90 [Bigelowiella natans]>gi|75756312|gb|ABA27207.1| chaperone HSP90 [Bigelowiella natans]	2	7	0	11.5	85.143	8.1344e-26	215380000	6153600
>Cluster-9846.12757;orf1 len=407 frame:-1 start:1462 end:242 gi|817052889|ref|XP_012258965.1| PREDICTED: probable pyruvate dehydrogenase E1 component subunit alpha, mitochondrial [Athalia rosae]	1	6	6	24.1	45.084	9.3483e-13	185310000	8056900
>Cluster-9846.12761; len=22 start:366 end:431; minus strand	1	1	1	63.6	2.6171	0.054698	0	0
>Cluster-9846.7682;orf1 len=523 frame:3 start:237 end:1805 gi|645042380|ref|XP_008210721.1| PREDICTED: nucleobindin-2 [Nasonia vitripennis]>gi|645042383|ref|XP_008210722.1| PREDICTED: nucleobindin-2 [Nasonia vitripennis]>gi|645042386|ref|XP_008210723.1| PREDICTED: nucleobindin-2 [Nasonia vitripennis];>Cluster-9846.7683;orf1 len=507 frame:3 start:237 end:1757 gi|645042380|ref|XP_008210721.1| PREDI…	3	3	3	7.6	62.47	4.6709e-14	135000000	6428600
>Cluster-9846.12795;orf1 len=862 frame:-1 start:3975 end:1390 gi|759075256|ref|XP_011347332.1| PREDICTED: glycogen phosphorylase [Cerapachys biroi]>gi|607354331|gb|EZA48982.1| Glycogen phosphorylase [Cerapachys biroi];>Cluster-10921.2;orf1 len=876 frame:2 start:2 end:2629 gi|852780732|ref|XP_012882564.1| PREDICTED: glycogen phosphorylase, brain form [Dipodomys ordii];>Cluster-10921.0;orf1 len=714…	4	11	11	16.3	99.144	1.2147e-92	409240000	7870000
>Cluster-9846.12809;orf1 len=387 frame:-3 start:1732 end:572 gi|156539529|ref|XP_001599066.1| PREDICTED: probable isocitrate dehydrogenase [NAD] subunit alpha, mitochondrial [Nasonia vitripennis]	1	12	12	38.9	42.642	2.084e-47	1264300000	66540000
>Cluster-9846.12845;orf1 len=213 frame:-1 start:2673 end:2035 gi|766932200|ref|XP_011498311.1| PREDICTED: myophilin [Ceratosolen solmsi marchali]	1	3	3	21.7	23.614	4.4101e-34	198360000	15258000
>Cluster-9846.12846;orf1 len=855 frame:2 start:254 end:2818 gi|766918370|ref|XP_011497950.1| PREDICTED: heat shock 70 kDa protein 4 isoform X2 [Ceratosolen solmsi marchali]	1	4	4	5.2	96.491	4.2367e-09	98284000	1890100
>Cluster-9846.12867;orf1 len=426 frame:3 start:3360 end:4637 gi|645027650|ref|XP_008204109.1| PREDICTED: glutamic acid-rich protein-like isoform X6 [Nasonia vitripennis]	1	2	2	5.6	48.19	8.9853e-07	126100000	12610000
>Cluster-9846.12907;orf1 len=1092 frame:2 start:158 end:3433 gi|345485396|ref|XP_003425261.1| PREDICTED: ATP-citrate synthase [Nasonia vitripennis]>gi|645033961|ref|XP_008201758.1| PREDICTED: ATP-citrate synthase [Nasonia vitripennis]	1	2	2	3.1	120.04	1.2919e-05	0	0
>Cluster-9846.12913; len=297 start:1076 end:1966; minus strand	1	13	13	52	33.501	3.0133e-58	1305000000	72502000
>Cluster-9846.1292;orf1 len=199 frame:-1 start:598 end:2 gi|345480945|ref|XP_003424252.1| PREDICTED: uncharacterized protein LOC100680511 [Nasonia vitripennis]	1	2	1	11.1	23.65	0.00015685	82722000	10340000
>Cluster-9846.1293;orf1 len=74 frame:1 start:1 end:222 gi|345480945|ref|XP_003424252.1| PREDICTED: uncharacterized protein LOC100680511 [Nasonia vitripennis]	1	1	1	16.2	8.67	0.00078571	652820000	217610000
>Cluster-9846.12931;orf1 len=720 frame:-3 start:3133 end:974 gi|645040960|ref|XP_001599966.3| PREDICTED: probable peroxisomal acyl-coenzyme A oxidase 1 [Nasonia vitripennis]>gi|645040963|ref|XP_008213186.1| PREDICTED: probable peroxisomal acyl-coenzyme A oxidase 1 [Nasonia vitripennis]>gi|645040965|ref|XP_008213187.1| PREDICTED: probable peroxisomal acyl-coenzyme A oxidase 1 [Nasonia vitripennis]	1	3	3	6.5	80.863	9.2227e-05	113750000	3074300
>Cluster-9846.12946;orf1 len=423 frame:1 start:295 end:1563 gi|238859549|ref|NP_001154979.1| major royal jelly protein-like 5 precursor [Nasonia vitripennis]	1	3	3	9	48.098	7.1079e-11	26577000	1063100
>Cluster-9846.1295;orf1 len=89 frame:1 start:1 end:267 gi|644993238|ref|XP_008203144.1| PREDICTED: uncharacterized protein LOC103315527 [Nasonia vitripennis]	1	1	1	10.1	10.502	9.4364e-05	336250000	112080000
>Cluster-9846.12971;orf1 len=481 frame:1 start:256 end:1698 gi|766937842|ref|XP_011501395.1| PREDICTED: cytosolic non-specific dipeptidase [Ceratosolen solmsi marchali];>Cluster-9846.12972;orf2 len=481 frame:1 start:256 end:1698 gi|766937842|ref|XP_011501395.1| PREDICTED: cytosolic non-specific dipeptidase [Ceratosolen solmsi marchali];>Cluster-9846.12973;orf1 len=481 frame:1 start:256 end:1698 g…	4	2	2	5.4	56.324	4.1332e-10	0	0
>Cluster-9846.12971;orf2 len=492 frame:-1 start:3738 end:2263 gi|766937842|ref|XP_011501395.1| PREDICTED: cytosolic non-specific dipeptidase [Ceratosolen solmsi marchali];>Cluster-9846.12972;orf1 len=492 frame:-2 start:3738 end:2263 gi|766937842|ref|XP_011501395.1| PREDICTED: cytosolic non-specific dipeptidase [Ceratosolen solmsi marchali];>Cluster-9846.12973;orf2 len=492 frame:-1 start:3738 end:…	4	7	7	21.8	55.173	5.5982e-31	350450000	12516000
>Cluster-9846.12989; len=173 start:384 end:901; minus strand	1	10	10	64	18.991	1.0935e-127	1978400000	179860000
>Cluster-9846.13063;orf1 len=121 frame:1 start:319 end:681 gi|645017853|ref|XP_008215767.1| PREDICTED: V-type proton ATPase subunit G [Nasonia vitripennis]	1	1	1	16.7	14.069	1.7467e-09	92808000	18562000
>Cluster-9846.13079; len=287 start:421 end:1280; minus strand;>Cluster-9846.5737; len=287 start:421 end:1280; minus strand	2	7	7	34.3	32.479	2.572e-82	682090000	42631000
>Cluster-9846.13089;orf1 len=373 frame:-1 start:2641 end:1523 gi|156554739|ref|XP_001605381.1| PREDICTED: carbonic anhydrase 2-like [Nasonia vitripennis]	1	2	2	8.1	41.431	5.3856e-08	67665000	3222200
>Cluster-9846.13190;orf1 len=223 frame:1 start:94 end:762 gi|156547512|ref|XP_001604111.1| PREDICTED: 40S ribosomal protein S8 [Nasonia vitripennis];>Cluster-19801.0;orf1 len=211 frame:1 start:1 end:633 gi|733901649|ref|XP_010714500.1| PREDICTED: 40S ribosomal protein S8 [Meleagris gallopavo]	2	2	1	8.1	25.445	0.00020245	0	0
>Cluster-9846.13191;orf1 len=136 frame:3 start:234 end:641 gi|645011591|ref|XP_008214316.1| PREDICTED: NHP2-like protein 1 homolog [Nasonia vitripennis]	1	1	1	8.9	14.928	0.0028336	28236000	3529500
>Cluster-9846.13213;orf1 len=115 frame:3 start:105 end:449 gi|156541150|ref|XP_001601398.1| PREDICTED: 60S acidic ribosomal protein P2 [Nasonia vitripennis]	1	1	1	24.6	11.81	5.4297e-09	61674000	8810500
>Cluster-9846.13239;orf1 len=566 frame:2 start:305 end:2002 gi|645016372|ref|XP_008211453.1| PREDICTED: adenylyl cyclase-associated protein 1 [Nasonia vitripennis]	1	1	1	1.8	62.337	0.0071804	36205000	1167900
>Cluster-9846.13261;orf1 len=337 frame:2 start:1208 end:2218 gi|645022667|ref|XP_008217468.1| PREDICTED: electron transfer flavoprotein subunit alpha, mitochondrial [Nasonia vitripennis]>gi|645022670|ref|XP_008217469.1| PREDICTED: electron transfer flavoprotein subunit alpha, mitochondrial [Nasonia vitripennis]	1	4	4	17	35.384	3.8437e-12	153030000	6653600
>Cluster-9846.13284;orf1 len=445 frame:-2 start:1584 end:250 gi|752889859|ref|XP_011262896.1| PREDICTED: rab GDP dissociation inhibitor beta [Camponotus floridanus]>gi|307172388|gb|EFN63854.1| Rab GDP dissociation inhibitor beta [Camponotus floridanus]	1	5	5	15.8	49.94	1.4533e-15	169530000	6520500
>Cluster-9846.13333;orf2 len=1228 frame:1 start:1 end:3684 gi|645012030|ref|XP_008204579.1| PREDICTED: transcription elongation factor SPT6 isoform X2 [Nasonia vitripennis]>gi|645012032|ref|XP_008204580.1| PREDICTED: transcription elongation factor SPT6 isoform X2 [Nasonia vitripennis]	1	1	1	0.7	140.15	0.010895	0	0
>Cluster-9846.13378;orf1 len=759 frame:1 start:1 end:2277 gi|340721945|ref|XP_003399373.1| PREDICTED: alpha-actinin, sarcomeric isoform X1 [Bombus terrestris]>gi|808134617|ref|XP_012169759.1| PREDICTED: alpha-actinin, sarcomeric isoform X1 [Bombus terrestris]>gi|808134619|ref|XP_012169760.1| PREDICTED: alpha-actinin, sarcomeric isoform X1 [Bombus terrestris];>Cluster-9846.321; len=194 start:1 end…	2	28	25	46	87.779	2.2288e-229	3008200000	55708000
>Cluster-9846.13419;orf1 len=416 frame:-2 start:2133 end:886 gi|645013540|ref|XP_008205155.1| PREDICTED: probable RISC-loading complex subunit BRAFLDRAFT_242885 isoform X1 [Nasonia vitripennis]>gi|645013542|ref|XP_008205156.1| PREDICTED: probable RISC-loading complex subunit BRAFLDRAFT_242885 isoform X1 [Nasonia vitripennis]>gi|645013544|ref|XP_008205157.1| PREDICTED: probable RISC-loading comple…	3	1	1	2.9	45.974	1.5565e-06	12739000	707730
>Cluster-9846.13439;orf1 len=155 frame:-1 start:717 end:253 gi|156549557|ref|XP_001606346.1| PREDICTED: general odorant-binding protein 56d [Nasonia vitripennis]>gi|355390003|emb|CCD17834.1| putative odorant binding protein 65 [Nasonia vitripennis]	1	2	2	17.5	16.851	6.0368e-11	168170000	18685000
>Cluster-9846.13442;orf2 len=439 frame:1 start:274 end:1590 gi|345493790|ref|XP_001605691.2| PREDICTED: probable Xaa-Pro aminopeptidase 3 isoform X1 [Nasonia vitripennis]>gi|645001932|ref|XP_008209748.1| PREDICTED: probable Xaa-Pro aminopeptidase 3 isoform X1 [Nasonia vitripennis]>gi|645001934|ref|XP_008209749.1| PREDICTED: probable Xaa-Pro aminopeptidase 3 isoform X1 [Nasonia vitripennis]	1	2	2	5.7	48.687	1.1338e-05	16496000	717210
>Cluster-9846.13487;orf1 len=277 frame:-1 start:2797 end:1967 gi|156546773|ref|XP_001607297.1| PREDICTED: ubiquitin-conjugating enzyme E2 variant 2 [Nasonia vitripennis]	1	1	1	3.6	31.356	0.0021674	30107000	2007100
>Cluster-9846.13534;orf1 len=300 frame:3 start:2373 end:3272 gi|345497874|ref|XP_001607430.2| PREDICTED: proteasome subunit alpha type-5 [Nasonia vitripennis]>gi|645032723|ref|XP_008214807.1| PREDICTED: proteasome subunit alpha type-5 [Nasonia vitripennis];>Cluster-9846.13535;orf1 len=300 frame:2 start:2405 end:3304 gi|345497874|ref|XP_001607430.2| PREDICTED: proteasome subunit alpha type-5 [Naso…	2	1	1	6.4	33.136	5.7256e-26	0	0
>Cluster-9846.13556;orf1 len=181 frame:3 start:750 end:1292 gi|645009832|ref|XP_008213338.1| PREDICTED: gamma-gliadin-like isoform X2 [Nasonia vitripennis]	1	2	2	15.6	20.095	3.0175e-13	1565000000	391240000
>Cluster-9846.21828;orf1 len=146 frame:2 start:2 end:439 gi|156536941|ref|XP_001608227.1| PREDICTED: histone H2A-like [Nasonia vitripennis]>gi|156538961|ref|XP_001599641.1| PREDICTED: histone H2A-like [Nasonia vitripennis]>gi|156538967|ref|XP_001599883.1| PREDICTED: histone H2A-like [Nasonia vitripennis]>gi|156539625|ref|XP_001599199.1| PREDICTED: histone H2A-like [Nasonia vitripennis]>gi|1565449…	2	3	1	26.9	15.794	1.414e-10	867140000	144520000
>Cluster-9846.13573;orf1 len=587 frame:3 start:21 end:1781 gi|229577287|ref|NP_001153340.1| alpha-glucosidase-like precursor [Nasonia vitripennis]	1	3	2	8.7	67.476	7.8414e-32	81492000	2810100
>Cluster-9846.13578;orf1 len=330 frame:3 start:6 end:995 gi|817191239|ref|XP_012271010.1| PREDICTED: probable enoyl-CoA hydratase, mitochondrial [Orussus abietinus]>gi|817191241|ref|XP_012271011.1| PREDICTED: probable enoyl-CoA hydratase, mitochondrial [Orussus abietinus]	1	6	6	27.1	35.389	1.1977e-26	361870000	22617000
>Cluster-9846.1359;orf1 len=472 frame:1 start:541 end:1956 gi|345485276|ref|XP_001599198.2| PREDICTED: carboxypeptidase B-like [Nasonia vitripennis];>Cluster-9846.2034;orf1 len=381 frame:1 start:541 end:1683 gi|345485276|ref|XP_001599198.2| PREDICTED: carboxypeptidase B-like [Nasonia vitripennis];>Cluster-9846.1357;orf1 len=335 frame:2 start:809 end:1813 gi|345485276|ref|XP_001599198.2| PREDICTED…	4	8	8	21.4	52.377	1.5496e-65	1889400000	104970000
>Cluster-9846.13651;orf1 len=841 frame:3 start:837 end:3359 gi|795096911|ref|XP_011880335.1| PREDICTED: twitchin isoform X30 [Vollenhovia emeryi]	1	12	12	18.2	95.021	3.6503e-85	845860000	20139000
>Cluster-9846.13658;orf1 len=207 frame:-2 start:1256 end:636 gi|156545575|ref|XP_001607669.1| PREDICTED: heat shock protein beta-6 isoform X2 [Nasonia vitripennis]>gi|226442061|gb|ACO57620.1| small heat shock protein [Pteromalus puparum]>gi|343488866|gb|AEM45800.1| small heat shock protein [Pteromalus puparum];>Cluster-9846.12863;orf1 len=247 frame:-2 start:1376 end:636 gi|645013101|ref|XP_008216…	3	6	6	51	23.537	3.4059e-29	2485400000	355060000
>Cluster-9846.13818;orf1 len=157 frame:-2 start:629 end:159 gi|645009913|ref|XP_008213360.1| PREDICTED: probable salivary secreted peptide [Nasonia vitripennis]	1	2	2	12.2	17.1	1.3874e-07	125670000	12567000
>Cluster-9846.13848;orf1 len=431 frame:2 start:386 end:1678 gi|156552444|ref|XP_001600953.1| PREDICTED: uncharacterized protein LOC100116463 [Nasonia vitripennis]	1	1	1	2.8	49.886	0.0010974	12789000	491890
>Cluster-9846.13889;orf1 len=708 frame:3 start:159 end:2282 gi|805802674|ref|XP_012145014.1| PREDICTED: succinate dehydrogenase [ubiquinone] flavoprotein subunit, mitochondrial [Megachile rotundata]	1	4	4	11.5	77.653	3.7147e-23	110860000	2917400
>Cluster-9846.13979;orf1 len=1632 frame:3 start:498 end:5393 gi|645012146|ref|XP_008204624.1| PREDICTED: uncharacterized protein LOC100680082 isoform X3 [Nasonia vitripennis]	1	1	1	0.7	183.8	0.015257	312340000	3395000
>Cluster-9846.13980;orf1 len=295 frame:-2 start:2080 end:1196 gi|238535370|gb|ACR44221.1| heat shock protein 40 [Pteromalus puparum]	1	4	4	18	31.431	2.7472e-18	102950000	7353700
>Cluster-9846.13997;orf1 len=288 frame:3 start:102 end:965 gi|645038118|ref|XP_008217499.1| PREDICTED: microtubule-associated protein RP/EB family member 1 isoform X1 [Nasonia vitripennis]>gi|645038121|ref|XP_008217500.1| PREDICTED: microtubule-associated protein RP/EB family member 1 isoform X1 [Nasonia vitripennis];>Cluster-9846.13995;orf2 len=282 frame:3 start:102 end:947 gi|645038130|ref|XP_0…	4	1	1	2.8	32.009	0.0068918	1090700000	72716000
>Cluster-9846.13996;orf1 len=471 frame:-2 start:1922 end:510 gi|156550309|ref|XP_001603446.1| PREDICTED: uncharacterized protein LOC100119722 [Nasonia vitripennis];>Cluster-9846.9024;orf1 len=471 frame:-3 start:1922 end:510 gi|156550309|ref|XP_001603446.1| PREDICTED: uncharacterized protein LOC100119722 [Nasonia vitripennis];>Cluster-9846.7225;orf1 len=532 frame:-3 start:1597 end:2 gi|156550309|r…	3	2	2	6	53.398	1.3641e-15	91611000	4164100
>Cluster-9846.14018;orf1 len=698 frame:2 start:326 end:2419 gi|805818153|ref|XP_012149255.1| PREDICTED: PDZ and LIM domain protein Zasp isoform X4 [Megachile rotundata];>Cluster-9846.11081;orf1 len=818 frame:2 start:326 end:2779 gi|817194364|ref|XP_012272679.1| PREDICTED: PDZ and LIM domain protein Zasp isoform X5 [Orussus abietinus];>Cluster-9846.14020;orf1 len=680 frame:2 start:326 end:2365 gi|…	6	17	10	31.9	74.978	1.1796e-59	2126900000	47265000
>Cluster-9846.14041;orf1 len=394 frame:3 start:330 end:1511 gi|645016853|ref|XP_008211658.1| PREDICTED: V-type proton ATPase subunit C isoform X2 [Nasonia vitripennis];>Cluster-17916.0;orf1 len=344 frame:-3 start:1033 end:2 gi|300676851|gb|ADK26726.1| ATPase, H+ transporting, lysosomal 42kDa, V1 subunit C2 [Zonotrichia albicollis];>Cluster-23950.0;orf1 len=292 frame:-3 start:984 end:109 gi|637252…	3	5	5	14.2	45.335	1.2468e-15	181090000	7243800
>Cluster-9846.14132;orf1 len=721 frame:3 start:1986 end:4148 gi|156553644|ref|XP_001600436.1| PREDICTED: heat shock protein 75 kDa, mitochondrial [Nasonia vitripennis];>Cluster-9846.21110;orf1 len=708 frame:3 start:3 end:2126 gi|795148254|ref|XP_011837957.1| PREDICTED: heat shock protein 75 kDa, mitochondrial isoform X1 [Mandrillus leucophaeus]	2	1	1	1.7	82.378	0.0092992	0	0
>Cluster-9846.9466;orf1 len=511 frame:1 start:373 end:1905 gi|766932007|ref|XP_011498210.1| PREDICTED: phosphatidylinositol-binding clathrin assembly protein LAP isoform X11 [Ceratosolen solmsi marchali];>Cluster-9846.9932;orf1 len=507 frame:1 start:373 end:1893 gi|766931991|ref|XP_011498201.1| PREDICTED: phosphatidylinositol-binding clathrin assembly protein LAP isoform X3 [Ceratosolen solmsi ma…	5	1	1	3.7	55.117	1.6304e-07	40698000	2142000
>Cluster-9846.14195;orf1 len=806 frame:2 start:371 end:2788 gi|345486620|ref|XP_001605497.2| PREDICTED: transitional endoplasmic reticulum ATPase TER94 [Nasonia vitripennis];>Cluster-6969.1; len=405 start:1 end:1213; minus strand;>Cluster-9846.10637;orf1 len=786 frame:-2 start:4262 end:1905 gi|229576829|ref|NP_001153385.1| vesicle-fusing ATPase [Nasonia vitripennis];>Cluster-9846.14081;orf1 len=7…	6	3	3	4.2	89.44	3.7654e-08	28591000	621550
>Cluster-9846.14264;orf1 len=501 frame:-2 start:3286 end:1784 gi|288856265|ref|NP_001165788.1| NADH dehydrogenase [ubiquinone] flavoprotein 1, mitochondrial [Nasonia vitripennis];>Cluster-6871.0; len=305 start:1 end:914; minus strand	2	3	3	8.2	55.398	2.0091e-10	116340000	5058300
>Cluster-9846.14297;orf1 len=279 frame:3 start:33 end:869 gi|645032350|ref|XP_008214712.1| PREDICTED: uncharacterized protein LOC100121014 [Nasonia vitripennis]>gi|355389969|emb|CCD17817.1| putative odorant binding protein 48 [Nasonia vitripennis];>Cluster-9846.12214;orf1 len=301 frame:3 start:3 end:905 gi|645032350|ref|XP_008214712.1| PREDICTED: uncharacterized protein LOC100121014 [Nasonia vitr…	2	8	8	38.5	31.604	9.1909e-153	668000000	41750000
>Cluster-9846.1435;orf1 len=316 frame:2 start:2 end:949 gi|345480945|ref|XP_003424252.1| PREDICTED: uncharacterized protein LOC100680511 [Nasonia vitripennis]	1	12	12	48.4	36.052	6.1816e-93	2894000000	170230000
>Cluster-9846.14351;orf1 len=170 frame:2 start:2 end:511 gi|156541512|ref|XP_001599916.1| PREDICTED: L-selectin [Nasonia vitripennis]	1	1	1	7.1	19.533	0.00056971	26500000	2944500
>Cluster-9846.14422;orf1 len=225 frame:1 start:1 end:675 gi|345491892|ref|XP_003426732.1| PREDICTED: uncharacterized protein LOC100115149 [Nasonia vitripennis]	1	4	4	24.1	24.591	1.8785e-151	212730000	21273000
>Cluster-9846.14431;orf1 len=359 frame:2 start:29 end:1105 gi|645011633|ref|XP_008214331.1| PREDICTED: UPF0764 protein C16orf89 homolog [Nasonia vitripennis]	1	7	7	22.6	41.302	1.2606e-60	1742400000	145200000
>Cluster-9846.9288; len=193 start:1 end:579; minus strand;>Cluster-9846.14463; len=111 start:1 end:333; minus strand	2	2	2	16.6	21.634	7.3974e-12	120490000	15061000
>Cluster-9846.14513;orf1 len=717 frame:1 start:673 end:2823 gi|345488106|ref|XP_001604322.2| PREDICTED: uncharacterized protein LOC100120714 isoform X2 [Nasonia vitripennis];>Cluster-9846.9072;orf1 len=717 frame:1 start:304 end:2454 gi|345488106|ref|XP_001604322.2| PREDICTED: uncharacterized protein LOC100120714 isoform X2 [Nasonia vitripennis];>Cluster-9846.8498;orf1 len=712 frame:2 start:737 en…	8	15	15	25.7	80.222	2.3932e-206	2935200000	68261000
>Cluster-9846.14583;orf1 len=125 frame:-2 start:718 end:344 gi|766922847|ref|XP_011506018.1| PREDICTED: 40S ribosomal protein S20 [Ceratosolen solmsi marchali]	1	1	1	9.7	14.202	0.012972	80217000	16043000
>Cluster-9846.14609;orf1 len=444 frame:1 start:199 end:1530 gi|645015625|ref|XP_008206539.1| PREDICTED: troponin T, skeletal muscle [Nasonia vitripennis];>Cluster-9846.15258;orf1 len=444 frame:3 start:66 end:1397 gi|645015625|ref|XP_008206539.1| PREDICTED: troponin T, skeletal muscle [Nasonia vitripennis];>Cluster-9846.14608;orf1 len=437 frame:3 start:66 end:1376 gi|746865721|ref|XP_011063897.1| …	5	12	12	22.8	52.321	3.0427e-53	15502000000	968890000
>Cluster-9846.14610;orf1 len=193 frame:-3 start:1434 end:856 gi|268607528|ref|NP_001161334.1| cuticular protein RR-1 family member 19 precursor [Nasonia vitripennis]	1	1	1	13	20.38	9.2369e-10	256920000	51383000
>Cluster-9846.14619;orf1 len=402 frame:-3 start:3032 end:1827 gi|156554575|ref|XP_001601415.1| PREDICTED: D-arabinitol dehydrogenase 1-like [Nasonia vitripennis]>gi|644995739|ref|XP_008209240.1| PREDICTED: D-arabinitol dehydrogenase 1-like [Nasonia vitripennis]	1	2	2	9.2	44.808	4.0887e-08	30123000	1506100
>Cluster-9846.14619;orf2 len=352 frame:2 start:125 end:1180 gi|156554575|ref|XP_001601415.1| PREDICTED: D-arabinitol dehydrogenase 1-like [Nasonia vitripennis]>gi|644995739|ref|XP_008209240.1| PREDICTED: D-arabinitol dehydrogenase 1-like [Nasonia vitripennis]	1	1	1	6	38.236	0.0011231	16178000	1011100
>Cluster-9846.14624;orf1 len=145 frame:-3 start:436 end:2 gi|644997264|ref|XP_008212280.1| PREDICTED: titin isoform X4 [Nasonia vitripennis]	1	2	2	19.3	16.475	4.5506e-05	0	0
>Cluster-9846.9842;orf1 len=171 frame:3 start:207 end:719 gi|766917354|ref|XP_011505332.1| PREDICTED: uncharacterized protein LOC105368088 isoform X4 [Ceratosolen solmsi marchali];>Cluster-9846.14664;orf1 len=123 frame:3 start:207 end:575 gi|645020021|ref|XP_008207023.1| PREDICTED: uncharacterized protein LOC100120906 isoform X1 [Nasonia vitripennis]>gi|645020024|ref|XP_008207024.1| PREDICTED: un…	3	1	1	8.8	20.212	1.0594e-06	38193000	3472100
>Cluster-9846.14680;orf1 len=205 frame:-2 start:2163 end:1549 gi|345483318|ref|XP_001602615.2| PREDICTED: peptidyl-prolyl cis-trans isomerase B-like [Nasonia vitripennis];>Cluster-9846.14673; len=121 start:195 end:556; minus strand	2	1	1	4.9	22.085	0.0033667	37942000	3794200
>Cluster-9846.14676;orf1 len=498 frame:1 start:232 end:1725 gi|156553206|ref|XP_001599732.1| PREDICTED: protein disulfide-isomerase A3 [Nasonia vitripennis]	1	10	10	25.4	56.382	1.4393e-55	770410000	28534000
>Cluster-9846.2262;orf1 len=111 frame:1 start:487 end:819 gi|345481096|ref|XP_003424286.1| PREDICTED: uncharacterized protein LOC100678044 [Nasonia vitripennis];>Cluster-9846.1478;orf1 len=100 frame:2 start:596 end:895 gi|345481096|ref|XP_003424286.1| PREDICTED: uncharacterized protein LOC100678044 [Nasonia vitripennis]	2	3	3	25.5	12.636	4.4362e-11	2088700000	348120000
>Cluster-9846.14848;orf1 len=433 frame:2 start:1439 end:2737 gi|156549032|ref|XP_001607937.1| PREDICTED: glycerol-3-phosphate dehydrogenase [NAD(+)], cytoplasmic isoform X2 [Nasonia vitripennis];>Cluster-9846.15050;orf1 len=430 frame:2 start:2 end:1291 gi|644992648|ref|XP_008202956.1| PREDICTED: glycerol-3-phosphate dehydrogenase [NAD(+)], cytoplasmic isoform X3 [Nasonia vitripennis];>Cluster-984…	5	6	4	16.7	47.561	1.8789e-15	176050000	7041900
>Cluster-9846.14894;orf1 len=425 frame:3 start:228 end:1502 gi|270013391|gb|EFA09839.1| hypothetical protein TcasGA2_TC011986 [Tribolium castaneum]	1	1	1	3.3	45.874	1.5222e-07	0	0
>Cluster-9846.1494; len=249 start:842 end:1589; minus strand	1	2	1	8.5	27.614	0.00012804	35925000	2566100
>Cluster-9846.14998;orf1 len=491 frame:-2 start:3531 end:2059 gi|766921320|ref|XP_011505175.1| PREDICTED: uncharacterized protein LOC105367992 [Ceratosolen solmsi marchali]	1	7	7	20.6	53.314	4.428e-38	584570000	22484000
>Cluster-9846.15051;orf1 len=316 frame:1 start:1 end:948 gi|156548238|ref|XP_001607198.1| PREDICTED: angiotensin-converting enzyme [Nasonia vitripennis]	1	1	1	3.5	35.78	0.0025729	8046200	502890
>Cluster-9846.7554;orf3 len=746 frame:2 start:2294 end:4531 gi|156549579|ref|XP_001602959.1| PREDICTED: calpain-B-like isoform X5 [Nasonia vitripennis];>Cluster-9846.7780;orf1 len=746 frame:3 start:2376 end:4613 gi|156549579|ref|XP_001602959.1| PREDICTED: calpain-B-like isoform X5 [Nasonia vitripennis];>Cluster-9846.8045;orf1 len=737 frame:2 start:1340 end:3550 gi|645007846|ref|XP_008203728.1| PR…	6	2	2	3.8	86.455	2.0127e-11	14086000	335390
>Cluster-9846.15131;orf1 len=1201 frame:3 start:339 end:3941 gi|156540073|ref|XP_001600219.1| PREDICTED: pyruvate carboxylase, mitochondrial isoform X1 [Nasonia vitripennis]>gi|345495988|ref|XP_003427614.1| PREDICTED: pyruvate carboxylase, mitochondrial isoform X1 [Nasonia vitripennis]>gi|645027556|ref|XP_008211776.1| PREDICTED: pyruvate carboxylase, mitochondrial isoform X1 [Nasonia vitripennis]…	4	3	3	3.3	133.04	1.786e-06	68369000	1035900
>Cluster-9846.15145;orf1 len=211 frame:3 start:891 end:1523 gi|345489260|ref|XP_003426083.1| PREDICTED: uncharacterized protein LOC100679460 [Nasonia vitripennis];>Cluster-9846.17111;orf1 len=110 frame:3 start:3915 end:4244 gi|345489260|ref|XP_003426083.1| PREDICTED: uncharacterized protein LOC100679460 [Nasonia vitripennis]	2	2	2	13.8	24.161	6.6349e-16	55113000	6889100
>Cluster-9846.1515;orf1 len=361 frame:2 start:2 end:1084 gi|645031647|ref|XP_008210187.1| PREDICTED: uncharacterized protein LOC103316723 [Nasonia vitripennis];>Cluster-9846.1514;orf2 len=221 frame:3 start:246 end:908 gi|645031647|ref|XP_008210187.1| PREDICTED: uncharacterized protein LOC103316723 [Nasonia vitripennis];>Cluster-9846.1514;orf1 len=67 frame:2 start:2 end:202 gi|645031647|ref|XP_008…	3	15	2	50.7	42.446	1.0885e-278	5072000000	253600000
>Cluster-9846.5508;orf1 len=349 frame:3 start:66 end:1112 gi|752876495|ref|XP_011255648.1| PREDICTED: annexin B9 [Camponotus floridanus]>gi|307181035|gb|EFN68809.1| Annexin-B9 [Camponotus floridanus];>Cluster-9846.5618;orf1 len=341 frame:3 start:285 end:1307 gi|752876495|ref|XP_011255648.1| PREDICTED: annexin B9 [Camponotus floridanus]>gi|307181035|gb|EFN68809.1| Annexin-B9 [Camponotus floridanus…	5	7	7	27.9	39.014	1.6383e-33	696360000	29015000
>Cluster-9846.15241;orf1 len=566 frame:-2 start:7087 end:5390 gi|766918610|ref|XP_011499275.1| PREDICTED: alanine aminotransferase 2 [Ceratosolen solmsi marchali]	1	6	6	16.6	62.138	2.1886e-36	302250000	9445300
>Cluster-9846.15248;orf1 len=1844 frame:-2 start:5534 end:3 gi|644997275|ref|XP_008212286.1| PREDICTED: muscle M-line assembly protein unc-89 isoform X5 [Nasonia vitripennis]	1	2	1	1.7	202.96	1.2535e-05	20052000	200520
>Cluster-9846.15249; len=1638 start:1489 end:6405; minus strand;>Cluster-9846.15652; len=409 start:1489 end:2717; minus strand	2	2	1	2.3	180.82	9.6103e-06	209350000	2275500
>Cluster-9846.15268;orf1 len=344 frame:2 start:47 end:1078 gi|156550600|ref|XP_001604166.1| PREDICTED: inorganic pyrophosphatase [Nasonia vitripennis]	1	2	2	7.6	38.94	0.00022242	38381000	2020100
>Cluster-9846.15283;orf1 len=157 frame:-1 start:1384 end:914 gi|766929883|ref|XP_011497053.1| PREDICTED: myosin-2 essential light chain isoform X2 [Ceratosolen solmsi marchali]	1	1	1	8.3	17.393	1.8052e-07	0	0
>Cluster-9846.15344;orf1 len=192 frame:1 start:1 end:576 gi|766917432|ref|XP_011505718.1| PREDICTED: uncharacterized protein LOC105368403 [Ceratosolen solmsi marchali]	1	2	2	14.1	21.33	6.7737e-05	43328000	3610600
>Cluster-9846.15346;orf1 len=639 frame:-1 start:2660 end:744 gi|766922006|ref|XP_011505547.1| PREDICTED: very long-chain specific acyl-CoA dehydrogenase, mitochondrial [Ceratosolen solmsi marchali]	1	2	2	5.5	69.608	1.8428e-08	40896000	1105300
>Cluster-9846.7853;orf1 len=951 frame:-1 start:3867 end:1015 gi|645020331|ref|XP_008207113.1| PREDICTED: hypoxia up-regulated protein 1 isoform X1 [Nasonia vitripennis]>gi|645020333|ref|XP_008207114.1| PREDICTED: hypoxia up-regulated protein 1 isoform X1 [Nasonia vitripennis]>gi|645020335|ref|XP_008207115.1| PREDICTED: hypoxia up-regulated protein 1 isoform X1 [Nasonia vitripennis]>gi|645020337|r…	3	6	6	8.1	106.8	2.1152e-26	124580000	2595400
>Cluster-9846.1543;orf1 len=926 frame:1 start:70 end:2847 gi|41054603|ref|NP_955880.1| alpha-actinin-4 [Danio rerio]>gi|32766291|gb|AAH54901.1| Actinin, alpha 4 [Danio rerio]>gi|269148256|gb|ACZ28499.1| Actn4 [Danio rerio];>Cluster-9846.266; len=117 start:1 end:351; minus strand	2	8	5	9.4	105.98	1.6519e-28	265510000	4741200
>Cluster-9846.15458;orf1 len=426 frame:-2 start:1393 end:116 gi|645018197|ref|XP_008205889.1| PREDICTED: uncharacterized protein LOC100680003 [Nasonia vitripennis]	1	3	3	7.8	47.898	1.0086e-05	58693000	2257400
>Cluster-9846.15459;orf1 len=2965 frame:-1 start:9390 end:496 gi|645016844|ref|XP_008211654.1| PREDICTED: LOW QUALITY PROTEIN: muscle M-line assembly protein unc-89 [Nasonia vitripennis]	1	48	8	22.2	335.79	2.3137e-190	2038300000	11782000
>Cluster-9846.15460; len=2509 start:496 end:8021; minus strand	1	42	2	22.5	285.41	1.5461e-176	0	0
>Cluster-9846.15466;orf1 len=511 frame:-2 start:6910 end:5378 gi|644998239|ref|XP_008215109.1| PREDICTED: adenosine deaminase CECR1-like isoform X1 [Nasonia vitripennis];>Cluster-9846.16922;orf1 len=511 frame:-2 start:7099 end:5567 gi|644998239|ref|XP_008215109.1| PREDICTED: adenosine deaminase CECR1-like isoform X1 [Nasonia vitripennis];>Cluster-9846.15466;orf2 len=509 frame:-1 start:4952 end:34…	4	20	20	56.1	58.65	3.993e-301	18126000000	823900000
>Cluster-9846.1548;orf1 len=120 frame:-3 start:464 end:105 gi|345496827|ref|XP_003427828.1| PREDICTED: uncharacterized protein LOC100678638 [Nasonia vitripennis]	1	4	4	23.5	13.079	4.5439e-26	30016000000	6003100000
>Cluster-9846.15515;orf1 len=331 frame:3 start:399 end:1391 gi|229606086|ref|NP_001153452.1| lipid storage droplet 2 [Nasonia vitripennis]	1	4	4	17.6	36.405	2.5622e-40	296240000	16458000
>Cluster-9846.15535;orf1 len=584 frame:-1 start:1915 end:164 gi|229577285|ref|NP_001153339.1| alpha-glucosidase-like [Nasonia vitripennis];>Cluster-9846.11608;orf1 len=616 frame:-3 start:2125 end:278 gi|156543062|ref|XP_001604688.1| PREDICTED: maltase 2 [Nasonia vitripennis]	2	15	14	33.6	66.422	1.8621e-91	1243700000	37687000
>Cluster-9846.18363;orf1 len=2123 frame:1 start:1 end:6369 gi|645023846|ref|XP_008210249.1| PREDICTED: basement membrane-specific heparan sulfate proteoglycan core protein isoform X1 [Nasonia vitripennis];>Cluster-9846.15555;orf1 len=2113 frame:1 start:1 end:6339 gi|645023855|ref|XP_008210251.1| PREDICTED: basement membrane-specific heparan sulfate proteoglycan core protein isoform X4 [Nasonia vi…	2	2	2	1.3	233.15	9.7803e-07	42455000	400520
>Cluster-9846.15593;orf1 len=121 frame:1 start:193 end:555 gi|240255403|ref|NP_001155298.1| NADH dehydrogenase [ubiquinone] iron-sulfur protein 5 [Nasonia vitripennis]	1	1	1	9.2	14.332	0.0080463	22008000	2751000
>Cluster-9846.15602;orf1 len=285 frame:2 start:818 end:1672 gi|645016577|ref|XP_008211533.1| PREDICTED: uncharacterized protein LOC100122769 [Nasonia vitripennis]>gi|645016579|ref|XP_008211534.1| PREDICTED: uncharacterized protein LOC100122769 [Nasonia vitripennis]	1	1	1	5.3	32.188	0.0072835	0	0
>Cluster-9846.15646;orf2 len=443 frame:-1 start:3806 end:2478 gi|288856313|ref|NP_001165809.1| cytochrome b-c1 complex subunit 2, mitochondrial [Nasonia vitripennis]	1	1	1	5	47.485	8.9087e-12	0	0
>Cluster-9846.15673;orf1 len=666 frame:1 start:1 end:1998 gi|345497248|ref|XP_003427944.1| PREDICTED: glucose dehydrogenase [FAD, quinone]-like [Nasonia vitripennis];>Cluster-9846.7886;orf1 len=666 frame:1 start:1 end:1998 gi|345497248|ref|XP_003427944.1| PREDICTED: glucose dehydrogenase [FAD, quinone]-like [Nasonia vitripennis]	2	1	1	2	74.736	0.00063246	45670000	1756500
>Cluster-9846.15683;orf1 len=593 frame:-1 start:2149 end:371 sp|B2D0J5|EST6_APIME Venom carboxylesterase-6 OS=Apis mellifera PE=2 SV=1;>Cluster-9846.17578;orf1 len=593 frame:-1 start:2940 end:1162 gi|289177104|ref|NP_001165965.1| carboxylesterase clade E, member 11 precursor [Nasonia vitripennis];>Cluster-9846.15570;orf1 len=569 frame:-3 start:2419 end:713 gi|289177106|ref|NP_001165966.1| carboxy…	4	3	3	5.4	66.716	1.8873e-09	83569000	2785600
>Cluster-9846.15698;orf1 len=659 frame:3 start:135 end:2111 gi|645019897|ref|XP_008206991.1| PREDICTED: leukocyte elastase inhibitor isoform X1 [Nasonia vitripennis];>Cluster-9846.9157;orf1 len=635 frame:3 start:135 end:2039 gi|645019900|ref|XP_001603946.3| PREDICTED: leukocyte elastase inhibitor isoform X2 [Nasonia vitripennis]	2	12	12	23.4	73.8	4.096e-49	1843500000	61449000
>Cluster-9846.15719;orf1 len=765 frame:-1 start:2530 end:236 gi|645012252|ref|XP_008204674.1| PREDICTED: heterogeneous nuclear ribonucleoprotein R-like [Nasonia vitripennis];>Cluster-9846.3691;orf1 len=760 frame:-1 start:2515 end:236 sp|O43390|HNRPR_HUMAN Heterogeneous nuclear ribonucleoprotein R OS=Homo sapiens GN=HNRNPR PE=1 SV=1;>Cluster-9846.15718;orf1 len=668 frame:-1 start:2290 end:287 gi|6…	6	4	4	7.1	84.441	1.301e-89	89177000	2175100
>Cluster-9846.15725;orf1 len=569 frame:-3 start:1948 end:242 gi|766934641|ref|XP_011499651.1| PREDICTED: non-specific lipid-transfer protein-like [Ceratosolen solmsi marchali]	1	3	3	8.5	62.247	8.0561e-23	51782000	2071300
>Cluster-9846.15816;orf1 len=439 frame:3 start:3 end:1319 gi|288856263|ref|NP_001165787.1| NADH dehydrogenase (ubiquinone) 1 alpha subcomplex, 9, 39kDa [Nasonia vitripennis]>gi|645014030|ref|XP_008203304.1| PREDICTED: NADH dehydrogenase (ubiquinone) 1 alpha subcomplex, 9, 39kDa isoform X1 [Nasonia vitripennis]	1	1	1	2.3	49.103	1.1025e-09	9542300	353420
>Cluster-9846.1583; len=167 start:97 end:597; minus strand;>Cluster-8960.1;orf1 len=173 frame:3 start:3 end:521 gi|148704795|gb|EDL36742.1| cofilin 2, muscle, isoform CRA_b, partial [Mus musculus]	2	3	3	29.5	18.502	5.291e-14	376800000	37680000
>Cluster-9846.17682;orf1 len=1967 frame:2 start:521 end:6421 sp|Q9V8R9|41_DROME Protein 4.1 homolog OS=Drosophila melanogaster GN=cora PE=1 SV=1;>Cluster-9846.7971;orf1 len=1940 frame:2 start:521 end:6340 gi|645017262|ref|XP_008205514.1| PREDICTED: protein 4.1 homolog isoform X5 [Nasonia vitripennis];>Cluster-9846.15880;orf1 len=1932 frame:3 start:453 end:6248 gi|345489382|ref|XP_003426125.1| PRE…	7	6	6	5	215.03	3.4941e-130	99743000	932170
>Cluster-9846.15979;orf1 len=416 frame:1 start:259 end:1506 gi|766930578|ref|XP_011497433.1| PREDICTED: probable aspartate aminotransferase, cytoplasmic [Ceratosolen solmsi marchali];>Cluster-9846.21734;orf1 len=417 frame:-1 start:1642 end:392 gi|795132985|ref|XP_011790961.1| PREDICTED: aspartate aminotransferase, cytoplasmic [Colobus angolensis palliatus];>Cluster-8891.0;orf1 len=288 frame:3 sta…	3	5	5	16.9	46.96	1.4405e-30	116810000	4672300
>Cluster-9846.15989;orf1 len=294 frame:2 start:29 end:910 gi|239050201|ref|NP_001155076.1| serine protease 50 precursor [Nasonia vitripennis]	1	2	2	8.5	31.588	6.9149e-05	74223000	7422300
>Cluster-9846.1600;orf1 len=241 frame:-1 start:1206 end:484 gi|345486709|ref|XP_001606457.2| PREDICTED: clarin-3 [Nasonia vitripennis]>gi|644992284|ref|XP_008202843.1| PREDICTED: clarin-3 [Nasonia vitripennis]>gi|644992286|ref|XP_008202844.1| PREDICTED: clarin-3 [Nasonia vitripennis]>gi|644992288|ref|XP_008202845.1| PREDICTED: clarin-3 [Nasonia vitripennis]>gi|644992290|ref|XP_008202846.1| PREDIC…	1	1	1	7.5	26.979	0.063791	19730000	1793700
>Cluster-9846.16008;orf1 len=381 frame:-3 start:2782 end:1640 gi|645031032|ref|XP_008210034.1| PREDICTED: leucine-rich repeat-containing protein 15-like [Nasonia vitripennis]	1	6	6	22.1	42.202	7.793e-24	479220000	29951000
>Cluster-9846.20149;orf1 len=733 frame:-1 start:2303 end:105 gi|345486350|ref|XP_003425456.1| PREDICTED: low-density lipoprotein receptor-related protein 2-like [Nasonia vitripennis];>Cluster-9846.1601; len=699 start:121 end:2215; minus strand;>Cluster-9846.1923;orf1 len=428 frame:-1 start:2326 end:1043 gi|345486350|ref|XP_003425456.1| PREDICTED: low-density lipoprotein receptor-related protein 2…	5	6	6	12.7	81.865	9.6595e-14	224770000	5482100
>Cluster-9846.16068;orf1 len=325 frame:-2 start:1264 end:290 gi|644995323|ref|XP_008214205.1| PREDICTED: 26S proteasome non-ATPase regulatory subunit 8-like [Nasonia vitripennis];>Cluster-9846.8708;orf1 len=325 frame:-1 start:1264 end:290 gi|644995323|ref|XP_008214205.1| PREDICTED: 26S proteasome non-ATPase regulatory subunit 8-like [Nasonia vitripennis]	2	1	1	3.7	37.044	7.8658e-15	0	0
>Cluster-9846.3597;orf1 len=718 frame:-1 start:2908 end:755 gi|766921753|ref|XP_011505408.1| PREDICTED: sphingomyelin phosphodiesterase-like [Ceratosolen solmsi marchali];>Cluster-9846.16098;orf1 len=709 frame:-1 start:2302 end:176 gi|766921753|ref|XP_011505408.1| PREDICTED: sphingomyelin phosphodiesterase-like [Ceratosolen solmsi marchali];>Cluster-9846.17290;orf1 len=699 frame:-1 start:3011 end…	3	1	1	1.8	82.564	0.0023252	26274000	821080
>Cluster-9846.16099;orf1 len=115 frame:-3 start:452 end:108 gi|288856289|ref|NP_001165798.1| NADH dehydrogenase [ubiquinone] 1 alpha subcomplex subunit 7 [Nasonia vitripennis]	1	1	1	8.8	12.942	0.0092477	19157000	2128500
>Cluster-9846.17078;orf1 len=226 frame:-2 start:1066 end:389 gi|156546789|ref|XP_001605784.1| PREDICTED: dual specificity protein phosphatase 3-like isoform X1 [Nasonia vitripennis];>Cluster-9846.16234; len=211 start:389 end:1021; minus strand	2	4	4	21.8	25.905	2.1712e-19	223930000	17226000
>Cluster-9846.16283;orf1 len=254 frame:2 start:2 end:763 gi|156554116|ref|XP_001602967.1| PREDICTED: probable protein disulfide-isomerase A6 [Nasonia vitripennis]	1	5	5	24.1	27.854	1.2776e-12	188250000	14480000
>Cluster-9846.16392;orf1 len=171 frame:3 start:393 end:905 gi|345494815|ref|XP_003427378.1| PREDICTED: probable phospholipid hydroperoxide glutathione peroxidase isoform X1 [Nasonia vitripennis]>gi|645011740|ref|XP_008210669.1| PREDICTED: probable phospholipid hydroperoxide glutathione peroxidase isoform X1 [Nasonia vitripennis]>gi|645011743|ref|XP_008210670.1| PREDICTED: probable phospholipid hy…	1	6	6	44.1	19.257	2.667e-21	232600000	21145000
>Cluster-9846.16446;orf2 len=739 frame:-2 start:6026 end:3810 gi|645009529|ref|XP_008210464.1| PREDICTED: uncharacterized protein LOC100680448 isoform X1 [Nasonia vitripennis]>gi|645009532|ref|XP_008210465.1| PREDICTED: uncharacterized protein LOC100680448 isoform X1 [Nasonia vitripennis]>gi|645009535|ref|XP_008210466.1| PREDICTED: uncharacterized protein LOC100680448 isoform X1 [Nasonia vitripen…	3	3	3	5.3	81.186	8.1555e-08	22596000	728890
>Cluster-9846.1657;orf1 len=364 frame:-3 start:1292 end:201 gi|795264447|ref|XP_011811659.1| PREDICTED: glyceraldehyde-3-phosphate dehydrogenase-like isoform X1 [Colobus angolensis palliatus];>Cluster-2179.0; len=212 start:1 end:634; minus strand;>Cluster-9846.21999; len=81 start:1 end:241; minus strand;>Cluster-16669.1; len=72 start:1 end:212; minus strand	4	6	5	23.4	38.99	1.6358e-32	500240000	26329000
>Cluster-9846.16621;orf1 len=586 frame:1 start:220 end:1977 gi|766922024|ref|XP_011505558.1| PREDICTED: moesin/ezrin/radixin homolog 1 isoform X3 [Ceratosolen solmsi marchali];>Cluster-9846.16620;orf1 len=576 frame:1 start:355 end:2082 gi|766922024|ref|XP_011505558.1| PREDICTED: moesin/ezrin/radixin homolog 1 isoform X3 [Ceratosolen solmsi marchali];>Cluster-9846.1471;orf1 len=623 frame:3 start:3…	4	8	8	14.5	69.381	1.5327e-32	272710000	8797200
>Cluster-9846.16636;orf1 len=233 frame:3 start:132 end:830 gi|156554577|ref|XP_001601920.1| PREDICTED: proteasome subunit beta type-6 [Nasonia vitripennis]	1	2	2	7.3	24.88	0.00025384	28227000	2352200
>Cluster-9846.16857;orf1 len=296 frame:3 start:102 end:989 gi|156538681|ref|XP_001607764.1| PREDICTED: adenylate kinase [Nasonia vitripennis];>Cluster-9846.16705;orf1 len=271 frame:1 start:28 end:840 gi|156538681|ref|XP_001607764.1| PREDICTED: adenylate kinase [Nasonia vitripennis];>Cluster-9846.16706;orf1 len=258 frame:3 start:270 end:1043 gi|156538681|ref|XP_001607764.1| PREDICTED: adenylate ki…	4	3	3	10.5	33.025	4.425e-05	67986000	3090300
>Cluster-9846.16711;orf1 len=346 frame:1 start:238 end:1275 gi|156543358|ref|XP_001607969.1| PREDICTED: fructose-1,6-bisphosphatase 1 [Nasonia vitripennis]>gi|645016521|ref|XP_008211512.1| PREDICTED: fructose-1,6-bisphosphatase 1 [Nasonia vitripennis]>gi|645016523|ref|XP_008211513.1| PREDICTED: fructose-1,6-bisphosphatase 1 [Nasonia vitripennis]	1	1	1	3.5	37.579	0.0012872	26391000	1885000
>Cluster-9846.1688;orf1 len=665 frame:3 start:1965 end:3959 gi|345481204|ref|XP_003424313.1| PREDICTED: LOW QUALITY PROTEIN: xaa-Pro aminopeptidase 1 [Nasonia vitripennis]	1	26	0	45.8	76.943	7.556e-178	2438100000	81271000
>Cluster-9846.7809;orf1 len=569 frame:2 start:248 end:1954 gi|645034851|ref|XP_008201993.1| PREDICTED: uncharacterized protein LOC100122591 [Nasonia vitripennis];>Cluster-9846.16899;orf1 len=521 frame:3 start:36 end:1598 gi|645034851|ref|XP_008201993.1| PREDICTED: uncharacterized protein LOC100122591 [Nasonia vitripennis];>Cluster-9846.16898;orf1 len=518 frame:1 start:1 end:1554 gi|645034851|ref|…	3	2	2	4	64.021	3.7159e-06	14750000	670440
>Cluster-9846.16923; len=1283 start:641 end:4488; minus strand;>Cluster-9846.18261; len=1271 start:641 end:4452; minus strand;>Cluster-9846.14027; len=1256 start:641 end:4407; minus strand;>Cluster-9846.7684; len=1011 start:1 end:3032; minus strand;>Cluster-9846.14026; len=943 start:1 end:2828; minus strand;>Cluster-9846.19407;orf1 len=748 frame:1 start:79 end:2322 gi|861638737|gb|KMQ92609.1| twi…	6	6	1	6.3	144.33	9.4431e-16	552780000	9369200
>Cluster-9846.1696;orf1 len=292 frame:-1 start:1112 end:237 gi|238859625|ref|NP_001155017.1| serine protease 33 precursor [Nasonia vitripennis]	1	12	12	61.9	31.88	7.0244e-212	20777000000	1484100000
>Cluster-9846.16992;orf1 len=513 frame:1 start:280 end:1818 gi|766926682|ref|XP_011495298.1| PREDICTED: putative serine protease K12H4.7 [Ceratosolen solmsi marchali]	1	3	3	7.6	57.795	2.7905e-11	26927000	1121900
>Cluster-9846.20812;orf1 len=442 frame:2 start:2 end:1327 gi|148691289|gb|EDL23236.1| tubulin, beta 5, partial [Mus musculus];>Cluster-9846.20707;orf1 len=441 frame:2 start:2 end:1324 gi|562833975|ref|XP_006172159.1| PREDICTED: LOW QUALITY PROTEIN: tubulin, beta class I [Tupaia chinensis];>Cluster-9846.17011;orf1 len=440 frame:2 start:2 end:1321 gi|148691289|gb|EDL23236.1| tubulin, beta 5, partia…	18	8	8	22.9	49.367	1.5091e-63	328530000	16426000
>Cluster-9846.1750;orf1 len=136 frame:-2 start:1003 end:596 gi|156548418|ref|XP_001604583.1| PREDICTED: probable salivary secreted peptide [Nasonia vitripennis]	1	1	1	22.2	14.732	7.6676e-23	34685000	8671300
>Cluster-9846.17577;orf1 len=806 frame:-1 start:3740 end:1323 gi|345480007|ref|XP_001603578.2| PREDICTED: prolyl endopeptidase [Nasonia vitripennis]>gi|645003293|ref|XP_008212488.1| PREDICTED: prolyl endopeptidase [Nasonia vitripennis];>Cluster-9846.8390;orf1 len=806 frame:-3 start:3740 end:1323 gi|345480007|ref|XP_001603578.2| PREDICTED: prolyl endopeptidase [Nasonia vitripennis]>gi|645003293|re…	2	2	2	4.5	90.586	1.1189e-07	0	0
>Cluster-9846.17579;orf2 len=235 frame:-1 start:1556 end:852 gi|645017868|ref|XP_008216247.1| PREDICTED: isochorismatase domain-containing protein 2, mitochondrial-like [Nasonia vitripennis]>gi|645017870|ref|XP_008216294.1| PREDICTED: isochorismatase domain-containing protein 2, mitochondrial-like [Nasonia vitripennis]	1	2	2	12.4	25.947	0.00020759	26138000	2178200
>Cluster-9846.21556;orf1 len=103 frame:-2 start:309 end:1 gi|644993845|ref|XP_008213317.1| PREDICTED: serine protease 87 isoform X1 [Nasonia vitripennis];>Cluster-9846.1763;orf1 len=90 frame:-2 start:270 end:1 gi|644993845|ref|XP_008213317.1| PREDICTED: serine protease 87 isoform X1 [Nasonia vitripennis];>Cluster-9846.20021;orf1 len=68 frame:-3 start:204 end:1 gi|644993845|ref|XP_008213317.1| PRE…	3	1	1	12.6	11.814	1.7509e-12	774860000	110690000
>Cluster-9846.3085;orf1 len=1411 frame:3 start:57 end:4289 gi|766940371|ref|XP_011502780.1| PREDICTED: nidogen-2 [Ceratosolen solmsi marchali];>Cluster-9846.6893;orf1 len=1365 frame:3 start:57 end:4151 gi|752898069|ref|XP_011267372.1| PREDICTED: nidogen-2 isoform X3 [Camponotus floridanus];>Cluster-9846.4895;orf1 len=1323 frame:3 start:57 end:4025 gi|572307775|ref|XP_006619735.1| PREDICTED: nidog…	7	10	10	11.1	155.14	5.5689e-52	465530000	6846000
>Cluster-9846.17691; len=275 start:12 end:835; minus strand	1	2	2	10.2	30.523	1.023e-08	106440000	8187700
>Cluster-9846.17700;orf1 len=1851 frame:3 start:141 end:5693 gi|345480945|ref|XP_003424252.1| PREDICTED: uncharacterized protein LOC100680511 [Nasonia vitripennis];>Cluster-9846.2525;orf2 len=1851 frame:3 start:141 end:5693 gi|345480945|ref|XP_003424252.1| PREDICTED: uncharacterized protein LOC100680511 [Nasonia vitripennis]	2	72	72	43.6	213.93	0	18412000000	184120000
>Cluster-9846.1782;orf1 len=277 frame:-2 start:832 end:2 gi|289331063|ref|NP_001166092.1| serine protease 87 precursor [Nasonia vitripennis];>Cluster-9846.1783;orf1 len=116 frame:-1 start:1135 end:788 gi|289331063|ref|NP_001166092.1| serine protease 87 precursor [Nasonia vitripennis];>Cluster-9846.1789;orf1 len=59 frame:2 start:3677 end:3853 gi|289331063|ref|NP_001166092.1| serine protease 87 pre…	3	9	0	48.4	30.529	9.8312e-92	1784800000	127490000
>Cluster-9846.1782;orf2 len=294 frame:1 start:3139 end:4020 gi|289331063|ref|NP_001166092.1| serine protease 87 precursor [Nasonia vitripennis];>Cluster-9846.1783;orf2 len=294 frame:1 start:3442 end:4323 gi|289331063|ref|NP_001166092.1| serine protease 87 precursor [Nasonia vitripennis];>Cluster-9846.1781;orf1 len=101 frame:-1 start:303 end:1 gi|289331063|ref|NP_001166092.1| serine protease 87 pr…	3	9	1	45.7	32.583	6.0149e-51	1633900000	108920000
>Cluster-9846.1788;orf1 len=300 frame:-3 start:1059 end:160 gi|644994141|ref|XP_008214290.1| PREDICTED: transmembrane protease serine 9-like [Nasonia vitripennis];>Cluster-9846.1789;orf2 len=300 frame:-3 start:1059 end:160 gi|289331063|ref|NP_001166092.1| serine protease 87 precursor [Nasonia vitripennis];>Cluster-9846.21557;orf2 len=300 frame:-2 start:1059 end:160 gi|289331063|ref|NP_001166092.1…	3	9	0	31.4	33.012	7.4178e-166	7466000000	622170000
>Cluster-9846.1793;orf1 len=187 frame:2 start:2 end:562 gi|119581485|gb|EAW61081.1| peptidylprolyl isomerase A-like, isoform CRA_c [Homo sapiens];>Cluster-23122.2; len=68 start:1 end:204; minus strand;>Cluster-17696.0; len=96 start:182 end:469; minus strand;>Cluster-17696.1;orf1 len=92 frame:-1 start:276 end:1 gi|261490820|ref|NP_001159798.1| peptidyl-prolyl cis-trans isomerase A [Gallus gallus]>…	4	5	5	37.6	20.228	1.8541e-16	459820000	41802000
>Cluster-9846.1795; len=357 start:165 end:1235; minus strand	1	1	1	3.7	37.49	0.011747	13683000	804850
>Cluster-9846.17962;orf1 len=401 frame:2 start:101 end:1303 gi|156548948|ref|XP_001607032.1| PREDICTED: acetyl-CoA acetyltransferase, cytosolic [Nasonia vitripennis];>Cluster-9846.4395;orf2 len=401 frame:2 start:101 end:1303 gi|644992481|ref|XP_008202905.1| PREDICTED: 5'-nucleotidase domain-containing protein 1-like isoform X1 [Nasonia vitripennis];>Cluster-9846.5696;orf2 len=401 frame:2 start:10…	3	1	1	2.8	41.807	0.0097082	16421000	864260
>Cluster-9846.18004;orf1 len=509 frame:1 start:1 end:1527 gi|645034347|ref|XP_008201863.1| PREDICTED: selenium-binding protein 1-A isoform X1 [Nasonia vitripennis]>gi|645034350|ref|XP_008201864.1| PREDICTED: selenium-binding protein 1-A isoform X1 [Nasonia vitripennis];>Cluster-9846.5510;orf1 len=505 frame:1 start:1 end:1515 gi|345485514|ref|XP_001606344.2| PREDICTED: selenium-binding protein 1-A…	2	1	1	3.1	57.291	0.012537	0	0
>Cluster-9846.21442; len=193 start:1 end:579; minus strand;>Cluster-9846.19952; len=126 start:52 end:427; minus strand;>Cluster-9846.19953; len=126 start:45 end:420; minus strand;>Cluster-9846.20536; len=126 start:100 end:475; minus strand;>Cluster-9846.18012; len=89 start:1 end:265; minus strand;>Cluster-9846.2510; len=76 start:1 end:228; minus strand;>Cluster-9846.19954; len=75 start:141 end:36…	37	3	3	17.6	21.099	2.7555e-10	152380000	15238000
>Cluster-9846.18036;orf1 len=426 frame:3 start:126 end:1403 gi|156548625|ref|XP_001608210.1| PREDICTED: hydroxysteroid dehydrogenase-like protein 2 [Nasonia vitripennis]	1	2	2	5.6	46.235	0.00020687	38063000	1522500
>Cluster-9846.1804;orf1 len=771 frame:-1 start:2837 end:525 gi|645023238|ref|XP_008202483.1| PREDICTED: endothelin-converting enzyme 1-like [Nasonia vitripennis];>Cluster-9846.18104;orf1 len=693 frame:-1 start:2079 end:1 gi|345492449|ref|XP_001600059.2| PREDICTED: neprilysin-2-like isoform X4 [Nasonia vitripennis];>Cluster-9846.4716;orf1 len=682 frame:-1 start:2046 end:1 gi|345492449|ref|XP_00160…	5	14	14	22.5	88.885	3.4429e-97	996810000	21670000
>Cluster-9846.18041;orf1 len=446 frame:1 start:217 end:1554 gi|766942152|ref|XP_011503730.1| PREDICTED: probable medium-chain specific acyl-CoA dehydrogenase, mitochondrial [Ceratosolen solmsi marchali]	1	4	4	12.4	48.914	2.2937e-12	108130000	3861700
>Cluster-9846.1812; len=94 start:178 end:459; minus strand	1	1	1	8.5	10.377	0.0020568	30827000	5137800
>Cluster-9846.18150;orf1 len=450 frame:2 start:782 end:2131 gi|345484059|ref|XP_003424938.1| PREDICTED: pancreatic triacylglycerol lipase-like [Nasonia vitripennis];>Cluster-9846.11684;orf1 len=314 frame:2 start:782 end:1723 gi|345484059|ref|XP_003424938.1| PREDICTED: pancreatic triacylglycerol lipase-like [Nasonia vitripennis];>Cluster-9846.11684;orf2 len=151 frame:3 start:1767 end:2219 gi|34548…	6	13	13	41.2	50.446	5.1066e-197	6074800000	289280000
>Cluster-9846.18208;orf1 len=402 frame:2 start:134 end:1339 gi|645023640|ref|XP_001599554.3| PREDICTED: serine protease persephone isoform X1 [Nasonia vitripennis];>Cluster-9846.18209;orf1 len=398 frame:2 start:134 end:1327 gi|645023643|ref|XP_008206147.1| PREDICTED: serine protease snake isoform X2 [Nasonia vitripennis];>Cluster-9846.18205;orf1 len=388 frame:1 start:2083 end:3246 gi|645023640|re…	5	13	13	47.4	44.038	1.2084e-172	5021900000	295410000
>Cluster-9846.1821;orf1 len=69 frame:1 start:1 end:207 gi|645007082|ref|XP_001605658.3| PREDICTED: chymotrypsin-2 [Nasonia vitripennis]	1	2	1	25	7.5357	1.9486e-05	158460000	31691000
>Cluster-9846.1827; len=97 start:144 end:434; minus strand	1	1	1	20.8	10.3	2.8579e-10	4558300000	2279200000
>Cluster-9846.3992;orf1 len=666 frame:3 start:369 end:2366 gi|645002840|ref|XP_008208025.1| PREDICTED: carnitine O-acetyltransferase-like isoform X3 [Nasonia vitripennis]>gi|645002842|ref|XP_008208026.1| PREDICTED: carnitine O-acetyltransferase-like isoform X4 [Nasonia vitripennis];>Cluster-9846.3991;orf1 len=649 frame:3 start:3 end:1949 gi|645002838|ref|XP_008208024.1| PREDICTED: carnitine O-ace…	5	2	2	3.9	75.473	0.00033649	0	0
>Cluster-9846.1836;orf1 len=665 frame:2 start:1814 end:3808 gi|345481204|ref|XP_003424313.1| PREDICTED: LOW QUALITY PROTEIN: xaa-Pro aminopeptidase 1 [Nasonia vitripennis];>Cluster-9846.20359;orf1 len=665 frame:1 start:1363 end:3357 gi|345481204|ref|XP_003424313.1| PREDICTED: LOW QUALITY PROTEIN: xaa-Pro aminopeptidase 1 [Nasonia vitripennis];>Cluster-9846.20360;orf1 len=665 frame:2 start:1397 en…	4	25	1	43.5	76.653	1.6934e-200	303660000	9795600
>Cluster-9846.1841;orf1 len=134 frame:2 start:2 end:403 gi|645025152|ref|XP_008212918.1| PREDICTED: uncharacterized protein LOC100119874 [Nasonia vitripennis]	1	2	2	18.8	15.694	1.3848e-27	379300000	63216000
>Cluster-9846.18468;orf1 len=296 frame:-1 start:2729 end:1842 gi|156542825|ref|XP_001608075.1| PREDICTED: thioredoxin-like protein 1 isoform X1 [Nasonia vitripennis]>gi|645002144|ref|XP_008209849.1| PREDICTED: thioredoxin-like protein 1 isoform X1 [Nasonia vitripennis]>gi|645002146|ref|XP_008209850.1| PREDICTED: thioredoxin-like protein 1 isoform X1 [Nasonia vitripennis]>gi|645002148|ref|XP_00820…	2	1	1	3.7	32.239	0.0018621	37753000	2904000
>Cluster-9846.18495;orf1 len=262 frame:2 start:92 end:877 gi|156552868|ref|XP_001600528.1| PREDICTED: dehydrogenase/reductase SDR family member 11-like isoform X2 [Nasonia vitripennis]	1	2	2	7.7	28.399	0.0011847	23078000	1538600
>Cluster-9846.18602;orf2 len=231 frame:3 start:3 end:695 gi|746868547|ref|XP_011065403.1| PREDICTED: uncharacterized protein LOC105152688 isoform X2 [Acromyrmex echinatior];>Cluster-9846.18603;orf1 len=218 frame:3 start:3 end:656 gi|645019526|ref|XP_008206879.1| PREDICTED: zinc finger and SCAN domain-containing protein 31-like [Nasonia vitripennis]	2	8	8	46.5	25.373	3.2225e-57	836180000	55745000
>Cluster-9846.18696;orf1 len=1000 frame:-1 start:3983 end:984 gi|644999910|ref|XP_008215764.1| PREDICTED: vinculin [Nasonia vitripennis];>Cluster-9846.7334;orf1 len=974 frame:-1 start:3905 end:984 gi|644999910|ref|XP_008215764.1| PREDICTED: vinculin [Nasonia vitripennis]	2	7	7	10.3	109.98	8.3776e-61	164250000	2783900
>Cluster-9846.18838;orf1 len=224 frame:2 start:62 end:733 gi|156554381|ref|XP_001600064.1| PREDICTED: uncharacterized protein LOC100119207 [Nasonia vitripennis];>Cluster-9846.18839;orf1 len=229 frame:2 start:62 end:748 gi|156554381|ref|XP_001600064.1| PREDICTED: uncharacterized protein LOC100119207 [Nasonia vitripennis]	2	5	5	27.4	25.025	3.2763e-43	804710000	80471000
>Cluster-9846.18860;orf1 len=633 frame:3 start:3 end:1901 gi|769839120|ref|XP_011630722.1| PREDICTED: glutamate decarboxylase isoform X1 [Pogonomyrmex barbatus];>Cluster-9846.4554;orf1 len=552 frame:1 start:340 end:1995 gi|769839120|ref|XP_011630722.1| PREDICTED: glutamate decarboxylase isoform X1 [Pogonomyrmex barbatus]	2	2	2	3.2	70.979	0.0018916	35430000	1362700
>Cluster-9846.1888;orf1 len=322 frame:-2 start:1031 end:66 gi|556732746|ref|XP_005962035.1| PREDICTED: 60S acidic ribosomal protein P0 isoform X1 [Pantholops hodgsonii]	1	1	1	6.9	34.701	0.00039248	19523000	1501700
>Cluster-9846.1893;orf1 len=772 frame:-1 start:2654 end:339 gi|20127408|ref|NP_000173.2| trifunctional enzyme subunit alpha, mitochondrial precursor [Homo sapiens]>gi|20141376|sp|P40939.2|ECHA_HUMAN RecName: Full=Trifunctional enzyme subunit alpha, mitochondrial; AltName: Full=78 kDa gastrin-binding protein; AltName: Full=TP-alpha; Includes: RecName: Full=Long-chain enoyl-CoA hydratase; Includes:…	1	1	1	1.8	83.922	3.6628e-06	0	0
>Cluster-9846.19122;orf1 len=270 frame:-2 start:1303 end:494 gi|645028785|ref|XP_008212275.1| PREDICTED: proteasome subunit alpha type-4 isoform X1 [Nasonia vitripennis]	1	1	1	4.5	30.357	0.0064421	98813000	7058100
>Cluster-9846.21765;orf1 len=185 frame:-2 start:683 end:129 gi|156545581|ref|XP_001607807.1| PREDICTED: troponin C-like [Nasonia vitripennis];>Cluster-9846.21766;orf1 len=155 frame:-1 start:593 end:129 gi|156545581|ref|XP_001607807.1| PREDICTED: troponin C-like [Nasonia vitripennis];>Cluster-9846.193;orf1 len=149 frame:-1 start:575 end:129 gi|156545581|ref|XP_001607807.1| PREDICTED: troponin C-li…	3	3	3	25	21.098	1.5789e-39	174830000	19426000
>Cluster-9846.1935;orf1 len=684 frame:3 start:756 end:2807 gi|645019128|ref|XP_008206401.1| PREDICTED: uncharacterized protein LOC103316135 [Nasonia vitripennis]	1	33	30	54.9	79.729	9.1711e-275	18668000000	405830000
>Cluster-9846.19397;orf1 len=1790 frame:-3 start:6341 end:972 gi|156549170|ref|XP_001607740.1| PREDICTED: laminin subunit beta-1 [Nasonia vitripennis]>gi|644993051|ref|XP_008203086.1| PREDICTED: laminin subunit beta-1 [Nasonia vitripennis]>gi|644993053|ref|XP_008203087.1| PREDICTED: laminin subunit beta-1 [Nasonia vitripennis];>Cluster-9846.19398;orf1 len=1790 frame:-3 start:6341 end:972 gi|15654…	2	20	20	15.8	199.28	2.9157e-105	1033200000	11741000
>Cluster-9846.1941;orf1 len=571 frame:-1 start:1884 end:172 gi|645021613|ref|XP_001601317.2| PREDICTED: uncharacterized protein LOC100116956 [Nasonia vitripennis];>Cluster-9846.7527;orf1 len=608 frame:-3 start:1991 end:168 gi|156546659|ref|XP_001603584.1| PREDICTED: esterase E4 [Nasonia vitripennis];>Cluster-9846.20482; len=167 start:179 end:678; minus strand	3	19	16	41.9	64.35	7.3896e-142	5569400000	198910000
>Cluster-9846.19560;orf1 len=411 frame:3 start:2262 end:3494 gi|239048216|ref|NP_001155043.1| serine protease 22 precursor [Nasonia vitripennis];>Cluster-9846.19559;orf1 len=373 frame:3 start:318 end:1436 gi|239048216|ref|NP_001155043.1| serine protease 22 precursor [Nasonia vitripennis]	2	20	20	53.2	45.731	8.42e-215	8370000000	334800000
>Cluster-9846.19647; len=1258 start:1638 end:5411; minus strand	1	11	11	12.1	139.21	5.6327e-86	565190000	8191200
>Cluster-9846.1980;orf1 len=391 frame:1 start:2098 end:3270 gi|345481008|ref|XP_003424265.1| PREDICTED: uncharacterized protein LOC100679065 [Nasonia vitripennis];>Cluster-9846.20175;orf2 len=103 frame:1 start:2098 end:2406 gi|345481008|ref|XP_003424265.1| PREDICTED: uncharacterized protein LOC100679065 [Nasonia vitripennis]	2	15	15	39.7	44.688	1.8527e-175	19444000000	972220000
>Cluster-9846.20420;orf1 len=306 frame:2 start:548 end:1465 gi|645006427|ref|XP_008204782.1| PREDICTED: uncharacterized protein LOC100116530 [Nasonia vitripennis];>Cluster-9846.20421;orf1 len=265 frame:1 start:238 end:1032 gi|645006427|ref|XP_008204782.1| PREDICTED: uncharacterized protein LOC100116530 [Nasonia vitripennis];>Cluster-9846.20419;orf1 len=213 frame:3 start:471 end:1109 gi|645006427|…	12	3	3	11.8	35.051	4.9888e-09	67611000	3380500
>Cluster-9846.19868; len=102 start:117 end:422; minus strand;>Cluster-9846.19869; len=102 start:117 end:422; minus strand	2	4	4	36.6	11.33	1.9968e-19	967150000	161190000
>Cluster-9846.19896;orf1 len=700 frame:-2 start:3705 end:1606 gi|345493261|ref|XP_001604126.2| PREDICTED: uncharacterized protein LOC100120484 [Nasonia vitripennis];>Cluster-9846.20099;orf1 len=700 frame:-2 start:2872 end:773 gi|345493261|ref|XP_001604126.2| PREDICTED: uncharacterized protein LOC100120484 [Nasonia vitripennis]	2	1	1	2	77.359	0.0019139	0	0
>Cluster-9846.19897;orf1 len=335 frame:3 start:3 end:1007 gi|239048185|ref|NP_001155042.1| serine protease 97 precursor [Nasonia vitripennis]	1	17	17	66.8	36.252	0	281000000000	18733000000
>Cluster-9846.19914;orf1 len=732 frame:1 start:115 end:2310 gi|156548777|ref|XP_001604854.1| PREDICTED: low-density lipoprotein receptor-related protein 2-like [Nasonia vitripennis]>gi|644991873|ref|XP_008202707.1| PREDICTED: low-density lipoprotein receptor-related protein 2-like [Nasonia vitripennis];>Cluster-9846.2084;orf1 len=728 frame:3 start:1323 end:3506 gi|156548777|ref|XP_001604854.1| PR…	3	30	30	61	81.366	0	33048000000	893190000
>Cluster-9846.2238;orf1 len=471 frame:-1 start:2503 end:1091 gi|645023080|ref|XP_008202378.1| PREDICTED: zinc carboxypeptidase-like [Nasonia vitripennis];>Cluster-9846.19919;orf1 len=469 frame:-1 start:1501 end:95 gi|645023080|ref|XP_008202378.1| PREDICTED: zinc carboxypeptidase-like [Nasonia vitripennis]	2	16	16	49.8	53.493	2.5973e-280	17342000000	867090000
>Cluster-9846.19921;orf1 len=143 frame:2 start:539 end:967 gi|239735556|ref|NP_001155150.1| GOBP-like venom protein precursor [Nasonia vitripennis]>gi|355390007|emb|CCD17836.1| putative odorant binding protein 67 [Nasonia vitripennis]	1	8	8	66.9	15.799	3.2342e-196	49704000000	6213000000
>Cluster-9846.19933;orf1 len=97 frame:-1 start:398 end:108 gi|238859641|ref|NP_001155022.1| cysteine-rich/TIL venom protein 2 precursor [Nasonia vitripennis]>gi|644998009|ref|XP_008215021.1| PREDICTED: cysteine-rich/TIL venom protein 2 isoform X1 [Nasonia vitripennis]	1	3	3	33.3	10.736	1.8119e-29	3150600000	787650000
>Cluster-9846.19962;orf1 len=740 frame:-1 start:2392 end:173 gi|817080833|ref|XP_012262898.1| PREDICTED: neprilysin-like [Athalia rosae];>Cluster-9846.19961;orf1 len=303 frame:-3 start:1081 end:173 gi|769855938|ref|XP_011639545.1| PREDICTED: LOW QUALITY PROTEIN: neprilysin-like [Pogonomyrmex barbatus];>Cluster-9846.20246;orf2 len=152 frame:-1 start:2405 end:1950 gi|820851729|ref|XP_012343386.1| P…	3	15	1	22.2	86.684	1.9821e-99	4762900000	140080000
>Cluster-9846.19981;orf1 len=114 frame:-2 start:1036 end:695 gi|239787126|ref|NP_001155166.1| venom protein T precursor [Nasonia vitripennis]>gi|645009676|ref|XP_008213293.1| PREDICTED: venom protein T isoform X1 [Nasonia vitripennis]	1	3	3	33.6	13.106	2.8426e-102	12020000000	4006600000
>Cluster-9846.19987;orf1 len=1767 frame:-1 start:5302 end:2 gi|345480945|ref|XP_003424252.1| PREDICTED: uncharacterized protein LOC100680511 [Nasonia vitripennis]	1	91	91	52.7	200.3	0	91000000000	910000000
>Cluster-9846.20006;orf1 len=162 frame:1 start:262 end:747 gi|283046809|ref|NP_001164349.1| venom protein N precursor [Nasonia vitripennis]	1	3	3	19.3	18.974	1.9535e-52	19692000000	2461400000
>Cluster-9846.20071;orf1 len=327 frame:-1 start:1201 end:221 gi|645039751|ref|XP_008204599.1| PREDICTED: corticotropin-releasing factor-binding protein [Nasonia vitripennis];>Cluster-9846.20039;orf1 len=317 frame:-3 start:1171 end:221 gi|645039751|ref|XP_008204599.1| PREDICTED: corticotropin-releasing factor-binding protein [Nasonia vitripennis]	2	7	7	31.6	35.79	7.0344e-86	1720300000	101190000
>Cluster-9846.20046;orf1 len=405 frame:-3 start:1318 end:104 gi|644993820|ref|XP_001601224.2| PREDICTED: uncharacterized protein LOC100116826 [Nasonia vitripennis];>Cluster-9846.20047;orf1 len=388 frame:-3 start:1267 end:104 gi|644993820|ref|XP_001601224.2| PREDICTED: uncharacterized protein LOC100116826 [Nasonia vitripennis];>Cluster-9846.20192; len=409 start:104 end:1329; minus strand	3	11	11	33.7	44.529	2.0936e-89	9302600000	715590000
>Cluster-9846.20050;orf1 len=590 frame:2 start:2 end:1771 gi|645008813|ref|XP_008204058.1| PREDICTED: neprilysin-2-like [Nasonia vitripennis]	1	17	17	39.2	68.571	4.0986e-112	3335400000	119120000
>Cluster-9846.20054;orf1 len=264 frame:-2 start:1486 end:695 gi|340720238|ref|XP_003398548.1| PREDICTED: uncharacterized protein LOC100649303 [Bombus terrestris]	1	4	4	14.8	29.67	9.4753e-26	5444400000	453700000
>Cluster-9846.20074;orf1 len=248 frame:3 start:3 end:746 gi|33096741|emb|CAE11873.1| hypothetical protein [Homo sapiens]	1	1	1	7.7	27.624	0.0040435	0	0
>Cluster-9846.20075; len=1413 start:1 end:4236; minus strand	1	4	4	3.8	163.28	1.3876e-14	48637000	657260
>Cluster-9846.20079; len=47 start:74 end:212; minus strand	1	4	0	80.9	4.7574	8.3326e-38	78729000	19682000
>Cluster-9846.20117; len=326 start:1 end:975; minus strand	1	6	1	27.9	36.268	1.0731e-33	9527200	635140
>Cluster-9846.20124;orf1 len=200 frame:2 start:1070 end:1669 gi|239787134|ref|NP_001155170.1| venom protein U precursor [Nasonia vitripennis];>Cluster-9846.20384;orf1 len=180 frame:3 start:1197 end:1736 gi|239787134|ref|NP_001155170.1| venom protein U precursor [Nasonia vitripennis];>Cluster-9846.20383;orf1 len=52 frame:3 start:1197 end:1352 gi|239787134|ref|NP_001155170.1| venom protein U precur…	3	14	14	54.8	22.936	8.8085e-73	19064000000	1466500000
>Cluster-9846.2013;orf1 len=277 frame:1 start:550 end:1380 gi|238859623|ref|NP_001155016.1| serine protease homolog 29 precursor [Nasonia vitripennis];>Cluster-9846.2014;orf2 len=141 frame:3 start:369 end:791 gi|238859623|ref|NP_001155016.1| serine protease homolog 29 precursor [Nasonia vitripennis]	2	3	3	25.4	30.319	4.3762e-81	5837500000	972920000
>Cluster-9846.20138;orf1 len=263 frame:2 start:296 end:1084 gi|645007082|ref|XP_001605658.3| PREDICTED: chymotrypsin-2 [Nasonia vitripennis];>Cluster-9846.20152;orf1 len=251 frame:2 start:1094 end:1846 gi|645007082|ref|XP_001605658.3| PREDICTED: chymotrypsin-2 [Nasonia vitripennis];>Cluster-9846.20139;orf1 len=194 frame:2 start:809 end:1390 gi|645007082|ref|XP_001605658.3| PREDICTED: chymotrypsin…	10	16	13	60.3	28.968	1.4488e-114	22367000000	1397900000
>Cluster-9846.20156;orf1 len=93 frame:2 start:50 end:328 gi|283046793|ref|NP_001164343.1| chitin binding protein-like venom protein precursor [Nasonia vitripennis]	1	1	1	12	10.113	0.0058912	0	0
>Cluster-9846.20161;orf2 len=406 frame:-3 start:3946 end:2729 gi|156547395|ref|XP_001604042.1| PREDICTED: esterase FE4 isoform X2 [Nasonia vitripennis];>Cluster-9846.20163;orf2 len=406 frame:-3 start:4026 end:2809 gi|345481865|ref|XP_003424474.1| PREDICTED: pancreatic lipase-related protein 2-like [Nasonia vitripennis];>Cluster-9846.20164;orf2 len=406 frame:-3 start:3858 end:2641 gi|345481865|ref…	5	2	2	5.7	45.94	0.00013392	71022000	3945600
>Cluster-9846.20166;orf1 len=167 frame:-2 start:5822 end:5322 gi|644995081|ref|XP_008217335.1| PREDICTED: lipase member H-like [Nasonia vitripennis]	1	1	1	5.4	18.881	0.0016198	409830000	102460000
>Cluster-9846.20185;orf1 len=662 frame:-2 start:2339 end:354 gi|594695018|ref|XP_007194739.1| PREDICTED: 78 kDa glucose-regulated protein isoform X1 [Balaenoptera acutorostrata scammoni]>gi|594695020|ref|XP_007194740.1| PREDICTED: 78 kDa glucose-regulated protein isoform X2 [Balaenoptera acutorostrata scammoni];>Cluster-9846.2094;orf1 len=553 frame:-2 start:1661 end:3 gi|594695018|ref|XP_00719473…	2	12	8	22.7	72.98	2.3888e-52	475740000	15858000
>Cluster-9846.20206;orf1 len=690 frame:3 start:1854 end:3923 gi|645031647|ref|XP_008210187.1| PREDICTED: uncharacterized protein LOC103316723 [Nasonia vitripennis];>Cluster-9846.20207;orf1 len=690 frame:2 start:1775 end:3844 gi|645031647|ref|XP_008210187.1| PREDICTED: uncharacterized protein LOC103316723 [Nasonia vitripennis];>Cluster-9846.20208;orf1 len=690 frame:3 start:972 end:3041 gi|64503164…	8	33	18	59.9	79.717	0	44332000000	1231400000
>Cluster-9846.20209;orf1 len=48 frame:2 start:2 end:145 gi|645031647|ref|XP_008210187.1| PREDICTED: uncharacterized protein LOC103316723 [Nasonia vitripennis];>Cluster-9846.20203;orf1 len=52 frame:2 start:2 end:157 gi|645031647|ref|XP_008210187.1| PREDICTED: uncharacterized protein LOC103316723 [Nasonia vitripennis]	2	2	2	76.6	5.3098	3.56e-07	1215400000	405150000
>Cluster-9846.20214;orf1 len=709 frame:1 start:349 end:2475 gi|645031647|ref|XP_008210187.1| PREDICTED: uncharacterized protein LOC103316723 [Nasonia vitripennis];>Cluster-9846.20210;orf1 len=689 frame:3 start:420 end:2486 gi|645031647|ref|XP_008210187.1| PREDICTED: uncharacterized protein LOC103316723 [Nasonia vitripennis];>Cluster-9846.20215;orf1 len=682 frame:3 start:324 end:2369 gi|645031647|…	4	30	15	55.9	81.794	0	21251000000	643970000
>Cluster-9846.20218;orf1 len=300 frame:1 start:793 end:1692 gi|156553679|ref|XP_001599566.1| PREDICTED: ribonuclease Oy-like [Nasonia vitripennis];>Cluster-9846.20614;orf1 len=239 frame:2 start:1046 end:1762 gi|156553679|ref|XP_001599566.1| PREDICTED: ribonuclease Oy-like [Nasonia vitripennis]	2	9	9	41.1	33.92	9.307e-185	8185500000	454750000
>Cluster-9846.20240;orf1 len=140 frame:3 start:60 end:479 gi|239735556|ref|NP_001155150.1| GOBP-like venom protein precursor [Nasonia vitripennis]>gi|355390007|emb|CCD17836.1| putative odorant binding protein 67 [Nasonia vitripennis];>Cluster-9846.20264;orf1 len=140 frame:1 start:1399 end:1818 gi|239735556|ref|NP_001155150.1| GOBP-like venom protein precursor [Nasonia vitripennis]>gi|355390007|em…	3	5	5	37.4	15.866	2.6697e-128	10764000000	1076400000
>Cluster-9846.20246;orf1 len=597 frame:-2 start:1963 end:173 gi|820851729|ref|XP_012343386.1| PREDICTED: neprilysin-like isoform X1 [Apis florea]	1	15	1	28.4	69.64	5.095e-66	359540000	12841000
>Cluster-9846.20254;orf1 len=85 frame:2 start:20 end:274 gi|385251812|pdb|3TVJ|I Chain I, Catalytic Fragment Of Masp-2 In Complex With Its Specific Inhibitor Developed By Directed Evolution On Sgci Scaffold	1	1	1	15.5	9.2837	9.5588e-10	258800000	129400000
>Cluster-9846.20270;orf1 len=619 frame:3 start:69 end:1925 gi|345483383|ref|XP_001601835.2| PREDICTED: uncharacterized protein LOC100117668 [Nasonia vitripennis]	1	16	16	35.1	71.682	3.8466e-238	6610400000	220350000
>Cluster-9846.20274;orf1 len=469 frame:-2 start:1900 end:494 gi|345484421|ref|XP_003425032.1| PREDICTED: pancreatic triacylglycerol lipase-like [Nasonia vitripennis];>Cluster-9846.20276;orf1 len=403 frame:-2 start:1414 end:206 gi|345484421|ref|XP_003425032.1| PREDICTED: pancreatic triacylglycerol lipase-like [Nasonia vitripennis]	2	8	8	26.7	52.496	3.5861e-82	776310000	38815000
>Cluster-9846.20278;orf1 len=94 frame:3 start:3 end:284 gi|645031647|ref|XP_008210187.1| PREDICTED: uncharacterized protein LOC103316723 [Nasonia vitripennis]	1	3	2	45.7	10.802	6.6299e-23	197630000	39527000
>Cluster-9846.20303;orf1 len=95 frame:-3 start:286 end:2 gi|345480945|ref|XP_003424252.1| PREDICTED: uncharacterized protein LOC100680511 [Nasonia vitripennis]	1	4	4	48.4	11.264	7.1113e-21	774510000	129080000
>Cluster-9846.20305;orf1 len=531 frame:-2 start:2133 end:541 gi|156542211|ref|XP_001600327.1| PREDICTED: glucose-6-phosphate 1-dehydrogenase [Nasonia vitripennis]	1	25	25	57	60.476	1.2629e-230	22794000000	690730000
>Cluster-9846.20308;orf1 len=147 frame:-2 start:725 end:285 gi|238908532|ref|NP_001155028.1| venom protein K precursor [Nasonia vitripennis]	1	5	5	39	16.952	7.1303e-57	4582800000	509200000
>Cluster-9846.2035;orf1 len=273 frame:2 start:11 end:829 gi|156551473|ref|XP_001604991.1| PREDICTED: chymotrypsin-1 [Nasonia vitripennis]	1	2	2	7.7	29.969	0.00010146	50332000	4575600
>Cluster-9846.20351;orf2 len=300 frame:3 start:258 end:1157 gi|156544814|ref|XP_001606627.1| PREDICTED: leucine-rich repeat-containing protein 48-like [Nasonia vitripennis]	1	2	2	10.7	33.31	3.3344e-14	0	0
>Cluster-9846.20358;orf1 len=665 frame:3 start:1470 end:3464 gi|345481204|ref|XP_003424313.1| PREDICTED: LOW QUALITY PROTEIN: xaa-Pro aminopeptidase 1 [Nasonia vitripennis];>Cluster-9846.20364;orf1 len=665 frame:3 start:1470 end:3464 gi|345481204|ref|XP_003424313.1| PREDICTED: LOW QUALITY PROTEIN: xaa-Pro aminopeptidase 1 [Nasonia vitripennis]	2	26	5	43.4	76.975	5.6033e-178	7131800000	222870000
>Cluster-9846.20365;orf1 len=665 frame:3 start:1965 end:3959 gi|345481204|ref|XP_003424313.1| PREDICTED: LOW QUALITY PROTEIN: xaa-Pro aminopeptidase 1 [Nasonia vitripennis];>Cluster-9846.20363;orf1 len=641 frame:2 start:1508 end:3430 gi|345481204|ref|XP_003424313.1| PREDICTED: LOW QUALITY PROTEIN: xaa-Pro aminopeptidase 1 [Nasonia vitripennis];>Cluster-9846.1835;orf1 len=611 frame:3 start:1605 en…	4	27	1	47.1	76.425	2.1858e-193	20976000000	699210000
>Cluster-9846.20375;orf1 len=501 frame:-3 start:1616 end:114 gi|239050560|ref|NP_001155087.1| endonuclease-like venom protein precursor [Nasonia vitripennis]	1	22	22	58.4	57.882	0	57688000000	2622200000
>Cluster-9846.20386;orf1 len=534 frame:-1 start:2044 end:443 gi|156552854|ref|XP_001600149.1| PREDICTED: serine protease easter [Nasonia vitripennis]	1	14	14	32.5	58.673	5.0839e-64	9873500000	394940000
>Cluster-9846.20395;orf2 len=122 frame:-2 start:3016 end:2651 gi|644996634|ref|XP_008211047.1| PREDICTED: endothelin-converting enzyme 1-like isoform X2 [Nasonia vitripennis]	1	4	4	52.9	13.783	5.737e-29	1392900000	174120000
>Cluster-9846.20403;orf1 len=751 frame:-2 start:2589 end:337 gi|644996626|ref|XP_008211043.1| PREDICTED: endothelin-converting enzyme 1-like isoform X1 [Nasonia vitripennis]>gi|644996628|ref|XP_008211044.1| PREDICTED: endothelin-converting enzyme 1-like isoform X1 [Nasonia vitripennis]>gi|644996630|ref|XP_008211045.1| PREDICTED: endothelin-converting enzyme 1-like isoform X1 [Nasonia vitripennis]…	4	34	13	52.5	86.673	0	42041000000	1051000000
>Cluster-9846.20404;orf2 len=122 frame:-2 start:3016 end:2651 gi|644996634|ref|XP_008211047.1| PREDICTED: endothelin-converting enzyme 1-like isoform X2 [Nasonia vitripennis]	1	4	2	41.3	13.897	4.6613e-24	583250000	64805000
>Cluster-9846.20415;orf1 len=437 frame:-2 start:1813 end:503 gi|156550075|ref|XP_001605452.1| PREDICTED: venom acid phosphatase Acph-1-like [Nasonia vitripennis]>gi|645006089|ref|XP_008204320.1| PREDICTED: venom acid phosphatase Acph-1-like [Nasonia vitripennis];>Cluster-9846.20414;orf1 len=434 frame:-2 start:1501 end:200 gi|156550073|ref|XP_001605433.1| PREDICTED: venom acid phosphatase Acph-1-l…	2	1	1	1.6	50.323	0.0079796	91355000	3806400
>Cluster-9846.20428;orf1 len=968 frame:-1 start:3117 end:214 gi|345480592|ref|XP_001602131.2| PREDICTED: aminopeptidase N-like [Nasonia vitripennis]	1	22	22	24.5	111.42	3.8247e-117	1995200000	36948000
>Cluster-9846.20470;orf1 len=294 frame:-1 start:1105 end:224 gi|156547877|ref|XP_001607676.1| PREDICTED: glyoxalase domain-containing protein 4 [Nasonia vitripennis]	1	1	1	5.1	33.332	0.0010103	31589000	2256400
>Cluster-9846.2052;orf1 len=419 frame:-1 start:1523 end:267 gi|238859553|ref|NP_001154981.1| major royal jelly protein-like 3 precursor [Nasonia vitripennis]	1	6	6	18.7	47.304	1.8249e-21	247960000	10332000
>Cluster-9846.20539;orf1 len=206 frame:-1 start:903 end:286 gi|644996751|ref|XP_003426847.2| PREDICTED: putative zinc metalloproteinase T16A9.4 [Nasonia vitripennis]	1	7	4	41	23.898	5.3267e-85	1718600000	171860000
>Cluster-9846.20546;orf1 len=566 frame:-1 start:2320 end:623 gi|545840985|ref|XP_005666236.1| PREDICTED: poly [ADP-ribose] polymerase 6 isoform X5 [Sus scrofa];>Cluster-13153.0; len=343 start:1 end:1026; minus strand	2	6	6	14.9	61.436	4.6867e-18	171640000	4904100
>Cluster-9846.2059;orf1 len=248 frame:3 start:315 end:1058 gi|752867696|ref|XP_011250886.1| PREDICTED: uncharacterized protein LOC105248039 [Camponotus floridanus]	1	3	3	21.1	28.307	1.2891e-15	193680000	17607000
>Cluster-9846.20596;orf1 len=477 frame:-3 start:2268 end:838 gi|644996626|ref|XP_008211043.1| PREDICTED: endothelin-converting enzyme 1-like isoform X1 [Nasonia vitripennis]>gi|644996628|ref|XP_008211044.1| PREDICTED: endothelin-converting enzyme 1-like isoform X1 [Nasonia vitripennis]>gi|644996630|ref|XP_008211045.1| PREDICTED: endothelin-converting enzyme 1-like isoform X1 [Nasonia vitripennis]…	1	24	7	59.2	54.784	4.2353e-209	3368400000	134740000
>Cluster-9846.20604;orf1 len=194 frame:3 start:3 end:584 gi|297271677|ref|XP_001099416.2| PREDICTED: profilin-1 isoform 1 [Macaca mulatta];CON__P02584	2	4	4	29	20.32	1.1477e-12	280090000	28009000
>Cluster-9846.20608; len=396 start:302 end:1489; minus strand;>Cluster-9846.5820; len=155 start:1 end:463; minus strand;>Cluster-9846.5821; len=211 start:286 end:918; minus strand	3	9	4	25.6	42.678	4.2413e-59	691430000	40672000
>Cluster-9846.20683; len=365 start:568 end:1658; minus strand	1	3	2	10.2	39.675	7.2805e-10	33843000	1471400
>Cluster-9846.20698;orf1 len=502 frame:2 start:2 end:1507 gi|645016953|ref|XP_008211701.1| PREDICTED: A disintegrin and metalloproteinase with thrombospondin motifs 17 [Nasonia vitripennis]	1	12	12	33.5	57.166	8.6523e-129	1475300000	56741000
>Cluster-9846.20700;orf2 len=46 frame:3 start:375 end:512 gi|645011286|ref|XP_003424305.2| PREDICTED: uncharacterized protein LOC100679481 isoform X1 [Nasonia vitripennis]	1	1	1	24.4	5.1427	0.00047674	176200000	44050000
>Cluster-9846.20700;orf3 len=107 frame:2 start:2 end:322 gi|645011286|ref|XP_003424305.2| PREDICTED: uncharacterized protein LOC100679481 isoform X1 [Nasonia vitripennis]	1	3	3	28.3	12.204	1.0152e-09	384830000	42759000
>Cluster-9846.2076;orf1 len=463 frame:1 start:1 end:1389 gi|345480945|ref|XP_003424252.1| PREDICTED: uncharacterized protein LOC100680511 [Nasonia vitripennis]	1	11	9	27.3	52.806	1.6878e-65	1210100000	55005000
>Cluster-9846.20767;orf2 len=513 frame:-1 start:2386 end:848 gi|20070125|ref|NP_000909.2| protein disulfide-isomerase precursor [Homo sapiens]>gi|2507460|sp|P07237.3|PDIA1_HUMAN RecName: Full=Protein disulfide-isomerase; Short=PDI; AltName: Full=Cellular thyroid hormone-binding protein; AltName: Full=Prolyl 4-hydroxylase subunit beta; AltName: Full=p55; Flags: Precursor>gi|190384|gb|AAC13652.1| p…	3	8	8	17.4	57.504	4.4263e-27	302770000	8410300
>Cluster-9846.20775; len=457 start:1 end:1371; minus strand;>Cluster-14756.1;orf1 len=104 frame:-3 start:313 end:2 gi|556745557|ref|XP_005985783.1| PREDICTED: LOW QUALITY PROTEIN: heat shock 70kDa protein 8 [Pantholops hodgsonii];>Cluster-9846.20913; len=84 start:66 end:317; minus strand;>Cluster-14756.2; len=153 start:1 end:457; minus strand	4	11	4	30.2	50.3	7.1531e-43	275650000	11026000
>Cluster-9846.20781;orf1 len=229 frame:2 start:2 end:688 gi|645019128|ref|XP_008206401.1| PREDICTED: uncharacterized protein LOC103316135 [Nasonia vitripennis]	1	11	8	53.5	25.683	2.4236e-52	3471200000	204190000
>Cluster-9846.2080;orf1 len=454 frame:-2 start:1914 end:553 gi|805792902|ref|XP_012142357.1| PREDICTED: kynurenine--oxoglutarate transaminase 3 [Megachile rotundata]>gi|805792905|ref|XP_012142358.1| PREDICTED: kynurenine--oxoglutarate transaminase 3 [Megachile rotundata]>gi|805792908|ref|XP_012142359.1| PREDICTED: kynurenine--oxoglutarate transaminase 3 [Megachile rotundata]>gi|805792911|ref|XP_0…	3	15	15	34.7	51.848	7.9454e-104	18425000000	877370000
>Cluster-9846.20832;orf1 len=671 frame:3 start:114 end:2126 gi|645019128|ref|XP_008206401.1| PREDICTED: uncharacterized protein LOC103316135 [Nasonia vitripennis];>Cluster-9846.20833;orf2 len=638 frame:3 start:114 end:2027 gi|645019128|ref|XP_008206401.1| PREDICTED: uncharacterized protein LOC103316135 [Nasonia vitripennis];>Cluster-9846.21621;orf2 len=581 frame:3 start:114 end:1856 gi|645019128|…	7	13	13	24	77.563	5.9194e-46	651680000	18619000
>Cluster-9846.20837;orf1 len=292 frame:3 start:6 end:881 gi|283046805|ref|NP_001164348.1| serine protease precursor [Nasonia vitripennis]	1	15	15	61.5	32.791	1.0795e-268	31632000000	2259400000
>Cluster-9846.20959;orf1 len=395 frame:-1 start:1539 end:355 gi|156541186|ref|XP_001600770.1| PREDICTED: venom acid phosphatase Acph-1-like [Nasonia vitripennis];>Cluster-9846.1537;orf1 len=338 frame:-3 start:1368 end:355 gi|156541186|ref|XP_001600770.1| PREDICTED: venom acid phosphatase Acph-1-like [Nasonia vitripennis];>Cluster-9846.1449;orf1 len=99 frame:-1 start:1675 end:1379 gi|156541186|ref…	3	13	13	56.1	45.241	3.3556e-243	11080000000	615540000
>Cluster-9846.21015;orf1 len=673 frame:2 start:197 end:2215 gi|156545175|ref|XP_001603409.1| PREDICTED: uncharacterized protein LOC100119678 [Nasonia vitripennis]	1	20	20	39.7	76.629	7.1633e-272	10461000000	249070000
>Cluster-9846.21029;orf1 len=270 frame:2 start:317 end:1126 gi|645007082|ref|XP_001605658.3| PREDICTED: chymotrypsin-2 [Nasonia vitripennis];>Cluster-9846.2189;orf1 len=270 frame:2 start:473 end:1282 gi|645007082|ref|XP_001605658.3| PREDICTED: chymotrypsin-2 [Nasonia vitripennis]	2	16	12	59.9	29.89	1.2811e-110	13998000000	777640000
>Cluster-9846.21038;orf1 len=379 frame:-1 start:1508 end:372 gi|820857060|ref|XP_012345672.1| PREDICTED: actin, clone 205-like isoform X1 [Apis florea]	1	18	0	59.8	42.049	5.4802e-180	31293000000	1564600000
>Cluster-9846.21047;orf1 len=588 frame:1 start:43 end:1806 gi|589949531|ref|XP_006987423.1| PREDICTED: ATP synthase subunit beta, mitochondrial [Peromyscus maniculatus bairdii]	1	5	1	14	62.889	2.122e-59	132350000	4136000
>Cluster-9846.21054;orf1 len=380 frame:2 start:167 end:1306 gi|288869489|ref|NP_001165852.1| cuticular protein analogous to peritrophins 3-E precursor [Nasonia vitripennis];>Cluster-9846.5948;orf2 len=380 frame:2 start:167 end:1306 gi|156537165|ref|XP_001603914.1| PREDICTED: dysbindin protein homolog [Nasonia vitripennis];>Cluster-9846.6852;orf2 len=344 frame:2 start:281 end:1312 gi|288869489|ref…	4	2	2	7.7	43.684	1.2401e-05	40101000	2358900
>Cluster-9846.21057; len=471 start:379 end:1787; minus strand	1	2	2	6.4	50.621	3.0414e-06	79613000	3791100
>Cluster-9846.21075;orf1 len=335 frame:3 start:3 end:1007 gi|397500776|ref|XP_003821081.1| PREDICTED: hepatoma-derived growth factor isoform X2 [Pan paniscus]>gi|426332106|ref|XP_004027033.1| PREDICTED: hepatoma-derived growth factor isoform 1 [Gorilla gorilla gorilla]>gi|694889535|ref|XP_009432868.1| PREDICTED: hepatoma-derived growth factor [Pan troglodytes]	1	1	1	4.8	36.248	0.0020545	49490000	2356700
>Cluster-9846.21100; len=116 start:84 end:431; minus strand	1	1	1	7.8	12.476	0.0038804	32622000	6524300
>Cluster-9846.21107;orf1 len=627 frame:-3 start:4166 end:2286 gi|829891971|ref|XP_012645399.1| PREDICTED: calnexin isoform X3 [Microcebus murinus]	1	3	3	7.8	71.032	1.2838e-13	64545000	1844100
>Cluster-9846.21126;orf1 len=736 frame:3 start:3 end:2210 gi|644996626|ref|XP_008211043.1| PREDICTED: endothelin-converting enzyme 1-like isoform X1 [Nasonia vitripennis]>gi|644996628|ref|XP_008211044.1| PREDICTED: endothelin-converting enzyme 1-like isoform X1 [Nasonia vitripennis]>gi|644996630|ref|XP_008211045.1| PREDICTED: endothelin-converting enzyme 1-like isoform X1 [Nasonia vitripennis]>gi…	2	19	19	31.7	84.938	4.3959e-126	6247300000	215420000
>Cluster-9846.21182;orf1 len=536 frame:-1 start:1712 end:105 gi|645000552|ref|XP_008216026.1| PREDICTED: vanin-like protein 2 [Nasonia vitripennis];>Cluster-9846.19963;orf2 len=421 frame:-1 start:1771 end:509 gi|645000552|ref|XP_008216026.1| PREDICTED: vanin-like protein 2 [Nasonia vitripennis];>Cluster-9846.19963;orf1 len=152 frame:-3 start:560 end:105 gi|645000552|ref|XP_008216026.1| PREDICTED:…	3	4	4	12	60.294	8.918e-22	275560000	11981000
>Cluster-9846.21198;orf1 len=435 frame:2 start:524 end:1828 gi|645013369|ref|XP_008216710.1| PREDICTED: lipase 3-like [Nasonia vitripennis];>Cluster-9846.21199;orf1 len=435 frame:2 start:524 end:1828 gi|645013041|ref|XP_008216579.1| PREDICTED: lipase 3-like [Nasonia vitripennis];>Cluster-9846.21200;orf1 len=435 frame:2 start:524 end:1828 gi|645013369|ref|XP_008216710.1| PREDICTED: lipase 3-like […	7	12	12	32.3	48.965	3.59e-184	3767200000	198280000
>Cluster-9846.21200;orf2 len=443 frame:3 start:2403 end:3731 gi|645013369|ref|XP_008216710.1| PREDICTED: lipase 3-like [Nasonia vitripennis];>Cluster-9846.21205;orf1 len=412 frame:1 start:2830 end:4065 gi|645013041|ref|XP_008216579.1| PREDICTED: lipase 3-like [Nasonia vitripennis];>Cluster-9846.21201;orf2 len=189 frame:3 start:3339 end:3905 gi|645013369|ref|XP_008216710.1| PREDICTED: lipase 3-lik…	3	2	2	5.7	50.699	1.7182e-09	35740000	1624500
>Cluster-9846.21233;orf1 len=262 frame:3 start:30 end:815 gi|49119653|gb|AAH73141.1| YWHAZ protein, partial [Homo sapiens]	1	4	2	21.1	29.464	1.3437e-26	106190000	7079300
>Cluster-9846.2126;orf1 len=123 frame:-3 start:471 end:103 gi|238908534|ref|NP_001155029.1| venom protein L precursor [Nasonia vitripennis]	1	4	4	38.5	14.314	3.5177e-59	12655000000	2109200000
>Cluster-9846.2140;orf1 len=407 frame:3 start:3 end:1223 gi|645040826|ref|XP_008212919.1| PREDICTED: pancreatic triacylglycerol lipase-like [Nasonia vitripennis];>Cluster-9846.2027;orf2 len=268 frame:2 start:641 end:1444 gi|645040826|ref|XP_008212919.1| PREDICTED: pancreatic triacylglycerol lipase-like [Nasonia vitripennis];>Cluster-9846.4229;orf1 len=263 frame:3 start:3 end:791 gi|645040826|ref|…	4	8	8	22.9	45.864	3.0113e-55	1907000000	82914000
>Cluster-9846.21402; len=103 start:440 end:750; minus strand	1	4	4	48	11.222	3.7616e-27	4091000000	511370000
>Cluster-9846.21571;orf1 len=417 frame:-2 start:1252 end:2 gi|4507947|ref|NP_003671.1| tyrosine--tRNA ligase, cytoplasmic [Homo sapiens]>gi|13638438|sp|P54577.4|SYYC_HUMAN RecName: Full=Tyrosine--tRNA ligase, cytoplasmic; AltName: Full=Tyrosyl-tRNA synthetase; Short=TyrRS; Contains: RecName: Full=Tyrosine--tRNA ligase, cytoplasmic, N-terminally processed>gi|2665519|gb|AAB88409.1| tyrosyl-tRNA syn…	1	1	1	3.1	46.277	0.000508	13358000	445270
>Cluster-9846.2167;orf1 len=70 frame:2 start:290 end:499 gi|645013992|ref|XP_008205343.1| PREDICTED: gastric triacylglycerol lipase-like, partial [Nasonia vitripennis]	1	1	1	13	7.7947	0.0022982	494430000	164810000
>Cluster-9846.2167;orf2 len=306 frame:3 start:534 end:1451 gi|645013992|ref|XP_008205343.1| PREDICTED: gastric triacylglycerol lipase-like, partial [Nasonia vitripennis]	1	7	7	23.9	35.322	1.2892e-27	4791000000	435540000
>Cluster-9846.2170;orf1 len=129 frame:3 start:123 end:509 gi|645017586|ref|XP_003426464.2| PREDICTED: uncharacterized protein LOC100679170 [Nasonia vitripennis]	1	4	4	50	14.311	1.1611e-95	4289900000	1430000000
>Cluster-9846.21702; len=222 start:239 end:902; minus strand	1	1	1	4.5	24.185	0.00063582	33861000	3078200
>Cluster-9846.21705; len=172 start:143 end:658; minus strand;>Cluster-9846.21704; len=171 start:158 end:670; minus strand	2	3	1	31.6	18.825	1.4578e-23	0	0
>Cluster-9846.21728;orf1 len=308 frame:3 start:159 end:1082 gi|644994139|ref|XP_008214285.1| PREDICTED: chymotrypsin-1-like [Nasonia vitripennis]	1	11	11	54.4	33.874	9.1713e-83	1253000000	113910000
>Cluster-9846.218;orf1 len=571 frame:-3 start:1935 end:223 gi|795471960|ref|XP_011768118.1| PREDICTED: T-complex protein 1 subunit gamma isoform X1 [Macaca nemestrina];>Cluster-23479.0;orf1 len=168 frame:3 start:3 end:506 gi|733932295|ref|XP_010726681.1| PREDICTED: T-complex protein 1 subunit gamma [Meleagris gallopavo]	2	2	2	3.9	62.9	2.0661e-06	26600000	806060
>Cluster-9846.2180;orf1 len=276 frame:-1 start:1318 end:491 gi|289329741|ref|NP_001166082.1| serine protease 64 precursor [Nasonia vitripennis]	1	7	7	32	31.248	1.2557e-57	5273700000	439470000
>Cluster-9846.21820;orf1 len=319 frame:-1 start:1350 end:394 gi|820970200|ref|XP_012356206.1| PREDICTED: acidic leucine-rich nuclear phosphoprotein 32 family member B isoform X3 [Nomascus leucogenys];>Cluster-9846.741;orf1 len=311 frame:-1 start:1326 end:394 gi|820970200|ref|XP_012356206.1| PREDICTED: acidic leucine-rich nuclear phosphoprotein 32 family member B isoform X3 [Nomascus leucogenys];>…	3	2	2	7.5	35.945	6.2647e-05	9938900	828250
>Cluster-9846.21841;orf1 len=457 frame:1 start:1 end:1371 gi|554556994|ref|XP_005872923.1| PREDICTED: phosphoglycerate kinase 1 [Myotis brandtii]	1	4	4	11.4	48.606	6.3869e-11	209850000	6994900
>Cluster-9846.2190;orf1 len=111 frame:3 start:69 end:401 gi|645017438|ref|XP_008206613.1| PREDICTED: venom protein H isoform X1 [Nasonia vitripennis]	1	2	2	15.5	12.696	1.2459e-09	1857600000	464400000
>Cluster-9846.348;orf1 len=314 frame:3 start:171 end:1112 gi|62088634|dbj|BAD92764.1| Heterogeneous nuclear ribonucleoproteins C1/C2 variant [Homo sapiens];>Cluster-9846.21907; len=294 start:166 end:1047; minus strand;>Cluster-9846.349; len=294 start:192 end:1073; minus strand	3	2	2	7	34.412	3.6135e-12	10592000	623090
>Cluster-9846.2193;orf1 len=832 frame:-3 start:2496 end:1 gi|620981748|ref|XP_001515708.3| PREDICTED: elongation factor 2 [Ornithorhynchus anatinus];>Cluster-22679.0;orf1 len=848 frame:2 start:170 end:2713 gi|470420396|ref|XP_004337289.1| eukaryotic translation elongation factor 2, putative [Acanthamoeba castellanii str. Neff]>gi|440794105|gb|ELR15276.1| eukaryotic translation elongation factor 2…	9	7	4	9.7	92.335	5.922e-23	27477000	638990
>Cluster-9846.222;orf1 len=225 frame:1 start:25 end:699 gi|795270732|ref|XP_011857274.1| PREDICTED: peroxiredoxin-1 isoform X1 [Mandrillus leucophaeus];>Cluster-9846.220;orf1 len=222 frame:3 start:3 end:668 gi|795270732|ref|XP_011857274.1| PREDICTED: peroxiredoxin-1 isoform X1 [Mandrillus leucophaeus];>Cluster-16155.0; len=101 start:298 end:600; minus strand	3	3	2	17.9	24.866	5.6986e-12	109480000	6440000
>Cluster-9846.22003;orf1 len=660 frame:3 start:3 end:1982 gi|345498449|ref|XP_001607488.2| PREDICTED: gamma-glutamyltranspeptidase 1 [Nasonia vitripennis]	1	23	23	41.1	72.806	0	80849000000	2526500000
>Cluster-9846.22028;orf1 len=444 frame:2 start:659 end:1990 gi|345498278|ref|XP_001606746.2| PREDICTED: venom metalloproteinase 2-like [Nasonia vitripennis];>Cluster-9846.22026;orf1 len=402 frame:2 start:659 end:1864 gi|345498278|ref|XP_001606746.2| PREDICTED: venom metalloproteinase 2-like [Nasonia vitripennis];>Cluster-9846.22027;orf1 len=352 frame:2 start:1004 end:2059 gi|345498278|ref|XP_0016…	5	13	13	24.6	51.207	8.143e-52	5134700000	233390000
>Cluster-9846.2215;orf1 len=431 frame:3 start:240 end:1532 gi|645037175|ref|XP_008217192.1| PREDICTED: venom acid phosphatase Acph-1-like [Nasonia vitripennis];>Cluster-9846.2216;orf2 len=372 frame:2 start:533 end:1648 gi|645037175|ref|XP_008217192.1| PREDICTED: venom acid phosphatase Acph-1-like [Nasonia vitripennis];>Cluster-23034.0;orf1 len=387 frame:-3 start:1410 end:250 gi|645013939|ref|XP_0…	3	5	5	15.6	49.762	1.4126e-18	145330000	6605900
>Cluster-9846.2223;orf1 len=130 frame:-1 start:390 end:1 gi|156546152|ref|XP_001603117.1| PREDICTED: serine proteinase stubble isoform X1 [Nasonia vitripennis]	1	3	3	33.1	14.209	4.2328e-23	15701000000	3140200000
>Cluster-9846.2224;orf1 len=340 frame:2 start:2 end:1021 gi|156546152|ref|XP_001603117.1| PREDICTED: serine proteinase stubble isoform X1 [Nasonia vitripennis]	1	12	12	52.8	35.893	1.1319e-197	56679000000	4048500000
>Cluster-9846.2248;orf1 len=125 frame:1 start:34 end:408 gi|295293072|ref|NP_001171239.1| nabaecin-1 precursor [Nasonia vitripennis]>gi|291220451|gb|ADD84771.1| nabaecin-1 precursor [Nasonia vitripennis]	1	6	6	40.3	13.627	3.9698e-124	26635000000	3329400000
>Cluster-9846.2256;orf1 len=180 frame:-1 start:654 end:115 gi|239787116|ref|NP_001155161.1| venom protein Q precursor [Nasonia vitripennis]	1	10	10	40.2	20.314	2.1161e-132	149470000000	14947000000
>Cluster-9846.2266;orf1 len=173 frame:-1 start:1628 end:1110 gi|239048037|ref|NP_001155041.1| venom protein V precursor [Nasonia vitripennis]	1	12	12	50	19.731	3.0034e-152	121710000000	13523000000
>Cluster-9846.2323;orf1 len=114 frame:1 start:121 end:462 gi|156552930|ref|XP_001601837.1| PREDICTED: uncharacterized protein LOC100117670 [Nasonia vitripennis]	1	1	1	9.7	12.852	0.0039165	30857000	4408200
>Cluster-9846.2368;orf1 len=342 frame:-2 start:2917 end:1892 gi|322794521|gb|EFZ17572.1| hypothetical protein SINV_07657, partial [Solenopsis invicta]	1	4	4	15.5	39.907	6.8992e-10	89814000	4727100
>Cluster-9846.2475;orf1 len=205 frame:3 start:1887 end:2501 gi|156541342|ref|XP_001599037.1| PREDICTED: acidic endochitinase SP2-like [Nasonia vitripennis]	1	4	3	28.9	22.639	1.5717e-26	204630000	15740000
>Cluster-9846.2475;orf2 len=218 frame:2 start:134 end:787 gi|156541342|ref|XP_001599037.1| PREDICTED: acidic endochitinase SP2-like [Nasonia vitripennis]	1	10	9	70	23.849	2.3493e-183	6461300000	587390000
>Cluster-9846.2637;orf1 len=751 frame:2 start:2096 end:4348 gi|645016953|ref|XP_008211701.1| PREDICTED: A disintegrin and metalloproteinase with thrombospondin motifs 17 [Nasonia vitripennis]	1	22	22	35.5	85.772	2.9305e-212	7009200000	206150000
>Cluster-9846.284;orf1 len=264 frame:1 start:1 end:792 gi|820999715|ref|XP_012354850.1| PREDICTED: rab GDP dissociation inhibitor beta isoform X3 [Nomascus leucogenys]>gi|119606836|gb|EAW86430.1| GDP dissociation inhibitor 2, isoform CRA_a [Homo sapiens]	1	1	1	5.7	29.917	0.0082884	0	0
>Cluster-9846.2889;orf1 len=1569 frame:-2 start:4923 end:217 gi|345491078|ref|XP_001606130.2| PREDICTED: vitellogenin-6-like [Nasonia vitripennis]	1	1	1	1.2	181.05	0.0035156	0	0
>Cluster-9846.32;orf1 len=440 frame:-1 start:1587 end:268 gi|156545818|ref|XP_001606066.1| PREDICTED: serine protease easter [Nasonia vitripennis]	1	11	11	34.6	49.066	8.0035e-115	1128600000	56431000
>Cluster-9846.3287;orf1 len=229 frame:3 start:3 end:689 gi|345496829|ref|XP_003427829.1| PREDICTED: histone H1-like [Nasonia vitripennis]	1	2	1	11	23.043	1.0203e-05	59244000	9874000
>Cluster-9846.3605;orf1 len=738 frame:1 start:448 end:2661 gi|345479731|ref|XP_003424017.1| PREDICTED: peroxisomal acyl-coenzyme A oxidase 3 isoform X2 [Nasonia vitripennis];>Cluster-9846.3606;orf1 len=738 frame:1 start:325 end:2538 gi|345479731|ref|XP_003424017.1| PREDICTED: peroxisomal acyl-coenzyme A oxidase 3 isoform X2 [Nasonia vitripennis];>Cluster-9846.3607;orf1 len=738 frame:1 start:439 e…	3	1	1	1.8	82.776	0.0056347	0	0
>Cluster-9846.3630;orf1 len=416 frame:1 start:271 end:1518 gi|645012364|ref|XP_003426760.2| PREDICTED: venom acid phosphatase Acph-1-like isoform X2 [Nasonia vitripennis];>Cluster-9846.3629;orf1 len=406 frame:2 start:2117 end:3334 gi|645012364|ref|XP_003426760.2| PREDICTED: venom acid phosphatase Acph-1-like isoform X2 [Nasonia vitripennis];>Cluster-9846.3628;orf2 len=389 frame:3 start:2085 end:3…	4	8	8	23.6	48.786	2.8974e-43	1840500000	96871000
>Cluster-9846.3724;orf1 len=192 frame:-3 start:1010 end:435 gi|350408056|ref|XP_003488287.1| PREDICTED: troponin C isoform X1 [Bombus impatiens]	1	8	8	47.1	21.277	1.2669e-119	3986300000	362390000
>Cluster-9846.3874;orf1 len=252 frame:3 start:93 end:848 gi|288856259|ref|NP_001165785.1| NADH dehydrogenase [ubiquinone] flavoprotein 2, mitochondrial [Nasonia vitripennis]	1	4	4	23.5	27.962	6.1267e-17	239530000	15969000
>Cluster-9846.3892;orf1 len=509 frame:-2 start:1899 end:373 gi|749778544|ref|XP_011143963.1| PREDICTED: fumarate hydratase, mitochondrial-like isoform X1 [Harpegnathos saltator];>Cluster-9846.3896;orf1 len=468 frame:-1 start:1776 end:373 gi|759067567|ref|XP_011343259.1| PREDICTED: fumarate hydratase, mitochondrial-like isoform X1 [Cerapachys biroi]>gi|607357094|gb|EZA51565.1| Fumarate hydratase, …	4	8	8	24.8	54.683	2.8673e-65	304740000	10508000
>Cluster-9846.3987;orf1 len=1649 frame:-3 start:5671 end:725 gi|645002051|ref|XP_008209807.1| PREDICTED: restin homolog isoform X3 [Nasonia vitripennis];>Cluster-9846.3985;orf1 len=1626 frame:-3 start:5602 end:725 gi|345494045|ref|XP_001606131.2| PREDICTED: restin homolog isoform X2 [Nasonia vitripennis];>Cluster-9846.3984;orf2 len=880 frame:-3 start:5624 end:2985 gi|645002053|ref|XP_008209808.1|…	3	1	1	1	189.13	2.3139e-07	72759000	734940
>Cluster-9846.4074;orf1 len=284 frame:-2 start:3223 end:2372 gi|766935525|ref|XP_011500130.1| PREDICTED: venom acid phosphatase Acph-1-like, partial [Ceratosolen solmsi marchali]	1	3	3	14.1	32.558	1.0749e-25	696950000	49782000
>Cluster-9846.4074;orf2 len=111 frame:-3 start:2394 end:2062 gi|766935525|ref|XP_011500130.1| PREDICTED: venom acid phosphatase Acph-1-like, partial [Ceratosolen solmsi marchali]	1	4	4	49.1	12.669	2.5551e-17	531870000	106370000
>Cluster-9846.4164;orf1 len=134 frame:1 start:343 end:744 gi|156547891|ref|XP_001608047.1| PREDICTED: fatty acid-binding protein, muscle isoform X2 [Nasonia vitripennis]	1	3	1	34.6	15.117	1.1948e-33	302730000	37841000
>Cluster-9846.43;orf1 len=196 frame:-1 start:588 end:1 gi|645008813|ref|XP_008204058.1| PREDICTED: neprilysin-2-like [Nasonia vitripennis];>Cluster-9846.42;orf1 len=164 frame:-3 start:492 end:1 gi|645008813|ref|XP_008204058.1| PREDICTED: neprilysin-2-like [Nasonia vitripennis]	2	1	1	6.1	22.902	9.6274e-12	217240000	21724000
>Cluster-9846.427;orf1 len=417 frame:-2 start:1768 end:518 gi|675672746|ref|XP_009000503.1| PREDICTED: heterogeneous nuclear ribonucleoproteins A2/B1 isoform X1 [Callithrix jacchus]>gi|675672750|ref|XP_009000504.1| PREDICTED: heterogeneous nuclear ribonucleoproteins A2/B1 isoform X1 [Callithrix jacchus];>Cluster-9846.424;orf1 len=405 frame:-2 start:1823 end:609 gi|148666221|gb|EDK98637.1| mCG1191…	3	2	2	6	43.746	6.7323e-07	102620000	4461800
>Cluster-9846.4310;orf1 len=329 frame:3 start:21 end:1007 gi|197245384|ref|NP_001127792.1| glyoxylate reductase/hydroxypyruvate reductase-like [Nasonia vitripennis];>Cluster-9846.5721;orf1 len=301 frame:3 start:21 end:923 gi|197245384|ref|NP_001127792.1| glyoxylate reductase/hydroxypyruvate reductase-like [Nasonia vitripennis]	2	1	1	4.9	35.932	0.004413	0	0
>Cluster-9846.432;orf1 len=382 frame:2 start:71 end:1216 gi|645022043|ref|XP_003427888.2| PREDICTED: pancreatic triacylglycerol lipase-like [Nasonia vitripennis]	1	14	14	42.8	43.529	1.1792e-166	15332000000	901900000
>Cluster-9846.440;orf1 len=163 frame:3 start:120 end:608 gi|288856335|ref|NP_001165818.1| ATP synthase subunit delta, mitochondrial [Nasonia vitripennis]>gi|288856337|ref|NP_001165819.1| ATP synthase subunit delta, mitochondrial [Nasonia vitripennis]	1	7	7	75.9	17.258	6.1063e-106	1359100000	194150000
>Cluster-9846.4484;orf1 len=730 frame:-1 start:2350 end:161 gi|269784689|ref|NP_001161447.1| NADH-ubiquinone oxidoreductase 75 kDa subunit, mitochondrial [Nasonia vitripennis];>Cluster-9846.4483;orf1 len=727 frame:-3 start:2341 end:161 gi|269784689|ref|NP_001161447.1| NADH-ubiquinone oxidoreductase 75 kDa subunit, mitochondrial [Nasonia vitripennis]	2	17	17	30.3	80.932	9.1623e-115	724630000	16103000
>Cluster-9846.456;orf1 len=488 frame:1 start:1 end:1464 gi|644993820|ref|XP_001601224.2| PREDICTED: uncharacterized protein LOC100116826 [Nasonia vitripennis]	1	15	15	41.7	54.479	4.3918e-151	2920400000	132750000
>Cluster-9846.4576;orf1 len=770 frame:-2 start:2479 end:170 gi|766928854|ref|XP_011496492.1| PREDICTED: trifunctional enzyme subunit alpha, mitochondrial [Ceratosolen solmsi marchali];>Cluster-9846.5604;orf1 len=770 frame:-2 start:2479 end:170 gi|766928854|ref|XP_011496492.1| PREDICTED: trifunctional enzyme subunit alpha, mitochondrial [Ceratosolen solmsi marchali]	2	5	5	7.9	83.226	7.7809e-20	129980000	2954100
>Cluster-9846.474;orf1 len=320 frame:-1 start:1814 end:855 gi|823417697|ref|XP_012419592.1| PREDICTED: voltage-dependent anion-selective channel protein 1 isoform X1 [Odobenus rosmarus divergens]	1	1	1	6.3	34.142	0.01049	16677000	877740
>Cluster-9846.4747;orf1 len=127 frame:3 start:471 end:851 gi|288856309|ref|NP_001165807.1| cytochrome b-c1 complex subunit 7 [Nasonia vitripennis]	1	2	2	17.5	15.386	7.8269e-20	69005000	9857900
>Cluster-9846.475;orf1 len=289 frame:1 start:1 end:867 gi|5803225|ref|NP_006752.1| 14-3-3 protein epsilon [Homo sapiens]>gi|27806197|ref|NP_776916.1| 14-3-3 protein epsilon [Bos taurus]>gi|55741616|ref|NP_001006219.1| 14-3-3 protein epsilon [Gallus gallus]>gi|226874906|ref|NP_033562.3| 14-3-3 protein epsilon [Mus musculus]>gi|350539099|ref|NP_001233297.1| 14-3-3 protein epsilon [Pan troglodytes]>…	1	4	1	17	32.628	5.7449e-28	18443000	970690
>Cluster-9846.505;orf1 len=379 frame:-3 start:1322 end:186 gi|766925919|ref|XP_011494874.1| PREDICTED: lipase member I-like [Ceratosolen solmsi marchali]	1	11	11	43.4	42.682	5.1257e-171	2008000000	91274000
>Cluster-9846.5210;orf1 len=496 frame:2 start:275 end:1762 gi|156552806|ref|XP_001599572.1| PREDICTED: serine--tRNA ligase, cytoplasmic [Nasonia vitripennis]	1	1	1	3.2	56.847	0.006825	0	0
>Cluster-9846.5291;orf1 len=192 frame:2 start:2 end:577 gi|268607734|ref|NP_001161323.1| acyl carrier protein, mitochondrial isoform 3 [Nasonia vitripennis]	1	1	1	4.7	21.177	0.0018252	205380000	34231000
>Cluster-9846.5326;orf1 len=348 frame:-1 start:1589 end:546 gi|345491707|ref|XP_001608058.2| PREDICTED: fumarylacetoacetate hydrolase domain-containing protein 2A [Nasonia vitripennis]	1	3	3	11	38.287	3.3696e-07	101880000	5093800
>Cluster-9846.5366;orf1 len=237 frame:-3 start:780 end:70 gi|345496829|ref|XP_003427829.1| PREDICTED: histone H1-like [Nasonia vitripennis]	1	3	2	13.6	24.339	2.7808e-07	588700000	117740000
>Cluster-9846.5415;orf1 len=238 frame:-3 start:907 end:194 gi|156537888|ref|XP_001608125.1| PREDICTED: histone H1-like [Nasonia vitripennis]	1	2	1	8.4	24.387	6.5845e-05	45864000	6552000
>Cluster-9846.5449;orf1 len=491 frame:3 start:408 end:1880 gi|350426198|ref|XP_003494364.1| PREDICTED: dihydrolipoyllysine-residue acetyltransferase component of pyruvate dehydrogenase complex, mitochondrial [Bombus impatiens]>gi|815927851|ref|XP_012248440.1| PREDICTED: dihydrolipoyllysine-residue acetyltransferase component of pyruvate dehydrogenase complex, mitochondrial [Bombus impatiens]	1	11	11	41	52.191	5.6508e-62	1047400000	40286000
>Cluster-9846.5468;orf1 len=103 frame:2 start:2 end:310 gi|644992648|ref|XP_008202956.1| PREDICTED: glycerol-3-phosphate dehydrogenase [NAD(+)], cytoplasmic isoform X3 [Nasonia vitripennis];>Cluster-9846.5950;orf1 len=81 frame:2 start:2 end:244 gi|644992648|ref|XP_008202956.1| PREDICTED: glycerol-3-phosphate dehydrogenase [NAD(+)], cytoplasmic isoform X3 [Nasonia vitripennis]	2	3	3	35	11.191	1.1884e-07	120170000	15021000
>Cluster-9846.5469;orf1 len=432 frame:2 start:1439 end:2734 gi|644992648|ref|XP_008202956.1| PREDICTED: glycerol-3-phosphate dehydrogenase [NAD(+)], cytoplasmic isoform X3 [Nasonia vitripennis];>Cluster-9846.5951;orf1 len=429 frame:2 start:2 end:1288 gi|644992648|ref|XP_008202956.1| PREDICTED: glycerol-3-phosphate dehydrogenase [NAD(+)], cytoplasmic isoform X3 [Nasonia vitripennis]	2	4	2	11.1	47.501	2.5469e-11	97765000	3910600
>Cluster-9846.5495; len=69 start:1 end:206; minus strand	1	2	1	26.1	7.5565	8.0597e-05	86066000	14344000
>Cluster-9846.5526;orf1 len=223 frame:-3 start:837 end:169 gi|156551249|ref|XP_001606770.1| PREDICTED: LDLR chaperone boca [Nasonia vitripennis]	1	1	1	5	25.663	0.0014826	0	0
>Cluster-9846.5599;orf1 len=260 frame:2 start:2 end:781 gi|645006304|ref|XP_008204417.1| PREDICTED: microtubule-associated protein futsch-like [Nasonia vitripennis]	1	4	4	14.6	29.033	7.028e-07	47837000	3189100
>Cluster-9846.5611; len=183 start:147 end:695; minus strand	1	4	4	22.5	20.311	2.8537e-91	124640000	9587400
>Cluster-9846.5661;orf1 len=278 frame:2 start:134 end:967 gi|645024502|ref|XP_008213876.1| PREDICTED: triosephosphate isomerase isoform X1 [Nasonia vitripennis];>Cluster-9846.8790;orf1 len=272 frame:1 start:82 end:897 gi|752883136|ref|XP_011259256.1| PREDICTED: triosephosphate isomerase [Camponotus floridanus]>gi|307177170|gb|EFN66403.1| Triosephosphate isomerase [Camponotus floridanus]	2	7	7	30	30.285	1.3229e-39	618940000	41262000
>Cluster-9846.5667;orf1 len=475 frame:-2 start:2378 end:954 gi|644997766|ref|XP_008208315.1| PREDICTED: serine proteinase stubble-like [Nasonia vitripennis]	1	1	1	2.5	51.518	0.00097856	0	0
>Cluster-9846.5733;orf1 len=320 frame:1 start:319 end:1278 gi|156542532|ref|XP_001599934.1| PREDICTED: regucalcin-like [Nasonia vitripennis]>gi|345478834|ref|XP_003423819.1| PREDICTED: regucalcin-like [Nasonia vitripennis]>gi|645023831|ref|XP_008210244.1| PREDICTED: regucalcin-like [Nasonia vitripennis]>gi|645023834|ref|XP_008210245.1| PREDICTED: regucalcin-like [Nasonia vitripennis]	1	2	2	8.2	35.194	0.00074659	237730000	13984000
>Cluster-9846.5783;orf1 len=543 frame:3 start:3 end:1631 gi|322790475|gb|EFZ15353.1| hypothetical protein SINV_02533, partial [Solenopsis invicta]	1	7	7	17.5	57.653	2.5025e-46	800580000	34808000
>Cluster-9846.5861;orf1 len=584 frame:3 start:654 end:2405 gi|645021613|ref|XP_001601317.2| PREDICTED: uncharacterized protein LOC100116956 [Nasonia vitripennis];>Cluster-9846.6853;orf1 len=564 frame:2 start:995 end:2686 gi|645021613|ref|XP_001601317.2| PREDICTED: uncharacterized protein LOC100116956 [Nasonia vitripennis]	2	10	10	26.4	65.725	4.2851e-58	552830000	19744000
>Cluster-9846.6032;orf1 len=153 frame:-1 start:1648 end:1190 gi|766934874|ref|XP_011499775.1| PREDICTED: pacifastin-like protease inhibitor cvp4 [Ceratosolen solmsi marchali]	1	2	2	14.5	16.831	2.1563e-08	264390000	33049000
>Cluster-9846.6032;orf2 len=83 frame:-2 start:2643 end:2395 gi|766934874|ref|XP_011499775.1| PREDICTED: pacifastin-like protease inhibitor cvp4 [Ceratosolen solmsi marchali]	1	2	2	42.7	9.1725	4.5525e-71	6838400000	2279500000
>Cluster-9846.6059;orf2 len=380 frame:-3 start:4333 end:3194 gi|345491740|ref|XP_003426698.1| PREDICTED: DNA helicase MCM8 [Nasonia vitripennis]>gi|645020716|ref|XP_008207279.1| PREDICTED: DNA helicase MCM8 [Nasonia vitripennis]	1	6	6	24.5	41.254	8.0469e-26	366090000	24406000
>Cluster-9846.780;orf1 len=213 frame:3 start:3 end:641 gi|795270501|ref|XP_011857247.1| PREDICTED: 40S ribosomal protein S8 isoform X1 [Mandrillus leucophaeus];>Cluster-9846.610;orf1 len=166 frame:1 start:1 end:498 gi|537238288|gb|ERE86265.1| 40S ribosomal protein S8-like protein [Cricetulus griseus]	2	2	1	9.4	24.745	2.4817e-28	0	0
>Cluster-9846.6213; len=2304 start:1155 end:8065; minus strand	1	18	18	10.9	254.17	6.3133e-67	699590000	6083400
>Cluster-9846.6271;orf1 len=127 frame:-1 start:666 end:286 gi|645015177|ref|XP_008206352.1| PREDICTED: putative acyl-CoA-binding protein [Nasonia vitripennis]	1	1	1	11.9	14.612	0.00024466	45531000	4553100
>Cluster-9846.6307;orf1 len=215 frame:3 start:3 end:647 gi|156538815|ref|XP_001608268.1| PREDICTED: protein D3-like [Nasonia vitripennis]>gi|645021476|ref|XP_008207564.1| PREDICTED: protein D3-like [Nasonia vitripennis]	1	4	4	32.2	23.597	9.2257e-31	770080000	85565000
>Cluster-9846.632;orf1 len=139 frame:3 start:72 end:488 gi|156546375|ref|XP_001606832.1| PREDICTED: uncharacterized protein LOC100123223 [Nasonia vitripennis];>Cluster-9846.633;orf1 len=72 frame:3 start:390 end:605 gi|156546375|ref|XP_001606832.1| PREDICTED: uncharacterized protein LOC100123223 [Nasonia vitripennis]	2	3	3	28.3	15.731	1.627e-22	2701600000	540320000
>Cluster-9846.6400;orf1 len=531 frame:-3 start:1926 end:334 gi|766922016|ref|XP_011505553.1| PREDICTED: probable methylmalonate-semialdehyde dehydrogenase [acylating], mitochondrial [Ceratosolen solmsi marchali]	1	10	10	25.7	57.475	1.9828e-58	276420000	12018000
>Cluster-9846.6426;orf1 len=220 frame:1 start:208 end:867 gi|289063438|ref|NP_001165913.1| glutathione S-transferase D1 [Nasonia vitripennis]	1	3	3	18.3	24.923	6.898e-13	554690000	55469000
>Cluster-9846.6562;orf1 len=846 frame:-2 start:2688 end:151 gi|156542973|ref|XP_001602638.1| PREDICTED: WD repeat-containing protein 75 [Nasonia vitripennis]	1	1	1	1.3	95.608	4.0061e-05	138170000	3140200
>Cluster-9846.6614;orf1 len=340 frame:-3 start:2166 end:1147 gi|766940263|ref|XP_011502722.1| PREDICTED: peptidylglycine alpha-hydroxylating monooxygenase isoform X1 [Ceratosolen solmsi marchali]	1	2	2	8.6	38.361	0.00010757	103870000	6924800
>Cluster-9846.6677;orf1 len=622 frame:-3 start:2273 end:408 gi|817200736|ref|XP_012276094.1| PREDICTED: bifunctional purine biosynthesis protein PURH isoform X1 [Orussus abietinus]	1	2	2	5	68.083	0.0010198	62844000	1848400
>Cluster-9846.6855; len=218 start:607 end:1263; minus strand;>Cluster-9846.6854;orf1 len=199 frame:1 start:592 end:1188 gi|156552203|ref|XP_001607410.1| PREDICTED: sarcoplasmic calcium-binding protein 1 [Nasonia vitripennis]>gi|645015400|ref|XP_008206446.1| PREDICTED: sarcoplasmic calcium-binding protein 1 [Nasonia vitripennis]	2	2	2	10.6	24.922	2.159e-19	30990000	2066000
>Cluster-9846.708;orf1 len=522 frame:-1 start:1887 end:322 sp|P08670|VIME_HUMAN Vimentin OS=Homo sapiens GN=VIM PE=1 SV=4;>Cluster-9846.704; len=322 start:1 end:966; minus strand	2	3	3	6.3	59.419	4.2677e-08	102590000	2772700
>Cluster-9846.7132;orf1 len=436 frame:2 start:62 end:1369 gi|817189209|ref|XP_012289204.1| PREDICTED: alpha-tocopherol transfer protein-like isoform X2 [Orussus abietinus];>Cluster-9846.7130;orf1 len=369 frame:3 start:324 end:1430 gi|817189207|ref|XP_012289203.1| PREDICTED: alpha-tocopherol transfer protein-like isoform X1 [Orussus abietinus];>Cluster-9846.7460;orf1 len=359 frame:2 start:62 end:1…	4	2	2	5.5	49.959	0.00013165	13511000	675530
>Cluster-9846.7150;orf1 len=724 frame:2 start:287 end:2458 gi|156554853|ref|XP_001606624.1| PREDICTED: peroxisomal multifunctional enzyme type 2-like [Nasonia vitripennis];>Cluster-9846.3187;orf1 len=190 frame:2 start:293 end:862 gi|156554853|ref|XP_001606624.1| PREDICTED: peroxisomal multifunctional enzyme type 2-like [Nasonia vitripennis]	2	9	9	14.8	79.497	2.4375e-25	553230000	12866000
>Cluster-9846.7182;orf1 len=291 frame:2 start:128 end:1000 gi|288856301|ref|NP_001165802.1| succinate dehydrogenase [ubiquinone] iron-sulfur subunit, mitochondrial [Nasonia vitripennis];>Cluster-9226.0; len=280 start:91 end:929; minus strand;>Cluster-9846.6162;orf1 len=175 frame:3 start:201 end:725 gi|288856301|ref|NP_001165802.1| succinate dehydrogenase [ubiquinone] iron-sulfur subunit, mitochon…	3	3	3	12.8	33.451	2.5943e-06	78686000	4917900
>Cluster-9846.7258;orf1 len=210 frame:-1 start:982 end:353 gi|645010080|ref|XP_008213405.1| PREDICTED: troponin I isoform X13 [Nasonia vitripennis];>Cluster-9846.15229;orf1 len=220 frame:-1 start:1223 end:564 gi|645010050|ref|XP_008213395.1| PREDICTED: troponin I isoform X4 [Nasonia vitripennis];>Cluster-9846.14229;orf1 len=214 frame:-1 start:1205 end:564 gi|645010071|ref|XP_008213402.1| PREDICTE…	3	9	5	29.7	25.081	8.8379e-78	3885400000	555050000
>Cluster-9846.7267; len=201 start:53 end:655; minus strand	1	1	1	8.5	23.445	1.1208e-07	41078000	4564200
>Cluster-9846.9032;orf1 len=799 frame:3 start:3 end:2399 gi|645018230|ref|XP_008205904.1| PREDICTED: dipeptidyl peptidase 3 isoform X1 [Nasonia vitripennis];>Cluster-9846.7273;orf1 len=780 frame:1 start:28 end:2367 gi|645018230|ref|XP_008205904.1| PREDICTED: dipeptidyl peptidase 3 isoform X1 [Nasonia vitripennis]	2	2	2	2.8	90.574	3.0677e-06	17571000	428570
>Cluster-9846.7278;orf1 len=131 frame:-1 start:1518 end:1126 gi|645017418|ref|XP_008205579.1| PREDICTED: transcriptional adapter 2B-like [Nasonia vitripennis]	1	3	3	25.4	14.642	4.0495e-21	276520000	39503000
>Cluster-9846.7309;orf1 len=627 frame:-3 start:2338 end:458 gi|644999955|ref|XP_008215783.1| PREDICTED: LOW QUALITY PROTEIN: trehalase-like [Nasonia vitripennis]	1	23	23	40.4	72.4	1.0589e-158	26868000000	866710000
>Cluster-9846.7311;orf1 len=322 frame:-3 start:1326 end:361 gi|288856315|ref|NP_001165810.1| cytochrome b-c1 complex subunit Rieske, mitochondrial [Nasonia vitripennis]	1	1	1	3.1	34.826	0.0023447	29396000	1837200
>Cluster-9846.7344;orf2 len=476 frame:-3 start:3761 end:2334 gi|645013849|ref|XP_008205289.1| PREDICTED: uncharacterized protein LOC100678720 [Nasonia vitripennis];>Cluster-9846.8964;orf2 len=476 frame:-2 start:3761 end:2334 gi|156550779|ref|XP_001606375.1| PREDICTED: trifunctional enzyme subunit beta, mitochondrial [Nasonia vitripennis]	2	3	3	6.5	51.627	3.5989e-05	44106000	2004800
>Cluster-9846.7398;orf1 len=614 frame:-2 start:3308 end:1467 gi|345487200|ref|XP_001600947.2| PREDICTED: rab proteins geranylgeranyltransferase component A 1 isoform X1 [Nasonia vitripennis]	1	1	1	1.5	68.54	0.0008452	0	0
>Cluster-9846.740;orf1 len=429 frame:3 start:30 end:1316 gi|332853291|ref|XP_003316194.1| PREDICTED: calreticulin [Pan troglodytes];>Cluster-13433.1;orf1 len=424 frame:3 start:36 end:1307 gi|44969651|gb|AAS49610.1| calreticulin, partial [Gallus gallus];>Cluster-3682.0; len=188 start:1 end:566; minus strand;>Cluster-9846.739; len=81 start:1 end:241; minus strand	4	3	3	12.9	49.324	8.047e-20	203960000	9712300
>Cluster-9846.7473;orf1 len=291 frame:-2 start:1422 end:550 gi|229577296|ref|NP_001153344.1| tropomyosin 1 isoform B [Nasonia vitripennis]>gi|229577298|ref|NP_001153345.1| tropomyosin 1 isoform B [Nasonia vitripennis]>gi|746856260|ref|XP_011058813.1| PREDICTED: tropomyosin isoform X11 [Acromyrmex echinatior]>gi|749753273|ref|XP_011139022.1| PREDICTED: tropomyosin isoform X6 [Harpegnathos saltator…	6	13	12	39	33.317	6.3646e-114	17599000000	1035200000
>Cluster-9846.7489;orf1 len=299 frame:-3 start:1521 end:625 gi|288856343|ref|NP_001165822.1| ATP synthase subunit gamma, mitochondrial [Nasonia vitripennis]>gi|645028342|ref|XP_008208355.1| PREDICTED: ATP synthase subunit gamma, mitochondrial isoform X1 [Nasonia vitripennis];>Cluster-9846.7490;orf1 len=299 frame:-2 start:1521 end:625 gi|288856343|ref|NP_001165822.1| ATP synthase subunit gamma, mi…	4	9	9	31.9	32.797	3.7333e-45	1619100000	89948000
>Cluster-9846.7511;orf1 len=99 frame:-2 start:475 end:179 gi|288856326|ref|NP_001165815.1| cytochrome c oxidase subunit 6B1 [Nasonia vitripennis];>Cluster-7628.0; len=135 start:50 end:453; minus strand;>Cluster-18723.0;orf1 len=108 frame:-3 start:464 end:141 gi|733931474|ref|XP_010726370.1| PREDICTED: cytochrome c oxidase subunit 6B1 [Meleagris gallopavo]>gi|733931476|ref|XP_010726371.1| PREDICTE…	4	5	5	50	11.816	2.6175e-22	1206100000	150760000
>Cluster-9846.7564;orf1 len=228 frame:3 start:114 end:797 gi|156546926|ref|XP_001603243.1| PREDICTED: protein D2-like isoform X1 [Nasonia vitripennis];>Cluster-9846.7563;orf1 len=207 frame:3 start:249 end:869 gi|156546926|ref|XP_001603243.1| PREDICTED: protein D2-like isoform X1 [Nasonia vitripennis]	2	4	4	22.5	25.381	4.5363e-37	122440000	11131000
>Cluster-9846.7658;orf1 len=203 frame:2 start:179 end:787 gi|156555680|ref|XP_001601418.1| PREDICTED: ecdysteroid-regulated 16 kDa protein [Nasonia vitripennis]	1	2	2	12.4	22.569	0.00015352	162290000	14753000
>Cluster-9846.7687;orf1 len=160 frame:2 start:1499 end:1978 gi|805808022|ref|XP_012146459.1| PREDICTED: troponin C, isoform 3-like isoform X4 [Megachile rotundata]	1	8	8	45.3	18.221	1.3535e-69	3858800000	482350000
>Cluster-9846.7827;orf1 len=145 frame:-3 start:520 end:86 gi|345478768|ref|XP_003423804.1| PREDICTED: probable salivary secreted peptide [Nasonia vitripennis]	1	6	6	43.1	15.956	2.8417e-38	3241300000	463040000
>Cluster-9846.7837;orf1 len=429 frame:1 start:136 end:1422 gi|238859537|ref|NP_001154975.1| major royal jelly protein-like 7 precursor [Nasonia vitripennis]	1	10	10	28.5	48.206	1.6144e-65	886140000	36923000
>Cluster-9846.7975;orf1 len=142 frame:2 start:1595 end:2020 gi|345480432|ref|XP_001601651.2| PREDICTED: DNA-directed RNA polymerase I subunit RPA49 [Nasonia vitripennis]	1	1	1	11.3	16.215	0.0085187	23917000	2657400
>Cluster-9846.8042;orf1 len=271 frame:-3 start:1823 end:1011 gi|345490227|ref|XP_001604944.2| PREDICTED: dehydrogenase/reductase SDR family member 11-like [Nasonia vitripennis]	1	1	1	3.3	29.964	0.0058111	16977000	1543400
>Cluster-9846.8049;orf1 len=304 frame:2 start:146 end:1057 gi|156546008|ref|XP_001607850.1| PREDICTED: circadian clock-controlled protein-like [Nasonia vitripennis]	1	1	1	4	34.978	0.00038118	31623000	1976500
>Cluster-9846.8143;orf1 len=327 frame:-1 start:1215 end:235 gi|229576961|ref|NP_001153411.1| aldo-keto reductase-like [Nasonia vitripennis]	1	4	4	19.6	37.023	4.753e-08	213240000	10154000
>Cluster-9846.8178;orf1 len=233 frame:2 start:215 end:913 gi|156544942|ref|XP_001607380.1| PREDICTED: superoxide dismutase [Mn], mitochondrial [Nasonia vitripennis]	1	4	4	22	25.873	1.9392e-17	261630000	21802000
>Cluster-9846.8201;orf1 len=693 frame:3 start:3 end:2081 gi|345485608|ref|XP_001607090.2| PREDICTED: filamin-A isoform X2 [Nasonia vitripennis]	1	17	17	36.6	74.89	2.6713e-77	1098100000	26146000
>Cluster-9846.8217;orf1 len=315 frame:3 start:186 end:1130 gi|644995588|ref|XP_008208882.1| PREDICTED: 27 kDa hemolymph protein [Nasonia vitripennis]	1	5	5	15.9	34.206	1.7578e-12	243700000	14335000
>Cluster-9846.8221;orf1 len=230 frame:-3 start:899 end:210 gi|156548610|ref|XP_001607910.1| PREDICTED: peroxiredoxin-6-like [Nasonia vitripennis]	1	5	5	31	25.934	5.3517e-23	163760000	13647000
>Cluster-9846.8273;orf1 len=914 frame:-3 start:4598 end:1857 gi|752879433|ref|XP_011257243.1| PREDICTED: sarcalumenin isoform X2 [Camponotus floridanus]>gi|307179443|gb|EFN67767.1| Sarcalumenin [Camponotus floridanus]	1	4	4	4.4	100.89	2.6559e-12	182210000	5206000
>Cluster-9846.8402;orf1 len=526 frame:1 start:598 end:2175 gi|345480913|ref|XP_001606637.2| PREDICTED: TOM1-like protein 2 [Nasonia vitripennis]>gi|645010915|ref|XP_008213629.1| PREDICTED: TOM1-like protein 2 [Nasonia vitripennis]>gi|645010918|ref|XP_008213630.1| PREDICTED: TOM1-like protein 2 [Nasonia vitripennis];>Cluster-9846.8403;orf1 len=310 frame:1 start:598 end:1527 gi|345480913|ref|XP_001…	2	1	1	2.5	56.301	0.0004547	11278000	469900
>Cluster-9846.8491;orf1 len=658 frame:-2 start:2742 end:769 gi|156547889|ref|XP_001608044.1| PREDICTED: heat shock 70 kDa protein cognate 4-like [Nasonia vitripennis]>gi|645034761|ref|XP_008201972.1| PREDICTED: heat shock 70 kDa protein cognate 4-like [Nasonia vitripennis]	1	11	2	21.6	72.065	1.3635e-58	69467000	2043200
>Cluster-9846.851;orf1 len=266 frame:3 start:129 end:926 gi|426352465|ref|XP_004043733.1| PREDICTED: chloride intracellular channel protein 1 isoform 2 [Gorilla gorilla gorilla];>Cluster-7884.0;orf1 len=194 frame:1 start:238 end:819 gi|302566277|pdb|3O3T|A Chain A, Crystal Structure Analysis Of M32a Mutant Of Human Clic1;>Cluster-7884.0;orf2 len=142 frame:3 start:129 end:554 gi|302566277|pdb|3O3T…	4	4	4	23.4	29.358	2.2019e-17	145830000	9114500
>Cluster-9846.8647;orf1 len=231 frame:2 start:44 end:736 gi|288856254|ref|NP_001165782.1| NADH dehydrogenase [ubiquinone] iron-sulfur protein 4, mitochondrial [Nasonia vitripennis]	1	8	8	50	26.163	3.6924e-40	312150000	26012000
>Cluster-9846.877;orf1 len=390 frame:2 start:5 end:1174 gi|829984007|ref|XP_012583128.1| PREDICTED: heterogeneous nuclear ribonucleoprotein A3 isoform X3 [Condylura cristata];>Cluster-9846.879;orf1 len=390 frame:2 start:5 end:1174 gi|817313455|ref|XP_012327348.1| PREDICTED: heterogeneous nuclear ribonucleoprotein A3 isoform X2 [Aotus nancymaae]>gi|817313457|ref|XP_012327349.1| PREDICTED: heteroge…	3	1	1	2.8	40.736	0.0086819	17933000	943850
>Cluster-9846.8795;orf2 len=271 frame:3 start:60 end:872 gi|645001208|ref|XP_008209424.1| PREDICTED: methionine aminopeptidase 1D, mitochondrial isoform X1 [Nasonia vitripennis]>gi|645001210|ref|XP_008209426.1| PREDICTED: methionine aminopeptidase 1D, mitochondrial isoform X1 [Nasonia vitripennis]	1	2	2	13.3	30.25	3.2016e-05	14067000	1172200
>Cluster-9846.8855;orf1 len=459 frame:2 start:1376 end:2752 gi|766932609|ref|XP_011498533.1| PREDICTED: obg-like ATPase 1 [Ceratosolen solmsi marchali]	1	1	1	3.3	51.941	2.1251e-05	14548000	501670
>Cluster-9846.8873;orf1 len=555 frame:-2 start:2115 end:451 gi|300116732|ref|NP_001177859.1| T-complex protein 1 subunit gamma [Nasonia vitripennis]	1	1	1	2	60.949	0.0014164	11925000	350740
>Cluster-9846.8916;orf1 len=214 frame:-1 start:1499 end:858 gi|156541240|ref|XP_001600736.1| PREDICTED: proteasome subunit beta type-2-like [Nasonia vitripennis]>gi|645038115|ref|XP_008217498.1| PREDICTED: proteasome subunit beta type-2-like [Nasonia vitripennis]	1	1	1	4.2	24.126	0.0010812	23685000	2153200
>Cluster-9846.8920;orf1 len=575 frame:1 start:403 end:2127 gi|283135248|ref|NP_001164377.1| glucose-6-phosphate isomerase [Nasonia vitripennis];>Cluster-9846.1053;orf1 len=581 frame:2 start:2 end:1744 gi|6653226|gb|AAF22645.1|AF187554_1 sperm antigen-36 [Homo sapiens];CON__Q3ZBD7	3	12	12	30.1	64.111	4.0156e-174	823810000	23537000
>Cluster-9846.8978;orf1 len=113 frame:-3 start:850 end:512 gi|817184463|ref|XP_012281767.1| PREDICTED: cytochrome c-2 [Orussus abietinus]>gi|817184465|ref|XP_012281775.1| PREDICTED: cytochrome c-2 [Orussus abietinus]	1	5	5	37.5	12.284	1.4825e-16	932110000	133160000
>Cluster-9846.8982;orf1 len=493 frame:3 start:3 end:1481 gi|345485473|ref|XP_001606111.2| PREDICTED: ovalbumin-related protein X isoform X12 [Nasonia vitripennis]>gi|645034272|ref|XP_008201841.1| PREDICTED: ovalbumin-related protein X isoform X12 [Nasonia vitripennis]	1	16	3	41.3	54.661	1.3855e-250	40316000000	1679800000
>Cluster-9846.9013;orf1 len=443 frame:2 start:434 end:1762 gi|345486851|ref|XP_003425569.1| PREDICTED: protein yellow [Nasonia vitripennis]	1	2	2	6.8	49.297	1.8658e-05	14109000	671840
>Cluster-9846.9071;orf1 len=687 frame:1 start:46 end:2106 gi|156551261|ref|XP_001600744.1| PREDICTED: sphingomyelin phosphodiesterase-like [Nasonia vitripennis]>gi|645007137|ref|XP_008216138.1| PREDICTED: sphingomyelin phosphodiesterase-like [Nasonia vitripennis]>gi|645007140|ref|XP_008216139.1| PREDICTED: sphingomyelin phosphodiesterase-like [Nasonia vitripennis]	1	16	16	29.2	77.978	4.7829e-76	2017000000	53078000
>Cluster-9846.9135;orf1 len=149 frame:3 start:3 end:449 gi|156545926|ref|XP_001600607.1| PREDICTED: uncharacterized protein LOC100113557 [Nasonia vitripennis]>gi|355389891|emb|CCD17778.1| putative odorant binding protein 9 [Nasonia vitripennis]	1	1	1	6.8	16.536	0.0040655	0	0
>Cluster-9846.9139;orf1 len=441 frame:-1 start:2084 end:762 gi|766921830|ref|XP_011505450.1| PREDICTED: glutamine synthetase 2 cytoplasmic-like [Ceratosolen solmsi marchali]	1	6	1	17	48.826	8.1088e-12	27747000	1261200
>Cluster-9846.9196;orf1 len=149 frame:2 start:2 end:448 gi|645028683|ref|XP_001601497.2| PREDICTED: uncharacterized protein LOC100113667 [Nasonia vitripennis]	1	1	1	7.4	17.059	0.00055044	0	0
>Cluster-9846.9199;orf1 len=479 frame:2 start:155 end:1591 gi|645028980|ref|XP_008205620.1| PREDICTED: flavin-containing monooxygenase FMO GS-OX-like 2 [Nasonia vitripennis]	1	5	5	16.5	54.313	6.1694e-27	205200000	9327200
>Cluster-9846.9289;orf1 len=859 frame:1 start:1 end:2577 gi|644997257|ref|XP_008212277.1| PREDICTED: titin isoform X1 [Nasonia vitripennis]	1	4	3	5.8	99.528	1.2759e-10	176580000	5193500
>Cluster-9846.930;orf1 len=411 frame:2 start:2 end:1234 gi|644993458|ref|XP_008213175.1| PREDICTED: filaggrin-like [Nasonia vitripennis]	1	11	11	55.6	42.588	0	18791000000	1445400000
>Cluster-9846.9305;orf1 len=596 frame:-2 start:1942 end:155 gi|817211481|ref|XP_012281879.1| PREDICTED: catalase [Orussus abietinus]	1	8	8	18.5	67.422	7.9042e-39	591980000	16444000
>Cluster-9846.9306;orf1 len=226 frame:1 start:31 end:708 gi|156548632|ref|XP_001608225.1| PREDICTED: glutathione S-transferase [Nasonia vitripennis]>gi|644993097|ref|XP_008203102.1| PREDICTED: glutathione S-transferase [Nasonia vitripennis]>gi|644993100|ref|XP_008203103.1| PREDICTED: glutathione S-transferase [Nasonia vitripennis]>gi|644993104|ref|XP_008203104.1| PREDICTED: glutathione S-transfer…	2	2	2	8.9	25.338	0.0017604	15139000	1009300
>Cluster-9846.9321;orf1 len=404 frame:2 start:17 end:1228 gi|345487725|ref|XP_003425745.1| PREDICTED: DNA ligase 1-like [Nasonia vitripennis]	1	2	2	6.9	45.095	0.00017998	79870000	4437200
>Cluster-9846.9371;orf1 len=617 frame:2 start:173 end:2023 gi|766917366|ref|XP_011505401.1| PREDICTED: V-type proton ATPase catalytic subunit A [Ceratosolen solmsi marchali]>gi|766917368|ref|XP_011505410.1| PREDICTED: V-type proton ATPase catalytic subunit A [Ceratosolen solmsi marchali]>gi|766917370|ref|XP_011505418.1| PREDICTED: V-type proton ATPase catalytic subunit A [Ceratosolen solmsi march…	3	17	17	36.4	68.351	7.9795e-70	1084600000	30988000
>Cluster-9846.9374;orf1 len=166 frame:1 start:58 end:555 gi|665791424|ref|XP_008543266.1| PREDICTED: 40S ribosomal protein S19-like [Microplitis demolitor]	1	1	1	5.5	18.559	0.0065544	26164000	2616400
>Cluster-9846.9424;orf1 len=121 frame:-2 start:683 end:321 gi|156549559|ref|XP_001606355.1| PREDICTED: uncharacterized protein LOC100118686 [Nasonia vitripennis]>gi|355390005|emb|CCD17835.1| putative odorant binding protein 66 [Nasonia vitripennis]	1	1	1	11.7	13.181	8.1467e-05	63896000	7986900
>Cluster-9846.9433; len=260 start:1 end:778; minus strand	1	13	12	42.7	29.452	1.2888e-107	18638000000	1242500000
>Cluster-9846.9498;orf1 len=185 frame:3 start:3 end:557 gi|156551682|ref|XP_001601652.1| PREDICTED: uncharacterized protein LOC100117399 [Nasonia vitripennis]	1	1	1	6	21.461	0.0016027	33016000	2539700
>Cluster-9846.9529;orf1 len=411 frame:-3 start:4720 end:3488 gi|156542873|ref|XP_001600632.1| PREDICTED: spermine synthase [Nasonia vitripennis]	1	1	1	3.4	46.039	1.5619e-06	11932000	497160
>Cluster-9846.9538;orf1 len=274 frame:-1 start:1257 end:436 gi|156546214|ref|XP_001604558.1| PREDICTED: uncharacterized protein LOC100120966 [Nasonia vitripennis]>gi|355389965|emb|CCD17815.1| putative odorant binding protein 46 [Nasonia vitripennis]	1	6	6	27.5	30.709	6.9305e-17	252890000	13310000
>Cluster-9846.957;orf1 len=586 frame:-2 start:2055 end:298 gi|239735550|ref|NP_001155148.1| carboxylesterase clade B, member 2 precursor [Nasonia vitripennis];>Cluster-9846.956;orf1 len=311 frame:-2 start:2137 end:1205 gi|239735550|ref|NP_001155148.1| carboxylesterase clade B, member 2 precursor [Nasonia vitripennis];>Cluster-9846.17498;orf1 len=605 frame:3 start:2181 end:3995 gi|645024044|ref|XP…	3	21	21	48.4	65.525	3.953e-117	7211000000	232610000
>Cluster-9846.9616;orf1 len=614 frame:-2 start:3140 end:1299 gi|766939770|ref|XP_011502453.1| PREDICTED: 60 kDa heat shock protein, mitochondrial [Ceratosolen solmsi marchali]	1	10	9	24.5	65.435	1.6814e-52	733080000	22909000
>Cluster-9846.9620;orf1 len=160 frame:-1 start:482 end:3 gi|289629210|ref|NP_001166187.1| Z band alternatively spliced PDZ-motif protein 66 isoform 1 [Nasonia vitripennis]	1	1	1	9.4	18.201	1.5186e-17	77345000	7734500
>Cluster-9846.9637;orf1 len=263 frame:3 start:3 end:791 gi|766920745|ref|XP_011504859.1| PREDICTED: V-type proton ATPase subunit D [Ceratosolen solmsi marchali]	1	1	1	6.1	29.506	1.9859e-08	21925000	1566100
>Cluster-9846.9642;orf1 len=527 frame:3 start:129 end:1709 gi|645007734|ref|XP_008216391.1| PREDICTED: multiple inositol polyphosphate phosphatase 1-like [Nasonia vitripennis]	1	3	3	6.1	60.305	2.2359e-15	25635000	854490
>Cluster-9846.9700;orf1 len=368 frame:-2 start:2967 end:1864 gi|345496040|ref|XP_001605332.2| PREDICTED: trypsin-3 [Nasonia vitripennis]	1	11	11	51	38.547	8.9942e-91	1472100000	98139000
>Cluster-9846.9713;orf1 len=332 frame:-2 start:1307 end:312 gi|766921596|ref|XP_011505326.1| PREDICTED: annexin B9-like [Ceratosolen solmsi marchali]	1	8	8	34.1	36.599	5.0652e-54	847780000	47099000
>Cluster-9846.9741;orf1 len=256 frame:1 start:109 end:876 gi|759062643|ref|XP_011340675.1| PREDICTED: 60S ribosomal protein L23a [Cerapachys biroi]>gi|607358583|gb|EZA52971.1| 60S ribosomal protein L23a [Cerapachys biroi]	1	2	2	7.1	27.691	0.000544	65453000	5950200
>Cluster-9846.9762;orf1 len=140 frame:-2 start:1192 end:773 gi|571576852|ref|XP_006571871.1| PREDICTED: crustacean hyperglycemic hormones isoform X2 [Apis mellifera]>gi|571576854|ref|XP_006571872.1| PREDICTED: crustacean hyperglycemic hormones isoform X3 [Apis mellifera]>gi|571576856|ref|XP_006571873.1| PREDICTED: crustacean hyperglycemic hormones isoform X4 [Apis mellifera]	1	7	7	47.5	15.496	1.2383e-23	1648000000	274660000
>Cluster-9846.9776; len=125 start:65 end:439; minus strand;>Cluster-9846.7353; len=130 start:110 end:499; minus strand;>Cluster-17030.0;orf1 len=128 frame:-1 start:407 end:24 sp|P83863|H2B_LITVA Histone H2B (Fragments) OS=Litopenaeus vannamei PE=1 SV=2;>Cluster-22473.0;orf1 len=128 frame:-1 start:407 end:24 gi|170059748|ref|XP_001865496.1| late histone H2B.L4 [Culex quinquefasciatus]>gi|167878385…	4	4	2	34.7	13.69	3.361e-28	2348800000	335550000
>Cluster-9846.9803;orf1 len=262 frame:1 start:268 end:1053 gi|156545000|ref|XP_001608114.1| PREDICTED: NECAP-like protein CG9132 [Nasonia vitripennis]>gi|645037156|ref|XP_008217186.1| PREDICTED: NECAP-like protein CG9132 [Nasonia vitripennis]	1	1	1	4.2	28.952	0.0088667	6356300	488940
>Cluster-9846.9835;orf1 len=152 frame:2 start:269 end:724 gi|156542799|ref|XP_001607402.1| PREDICTED: profilin [Nasonia vitripennis]	1	3	3	29.1	16.585	9.9768e-09	251890000	27987000
>Cluster-9846.9845;orf1 len=325 frame:1 start:721 end:1695 gi|345482565|ref|XP_001608198.2| PREDICTED: neural/ectodermal development factor IMP-L2 [Nasonia vitripennis];>Cluster-9846.9844;orf1 len=309 frame:1 start:721 end:1647 gi|345482565|ref|XP_001608198.2| PREDICTED: neural/ectodermal development factor IMP-L2 [Nasonia vitripennis]	2	16	16	67.9	35.751	0	81649000000	4802900000
>Cluster-9846.9849;orf1 len=344 frame:2 start:17 end:1048 gi|229576957|ref|NP_001153410.1| aldo-keto reductase-like [Nasonia vitripennis]	1	3	3	9.9	39.332	9.6418e-10	100460000	4784000
>Cluster-9846.9907;orf1 len=1167 frame:1 start:1 end:3501 gi|645001103|ref|XP_001600694.3| PREDICTED: histone-lysine N-methyltransferase NSD2 isoform X1 [Nasonia vitripennis]>gi|645001105|ref|XP_008209381.1| PREDICTED: histone-lysine N-methyltransferase NSD2 isoform X1 [Nasonia vitripennis]>gi|645001107|ref|XP_008209382.1| PREDICTED: histone-lysine N-methyltransferase NSD2 isoform X1 [Nasonia vit…	2	3	3	4.5	131.79	2.1921e-41	139960000	2413100
>Cluster-9846.9910;orf2 len=214 frame:1 start:1804 end:2445 gi|156543362|ref|XP_001608132.1| PREDICTED: probable phospholipid hydroperoxide glutathione peroxidase [Nasonia vitripennis]	1	7	7	43.2	24.112	7.5056e-86	1200300000	109120000
>Cluster-9846.9928;orf1 len=415 frame:-3 start:2189 end:945 gi|156554092|ref|XP_001600501.1| PREDICTED: isocitrate dehydrogenase [NAD] subunit gamma, mitochondrial-like [Nasonia vitripennis]>gi|644996799|ref|XP_008208172.1| PREDICTED: isocitrate dehydrogenase [NAD] subunit gamma, mitochondrial-like [Nasonia vitripennis]>gi|644996801|ref|XP_008208173.1| PREDICTED: isocitrate dehydrogenase [NAD] su…	1	4	4	15.2	45.436	3.2264e-58	186010000	10334000
>Cluster-9846.9955;orf1 len=613 frame:-2 start:5737 end:3899 gi|645012496|ref|XP_008207833.1| PREDICTED: serine/threonine-protein kinase PAK 1 [Nasonia vitripennis]>gi|645012498|ref|XP_008207834.1| PREDICTED: serine/threonine-protein kinase PAK 1 [Nasonia vitripennis]>gi|645012500|ref|XP_008207835.1| PREDICTED: serine/threonine-protein kinase PAK 1 [Nasonia vitripennis]>gi|645012502|ref|XP_008207…	1	9	9	24	65.554	7.1816e-72	310230000	10698000
>Cluster-9846.9958;orf1 len=727 frame:-2 start:2593 end:413 gi|766942089|ref|XP_011503696.1| PREDICTED: epidermal growth factor receptor substrate 15-like 1 [Ceratosolen solmsi marchali]	1	1	1	2.2	81.392	0.0092803	11895000	290110
>Cluster-9846.9978;orf1 len=1901 frame:3 start:339 end:6041 gi|645003796|ref|XP_008212703.1| PREDICTED: myosin heavy chain, muscle isoform X7 [Nasonia vitripennis];>Cluster-9846.13343;orf1 len=1899 frame:3 start:339 end:6035 gi|766923529|ref|XP_011506392.1| PREDICTED: myosin heavy chain, muscle isoform X20 [Ceratosolen solmsi marchali];>Cluster-9846.13032;orf1 len=1188 frame:3 start:3411 end:6974…	5	33	33	21.2	217.59	0	1307200000	12216000
>Cluster-9846.9996;orf1 len=205 frame:2 start:137 end:751 gi|289177014|ref|NP_001165924.1| glutathione S-transferase S8 [Nasonia vitripennis]>gi|645012267|ref|XP_008207736.1| PREDICTED: glutathione S-transferase S8 isoform X1 [Nasonia vitripennis]	1	3	3	20.6	23.279	2.6405e-28	43928000	3660600
>Cluster-996.0;orf1 len=302 frame:1 start:1 end:906 gi|189067253|dbj|BAG36963.1| unnamed protein product [Homo sapiens]	1	1	1	4	33.004	0.00068425	17516000	1030400
>Cluster-8535.29370;orf1 len=172 frame:3 start:168 end:683 gi|544431389|ref|XP_005554553.1| PREDICTED: 40S ribosomal protein S18-like [Macaca fascicularis];>Cluster-8535.14446;orf1 len=168 frame:1 start:1 end:504 gi|808139819|ref|XP_003400826.2| PREDICTED: LOW QUALITY PROTEIN: 40S ribosomal protein S18 [Bombus terrestris];>Cluster-14260.0;orf1 len=166 frame:3 start:57 end:554 gi|67083901|gb|AAY66…	13	1	1	4.7	19.68	0.0037715	35325000	3925000
>Cluster-10078.0;orf1 len=233 frame:-1 start:815 end:117 gi|397475051|ref|XP_003846056.1| PREDICTED: LOW QUALITY PROTEIN: heat shock protein beta-1 [Pan paniscus];>Cluster-9168.0; len=123 start:1 end:369; minus strand;>Cluster-5028.0;orf1 len=115 frame:-3 start:461 end:117 gi|545687155|ref|NP_001270814.1| uncharacterized protein LOC101865323 [Macaca fascicularis]>gi|90082004|dbj|BAE90283.1| unnam…	3	4	4	22.8	25.704	2.3274e-09	228370000	14273000
>Cluster-10173.3;orf1 len=156 frame:2 start:2 end:469 gi|733916828|ref|XP_010720496.1| PREDICTED: 60S ribosomal protein L23a [Meleagris gallopavo];>Cluster-19398.0;orf1 len=155 frame:3 start:3 end:467 gi|700347998|ref|XP_009918056.1| PREDICTED: 60S ribosomal protein L23a, partial [Haliaeetus albicilla]	2	1	1	8.4	17.564	0.0092843	8628300	1438000
>Cluster-1023.0;orf1 len=484 frame:3 start:36 end:1487 gi|400261202|pdb|4AW6|A Chain A, Crystal Structure Of The Human Nuclear Membrane Zinc Metalloprotease Zmpste24 (face1)>gi|400261203|pdb|4AW6|B Chain B, Crystal Structure Of The Human Nuclear Membrane Zinc Metalloprotease Zmpste24 (face1)>gi|400261204|pdb|4AW6|D Chain D, Crystal Structure Of The Human Nuclear Membrane Zinc Metalloprotease Zmps…	1	2	2	5	55.808	1.5053e-05	12877000	677710
>Cluster-8535.577;orf1 len=321 frame:2 start:2 end:964 gi|45829841|gb|AAH68199.1| SLC25A5 protein, partial [Homo sapiens];>Cluster-24486.0;orf1 len=310 frame:3 start:3 end:932 gi|527266605|ref|XP_005151465.1| PREDICTED: ADP/ATP translocase 3 [Melopsittacus undulatus]>gi|543339513|ref|XP_005516555.1| PREDICTED: ADP/ATP translocase 3 [Pseudopodoces humilis]>gi|197127557|gb|ACH44055.1| putative solu…	11	2	2	6.2	35.052	3.1694e-05	21790000	1089500
>Cluster-8535.15347;orf1 len=221 frame:1 start:1 end:663 gi|817184810|ref|XP_012283483.1| PREDICTED: 60S ribosomal protein L11 isoform X1 [Orussus abietinus];>Cluster-10864.0; len=115 start:1 end:342; minus strand	2	1	1	6.4	24.806	0.00081863	34499000	3833200
>Cluster-1089.0;orf1 len=150 frame:-3 start:499 end:50 gi|4504981|ref|NP_002296.1| galectin-1 [Homo sapiens]>gi|114686337|ref|XP_001162104.1| PREDICTED: galectin-1 [Pan troglodytes]>gi|397501910|ref|XP_003821617.1| PREDICTED: galectin-1 [Pan paniscus]>gi|126155|sp|P09382.2|LEG1_HUMAN RecName: Full=Galectin-1; Short=Gal-1; AltName: Full=14 kDa laminin-binding protein; Short=HLBP14; AltName: Full=1…	2	3	3	18.8	16.248	3.5593e-28	186250000	20695000
>Cluster-20315.0;orf1 len=385 frame:-3 start:1478 end:324 gi|294945368|ref|XP_002784645.1| fructose-1,6-bisphosphate aldolase, putative [Perkinsus marinus ATCC 50983]>gi|239897830|gb|EER16441.1| fructose-1,6-bisphosphate aldolase, putative [Perkinsus marinus ATCC 50983];>Cluster-8535.26999;orf1 len=368 frame:-1 start:1362 end:259 gi|294945368|ref|XP_002784645.1| fructose-1,6-bisphosphate aldolase…	5	1	1	3.6	41.582	6.0124e-06	50817000	2117400
>Cluster-16881.0;orf1 len=150 frame:2 start:20 end:469 gi|676423444|gb|KFO64775.1| 40S ribosomal protein S16, partial [Corvus brachyrhynchos];>Cluster-8535.914; len=147 start:66 end:506; minus strand;>Cluster-11278.0; len=146 start:30 end:466; minus strand;>Cluster-8535.30391; len=69 start:1 end:206; minus strand	4	1	1	6.7	16.64	0.006157	11055000	921230
>Cluster-11445.0;orf1 len=339 frame:-3 start:1344 end:328 gi|815815757|ref|XP_012228948.1| PREDICTED: glyceraldehyde-3-phosphate dehydrogenase 1 [Linepithema humile]	1	3	2	13.3	36.293	6.3352e-11	205960000	11442000
>Cluster-12124.2;orf1 len=375 frame:-1 start:1674 end:550 gi|55956921|ref|NP_004490.2| heterogeneous nuclear ribonucleoprotein A/B isoform b [Homo sapiens]>gi|426351246|ref|XP_004043166.1| PREDICTED: heterogeneous nuclear ribonucleoprotein A/B isoform 2 [Gorilla gorilla gorilla]>gi|12803583|gb|AAH02625.1| Heterogeneous nuclear ribonucleoprotein A/B [Homo sapiens]>gi|13528732|gb|AAH04561.1| Hetero…	2	1	1	3.7	40.168	0.00088029	19195000	1476500
>Cluster-8535.5007; len=209 start:65 end:691; minus strand;>Cluster-13748.0;orf1 len=204 frame:2 start:47 end:658 gi|225346693|gb|ACN86369.1| troponin I transcript variant B [Bombyx mandarina];>Cluster-12441.0; len=203 start:50 end:658; minus strand	3	3	1	14.4	24.69	1.9315e-38	64589000	9227000
>Cluster-12739.1; len=152 start:1 end:455; minus strand	1	2	2	28.9	17.5	0.0066761	0	0
>Cluster-12774.0; len=170 start:64 end:573; minus strand	1	2	1	11.2	18.923	0.000319	94880000	10542000
>Cluster-12821.1;orf1 len=212 frame:3 start:3 end:638 sp|Q9LJ64|PLRX1_ARATH Pollen-specific leucine-rich repeat extensin-like protein 1 OS=Arabidopsis thaliana GN=PEX1 PE=2 SV=1	1	1	1	6.6	21.682	0.011893	28558000	4759600
>Cluster-12984.0; len=317 start:1 end:950; minus strand;>Cluster-16037.1;orf1 len=151 frame:2 start:2 end:454 gi|156708130|gb|ABU93323.1| tubulin alpha subunit [Monocercomonoides sp. PA]	2	1	1	4.1	34.996	0.00031293	70080000	4380000
>Cluster-13456.0; len=45 start:162 end:296; minus strand	1	1	1	22.2	5.0566	1.3394e-05	227370000	75791000
>Cluster-8535.11627; len=201 start:151 end:753; minus strand;>Cluster-13464.0;orf1 len=179 frame:2 start:2 end:538 gi|90820030|gb|ABD98772.1| putative ribosomal protein L19e [Graphocephala atropunctata]	2	1	1	8.5	23.445	1.6206e-08	41078000	4564200
>Cluster-13669.0;orf1 len=482 frame:-2 start:1801 end:356 gi|221103824|ref|XP_002160955.1| PREDICTED: V-type proton ATPase subunit B [Hydra vulgaris];>Cluster-9397.0;orf1 len=290 frame:-1 start:872 end:3 gi|675390116|gb|KFM83013.1| V-type proton ATPase subunit B, partial [Stegodyphus mimosarum]	2	2	1	7.1	53.357	1.3784e-25	314640000	12586000
>Cluster-8535.17072;orf1 len=149 frame:2 start:104 end:550 gi|66558956|ref|XP_392812.2| PREDICTED: 60S ribosomal protein L23 [Apis mellifera]>gi|156545547|ref|XP_001605069.1| PREDICTED: 60S ribosomal protein L23 [Nasonia vitripennis]>gi|380028209|ref|XP_003697800.1| PREDICTED: 60S ribosomal protein L23 [Apis florea]>gi|383854692|ref|XP_003702854.1| PREDICTED: 60S ribosomal protein L23 [Megachile …	4	3	3	29.1	15.712	2.7706e-10	208920000	23214000
>Cluster-13888.0;orf1 len=280 frame:-2 start:840 end:1 gi|646697936|gb|KDR09351.1| 60S ribosomal protein L23a [Zootermopsis nevadensis]	1	1	1	3.6	28.772	0.011004	31685000	3960700
>Cluster-1393.0;orf1 len=302 frame:1 start:1 end:906 gi|189067253|dbj|BAG36963.1| unnamed protein product [Homo sapiens]	1	1	1	4	33.004	0.00058324	17516000	1030400
>Cluster-14138.1; len=281 start:1 end:840; minus strand	1	2	2	10.4	30.907	1.1707e-08	0	0
>Cluster-22930.0; len=400 start:1 end:1197; minus strand;>Cluster-8535.22639;orf1 len=223 frame:2 start:563 end:1231 gi|746865663|ref|XP_011063864.1| PREDICTED: ras-related protein Rab-39B [Acromyrmex echinatior]>gi|751231359|ref|XP_011169234.1| PREDICTED: ras-related protein Rab-39B [Solenopsis invicta]>gi|751231361|ref|XP_011169235.1| PREDICTED: ras-related protein Rab-39B [Solenopsis invicta]>…	5	1	1	2.8	42.771	8.2857e-07	56754000	3338500
>Cluster-8535.1082; len=266 start:1 end:799; minus strand;>Cluster-8535.15787;orf1 len=246 frame:-3 start:801 end:64 gi|156553282|ref|XP_001599651.1| PREDICTED: 40S ribosomal protein S3 [Nasonia vitripennis];>Cluster-8535.6161;orf1 len=243 frame:3 start:3 end:731 gi|646711760|gb|KDR16813.1| 40S ribosomal protein S3 [Zootermopsis nevadensis];>Cluster-18274.0; len=228 start:64 end:745; minus strand…	10	2	2	7.9	29.142	1.0652e-09	25345000	1267300
>Cluster-1489.0;orf1 len=314 frame:-2 start:944 end:3 gi|426350908|ref|XP_004043005.1| PREDICTED: methionine adenosyltransferase 2 subunit beta isoform 1 [Gorilla gorilla gorilla]	1	1	1	3.8	34.687	0.0001559	818150000	43061000
>Cluster-149.0;orf1 len=453 frame:3 start:3 end:1361 gi|817325234|ref|XP_012289516.1| PREDICTED: nucleolin [Aotus nancymaae]	1	2	2	4.6	49.299	0.0027846	15686000	580950
>Cluster-1490.0;orf1 len=446 frame:-3 start:2237 end:900 gi|5031573|ref|NP_005712.1| actin-related protein 3 isoform 1 [Homo sapiens]>gi|27806335|ref|NP_776651.1| actin-related protein 3 [Bos taurus]>gi|197101811|ref|NP_001126071.1| actin-related protein 3 [Pongo abelii]>gi|114580542|ref|XP_001154210.1| PREDICTED: actin-related protein 3 isoform X1 [Pan troglodytes]>gi|291391454|ref|XP_002712451.…	4	1	1	4.7	50.537	0.0032455	0	0
>Cluster-8535.17920;orf1 len=166 frame:-3 start:549 end:52 gi|665791424|ref|XP_008543266.1| PREDICTED: 40S ribosomal protein S19-like [Microplitis demolitor];>Cluster-15086.0;orf1 len=95 frame:-1 start:286 end:2 gi|501292839|dbj|BAN20526.1| ribosomal protein S19a [Riptortus pedestris]	2	1	1	5.5	18.559	0.0072875	26164000	2616400
>Cluster-15651.0;orf1 len=217 frame:1 start:7 end:657 gi|645041872|ref|XP_008204064.1| PREDICTED: trichohyalin-like [Nasonia vitripennis]	1	1	1	6.9	25.872	0.010854	0	0
>Cluster-8535.692;orf1 len=190 frame:3 start:3 end:572 gi|62088522|dbj|BAD92708.1| ribosomal protein L12 variant [Homo sapiens];>Cluster-15898.0;orf1 len=177 frame:2 start:20 end:550 gi|478486799|ref|NP_001264608.1| 60S ribosomal protein L12 [Gallus gallus]>gi|326930180|ref|XP_003211229.1| PREDICTED: 60S ribosomal protein L12 [Meleagris gallopavo]	2	1	1	8.5	20.636	0.0055669	13869000	1386900
>Cluster-16024.0;orf1 len=467 frame:-2 start:1545 end:145 gi|640818029|ref|XP_008065870.1| PREDICTED: spliceosome RNA helicase DDX39B [Tarsius syrichta];>Cluster-7707.0;orf1 len=290 frame:-2 start:872 end:3 gi|640818029|ref|XP_008065870.1| PREDICTED: spliceosome RNA helicase DDX39B [Tarsius syrichta];>Cluster-3295.0; len=134 start:1 end:402; minus strand	3	1	1	2.1	53.243	0.0055983	25871000	1293600
>Cluster-1648.2;orf1 len=345 frame:-1 start:1502 end:468 gi|795233918|ref|XP_011852165.1| PREDICTED: annexin A5 [Mandrillus leucophaeus];>Cluster-1648.3;orf1 len=324 frame:-3 start:1439 end:468 gi|795233918|ref|XP_011852165.1| PREDICTED: annexin A5 [Mandrillus leucophaeus]	2	1	1	2.6	38.546	0.0026022	7122600	309680
>Cluster-5039.0;orf2 len=216 frame:3 start:171 end:818 gi|731456449|ref|XP_003405805.2| PREDICTED: ADP-ribosylation factor 3 isoform X1 [Loxodonta africana];>Cluster-8535.1099;orf1 len=208 frame:2 start:2 end:625 gi|694892090|ref|XP_009439877.1| PREDICTED: ADP-ribosylation factor 1 isoform X1 [Pan troglodytes];>Cluster-5039.1;orf1 len=203 frame:2 start:2 end:610 gi|820986014|ref|XP_012361987.1| P…	24	3	2	16.7	24.39	1.8054e-11	24513000	2042800
>Cluster-1719.0;orf1 len=498 frame:1 start:1 end:1494 gi|795124411|ref|XP_011833044.1| PREDICTED: adenylyl cyclase-associated protein 1 isoform X1 [Mandrillus leucophaeus];>Cluster-15604.0; len=129 start:192 end:577; minus strand	2	16	16	43.7	54.07	8.6718e-231	3594200000	123940000
>Cluster-17306.0;orf1 len=458 frame:2 start:164 end:1537 gi|524900386|ref|XP_005106613.1| PREDICTED: eukaryotic peptide chain release factor subunit 1 [Aplysia californica];>Cluster-17306.1;orf1 len=458 frame:2 start:164 end:1537 gi|524900386|ref|XP_005106613.1| PREDICTED: eukaryotic peptide chain release factor subunit 1 [Aplysia californica];>Cluster-2811.0;orf1 len=425 frame:2 start:2 end:1276…	3	1	1	2.2	51.306	0.0084368	12241000	489640
>Cluster-17381.0;orf2 len=201 frame:-2 start:820 end:218 gi|289177102|ref|NP_001165964.1| carboxylesterase clade D, member 5 precursor [Nasonia vitripennis];>Cluster-17381.2;orf1 len=201 frame:-1 start:820 end:218 gi|289177102|ref|NP_001165964.1| carboxylesterase clade D, member 5 precursor [Nasonia vitripennis];>Cluster-8535.3220;orf1 len=558 frame:3 start:267 end:1940 gi|156546659|ref|XP_001603…	5	2	1	9	23.742	7.2933e-07	293230000	26657000
>Cluster-1745.1;orf1 len=476 frame:2 start:2 end:1429 gi|544186036|ref|NP_001269635.1| protein disulfide-isomerase A6 isoform c [Homo sapiens]	1	3	3	9.7	51.497	8.4583e-12	69954000	3681800
>Cluster-1746.0;orf1 len=183 frame:-2 start:1756 end:1208 gi|594042480|ref|XP_006045774.1| PREDICTED: coactosin-like protein [Bubalus bubalis]	1	2	2	23.6	19.97	5.4634e-27	35041000	2920100
>Cluster-17557.0; len=101 start:136 end:437; minus strand	1	2	1	27.7	11.074	5.4895e-06	59404000	8486300
>Cluster-22442.0;orf2 len=159 frame:3 start:12 end:488 gi|591379190|ref|XP_007064143.1| PREDICTED: uncharacterized protein LOC102945886 [Chelonia mydas];>Cluster-25114.0;orf1 len=157 frame:1 start:1 end:471 gi|524984012|ref|XP_005039995.1| PREDICTED: uncharacterized protein LOC101819927 [Ficedula albicollis];>Cluster-8535.257;orf1 len=153 frame:3 start:3 end:461 gi|733869626|ref|XP_010708157.1| P…	19	3	3	14.6	18.102	1.2578e-05	381400000	76279000
>Cluster-8535.14687;orf1 len=244 frame:2 start:2 end:733 gi|345481856|ref|XP_003424472.1| PREDICTED: ras-like GTP-binding protein Rho1 isoform X2 [Nasonia vitripennis]>gi|645036515|ref|XP_008217015.1| PREDICTED: ras-like GTP-binding protein Rho1 isoform X2 [Nasonia vitripennis];>Cluster-18488.0;orf1 len=233 frame:3 start:3 end:701 gi|119576941|gb|EAW56537.1| hCG2043376, isoform CRA_c [Homo sapien…	5	1	1	5.8	27.25	2.327e-06	33443000	2786900
>Cluster-18491.0;orf1 len=601 frame:-1 start:1882 end:80 gi|645018326|ref|XP_008205952.1| PREDICTED: papilin [Nasonia vitripennis]	1	4	3	8.2	65.998	1.3632e-12	177810000	5080300
>Cluster-18491.1; len=421 start:120 end:1379; minus strand;>Cluster-21176.0; len=250 start:132 end:878; minus strand	2	2	1	8.8	46.35	2.5322e-13	0	0
>Cluster-6023.0;orf1 len=209 frame:-2 start:813 end:187 gi|532111621|ref|XP_005340505.1| PREDICTED: ras-related protein Rab-7a [Ictidomys tridecemlineatus];>Cluster-18591.0;orf1 len=186 frame:2 start:2 end:559 gi|326927938|ref|XP_003210144.1| PREDICTED: ras-related protein Rab-7a [Meleagris gallopavo]>gi|363738555|ref|XP_003642026.1| PREDICTED: ras-related protein Rab-7a isoform 1 [Gallus gallus]…	2	2	2	14.4	23.646	2.7315e-16	14165000	1011800
>Cluster-19200.0; len=308 start:49 end:970; minus strand;>Cluster-22686.0;orf1 len=296 frame:-3 start:936 end:49 gi|513173824|ref|XP_001232628.3| PREDICTED: uncharacterized protein LOC769368 isoform X1 [Gallus gallus];>Cluster-20461.0; len=284 start:49 end:898; minus strand	3	1	1	5.9	34.08	0.0092496	0	0
>Cluster-19461.0; len=373 start:1 end:1117; minus strand	1	2	2	8	42.516	6.8959e-06	61815000	2687600
>Cluster-19643.0;orf1 len=532 frame:-3 start:2117 end:522 gi|345490901|ref|XP_001607916.2| PREDICTED: spermine oxidase-like [Nasonia vitripennis];>Cluster-19643.1;orf1 len=280 frame:-3 start:2407 end:1568 gi|345490901|ref|XP_001607916.2| PREDICTED: spermine oxidase-like [Nasonia vitripennis];>Cluster-19643.1;orf2 len=281 frame:-2 start:1364 end:522 gi|345490901|ref|XP_001607916.2| PREDICTED: sper…	3	5	5	12.4	60.346	1.0147e-11	73561000	2452000
>Cluster-19762.0; len=132 start:285 end:679; minus strand	1	1	1	11.4	14.346	0.00015942	19856000	2836600
>Cluster-20717.0; len=370 start:148 end:1257; minus strand	1	1	1	5.4	43.614	0.0033989	24696000	1372000
>Cluster-20989.0;orf1 len=178 frame:3 start:93 end:626 gi|289684219|ref|NP_001166258.1| cuticular protein RR-1 family member 20 precursor [Nasonia vitripennis]>gi|644995371|ref|XP_008208811.1| PREDICTED: cuticular protein RR-1 family member 20 isoform X1 [Nasonia vitripennis]	1	2	2	15.3	19.128	2.9779e-15	57433000	9572100
>Cluster-21389.1; len=141 start:328 end:750; minus strand	1	1	1	9.2	16.229	3.4626e-05	18576000	4643900
>Cluster-8535.24224;orf1 len=277 frame:-1 start:1526 end:696 gi|345489107|ref|XP_001606683.2| PREDICTED: pyrroline-5-carboxylate reductase 2 [Nasonia vitripennis]>gi|645013900|ref|XP_008205310.1| PREDICTED: pyrroline-5-carboxylate reductase 2 [Nasonia vitripennis];>Cluster-8535.24225;orf1 len=277 frame:-2 start:1526 end:696 gi|345489107|ref|XP_001606683.2| PREDICTED: pyrroline-5-carboxylate reduc…	4	1	1	4.7	29.116	4.8588e-06	10089000	720660
>Cluster-21963.0;orf1 len=468 frame:-2 start:1583 end:180 gi|397469027|ref|XP_003806166.1| PREDICTED: elongation factor Tu, mitochondrial isoform X1 [Pan paniscus]	1	1	1	3	51.193	0.0078596	17301000	576710
>Cluster-22283.0; len=163 start:128 end:615; minus strand	1	8	8	51.9	19.999	8.6805e-28	1929700000	148440000
>Cluster-22759.0;orf1 len=339 frame:3 start:3 end:1019 gi|345490032|ref|XP_001602777.2| PREDICTED: trypsin alpha-3 [Nasonia vitripennis]	1	1	1	3.3	36.95	0.002934	19037000	1119800
>Cluster-22920.0;orf1 len=348 frame:1 start:1 end:1044 gi|874469635|ref|XP_012953645.1| PREDICTED: malate dehydrogenase, cytoplasmic isoform X2 [Anas platyrhynchos];>Cluster-516.0;orf1 len=340 frame:1 start:1 end:1020 gi|821012441|ref|XP_012356614.1| PREDICTED: malate dehydrogenase, cytoplasmic isoform X2 [Nomascus leucogenys];>Cluster-2486.0;orf1 len=210 frame:3 start:21 end:650 gi|5174539|ref|N…	3	2	2	9.2	37.875	1.5374e-07	46253000	2890800
>Cluster-22929.0; len=315 start:1 end:941; minus strand	1	4	4	13.3	37.628	1.0998e-11	474700000	27923000
>Cluster-23117.0; len=56 start:536 end:703; minus strand	1	1	1	23.6	5.8363	0.0021221	46352000	23176000
>Cluster-23132.0;orf1 len=467 frame:2 start:203 end:1603 gi|119583083|gb|EAW62679.1| heterogeneous nuclear ribonucleoprotein K, isoform CRA_e [Homo sapiens]	1	3	3	10.3	51.27	4.1839e-11	82220000	3425800
>Cluster-23148.1;orf1 len=431 frame:3 start:90 end:1382 gi|345488684|ref|XP_001604342.2| PREDICTED: ornithine decarboxylase-like [Nasonia vitripennis];>Cluster-23148.0;orf1 len=377 frame:2 start:50 end:1180 gi|345488684|ref|XP_001604342.2| PREDICTED: ornithine decarboxylase-like [Nasonia vitripennis]	2	1	1	1.9	48.668	0.0025873	1183500000	45521000
>Cluster-23325.1;orf1 len=526 frame:-2 start:1742 end:165 gi|229577317|ref|NP_001153351.1| glucosamine (N-acetyl)-6-sulfatase precursor [Nasonia vitripennis];>Cluster-23325.0;orf1 len=503 frame:-2 start:1673 end:165 gi|229577317|ref|NP_001153351.1| glucosamine (N-acetyl)-6-sulfatase precursor [Nasonia vitripennis]	2	1	1	1.9	59.682	0.00094087	0	0
>Cluster-2428.0;orf1 len=175 frame:2 start:2 end:526 gi|488584167|ref|XP_004477467.1| PREDICTED: peptidyl-prolyl cis-trans isomerase H isoform X1 [Dasypus novemcinctus]	1	1	1	5.2	18.907	0.0059466	8655300	786850
>Cluster-2434.0;orf1 len=304 frame:-3 start:914 end:3 gi|156564403|ref|NP_000916.2| pyruvate dehydrogenase E1 component subunit beta, mitochondrial isoform 1 precursor [Homo sapiens]>gi|350534966|ref|NP_001233347.1| pyruvate dehydrogenase E1 component subunit beta, mitochondrial [Pan troglodytes]>gi|397480829|ref|XP_003811670.1| PREDICTED: pyruvate dehydrogenase E1 component subunit beta, mitocho…	1	1	1	5.3	33.25	0.0059116	40578000	2387000
>Cluster-24805.2;orf1 len=231 frame:1 start:748 end:1440 gi|766935428|ref|XP_011500079.1| PREDICTED: endocuticle structural glycoprotein SgAbd-2 [Ceratosolen solmsi marchali];>Cluster-24805.1;orf1 len=202 frame:2 start:530 end:1135 gi|766935428|ref|XP_011500079.1| PREDICTED: endocuticle structural glycoprotein SgAbd-2 [Ceratosolen solmsi marchali]	2	2	2	12.2	25.776	2.709e-06	54914000	4576200
>Cluster-25021.0;orf1 len=240 frame:-2 start:1233 end:514 gi|755778241|ref|XP_011285993.1| PREDICTED: GTP-binding nuclear protein Ran [Felis catus];>Cluster-12929.2;orf1 len=233 frame:1 start:4 end:702 gi|170591300|ref|XP_001900408.1| GTP-binding nuclear protein RAN/TC4 [Brugia malayi]>gi|384872616|sp|P38542.2|RAN_BRUMA RecName: Full=GTP-binding nuclear protein Ran; AltName: Full=GTPase Ran; AltN…	5	3	3	14.2	26.717	3.1637e-09	82443000	6870200
>Cluster-25281.0;orf1 len=177 frame:-1 start:638 end:108 gi|156550139|ref|XP_001606032.1| PREDICTED: coiled-coil domain-containing protein 149 [Nasonia vitripennis]>gi|645006174|ref|XP_008204354.1| PREDICTED: coiled-coil domain-containing protein 149 [Nasonia vitripennis]	1	1	1	8	20.272	0.012071	21971000	2197100
>Cluster-26373.0; len=159 start:1 end:476; minus strand	1	7	7	46.5	18.794	5.5679e-26	789500000	71773000
>Cluster-26696.0;orf1 len=400 frame:2 start:80 end:1279 gi|156553508|ref|XP_001600858.1| PREDICTED: lysosomal aspartic protease-like [Nasonia vitripennis]	1	1	1	4	45.755	0.00014972	77413000	4553700
>Cluster-281.0;orf1 len=364 frame:-1 start:1215 end:124 gi|544480288|ref|XP_005575495.1| PREDICTED: macrophage-capping protein isoform X1 [Macaca fascicularis]	1	1	1	3.6	40.026	0.0057681	20791000	1386000
>Cluster-4396.0;orf1 len=389 frame:-3 start:1466 end:300 gi|594622025|ref|XP_007198794.1| PREDICTED: LOW QUALITY PROTEIN: heterogeneous nuclear ribonucleoprotein D (AU-rich element RNA binding protein 1, 37kDa) [Balaenoptera acutorostrata scammoni];>Cluster-4396.1;orf1 len=370 frame:-3 start:1409 end:300 gi|655857512|ref|XP_008265902.1| PREDICTED: heterogeneous nuclear ribonucleoprotein D0 [Oryct…	6	2	2	5.2	41.352	0.00095426	12469000	890640
>Cluster-2943.0; len=93 start:50 end:328; minus strand;>Cluster-3495.0; len=93 start:50 end:328; minus strand	2	1	1	12	10.803	0.00060692	16625000	4156400
>Cluster-2949.2;orf1 len=220 frame:3 start:27 end:686 gi|752438295|ref|XP_002929958.2| PREDICTED: transgelin-2 [Ailuropoda melanoleuca]>gi|752438297|ref|XP_011214918.1| PREDICTED: transgelin-2 [Ailuropoda melanoleuca];>Cluster-3623.0; len=140 start:1 end:420; minus strand;>Cluster-5360.0;orf1 len=109 frame:2 start:2 end:328 gi|335286672|ref|XP_003125720.2| PREDICTED: transgelin-2 isoformX1 [Sus s…	4	3	3	15.5	24.399	2.0923e-12	86248000	5749900
>Cluster-3287.0;orf1 len=355 frame:2 start:29 end:1093 gi|472386205|ref|XP_004412456.1| PREDICTED: L-lactate dehydrogenase B chain-like isoform X1 [Odobenus rosmarus divergens];>Cluster-3287.1; len=178 start:1 end:532; minus strand;>Cluster-26013.1; len=231 start:1 end:691; minus strand	3	5	4	17.8	38.874	1.8342e-15	180490000	9499700
>Cluster-558.0;orf2 len=518 frame:2 start:2 end:1555 gi|21361547|ref|NP_002930.2| ribonuclease inhibitor [Homo sapiens]>gi|42794608|ref|NP_976318.1| ribonuclease inhibitor [Homo sapiens]>gi|42822864|ref|NP_976322.1| ribonuclease inhibitor [Homo sapiens]>gi|42822866|ref|NP_976323.1| ribonuclease inhibitor [Homo sapiens]>gi|42822868|ref|NP_976321.1| ribonuclease inhibitor [Homo sapiens]>gi|42822870…	4	2	2	4.8	55.819	1.6742e-09	51084000	1824400
>Cluster-8535.2913;orf1 len=185 frame:2 start:230 end:784 gi|156548876|ref|XP_001606447.1| PREDICTED: histone H2A [Nasonia vitripennis];>Cluster-8522.0;orf2 len=161 frame:2 start:2 end:484 gi|545823276|ref|XP_005663563.1| PREDICTED: histone H2A type 2-A-like [Sus scrofa]>gi|545823305|ref|XP_003355263.3| PREDICTED: histone H2A type 2-C-like isoform X1 [Sus scrofa];>Cluster-8535.8116;orf1 len=156 f…	35	3	1	19	19.912	3.4176e-08	329310000	41164000
>Cluster-4490.0;orf1 len=365 frame:3 start:3 end:1097 gi|635139449|ref|XP_008016570.1| PREDICTED: malate dehydrogenase, mitochondrial isoform X1 [Chlorocebus sabaeus];>Cluster-26301.0; len=321 start:149 end:1109; minus strand	2	2	2	9.9	38.292	1.4657e-09	21892000	995090
>Cluster-462.0; len=250 start:139 end:888; minus strand	1	3	3	12.4	28.723	1.7043e-07	20220000	1348000
>Cluster-4624.0; len=709 start:687 end:2811; minus strand	1	3	2	6.2	76.806	5.6642e-14	19518000	557650
>Cluster-8535.11998;orf1 len=374 frame:-3 start:9637 end:8516 gi|156538338|ref|XP_001604472.1| PREDICTED: serine/threonine-protein phosphatase PP1-beta catalytic subunit [Nasonia vitripennis];>Cluster-8535.12532;orf1 len=374 frame:-3 start:11135 end:10014 gi|156538338|ref|XP_001604472.1| PREDICTED: serine/threonine-protein phosphatase PP1-beta catalytic subunit [Nasonia vitripennis];>Cluster-8535…	15	2	2	6.2	42.201	1.0129e-10	26978000	1419900
>Cluster-8535.15131;orf1 len=1204 frame:3 start:5079 end:8690 gi|645021047|ref|XP_008207429.1| PREDICTED: LOW QUALITY PROTEIN: talin-2 [Nasonia vitripennis];>Cluster-5300.2; len=636 start:381 end:2287; minus strand	2	1	1	0.9	131.41	0.0043491	0	0
>Cluster-5983.5;orf1 len=379 frame:-2 start:1306 end:170 gi|795094971|ref|XP_011789804.1| PREDICTED: phosphate carrier protein, mitochondrial isoform X2 [Colobus angolensis palliatus]>gi|795094978|ref|XP_011789813.1| PREDICTED: phosphate carrier protein, mitochondrial isoform X2 [Colobus angolensis palliatus]>gi|795094985|ref|XP_011789822.1| PREDICTED: phosphate carrier protein, mitochondrial iso…	1	1	1	2.1	42.069	0.011904	0	0
>Cluster-5983.6;orf1 len=221 frame:-1 start:966 end:304 gi|725577125|ref|XP_003931694.2| PREDICTED: rho GDP-dissociation inhibitor 1 isoform X1 [Saimiri boliviensis boliviensis]	1	1	1	6.8	24.937	3.3138e-05	26910000	3844300
>Cluster-6140.0;orf1 len=319 frame:-1 start:958 end:2 gi|507654714|ref|XP_004633686.1| PREDICTED: leucine-rich repeat-containing protein 59 [Octodon degus];>Cluster-8221.0;orf1 len=311 frame:-1 start:935 end:3 gi|507654714|ref|XP_004633686.1| PREDICTED: leucine-rich repeat-containing protein 59 [Octodon degus]	2	1	1	3.8	35.923	0.0013585	0	0
>Cluster-6454.1;orf1 len=453 frame:-1 start:1361 end:3 gi|471377936|ref|XP_004376774.1| PREDICTED: heat shock protein HSP 90-alpha isoform X1 [Trichechus manatus latirostris];>Cluster-6454.4;orf1 len=344 frame:-1 start:1854 end:823 gi|528768092|gb|EPY87751.1| heat shock protein HSP 90-alpha [Camelus ferus];>Cluster-23922.1; len=370 start:257 end:1364; minus strand;>Cluster-23922.3; len=81 start:1…	4	7	4	19	53.468	5.3911e-37	91558000	3980800
>Cluster-6459.0; len=576 start:127 end:1852; minus strand	1	10	2	21.2	61.75	6.1152e-33	69542000	2173200
>Cluster-7020.1;orf1 len=146 frame:-3 start:612 end:175 gi|50592994|ref|NP_003320.2| thioredoxin isoform 1 [Homo sapiens]>gi|209413800|ref|NP_001125903.1| thioredoxin [Pongo abelii]>gi|332217350|ref|XP_003257823.1| PREDICTED: thioredoxin [Nomascus leucogenys]>gi|332832610|ref|XP_001142154.2| PREDICTED: thioredoxin [Pan troglodytes]>gi|397479234|ref|XP_003810932.1| PREDICTED: thioredoxin isoform X…	2	2	2	15.2	15.846	0.00016457	80902000	8989100
>Cluster-7187.0; len=516 start:13 end:1560; minus strand	1	3	3	8.3	58.749	1.7033e-13	42783000	1426100
>Cluster-7230.0; len=115 start:1 end:343; minus strand	1	1	1	8.7	12.275	0.0083933	40051000	10013000
>Cluster-7269.0;orf1 len=553 frame:-3 start:1894 end:236 gi|471392988|ref|XP_004380749.1| PREDICTED: protein disulfide-isomerase A3 isoform X1 [Trichechus manatus latirostris];>Cluster-23558.0; len=401 start:236 end:1438; minus strand;>Cluster-15217.0; len=403 start:181 end:1389; minus strand	3	4	4	10.7	61.517	3.1232e-10	134510000	4076000
>Cluster-7358.1;orf1 len=244 frame:-2 start:1067 end:336 gi|67782305|ref|NP_000627.2| superoxide dismutase [Mn], mitochondrial isoform A precursor [Homo sapiens]>gi|67782307|ref|NP_001019636.1| superoxide dismutase [Mn], mitochondrial isoform A precursor [Homo sapiens]>gi|15214595|gb|AAH12423.1| Superoxide dismutase 2, mitochondrial [Homo sapiens]>gi|30016937|gb|AAP03428.1| superoxide dismutase 2…	2	1	1	5.8	27.08	0.011883	0	0
>Cluster-7404.0;orf1 len=493 frame:3 start:3 end:1481 gi|397503050|ref|XP_003822149.1| PREDICTED: 6-phosphogluconate dehydrogenase, decarboxylating isoform X2 [Pan paniscus]	1	2	1	5.7	53.957	2.8679e-07	14563000	606800
>Cluster-7640.7;orf1 len=138 frame:-3 start:466 end:53 gi|667298081|ref|XP_008580161.1| PREDICTED: histone H2B type 1-M-like [Galeopterus variegatus];>Cluster-7640.2;orf1 len=132 frame:-3 start:448 end:53 gi|690443957|ref|XP_009322653.1| PREDICTED: histone H2B 5-like isoform X1 [Pygoscelis adeliae];>Cluster-7640.3;orf1 len=132 frame:-3 start:409 end:14 gi|678215695|gb|KFV82674.1| Histone H2B 1/2/…	6	4	2	29.9	15.156	1.2675e-10	194140000	24267000
>Cluster-7900.0; len=309 start:1 end:925; minus strand	1	1	1	3.6	32.17	1.0947e-23	0	0
>Cluster-7911.0;orf1 len=234 frame:1 start:1 end:702 gi|4504183|ref|NP_000843.1| glutathione S-transferase P [Homo sapiens]>gi|121746|sp|P09211.2|GSTP1_HUMAN RecName: Full=Glutathione S-transferase P; AltName: Full=GST class-pi; AltName: Full=GSTP1-1>gi|4389047|pdb|12GS|A Chain A, Glutathione S-transferase Complexed With S-nonyl-glutathione>gi|4389048|pdb|12GS|B Chain B, Glutathione S-transferase…	1	3	3	22.3	25.998	3.5071e-16	104980000	9543600
>Cluster-8134.1;orf1 len=120 frame:-2 start:788 end:429 gi|821032180|ref|XP_012355092.1| PREDICTED: 60 kDa heat shock protein, mitochondrial isoform X1 [Nomascus leucogenys]	1	2	2	26.9	12.369	1.4897e-125	45657000	6522400
>Cluster-8134.1;orf2 len=499 frame:-1 start:2241 end:745 gi|821032180|ref|XP_012355092.1| PREDICTED: 60 kDa heat shock protein, mitochondrial isoform X1 [Nomascus leucogenys]	1	5	4	16.3	53.792	8.1817e-50	168790000	6492000
>Cluster-8189.0;orf2 len=184 frame:-2 start:593 end:42 gi|675652260|ref|XP_008992534.1| PREDICTED: 40S ribosomal protein S10 [Callithrix jacchus];>Cluster-8535.30055;orf1 len=168 frame:3 start:3 end:506 gi|62087910|dbj|BAD92402.1| ribosomal protein S10 variant [Homo sapiens]	2	1	1	4.9	20.625	0.0079378	15260000	1695600
>Cluster-8349.0; len=132 start:59 end:453; minus strand	1	1	1	6.8	14.887	0.010169	0	0
>Cluster-8377.0; len=178 start:1 end:533; minus strand;>Cluster-8535.1132; len=154 start:1 end:461; minus strand	2	1	1	8.4	19.301	2.1507e-27	0	0
>Cluster-8478.0;orf1 len=198 frame:-2 start:594 end:1 gi|470530371|ref|XP_004368238.1| GDPmannose pyrophosphorylase [Acanthamoeba castellanii str. Neff]>gi|440804606|gb|ELR25483.1| GDPmannose pyrophosphorylase [Acanthamoeba castellanii str. Neff]	1	1	1	6.1	21.9	0.0052108	0	0
>Cluster-8494.0;orf1 len=171 frame:1 start:1 end:513 gi|826279832|ref|XP_012494914.1| PREDICTED: transcription factor BTF3 homolog 4 isoform X1 [Propithecus coquereli]	1	1	1	7.1	18.678	0.0074551	0	0
>Cluster-8535.10031;orf1 len=569 frame:3 start:177 end:1883 gi|766934641|ref|XP_011499651.1| PREDICTED: non-specific lipid-transfer protein-like [Ceratosolen solmsi marchali]	1	3	3	8.5	62.247	2.8002e-26	51782000	2071300
>Cluster-8535.10222;orf1 len=555 frame:-3 start:2244 end:580 gi|300116732|ref|NP_001177859.1| T-complex protein 1 subunit gamma [Nasonia vitripennis];>Cluster-8535.18223;orf1 len=555 frame:-2 start:2244 end:580 gi|300116732|ref|NP_001177859.1| T-complex protein 1 subunit gamma [Nasonia vitripennis]	2	1	1	2	60.949	0.0016417	11925000	350740
>Cluster-8535.10265;orf1 len=532 frame:-3 start:1597 end:2 gi|645042380|ref|XP_008210721.1| PREDICTED: nucleobindin-2 [Nasonia vitripennis]>gi|645042383|ref|XP_008210722.1| PREDICTED: nucleobindin-2 [Nasonia vitripennis]>gi|645042386|ref|XP_008210723.1| PREDICTED: nucleobindin-2 [Nasonia vitripennis];>Cluster-8535.14442;orf1 len=516 frame:-3 start:1549 end:2 gi|645042380|ref|XP_008210721.1| PREDI…	2	3	3	7.5	63.624	1.9813e-14	135000000	6136400
>Cluster-8535.14674;orf1 len=415 frame:3 start:6 end:1250 gi|156554092|ref|XP_001600501.1| PREDICTED: isocitrate dehydrogenase [NAD] subunit gamma, mitochondrial-like [Nasonia vitripennis]>gi|644996799|ref|XP_008208172.1| PREDICTED: isocitrate dehydrogenase [NAD] subunit gamma, mitochondrial-like [Nasonia vitripennis]>gi|644996801|ref|XP_008208173.1| PREDICTED: isocitrate dehydrogenase [NAD] subu…	2	4	4	15.2	45.436	5.4478e-68	186010000	10334000
>Cluster-8535.10302;orf1 len=678 frame:1 start:1006 end:3039 gi|345498449|ref|XP_001607488.2| PREDICTED: gamma-glutamyltranspeptidase 1 [Nasonia vitripennis]	1	22	22	38.8	74.976	0	79485000000	2408600000
>Cluster-8535.10319;orf1 len=101 frame:2 start:2 end:304 gi|645011635|ref|XP_001601301.2| PREDICTED: peroxisomal hydratase-dehydrogenase-epimerase [Nasonia vitripennis]	1	3	3	45	10.736	1.621e-22	47583000	6797600
>Cluster-8535.10370;orf1 len=380 frame:-1 start:4333 end:3194 gi|345491740|ref|XP_003426698.1| PREDICTED: DNA helicase MCM8 [Nasonia vitripennis]>gi|645020716|ref|XP_008207279.1| PREDICTED: DNA helicase MCM8 [Nasonia vitripennis]	1	6	6	25.1	41.254	1.5079e-30	1156800000	77123000
>Cluster-8535.16936;orf1 len=673 frame:-2 start:5831 end:3813 gi|645033820|ref|XP_008218132.1| PREDICTED: LOW QUALITY PROTEIN: leupaxin-like [Nasonia vitripennis];>Cluster-8535.11061;orf1 len=619 frame:-2 start:5669 end:3813 gi|645033820|ref|XP_008218132.1| PREDICTED: LOW QUALITY PROTEIN: leupaxin-like [Nasonia vitripennis];>Cluster-8535.10375;orf1 len=570 frame:-2 start:2299 end:590 gi|645033820…	3	2	2	6.1	74.222	9.5314e-14	195370000	5141400
>Cluster-8535.19124;orf1 len=756 frame:1 start:415 end:2682 gi|665794470|ref|XP_008544932.1| PREDICTED: calpain-A isoform X2 [Microplitis demolitor];>Cluster-8535.12460;orf1 len=755 frame:2 start:1637 end:3901 gi|156549579|ref|XP_001602959.1| PREDICTED: calpain-B-like isoform X5 [Nasonia vitripennis];>Cluster-8535.14550;orf1 len=746 frame:1 start:601 end:2838 gi|156549579|ref|XP_001602959.1| PRED…	7	2	2	3.7	87.443	8.2225e-11	14086000	361180
>Cluster-8535.10450; len=148 start:679 end:1123; minus strand	1	6	6	51	16.62	1.687e-20	232600000	25844000
>Cluster-8535.13086;orf1 len=1111 frame:2 start:2 end:3334 gi|345486596|ref|XP_003425507.1| PREDICTED: membrane-associated guanylate kinase, WW and PDZ domain-containing protein 1 isoform X1 [Nasonia vitripennis]>gi|644991966|ref|XP_008202733.1| PREDICTED: membrane-associated guanylate kinase, WW and PDZ domain-containing protein 1 isoform X1 [Nasonia vitripennis]>gi|644991969|ref|XP_008202734.1|…	3	1	1	1.2	124.12	0.010176	0	0
>Cluster-8535.10525;orf1 len=3194 frame:-3 start:10736 end:1155 gi|766926769|ref|XP_011495348.1| PREDICTED: laminin subunit alpha [Ceratosolen solmsi marchali];>Cluster-8535.10526;orf2 len=1533 frame:-2 start:5753 end:1155 gi|766926769|ref|XP_011495348.1| PREDICTED: laminin subunit alpha [Ceratosolen solmsi marchali]	2	28	16	12.3	352.77	1.5528e-172	1010100000	6313400
>Cluster-8535.10526;orf1 len=2193 frame:-1 start:12276 end:5698 gi|766926769|ref|XP_011495348.1| PREDICTED: laminin subunit alpha [Ceratosolen solmsi marchali]	1	15	3	10.6	242.72	3.4567e-123	75586000	719870
>Cluster-8535.10563;orf1 len=342 frame:-3 start:1086 end:61 gi|322794521|gb|EFZ17572.1| hypothetical protein SINV_07657, partial [Solenopsis invicta]	1	4	4	15.5	39.907	9.3059e-10	89814000	4727100
>Cluster-8535.10570;orf1 len=254 frame:2 start:2 end:763 gi|156554116|ref|XP_001602967.1| PREDICTED: probable protein disulfide-isomerase A6 [Nasonia vitripennis]	1	5	5	24.1	27.854	2.0083e-12	188250000	14480000
>Cluster-8535.1058;orf2 len=513 frame:-1 start:2389 end:851 gi|532094091|ref|XP_005332725.1| PREDICTED: protein disulfide-isomerase [Ictidomys tridecemlineatus];>Cluster-18996.0; len=507 start:35 end:1554; minus strand	2	8	8	17.4	57.504	2.3906e-29	302770000	8410300
>Cluster-8535.16837;orf1 len=479 frame:-1 start:3258 end:1822 gi|645010277|ref|XP_008213460.1| PREDICTED: synapse-associated protein of 47 kDa isoform X1 [Nasonia vitripennis];>Cluster-8535.17695;orf1 len=475 frame:-1 start:3246 end:1822 gi|645010277|ref|XP_008213460.1| PREDICTED: synapse-associated protein of 47 kDa isoform X1 [Nasonia vitripennis];>Cluster-8535.10604;orf1 len=423 frame:-1 start…	4	1	1	3.6	50.507	0.0045876	37467000	1629000
>Cluster-8535.10603;orf1 len=116 frame:-2 start:625 end:278 gi|645031105|ref|XP_008210047.1| PREDICTED: ATPase inhibitor mai-2, mitochondrial-like isoform X2 [Nasonia vitripennis]	1	2	2	26.1	13.06	7.3156e-24	148350000	14835000
>Cluster-8535.10636;orf1 len=450 frame:-2 start:2045 end:696 gi|288856263|ref|NP_001165787.1| NADH dehydrogenase (ubiquinone) 1 alpha subcomplex, 9, 39kDa [Nasonia vitripennis]>gi|645014030|ref|XP_008203304.1| PREDICTED: NADH dehydrogenase (ubiquinone) 1 alpha subcomplex, 9, 39kDa isoform X1 [Nasonia vitripennis]	1	1	1	2.2	50.441	2.2635e-10	9542300	340800
>Cluster-8535.10706;orf1 len=531 frame:3 start:222 end:1814 gi|766922016|ref|XP_011505553.1| PREDICTED: probable methylmalonate-semialdehyde dehydrogenase [acylating], mitochondrial [Ceratosolen solmsi marchali]	1	11	11	30.9	57.475	1.2249e-61	332760000	14468000
>Cluster-8535.10709;orf1 len=2428 frame:-1 start:7652 end:369 gi|156553897|ref|XP_001601352.1| PREDICTED: spectrin alpha chain [Nasonia vitripennis];>Cluster-8535.14451;orf1 len=2428 frame:-1 start:7652 end:369 gi|156553897|ref|XP_001601352.1| PREDICTED: spectrin alpha chain [Nasonia vitripennis];>Cluster-8535.16752;orf1 len=2428 frame:-1 start:7652 end:369 gi|156553897|ref|XP_001601352.1| PREDIC…	4	4	4	2.2	278.95	1.0082e-09	27004000	187530
>Cluster-8535.10714;orf1 len=670 frame:-2 start:3943 end:1934 gi|645025152|ref|XP_008212918.1| PREDICTED: uncharacterized protein LOC100119874 [Nasonia vitripennis]	1	26	26	48.7	76.743	0	5798400000	175710000
>Cluster-8535.10725;orf1 len=220 frame:3 start:249 end:908 gi|289063438|ref|NP_001165913.1| glutathione S-transferase D1 [Nasonia vitripennis]	1	3	3	18.3	24.923	6.1693e-12	554690000	55469000
>Cluster-8535.1075;orf1 len=926 frame:1 start:70 end:2847 gi|41054603|ref|NP_955880.1| alpha-actinin-4 [Danio rerio]>gi|32766291|gb|AAH54901.1| Actinin, alpha 4 [Danio rerio]>gi|269148256|gb|ACZ28499.1| Actn4 [Danio rerio]	1	7	3	8.4	105.98	2.469e-27	92386000	1649800
>Cluster-8535.10797;orf1 len=745 frame:3 start:228 end:2462 gi|645007516|ref|XP_008216297.1| PREDICTED: GMP synthase [glutamine-hydrolyzing] [Nasonia vitripennis]>gi|645007518|ref|XP_008216298.1| PREDICTED: GMP synthase [glutamine-hydrolyzing] [Nasonia vitripennis]>gi|645007520|ref|XP_008216299.1| PREDICTED: GMP synthase [glutamine-hydrolyzing] [Nasonia vitripennis]>gi|645007522|ref|XP_008216300.…	3	1	1	1.3	82.001	2.8941e-05	9865300	246630
>Cluster-8535.10900;orf1 len=846 frame:-2 start:2688 end:151 gi|156542973|ref|XP_001602638.1| PREDICTED: WD repeat-containing protein 75 [Nasonia vitripennis]	1	1	1	1.3	95.608	3.2133e-05	138170000	3140200
>Cluster-8535.10908;orf1 len=238 frame:-1 start:1177 end:464 gi|345482285|ref|XP_003424562.1| PREDICTED: V-type proton ATPase subunit E [Nasonia vitripennis];>Cluster-4665.0;orf1 len=257 frame:-3 start:1275 end:505 gi|675640355|ref|XP_009004617.1| PREDICTED: V-type proton ATPase subunit E 1 [Callithrix jacchus]	2	6	6	37.1	27.314	6.724e-34	587460000	48955000
>Cluster-8535.10939;orf1 len=416 frame:-3 start:2867 end:1620 gi|766930578|ref|XP_011497433.1| PREDICTED: probable aspartate aminotransferase, cytoplasmic [Ceratosolen solmsi marchali];>Cluster-8535.876;orf1 len=417 frame:-1 start:1642 end:392 gi|795132985|ref|XP_011790961.1| PREDICTED: aspartate aminotransferase, cytoplasmic [Colobus angolensis palliatus];>Cluster-7145.0;orf1 len=288 frame:3 sta…	3	5	5	16.9	46.96	2.56e-33	116810000	4672300
>Cluster-8535.10942;orf1 len=445 frame:-3 start:1584 end:250 gi|752889859|ref|XP_011262896.1| PREDICTED: rab GDP dissociation inhibitor beta [Camponotus floridanus]>gi|307172388|gb|EFN63854.1| Rab GDP dissociation inhibitor beta [Camponotus floridanus]	1	5	5	15.8	49.94	1.1723e-15	169530000	6520500
>Cluster-8535.10978;orf1 len=340 frame:-3 start:2702 end:1683 gi|766940263|ref|XP_011502722.1| PREDICTED: peptidylglycine alpha-hydroxylating monooxygenase isoform X1 [Ceratosolen solmsi marchali]	1	2	2	8.6	38.361	0.00024765	103870000	6924800
>Cluster-8535.11013;orf1 len=543 frame:3 start:3 end:1631 gi|322790475|gb|EFZ15353.1| hypothetical protein SINV_02533, partial [Solenopsis invicta]	1	7	7	17.5	57.653	1.8257e-50	723850000	31472000
>Cluster-8535.1114; len=167 start:97 end:597; minus strand;>Cluster-18999.0;orf1 len=173 frame:-3 start:637 end:119 gi|148704795|gb|EDL36742.1| cofilin 2, muscle, isoform CRA_b, partial [Mus musculus]	2	4	4	36.1	18.502	4.4424e-14	789960000	78996000
>Cluster-8535.11225;orf1 len=1411 frame:3 start:57 end:4289 gi|766940371|ref|XP_011502780.1| PREDICTED: nidogen-2 [Ceratosolen solmsi marchali];>Cluster-8535.11226;orf1 len=1365 frame:3 start:57 end:4151 gi|752898069|ref|XP_011267372.1| PREDICTED: nidogen-2 isoform X3 [Camponotus floridanus];>Cluster-8535.9462;orf1 len=1323 frame:3 start:57 end:4025 gi|572307775|ref|XP_006619735.1| PREDICTED: nid…	7	10	10	11.1	155.14	1.2576e-50	465530000	6846000
>Cluster-8535.11251;orf1 len=659 frame:2 start:194 end:2170 gi|645019897|ref|XP_008206991.1| PREDICTED: leukocyte elastase inhibitor isoform X1 [Nasonia vitripennis];>Cluster-8535.18158;orf1 len=635 frame:2 start:194 end:2098 gi|645019900|ref|XP_001603946.3| PREDICTED: leukocyte elastase inhibitor isoform X2 [Nasonia vitripennis]	2	12	12	23.4	73.8	1.8782e-52	1843500000	61449000
>Cluster-8535.11281;orf1 len=593 frame:1 start:436 end:2214 gi|289177104|ref|NP_001165965.1| carboxylesterase clade E, member 11 precursor [Nasonia vitripennis];>Cluster-8535.21714;orf1 len=593 frame:1 start:436 end:2214 gi|289177104|ref|NP_001165965.1| carboxylesterase clade E, member 11 precursor [Nasonia vitripennis];>Cluster-8535.15147;orf1 len=569 frame:2 start:77 end:1783 gi|289177106|ref|N…	3	3	3	5.4	66.716	3.3455e-09	83569000	2785600
>Cluster-8535.9883;orf1 len=278 frame:-1 start:1743 end:910 gi|645024502|ref|XP_008213876.1| PREDICTED: triosephosphate isomerase isoform X1 [Nasonia vitripennis];>Cluster-8535.11293;orf1 len=272 frame:-3 start:1725 end:910 gi|752883136|ref|XP_011259256.1| PREDICTED: triosephosphate isomerase [Camponotus floridanus]>gi|307177170|gb|EFN66403.1| Triosephosphate isomerase [Camponotus floridanus]	2	6	6	27.1	30.285	3.494e-39	555630000	37042000
>Cluster-8535.11304;orf1 len=666 frame:1 start:1 end:1998 gi|345497248|ref|XP_003427944.1| PREDICTED: glucose dehydrogenase [FAD, quinone]-like [Nasonia vitripennis];>Cluster-8535.12297;orf1 len=666 frame:1 start:1 end:1998 gi|345497248|ref|XP_003427944.1| PREDICTED: glucose dehydrogenase [FAD, quinone]-like [Nasonia vitripennis]	2	1	1	2	74.736	0.0005777	45670000	1756500
>Cluster-8535.11355;orf1 len=622 frame:-3 start:2749 end:884 gi|817200736|ref|XP_012276094.1| PREDICTED: bifunctional purine biosynthesis protein PURH isoform X1 [Orussus abietinus]	1	2	2	5	68.083	0.0010939	62844000	1848400
>Cluster-8535.19758;orf1 len=951 frame:3 start:240 end:3092 gi|645020331|ref|XP_008207113.1| PREDICTED: hypoxia up-regulated protein 1 isoform X1 [Nasonia vitripennis]>gi|645020333|ref|XP_008207114.1| PREDICTED: hypoxia up-regulated protein 1 isoform X1 [Nasonia vitripennis]>gi|645020335|ref|XP_008207115.1| PREDICTED: hypoxia up-regulated protein 1 isoform X1 [Nasonia vitripennis]>gi|645020337|re…	3	6	6	8.1	106.8	2.0778e-25	124580000	2595400
>Cluster-8535.11400;orf1 len=1081 frame:-2 start:4513 end:1271 gi|766932851|ref|XP_011498665.1| PREDICTED: 2-oxoglutarate dehydrogenase, mitochondrial isoform X2 [Ceratosolen solmsi marchali];>Cluster-8535.17659;orf1 len=1040 frame:-3 start:4390 end:1271 gi|766932859|ref|XP_011498669.1| PREDICTED: 2-oxoglutarate dehydrogenase, mitochondrial isoform X6 [Ceratosolen solmsi marchali];>Cluster-8535.1…	8	18	18	22.5	121.4	2.2109e-66	1298100000	25962000
>Cluster-8535.2896;orf1 len=125 frame:2 start:104 end:478 gi|296481712|tpg|DAA23827.1| TPA: histone cluster 1, H4j-like [Bos taurus];>Cluster-8535.30233; len=106 start:1 end:316; minus strand;>Cluster-8535.11454;orf1 len=106 frame:3 start:57 end:374 gi|119389962|pdb|2HUE|C Chain C, Structure Of The H3-h4 Chaperone Asf1 Bound To Histones H3 And H4>gi|304446003|pdb|3NQJ|B Chain B, Crystal Structure…	12	5	5	41.9	13.877	4.1071e-20	1144700000	163530000
>Cluster-8535.11482;orf1 len=217 frame:-3 start:8258 end:7608 gi|766941221|ref|XP_011503235.1| PREDICTED: LOW QUALITY PROTEIN: dual specificity protein phosphatase 12-like [Ceratosolen solmsi marchali];>Cluster-8535.14193;orf1 len=217 frame:-1 start:8258 end:7608 gi|766941221|ref|XP_011503235.1| PREDICTED: LOW QUALITY PROTEIN: dual specificity protein phosphatase 12-like [Ceratosolen solmsi march…	6	1	1	7.9	24.105	2.3335e-05	0	0
>Cluster-8535.11505;orf1 len=724 frame:2 start:521 end:2692 gi|156554853|ref|XP_001606624.1| PREDICTED: peroxisomal multifunctional enzyme type 2-like [Nasonia vitripennis];>Cluster-8535.23609;orf1 len=190 frame:2 start:299 end:868 gi|156554853|ref|XP_001606624.1| PREDICTED: peroxisomal multifunctional enzyme type 2-like [Nasonia vitripennis]	2	9	9	14.8	79.497	3.3575e-25	553230000	12866000
>Cluster-8535.11509;orf1 len=225 frame:-1 start:2149 end:1475 gi|156538815|ref|XP_001608268.1| PREDICTED: protein D3-like [Nasonia vitripennis]>gi|645021476|ref|XP_008207564.1| PREDICTED: protein D3-like [Nasonia vitripennis]	1	4	4	30.8	24.872	1.826e-32	770080000	85565000
>Cluster-8535.11535;orf1 len=426 frame:1 start:43 end:1320 gi|645018197|ref|XP_008205889.1| PREDICTED: uncharacterized protein LOC100680003 [Nasonia vitripennis]	1	3	3	7.8	47.898	1.9853e-05	58693000	2257400
>Cluster-8535.11564;orf1 len=280 frame:1 start:175 end:1014 gi|156541512|ref|XP_001599916.1| PREDICTED: L-selectin [Nasonia vitripennis]	1	2	2	9	32.031	1.6502e-05	26500000	1892900
>Cluster-8535.11633;orf1 len=117 frame:2 start:2 end:352 gi|645017418|ref|XP_008205579.1| PREDICTED: transcriptional adapter 2B-like [Nasonia vitripennis]	1	3	3	28.4	13.161	1.5034e-23	276520000	39503000
>Cluster-8535.11685;orf1 len=627 frame:1 start:292 end:2172 gi|644999955|ref|XP_008215783.1| PREDICTED: LOW QUALITY PROTEIN: trehalase-like [Nasonia vitripennis]	1	23	23	40.4	72.414	1.2367e-186	26846000000	866000000
>Cluster-8535.11687;orf1 len=309 frame:-3 start:1287 end:361 gi|288856315|ref|NP_001165810.1| cytochrome b-c1 complex subunit Rieske, mitochondrial [Nasonia vitripennis]	1	1	1	3.2	33.468	0.0023649	29396000	1959700
>Cluster-8535.11733;orf1 len=770 frame:1 start:3604 end:5913 gi|766928854|ref|XP_011496492.1| PREDICTED: trifunctional enzyme subunit alpha, mitochondrial [Ceratosolen solmsi marchali];>Cluster-8535.11734;orf1 len=770 frame:1 start:3508 end:5817 gi|766928854|ref|XP_011496492.1| PREDICTED: trifunctional enzyme subunit alpha, mitochondrial [Ceratosolen solmsi marchali]	2	4	4	6.6	83.239	1.1265e-17	122650000	2787400
>Cluster-8535.11753;orf2 len=344 frame:2 start:47 end:1078 gi|156550600|ref|XP_001604166.1| PREDICTED: inorganic pyrophosphatase [Nasonia vitripennis]	1	2	2	7.6	38.94	0.00024859	38381000	2020100
>Cluster-8535.118; len=133 start:29 end:426; minus strand;>Cluster-8535.29446;orf1 len=128 frame:-2 start:419 end:36 gi|548528705|ref|XP_005700136.1| PREDICTED: 60S acidic ribosomal protein P2 [Capra hircus]>gi|803331706|ref|XP_012023966.1| PREDICTED: 60S acidic ribosomal protein P2 [Ovis aries musimon]	2	1	1	9.1	14.054	0.00035076	28034000	4004900
>Cluster-8535.11940;orf1 len=279 frame:1 start:1 end:837 gi|289330648|ref|NP_001166090.1| serine protease 73 precursor [Nasonia vitripennis];>Cluster-8535.8231;orf2 len=222 frame:2 start:149 end:814 gi|289330648|ref|NP_001166090.1| serine protease 73 precursor [Nasonia vitripennis]	2	2	2	7.9	31.34	0.0012666	16536000	1272000
>Cluster-8535.11995;orf1 len=228 frame:3 start:114 end:797 gi|156546926|ref|XP_001603243.1| PREDICTED: protein D2-like isoform X1 [Nasonia vitripennis];>Cluster-8535.11994;orf1 len=207 frame:3 start:249 end:869 gi|156546926|ref|XP_001603243.1| PREDICTED: protein D2-like isoform X1 [Nasonia vitripennis];>Cluster-8535.11996;orf1 len=204 frame:3 start:69 end:680 gi|156546926|ref|XP_001603243.1| PRED…	3	4	4	22.5	25.381	1.3482e-35	122440000	11131000
>Cluster-8535.11999;orf1 len=394 frame:-2 start:5074 end:3893 gi|645016853|ref|XP_008211658.1| PREDICTED: V-type proton ATPase subunit C isoform X2 [Nasonia vitripennis];>Cluster-8535.13039;orf1 len=394 frame:-2 start:5104 end:3923 gi|645016853|ref|XP_008211658.1| PREDICTED: V-type proton ATPase subunit C isoform X2 [Nasonia vitripennis];>Cluster-8535.13040;orf1 len=394 frame:-2 start:5142 end:39…	4	5	5	14.2	45.335	8.1109e-17	181090000	7243800
>Cluster-8535.12067;orf1 len=491 frame:3 start:438 end:1910 gi|322784394|gb|EFZ11365.1| hypothetical protein SINV_08802, partial [Solenopsis invicta]	1	7	7	20.6	53.314	2.4544e-41	584570000	22484000
>Cluster-8535.12108;orf1 len=203 frame:2 start:179 end:787 gi|156555680|ref|XP_001601418.1| PREDICTED: ecdysteroid-regulated 16 kDa protein [Nasonia vitripennis]	1	2	2	12.4	22.569	0.0001983	162290000	14753000
>Cluster-8535.12135; len=103 start:1390 end:1700; minus strand	1	4	4	48	11.222	1.0514e-31	7643200000	955400000
>Cluster-8535.1219;orf1 len=187 frame:2 start:2 end:562 gi|119581485|gb|EAW61081.1| peptidylprolyl isomerase A-like, isoform CRA_c [Homo sapiens];>Cluster-20687.0; len=96 start:182 end:469; minus strand;>Cluster-20687.1;orf1 len=92 frame:-1 start:276 end:1 gi|261490820|ref|NP_001159798.1| peptidyl-prolyl cis-trans isomerase A [Gallus gallus]>gi|260103640|gb|ACX31829.1| cyclophilin A [Gallus gallu…	3	5	5	37.6	20.228	6.4967e-17	459820000	41802000
>Cluster-8535.1221; len=357 start:165 end:1235; minus strand	1	1	1	3.7	37.49	0.012738	13683000	804850
>Cluster-8535.12219;orf1 len=521 frame:1 start:55 end:1617 gi|645034851|ref|XP_008201993.1| PREDICTED: uncharacterized protein LOC100122591 [Nasonia vitripennis];>Cluster-8535.20904;orf2 len=520 frame:1 start:55 end:1614 gi|815824928|ref|XP_012233823.1| PREDICTED: uncharacterized protein LOC105678776 isoform X1 [Linepithema humile]>gi|815824930|ref|XP_012233824.1| PREDICTED: uncharacterized prote…	2	2	2	4.4	58.727	3.4992e-06	14750000	776300
>Cluster-8535.12239;orf1 len=799 frame:3 start:3 end:2399 gi|645018230|ref|XP_008205904.1| PREDICTED: dipeptidyl peptidase 3 isoform X1 [Nasonia vitripennis];>Cluster-8535.13617;orf1 len=780 frame:2 start:32 end:2371 gi|645018230|ref|XP_008205904.1| PREDICTED: dipeptidyl peptidase 3 isoform X1 [Nasonia vitripennis]	2	1	1	1.6	90.574	4.8317e-05	0	0
>Cluster-8535.12862;orf1 len=288 frame:1 start:4 end:867 gi|645038118|ref|XP_008217499.1| PREDICTED: microtubule-associated protein RP/EB family member 1 isoform X1 [Nasonia vitripennis]>gi|645038121|ref|XP_008217500.1| PREDICTED: microtubule-associated protein RP/EB family member 1 isoform X1 [Nasonia vitripennis];>Cluster-8535.18882;orf1 len=282 frame:1 start:4 end:849 gi|645038130|ref|XP_00821…	4	1	1	2.8	32.009	0.005409	1090700000	72716000
>Cluster-8535.12286;orf1 len=543 frame:-1 start:4692 end:3064 gi|645025648|ref|XP_008202130.1| PREDICTED: thioredoxin reductase 2, mitochondrial isoform X1 [Nasonia vitripennis];>Cluster-8535.21058;orf1 len=543 frame:-2 start:4692 end:3064 gi|645025648|ref|XP_008202130.1| PREDICTED: thioredoxin reductase 2, mitochondrial isoform X1 [Nasonia vitripennis];>Cluster-8535.15658;orf1 len=497 frame:-1 s…	3	8	8	17.5	59.248	7.7976e-21	368390000	16017000
>Cluster-8535.12311; len=145 start:680 end:1113; minus strand;>Cluster-8535.20210;orf1 len=135 frame:2 start:1310 end:1714 gi|766932863|ref|XP_011498672.1| PREDICTED: PDZ and LIM domain protein 3 isoform X1 [Ceratosolen solmsi marchali]	2	1	1	10.3	16.545	1.1479e-16	77345000	8593900
>Cluster-8535.1235; len=82 start:324 end:569; minus strand	1	1	1	9.8	9.0673	0.003081	30827000	5137800
>Cluster-8535.20772;orf1 len=1967 frame:1 start:520 end:6420 gi|345489382|ref|XP_003426125.1| PREDICTED: protein 4.1 homolog isoform X4 [Nasonia vitripennis];>Cluster-8535.12373;orf1 len=1932 frame:1 start:520 end:6315 gi|345489382|ref|XP_003426125.1| PREDICTED: protein 4.1 homolog isoform X4 [Nasonia vitripennis];>Cluster-8535.19815;orf2 len=1857 frame:1 start:520 end:6090 gi|645017262|ref|XP_00…	5	6	6	5	215.03	5.8804e-127	99743000	932170
>Cluster-8535.12379;orf1 len=142 frame:2 start:1595 end:2020 gi|345480432|ref|XP_001601651.2| PREDICTED: DNA-directed RNA polymerase I subunit RPA49 [Nasonia vitripennis]	1	1	1	11.3	16.215	0.012247	23917000	2657400
>Cluster-8535.1241;orf1 len=345 frame:1 start:1 end:1035 gi|471361387|ref|XP_004371259.1| PREDICTED: nucleophosmin isoform X1 [Trichechus manatus latirostris];>Cluster-25898.0;orf1 len=194 frame:3 start:3 end:584 gi|543378835|ref|XP_005532617.1| PREDICTED: nucleophosmin isoform X1 [Pseudopodoces humilis]	2	3	3	15.4	38.116	1.4845e-47	139960000	8747500
>Cluster-8535.12443;orf1 len=271 frame:3 start:129 end:941 gi|345490227|ref|XP_001604944.2| PREDICTED: dehydrogenase/reductase SDR family member 11-like [Nasonia vitripennis]	1	1	1	3.3	29.964	0.0076901	16977000	1543400
>Cluster-8535.12463;orf1 len=306 frame:3 start:444 end:1361 gi|156546008|ref|XP_001607850.1| PREDICTED: circadian clock-controlled protein-like [Nasonia vitripennis]	1	1	1	3.9	35.256	0.00030597	31623000	1976500
>Cluster-8535.12493;orf1 len=290 frame:-2 start:2065 end:1196 gi|238535370|gb|ACR44221.1| heat shock protein 40 [Pteromalus puparum]	1	4	4	18.3	31.102	1.0056e-20	102950000	6863400
>Cluster-8535.12539;orf1 len=526 frame:-1 start:6878 end:5301 gi|766918711|ref|XP_011499886.1| PREDICTED: solute carrier family 25 member 44 [Ceratosolen solmsi marchali];>Cluster-8535.18893;orf2 len=526 frame:-1 start:6952 end:5375 gi|345480913|ref|XP_001606637.2| PREDICTED: TOM1-like protein 2 [Nasonia vitripennis]>gi|645010915|ref|XP_008213629.1| PREDICTED: TOM1-like protein 2 [Nasonia vitripe…	5	1	1	2.5	56.301	0.00034185	11278000	469900
>Cluster-8535.12555; len=746 start:1 end:2239; minus strand;>Cluster-8535.15123;orf1 len=708 frame:1 start:1 end:2124 gi|345493261|ref|XP_001604126.2| PREDICTED: uncharacterized protein LOC100120484 [Nasonia vitripennis];>Cluster-8535.15124;orf1 len=708 frame:1 start:1 end:2124 gi|345493261|ref|XP_001604126.2| PREDICTED: uncharacterized protein LOC100120484 [Nasonia vitripennis];>Cluster-8535.160…	4	1	1	1.9	81.808	0.0028294	0	0
>Cluster-8535.12561;orf1 len=1787 frame:1 start:589 end:5949 gi|780613661|ref|XP_011690619.1| PREDICTED: ankyrin-3-like isoform X13 [Wasmannia auropunctata];>Cluster-8535.16590;orf1 len=1763 frame:1 start:589 end:5877 gi|645006304|ref|XP_008204417.1| PREDICTED: microtubule-associated protein futsch-like [Nasonia vitripennis];>Cluster-8535.18151;orf2 len=1752 frame:1 start:595 end:5850 gi|57230763…	5	9	1	6.3	194.55	3.1196e-22	0	0
>Cluster-8535.12597;orf1 len=965 frame:1 start:106 end:3000 gi|645034901|ref|XP_003425302.2| PREDICTED: uncharacterized protein DDB_G0287625-like [Nasonia vitripennis];>Cluster-8535.12826;orf1 len=930 frame:1 start:106 end:2895 gi|645034901|ref|XP_003425302.2| PREDICTED: uncharacterized protein DDB_G0287625-like [Nasonia vitripennis]	2	1	1	1.1	110.34	0.016605	131560000	2579500
>Cluster-8535.12603;orf1 len=161 frame:1 start:106 end:588 gi|156554296|ref|XP_001602465.1| PREDICTED: 40S ribosomal protein S14 [Nasonia vitripennis]>gi|645027100|ref|XP_008208988.1| PREDICTED: 40S ribosomal protein S14 [Nasonia vitripennis]>gi|152940797|gb|ABS44863.1| putative ribosomal protein S14 [Oryza sativa Japonica Group];>Cluster-13642.0;orf1 len=146 frame:2 start:2 end:439 gi|594030554|…	8	4	4	28.8	17.355	4.0396e-13	344510000	49215000
>Cluster-8535.12666;orf1 len=233 frame:2 start:215 end:913 gi|156544942|ref|XP_001607380.1| PREDICTED: superoxide dismutase [Mn], mitochondrial [Nasonia vitripennis]	1	4	4	22	25.873	2.44e-19	261630000	21802000
>Cluster-8535.12681;orf1 len=523 frame:2 start:500 end:2068 gi|345495697|ref|XP_003427555.1| PREDICTED: UTP--glucose-1-phosphate uridylyltransferase isoform X1 [Nasonia vitripennis];>Cluster-8535.16449;orf1 len=518 frame:2 start:341 end:1894 gi|156543768|ref|XP_001606199.1| PREDICTED: UTP--glucose-1-phosphate uridylyltransferase isoform X2 [Nasonia vitripennis]	2	3	3	8.4	58.902	1.9809e-18	130290000	3832100
>Cluster-8535.12717;orf1 len=586 frame:2 start:2249 end:4006 gi|645034412|ref|XP_008201883.1| PREDICTED: glucosylceramidase-like [Nasonia vitripennis];>Cluster-8535.15897;orf2 len=586 frame:1 start:1846 end:3603 gi|645034412|ref|XP_008201883.1| PREDICTED: glucosylceramidase-like [Nasonia vitripennis];>Cluster-8535.12716;orf2 len=331 frame:2 start:2249 end:3241 gi|645034412|ref|XP_008201883.1| PRE…	4	2	2	4.4	64.193	1.2214e-07	32670000	1485000
>Cluster-8535.12726;orf1 len=127 frame:3 start:165 end:545 gi|645015177|ref|XP_008206352.1| PREDICTED: putative acyl-CoA-binding protein [Nasonia vitripennis]	1	1	1	11.9	14.612	0.00054622	45531000	4553100
>Cluster-8535.1281;orf1 len=314 frame:1 start:58 end:999 gi|556732746|ref|XP_005962035.1| PREDICTED: 60S acidic ribosomal protein P0 isoform X1 [Pantholops hodgsonii]	1	1	1	7	33.933	0.00022996	19523000	1501700
>Cluster-8535.1284;orf1 len=772 frame:-1 start:2654 end:339 gi|20127408|ref|NP_000173.2| trifunctional enzyme subunit alpha, mitochondrial precursor [Homo sapiens]>gi|20141376|sp|P40939.2|ECHA_HUMAN RecName: Full=Trifunctional enzyme subunit alpha, mitochondrial; AltName: Full=78 kDa gastrin-binding protein; AltName: Full=TP-alpha; Includes: RecName: Full=Long-chain enoyl-CoA hydratase; Includes:…	1	1	1	1.8	83.922	5.3592e-07	0	0
>Cluster-8535.12852;orf1 len=91 frame:3 start:3 end:275 gi|645001088|ref|XP_008209376.1| PREDICTED: uncharacterized protein LOC100115922 isoform X6 [Nasonia vitripennis];>Cluster-8535.13143;orf1 len=91 frame:3 start:3 end:275 gi|645001080|ref|XP_008209372.1| PREDICTED: uncharacterized protein LOC100115922 isoform X2 [Nasonia vitripennis];>Cluster-8535.7732;orf1 len=95 frame:1 start:232 end:516 gi…	3	2	2	21.1	9.6995	1.3538e-05	184490000	26356000
>Cluster-8535.15729;orf1 len=2404 frame:-1 start:18724 end:11513 gi|645020343|ref|XP_008207120.1| PREDICTED: spectrin beta chain isoform X1 [Nasonia vitripennis];>Cluster-8535.15583;orf1 len=2385 frame:-1 start:18244 end:11090 gi|645020347|ref|XP_008207122.1| PREDICTED: spectrin beta chain isoform X3 [Nasonia vitripennis];>Cluster-8535.12858;orf1 len=2304 frame:-1 start:18085 end:11174 gi|6450203…	8	1	1	0.6	278.43	8.0029e-21	102840000	714140
>Cluster-8535.12870;orf1 len=806 frame:3 start:1218 end:3635 gi|345486620|ref|XP_001605497.2| PREDICTED: transitional endoplasmic reticulum ATPase TER94 [Nasonia vitripennis];>Cluster-5608.1; len=398 start:1 end:1192; minus strand;>Cluster-8535.15619;orf1 len=786 frame:-2 start:2536 end:179 gi|229576829|ref|NP_001153385.1| vesicle-fusing ATPase [Nasonia vitripennis]	3	3	3	4.2	89.44	1.7207e-08	28591000	621550
>Cluster-8535.16623;orf1 len=1251 frame:-2 start:7468 end:3716 gi|766919803|ref|XP_011504342.1| PREDICTED: integrator complex subunit 11 [Ceratosolen solmsi marchali];>Cluster-8535.17880;orf1 len=1251 frame:-2 start:7468 end:3716 gi|645033205|ref|XP_008214920.1| PREDICTED: kinectin isoform X5 [Nasonia vitripennis];>Cluster-8535.17882;orf2 len=1189 frame:-2 start:7282 end:3716 gi|645033183|ref|XP_…	9	1	1	1	142.08	1.0285e-05	10704000	157420
>Cluster-8535.13032;orf1 len=658 frame:-3 start:2742 end:769 gi|156547889|ref|XP_001608044.1| PREDICTED: heat shock 70 kDa protein cognate 4-like [Nasonia vitripennis]>gi|645034761|ref|XP_008201972.1| PREDICTED: heat shock 70 kDa protein cognate 4-like [Nasonia vitripennis];>Cluster-8535.11506;orf1 len=199 frame:-3 start:597 end:1 gi|645000995|ref|XP_001599773.3| PREDICTED: heat shock protein 68-…	6	10	5	20.5	72.065	1.8053e-59	834750000	24551000
>Cluster-8535.13073;orf1 len=720 frame:3 start:870 end:3029 gi|645040960|ref|XP_001599966.3| PREDICTED: probable peroxisomal acyl-coenzyme A oxidase 1 [Nasonia vitripennis]>gi|645040963|ref|XP_008213186.1| PREDICTED: probable peroxisomal acyl-coenzyme A oxidase 1 [Nasonia vitripennis]>gi|645040965|ref|XP_008213187.1| PREDICTED: probable peroxisomal acyl-coenzyme A oxidase 1 [Nasonia vitripennis];…	3	3	3	6.5	80.863	0.00011777	113750000	3074300
>Cluster-8535.13099;orf1 len=276 frame:-3 start:830 end:3 gi|826480763|ref|XP_012538058.1| PREDICTED: four and a half LIM domains protein 2 isoform X15 [Monomorium pharaonis]	1	8	8	35.5	31.362	6.5674e-132	1818900000	121260000
>Cluster-8535.13200;orf1 len=231 frame:3 start:81 end:773 gi|288856254|ref|NP_001165782.1| NADH dehydrogenase [ubiquinone] iron-sulfur protein 4, mitochondrial [Nasonia vitripennis]	1	8	8	50	26.163	1.8308e-45	312150000	26012000
>Cluster-8535.13207;orf1 len=541 frame:-1 start:4002 end:2380 gi|345490491|ref|XP_003426390.1| PREDICTED: T-complex protein 1 subunit beta [Nasonia vitripennis];>Cluster-8535.16400;orf1 len=541 frame:-1 start:4560 end:2938 gi|345490491|ref|XP_003426390.1| PREDICTED: T-complex protein 1 subunit beta [Nasonia vitripennis];>Cluster-3038.0;orf1 len=555 frame:-3 start:1902 end:238 gi|640816047|ref|XP_…	3	2	2	4.4	58.491	1.3308e-06	29046000	880180
>Cluster-8535.13278;orf1 len=1569 frame:2 start:503 end:5209 gi|645034685|ref|XP_008201955.1| PREDICTED: filamin-A isoform X1 [Nasonia vitripennis];>Cluster-8535.17071;orf1 len=1564 frame:2 start:503 end:5194 gi|345485608|ref|XP_001607090.2| PREDICTED: filamin-A isoform X2 [Nasonia vitripennis]	2	22	1	24.4	169.44	9.4244e-142	1605100000	19339000
>Cluster-8535.18268;orf1 len=443 frame:-2 start:4238 end:2910 gi|345493790|ref|XP_001605691.2| PREDICTED: probable Xaa-Pro aminopeptidase 3 isoform X1 [Nasonia vitripennis]>gi|645001932|ref|XP_008209748.1| PREDICTED: probable Xaa-Pro aminopeptidase 3 isoform X1 [Nasonia vitripennis]>gi|645001934|ref|XP_008209749.1| PREDICTED: probable Xaa-Pro aminopeptidase 3 isoform X1 [Nasonia vitripennis];>Clu…	6	2	2	5.7	48.877	1.6465e-05	16496000	687330
>Cluster-8535.13362;orf2 len=271 frame:-1 start:2085 end:1273 gi|156542911|ref|XP_001601321.1| PREDICTED: proteasome subunit beta type-4 isoform X1 [Nasonia vitripennis]	1	2	2	13.3	30.25	3.8324e-05	14067000	1172200
>Cluster-8535.13386;orf1 len=708 frame:2 start:413 end:2536 gi|805802674|ref|XP_012145014.1| PREDICTED: succinate dehydrogenase [ubiquinone] flavoprotein subunit, mitochondrial [Megachile rotundata]	1	4	4	11.5	77.653	1.955e-23	110860000	2917400
>Cluster-8535.13533;orf1 len=411 frame:-3 start:4788 end:3556 gi|156542873|ref|XP_001600632.1| PREDICTED: spermine synthase [Nasonia vitripennis]	1	1	1	3.4	46.039	2.7652e-06	11932000	497160
>Cluster-8535.13551;orf2 len=476 frame:-3 start:3590 end:2163 gi|156550779|ref|XP_001606375.1| PREDICTED: trifunctional enzyme subunit beta, mitochondrial [Nasonia vitripennis]	1	2	2	4.6	51.627	0.00052377	44106000	2004800
>Cluster-8535.13630;orf1 len=169 frame:1 start:196 end:702 gi|156549881|ref|XP_001605642.1| PREDICTED: 60S ribosomal protein L12 [Nasonia vitripennis];>Cluster-8535.17061;orf1 len=169 frame:1 start:196 end:702 gi|156549881|ref|XP_001605642.1| PREDICTED: 60S ribosomal protein L12 [Nasonia vitripennis]	2	1	1	8.9	18.13	0.0076016	53312000	5331200
>Cluster-8535.13660;orf1 len=4236 frame:3 start:3 end:12710 gi|644992712|ref|XP_008202978.1| PREDICTED: twitchin [Nasonia vitripennis];>Cluster-8535.20386;orf1 len=3348 frame:3 start:126 end:10169 gi|644992712|ref|XP_008202978.1| PREDICTED: twitchin [Nasonia vitripennis]	2	26	26	9.4	471.52	1.8509e-151	894990000	3960100
>Cluster-8535.13724;orf1 len=431 frame:2 start:2 end:1294 gi|644992648|ref|XP_008202956.1| PREDICTED: glycerol-3-phosphate dehydrogenase [NAD(+)], cytoplasmic isoform X3 [Nasonia vitripennis];>Cluster-8535.19697;orf1 len=89 frame:2 start:2 end:268 gi|156549032|ref|XP_001607937.1| PREDICTED: glycerol-3-phosphate dehydrogenase [NAD(+)], cytoplasmic isoform X2 [Nasonia vitripennis]	2	6	6	16.7	47.118	4.3655e-15	176050000	6771000
>Cluster-8535.13725;orf1 len=149 frame:3 start:3 end:449 gi|156545926|ref|XP_001600607.1| PREDICTED: uncharacterized protein LOC100113557 [Nasonia vitripennis]>gi|355389891|emb|CCD17778.1| putative odorant binding protein 9 [Nasonia vitripennis]	1	1	1	6.8	16.536	0.0061934	0	0
>Cluster-8535.8269;orf1 len=145 frame:-2 start:521 end:87 gi|345478768|ref|XP_003423804.1| PREDICTED: probable salivary secreted peptide [Nasonia vitripennis];>Cluster-8535.13847;orf1 len=131 frame:-3 start:479 end:87 gi|345478768|ref|XP_003423804.1| PREDICTED: probable salivary secreted peptide [Nasonia vitripennis]	2	5	5	34	15.956	1.4247e-41	3241300000	463040000
>Cluster-8535.13857;orf1 len=337 frame:3 start:1380 end:2390 gi|645022667|ref|XP_008217468.1| PREDICTED: electron transfer flavoprotein subunit alpha, mitochondrial [Nasonia vitripennis]>gi|645022670|ref|XP_008217469.1| PREDICTED: electron transfer flavoprotein subunit alpha, mitochondrial [Nasonia vitripennis]	1	4	4	17	35.384	2.2546e-12	153030000	6653600
>Cluster-8535.13862;orf1 len=118 frame:2 start:86 end:439 gi|665814655|ref|XP_008555948.1| PREDICTED: 60S ribosomal protein L30 isoform X1 [Microplitis demolitor];>Cluster-11720.0; len=104 start:1 end:311; minus strand	2	2	2	23.9	12.908	1.4345e-07	70383000	11730000
>Cluster-8535.13864;orf1 len=475 frame:-3 start:1425 end:1 gi|156550877|ref|XP_001602184.1| PREDICTED: alpha-amylase-like [Nasonia vitripennis]>gi|645013646|ref|XP_008205202.1| PREDICTED: alpha-amylase-like [Nasonia vitripennis]>gi|645013648|ref|XP_008205203.1| PREDICTED: alpha-amylase-like [Nasonia vitripennis];>Cluster-8535.25725;orf1 len=132 frame:3 start:1272 end:1667 gi|766935345|ref|XP_0115…	3	14	14	44.2	53.377	4.7535e-217	10259000000	427450000
>Cluster-8535.13881;orf1 len=566 frame:-2 start:2685 end:988 gi|645016372|ref|XP_008211453.1| PREDICTED: adenylyl cyclase-associated protein 1 [Nasonia vitripennis]	1	1	1	1.8	62.337	0.0068066	36205000	1167900
>Cluster-8535.13934;orf1 len=404 frame:1 start:2227 end:3438 gi|345487725|ref|XP_003425745.1| PREDICTED: DNA ligase 1-like [Nasonia vitripennis]	1	2	2	6.9	45.178	0.00054459	79870000	4698200
>Cluster-8535.15568;orf1 len=378 frame:-2 start:2344 end:1211 gi|645030892|ref|XP_008209994.1| PREDICTED: RNA-binding protein squid isoform X4 [Nasonia vitripennis];>Cluster-8535.15563;orf1 len=357 frame:-3 start:2467 end:1397 gi|766921900|ref|XP_011505488.1| PREDICTED: RNA-binding protein squid [Ceratosolen solmsi marchali];>Cluster-8535.14062;orf1 len=355 frame:-2 start:2461 end:1397 gi|6450308…	6	3	3	11.7	40.913	4.9514e-23	41555000	2597200
>Cluster-8535.1400;orf1 len=662 frame:-2 start:2339 end:354 gi|594695018|ref|XP_007194739.1| PREDICTED: 78 kDa glucose-regulated protein isoform X1 [Balaenoptera acutorostrata scammoni]>gi|594695020|ref|XP_007194740.1| PREDICTED: 78 kDa glucose-regulated protein isoform X2 [Balaenoptera acutorostrata scammoni];>Cluster-25530.0; len=198 start:1 end:592; minus strand;>Cluster-11686.0; len=96 start:…	3	12	8	22.7	72.98	3.419e-55	776340000	25878000
>Cluster-8535.14015;orf1 len=121 frame:-2 start:683 end:321 gi|156549559|ref|XP_001606355.1| PREDICTED: uncharacterized protein LOC100118686 [Nasonia vitripennis]>gi|355390005|emb|CCD17835.1| putative odorant binding protein 66 [Nasonia vitripennis]	1	1	1	11.7	13.181	0.00010464	63896000	7986900
>Cluster-8535.14030;orf1 len=262 frame:2 start:275 end:1060 gi|156545000|ref|XP_001608114.1| PREDICTED: NECAP-like protein CG9132 [Nasonia vitripennis]>gi|645037156|ref|XP_008217186.1| PREDICTED: NECAP-like protein CG9132 [Nasonia vitripennis]	1	1	1	4.2	28.952	0.012235	6356300	488940
>Cluster-8535.14035; len=260 start:1 end:778; minus strand;>Cluster-12060.0; len=204 start:1 end:610; minus strand	2	13	12	42.7	29.452	3.0115e-107	22475000000	1498300000
>Cluster-8535.1404;orf1 len=708 frame:3 start:3 end:2126 gi|795148254|ref|XP_011837957.1| PREDICTED: heat shock protein 75 kDa, mitochondrial isoform X1 [Mandrillus leucophaeus];>Cluster-8535.19024;orf1 len=708 frame:1 start:7057 end:9180 gi|156553644|ref|XP_001600436.1| PREDICTED: heat shock protein 75 kDa, mitochondrial [Nasonia vitripennis]	2	1	1	1.7	80.516	0.011639	0	0
>Cluster-8535.1405;orf2 len=248 frame:3 start:3 end:746 gi|640805016|ref|XP_008058923.1| PREDICTED: uncharacterized protein LOC103263058 [Tarsius syrichta]	1	1	1	7.7	27.624	0.0060534	0	0
>Cluster-8535.14057;orf1 len=415 frame:1 start:517 end:1761 gi|283046759|ref|NP_001164327.1| fructose-bisphosphate aldolase isoform B [Nasonia vitripennis];>Cluster-8535.16726;orf1 len=414 frame:1 start:517 end:1758 gi|283046761|ref|NP_001164328.1| fructose-bisphosphate aldolase isoform A [Nasonia vitripennis]	2	17	17	57.5	44.979	4.3274e-208	3768800000	150750000
>Cluster-8535.14076;orf1 len=255 frame:3 start:165 end:929 gi|345483163|ref|XP_001607558.2| PREDICTED: tropinone reductase 2-like [Nasonia vitripennis];>Cluster-8535.20731;orf1 len=255 frame:2 start:272 end:1036 gi|345483163|ref|XP_001607558.2| PREDICTED: tropinone reductase 2-like [Nasonia vitripennis]	2	2	2	9.4	27.097	7.1381e-06	73471000	4321800
>Cluster-8535.14077;orf2 len=426 frame:3 start:3351 end:4628 gi|645027660|ref|XP_008204114.1| PREDICTED: transmembrane protein 192 isoform X1 [Nasonia vitripennis]	1	2	2	5.6	48.19	2.1113e-07	126100000	12610000
>Cluster-8535.183;orf1 len=1888 frame:3 start:3 end:5666 gi|12667788|ref|NP_002464.1| myosin-9 [Homo sapiens]>gi|768024950|ref|XP_011528499.1| PREDICTED: myosin-9 isoform X1 [Homo sapiens]>gi|6166599|sp|P35579.4|MYH9_HUMAN RecName: Full=Myosin-9; AltName: Full=Cellular myosin heavy chain, type A; AltName: Full=Myosin heavy chain 9; AltName: Full=Myosin heavy chain, non-muscle IIa; AltName: Full=N…	2	4	4	2.8	218.38	1.3526e-14	48637000	491280
>Cluster-8535.14120;orf1 len=190 frame:1 start:1 end:570 gi|156551682|ref|XP_001601652.1| PREDICTED: uncharacterized protein LOC100117399 [Nasonia vitripennis]	1	1	1	5.8	22.064	0.0020146	33016000	2539700
>Cluster-8535.14131;orf1 len=862 frame:-1 start:3975 end:1390 gi|759075256|ref|XP_011347332.1| PREDICTED: glycogen phosphorylase [Cerapachys biroi]>gi|607354331|gb|EZA48982.1| Glycogen phosphorylase [Cerapachys biroi];>Cluster-8811.2;orf1 len=876 frame:2 start:2 end:2629 gi|852780732|ref|XP_012882564.1| PREDICTED: glycogen phosphorylase, brain form [Dipodomys ordii];>Cluster-8811.0;orf1 len=714 f…	4	11	11	16.3	99.144	6.9753e-91	409240000	7870000
>Cluster-8535.14140;orf1 len=213 frame:1 start:97 end:735 gi|645034797|ref|XP_008201977.1| PREDICTED: myophilin [Nasonia vitripennis]	1	4	4	22.2	23.878	1.119e-15	736530000	49102000
>Cluster-8535.14156;orf1 len=384 frame:-2 start:1239 end:88 gi|820857060|ref|XP_012345672.1| PREDICTED: actin, clone 205-like isoform X1 [Apis florea];>Cluster-8535.5317; len=129 start:77 end:463; minus strand;>Cluster-8535.27008; len=105 start:1 end:313; minus strand;>Cluster-19739.0; len=289 start:186 end:1051; minus strand;>Cluster-12928.0; len=89 start:1 end:267; minus strand;>Cluster-23872.0…	19	18	0	59	42.62	2.5954e-241	809740000	40487000
>Cluster-8535.14159;orf1 len=225 frame:1 start:1 end:675 gi|345491892|ref|XP_003426732.1| PREDICTED: uncharacterized protein LOC100115149 [Nasonia vitripennis]	1	4	4	24.1	24.591	1.1146e-147	212730000	21273000
>Cluster-8535.14372;orf1 len=1580 frame:-2 start:5174 end:435 gi|645025755|ref|XP_008202180.1| PREDICTED: protein hu-li tai shao isoform X5 [Nasonia vitripennis];>Cluster-8535.14165;orf1 len=1575 frame:-2 start:5159 end:435 gi|645025753|ref|XP_008202179.1| PREDICTED: protein hu-li tai shao isoform X4 [Nasonia vitripennis];>Cluster-8535.18476;orf1 len=824 frame:-2 start:2799 end:328 gi|645025755|r…	8	7	7	5.6	178.63	1.5944e-20	205120000	2564000
>Cluster-8535.14211;orf1 len=687 frame:2 start:89 end:2149 gi|156551261|ref|XP_001600744.1| PREDICTED: sphingomyelin phosphodiesterase-like [Nasonia vitripennis]>gi|645007137|ref|XP_008216138.1| PREDICTED: sphingomyelin phosphodiesterase-like [Nasonia vitripennis]>gi|645007140|ref|XP_008216139.1| PREDICTED: sphingomyelin phosphodiesterase-like [Nasonia vitripennis]	1	15	15	28	77.978	6.9573e-80	1967200000	51770000
>Cluster-8535.14238;orf1 len=330 frame:3 start:6 end:995 gi|817191239|ref|XP_012271010.1| PREDICTED: probable enoyl-CoA hydratase, mitochondrial [Orussus abietinus]>gi|817191241|ref|XP_012271011.1| PREDICTED: probable enoyl-CoA hydratase, mitochondrial [Orussus abietinus]	1	6	6	27.1	35.389	3.9256e-26	361870000	22617000
>Cluster-8535.14242;orf1 len=492 frame:1 start:166 end:1641 gi|766937842|ref|XP_011501395.1| PREDICTED: cytosolic non-specific dipeptidase [Ceratosolen solmsi marchali];>Cluster-8535.14243;orf2 len=492 frame:1 start:235 end:1710 gi|156555352|ref|XP_001604815.1| PREDICTED: alpha-L-fucosidase-like [Nasonia vitripennis];>Cluster-8535.14244;orf2 len=492 frame:1 start:592 end:2067 gi|766937842|ref|XP_…	4	7	7	21.8	55.173	4.1522e-32	350450000	12516000
>Cluster-8535.14242;orf2 len=481 frame:-3 start:3648 end:2206 gi|766937842|ref|XP_011501395.1| PREDICTED: cytosolic non-specific dipeptidase [Ceratosolen solmsi marchali];>Cluster-8535.14243;orf1 len=481 frame:-3 start:3717 end:2275 gi|156555352|ref|XP_001604815.1| PREDICTED: alpha-L-fucosidase-like [Nasonia vitripennis];>Cluster-8535.14244;orf1 len=481 frame:-3 start:4074 end:2632 gi|766937842|r…	4	2	2	5.4	56.324	1.086e-10	0	0
>Cluster-8535.14312;orf1 len=121 frame:-1 start:601 end:239 gi|645017853|ref|XP_008215767.1| PREDICTED: V-type proton ATPase subunit G [Nasonia vitripennis]	1	1	1	16.7	14.069	4.5308e-09	92808000	18562000
>Cluster-8535.14317;orf1 len=501 frame:2 start:3815 end:5317 gi|288856265|ref|NP_001165788.1| NADH dehydrogenase [ubiquinone] flavoprotein 1, mitochondrial [Nasonia vitripennis];>Cluster-5532.0; len=305 start:1 end:914; minus strand	2	3	3	8.2	55.398	9.3586e-11	116340000	5058300
>Cluster-8535.14353;orf1 len=509 frame:-1 start:1984 end:458 gi|645007734|ref|XP_008216391.1| PREDICTED: multiple inositol polyphosphate phosphatase 1-like [Nasonia vitripennis]	1	3	3	6.3	58.598	9.888e-15	25635000	915520
>Cluster-8535.14373; len=287 start:421 end:1280; minus strand;>Cluster-8535.21742; len=287 start:421 end:1280; minus strand	2	7	7	34.3	32.479	1.0144e-91	682090000	42631000
>Cluster-8535.14698;orf1 len=469 frame:3 start:216 end:1622 gi|766918160|ref|XP_011496776.1| PREDICTED: tropomodulin isoform X2 [Ceratosolen solmsi marchali];>Cluster-8535.14382;orf1 len=455 frame:3 start:216 end:1580 gi|766918163|ref|XP_011496788.1| PREDICTED: tropomodulin isoform X3 [Ceratosolen solmsi marchali];>Cluster-8535.14714;orf1 len=375 frame:1 start:274 end:1398 gi|607367787|gb|EZA6191…	3	3	3	11.3	53.375	8.661e-15	160930000	7663500
>Cluster-8535.14386;orf1 len=1443 frame:-3 start:5884 end:1556 gi|645001088|ref|XP_008209376.1| PREDICTED: uncharacterized protein LOC100115922 isoform X6 [Nasonia vitripennis];>Cluster-8535.8166;orf1 len=208 frame:-2 start:2179 end:1556 gi|645001078|ref|XP_008209370.1| PREDICTED: uncharacterized protein LOC100115922 isoform X1 [Nasonia vitripennis];>Cluster-8535.8166;orf2 len=1311 frame:-3 start…	3	5	5	4.4	162.36	2.7779e-21	216670000	2675000
>Cluster-8535.14428;orf1 len=373 frame:-1 start:2702 end:1584 gi|156554739|ref|XP_001605381.1| PREDICTED: carbonic anhydrase 2-like [Nasonia vitripennis]	1	2	2	8.1	41.431	4.8359e-08	67665000	3222200
>Cluster-8535.14449;orf1 len=394 frame:-2 start:4480 end:3299 gi|645016205|ref|XP_008211381.1| PREDICTED: uncharacterized oxidoreductase C115.03-like [Nasonia vitripennis]	1	5	5	15.5	44.333	1.6893e-17	178050000	6848300
>Cluster-8535.14459;orf1 len=587 frame:3 start:21 end:1781 gi|229577287|ref|NP_001153340.1| alpha-glucosidase-like precursor [Nasonia vitripennis]	1	3	2	8.7	67.476	1.4194e-37	81492000	2810100
>Cluster-8535.14471;orf1 len=332 frame:1 start:34 end:1029 gi|766921596|ref|XP_011505326.1| PREDICTED: annexin B9-like [Ceratosolen solmsi marchali];>Cluster-8535.20842;orf1 len=191 frame:1 start:532 end:1104 gi|645028415|ref|XP_008208387.1| PREDICTED: annexin B9-like [Nasonia vitripennis]	2	8	8	34.1	36.599	1.1854e-53	847780000	47099000
>Cluster-8535.14474;orf1 len=617 frame:-2 start:4862 end:3012 gi|766917366|ref|XP_011505401.1| PREDICTED: V-type proton ATPase catalytic subunit A [Ceratosolen solmsi marchali]>gi|766917368|ref|XP_011505410.1| PREDICTED: V-type proton ATPase catalytic subunit A [Ceratosolen solmsi marchali]>gi|766917370|ref|XP_011505418.1| PREDICTED: V-type proton ATPase catalytic subunit A [Ceratosolen solmsi ma…	2	16	16	34.9	68.351	1.013e-69	1009700000	28849000
>Cluster-8535.1452;orf1 len=874 frame:-3 start:3116 end:495 gi|4503483|ref|NP_001952.1| elongation factor 2 [Homo sapiens]>gi|397497018|ref|XP_003819315.1| PREDICTED: elongation factor 2 [Pan paniscus]>gi|426386640|ref|XP_004059791.1| PREDICTED: elongation factor 2 [Gorilla gorilla gorilla]>gi|119172|sp|P13639.4|EF2_HUMAN RecName: Full=Elongation factor 2; Short=EF-2>gi|88909610|sp|Q5R8Z3.3|EF2_P…	12	8	5	10.7	96.868	9.9891e-24	48842000	1085400
>Cluster-8535.14521; len=125 start:65 end:439; minus strand;>Cluster-8535.11756; len=130 start:110 end:499; minus strand;>Cluster-20072.0;orf1 len=128 frame:1 start:118 end:501 gi|193582492|ref|XP_001947771.1| PREDICTED: histone H2B [Acyrthosiphon pisum]>gi|193603782|ref|XP_001950698.1| PREDICTED: histone H2B [Acyrthosiphon pisum];>Cluster-25141.0;orf1 len=128 frame:1 start:118 end:501 gi|1700597…	13	4	2	34.7	13.69	4.8158e-28	2348800000	335550000
>Cluster-8535.14537;orf1 len=235 frame:2 start:20 end:724 gi|766917432|ref|XP_011505718.1| PREDICTED: uncharacterized protein LOC105368403 [Ceratosolen solmsi marchali]	1	2	2	11.5	26.02	9.2854e-05	43328000	3094800
>Cluster-8535.14539;orf1 len=639 frame:-1 start:2692 end:776 gi|766922006|ref|XP_011505547.1| PREDICTED: very long-chain specific acyl-CoA dehydrogenase, mitochondrial [Ceratosolen solmsi marchali]	1	2	2	5.5	69.608	1.2073e-09	40896000	1105300
>Cluster-8535.14568;orf1 len=152 frame:3 start:249 end:704 gi|156542799|ref|XP_001607402.1| PREDICTED: profilin [Nasonia vitripennis]	1	3	3	29.1	16.585	9.0408e-09	251890000	27987000
>Cluster-8535.14617;orf1 len=264 frame:-1 start:5284 end:4493 gi|766924610|ref|XP_011494157.1| PREDICTED: proteasome subunit alpha type-6-like [Ceratosolen solmsi marchali];>Cluster-8535.15789;orf1 len=264 frame:-1 start:4572 end:3781 gi|769847587|ref|XP_011635135.1| PREDICTED: MOB kinase activator-like 1 [Pogonomyrmex barbatus];>Cluster-8535.16670;orf2 len=264 frame:-1 start:6822 end:6031 gi|769…	7	4	4	17.1	29.231	3.338e-11	117190000	5859700
>Cluster-8535.14695;orf1 len=617 frame:-2 start:4203 end:2353 gi|766939770|ref|XP_011502453.1| PREDICTED: 60 kDa heat shock protein, mitochondrial [Ceratosolen solmsi marchali]	1	10	9	24.4	65.782	4.3605e-56	733080000	22909000
>Cluster-8535.15499;orf1 len=204 frame:-3 start:914 end:303 gi|156552270|ref|XP_001600058.1| PREDICTED: epididymal secretory protein E1-like [Nasonia vitripennis]>gi|645017482|ref|XP_008206629.1| PREDICTED: epididymal secretory protein E1-like [Nasonia vitripennis];>Cluster-8535.14745;orf1 len=178 frame:-2 start:836 end:303 gi|156552270|ref|XP_001600058.1| PREDICTED: epididymal secretory protein …	2	2	2	16.7	23.083	7.781e-21	45419000	4129000
>Cluster-8535.14761;orf1 len=205 frame:3 start:156 end:770 gi|289177014|ref|NP_001165924.1| glutathione S-transferase S8 [Nasonia vitripennis]>gi|645012267|ref|XP_008207736.1| PREDICTED: glutathione S-transferase S8 isoform X1 [Nasonia vitripennis]	1	3	3	20.6	23.279	8.1098e-30	29841000	2486700
>Cluster-8535.14791;orf1 len=252 frame:-3 start:1119 end:364 gi|289629282|ref|NP_001166224.1| ferritin precursor [Nasonia vitripennis]	1	2	2	10	28.281	0.00020501	61836000	4416800
>Cluster-8535.14832;orf1 len=331 frame:-2 start:2047 end:1055 gi|645026140|ref|XP_001600184.3| PREDICTED: uncharacterized protein LOC100115464 [Nasonia vitripennis]	1	3	3	10.3	36.687	9.6741e-08	61660000	3083000
>Cluster-8535.14862; len=78 start:581 end:814; minus strand	1	2	2	34.6	9.3764	1.2582e-07	66943000	11157000
>Cluster-8535.14863;orf1 len=115 frame:3 start:105 end:449 gi|156541150|ref|XP_001601398.1| PREDICTED: 60S acidic ribosomal protein P2 [Nasonia vitripennis]	1	1	1	24.6	11.81	1.4929e-09	61674000	8810500
>Cluster-8535.14864;orf1 len=439 frame:1 start:502 end:1818 gi|645005010|ref|XP_001602620.2| PREDICTED: gastric triacylglycerol lipase-like [Nasonia vitripennis];>Cluster-8535.14865;orf1 len=439 frame:2 start:773 end:2089 gi|645005010|ref|XP_001602620.2| PREDICTED: gastric triacylglycerol lipase-like [Nasonia vitripennis];>Cluster-8535.16849;orf1 len=439 frame:2 start:350 end:1666 gi|645005010|re…	4	7	7	20.3	50.059	6.7774e-95	318960000	15189000
>Cluster-8535.15813;orf1 len=263 frame:1 start:304 end:1092 gi|759047050|ref|XP_011332534.1| PREDICTED: 14-3-3 protein zeta isoform X1 [Cerapachys biroi];>Cluster-8535.14875;orf1 len=262 frame:2 start:449 end:1234 gi|815794661|ref|XP_012217973.1| PREDICTED: 14-3-3 protein zeta isoform X1 [Linepithema humile];>Cluster-6313.0;orf1 len=257 frame:3 start:153 end:923 gi|395849798|ref|XP_003797501.1| P…	33	8	5	35.1	29.58	2.3781e-70	1821700000	113850000
>Cluster-8535.15342;orf1 len=334 frame:2 start:740 end:1741 gi|644991612|ref|XP_008202619.1| PREDICTED: RNA-binding protein squid-like isoform X2 [Nasonia vitripennis];>Cluster-8535.14879;orf1 len=290 frame:2 start:740 end:1609 gi|644991612|ref|XP_008202619.1| PREDICTED: RNA-binding protein squid-like isoform X2 [Nasonia vitripennis];>Cluster-8535.15343;orf1 len=284 frame:3 start:102 end:953 gi|6…	3	2	2	9	37.39	7.1152e-37	215790000	14386000
>Cluster-8535.14886;orf1 len=623 frame:2 start:188 end:2056 gi|817211481|ref|XP_012281879.1| PREDICTED: catalase [Orussus abietinus]	1	9	9	20.1	70.577	3.5375e-45	654730000	17230000
>Cluster-8535.14897;orf1 len=437 frame:2 start:284 end:1594 gi|239049675|ref|NP_001155060.1| serine protease homolog 21 precursor [Nasonia vitripennis]	1	15	15	38.8	47.337	1.6159e-241	9271200000	441480000
>Cluster-8535.14900;orf1 len=226 frame:1 start:31 end:708 gi|156548632|ref|XP_001608225.1| PREDICTED: glutathione S-transferase [Nasonia vitripennis]>gi|644993097|ref|XP_008203102.1| PREDICTED: glutathione S-transferase [Nasonia vitripennis]>gi|644993100|ref|XP_008203103.1| PREDICTED: glutathione S-transferase [Nasonia vitripennis]>gi|644993104|ref|XP_008203104.1| PREDICTED: glutathione S-transfe…	2	2	2	8.9	25.338	0.0022	15139000	1009300
>Cluster-8535.14913;orf1 len=428 frame:-1 start:4871 end:3588 gi|766930771|ref|XP_011497536.1| PREDICTED: cAMP-dependent protein kinase type I regulatory subunit [Ceratosolen solmsi marchali];>Cluster-8535.15139;orf1 len=428 frame:-2 start:5963 end:4680 gi|156545402|ref|XP_001606445.1| PREDICTED: leukocyte receptor cluster member 8 homolog isoform X2 [Nasonia vitripennis];>Cluster-8535.17548;orf1…	3	4	4	13.6	47.776	5.1708e-10	202980000	10149000
>Cluster-8535.14918;orf1 len=473 frame:-1 start:2882 end:1464 gi|345483324|ref|XP_003424792.1| PREDICTED: venom serine carboxypeptidase isoform X1 [Nasonia vitripennis]	1	2	2	4.7	53.925	7.0128e-05	84896000	4716400
>Cluster-8535.14941;orf1 len=575 frame:1 start:403 end:2127 gi|283135248|ref|NP_001164377.1| glucose-6-phosphate isomerase [Nasonia vitripennis];>Cluster-8535.773;orf1 len=581 frame:2 start:2 end:1744 gi|6653226|gb|AAF22645.1|AF187554_1 sperm antigen-36 [Homo sapiens];CON__Q3ZBD7	3	12	12	30.1	64.111	8.9692e-188	823810000	23537000
>Cluster-8535.14964;orf1 len=422 frame:1 start:124 end:1389 gi|766938018|ref|XP_011501490.1| PREDICTED: beta-ureidopropionase-like [Ceratosolen solmsi marchali]	1	6	6	20.7	47.143	3.3415e-35	1078100000	56740000
>Cluster-8535.14970;orf1 len=268 frame:2 start:149 end:952 gi|345497959|ref|XP_001602648.2| PREDICTED: phosphoglycerate mutase 2 [Nasonia vitripennis]	1	2	2	9.7	30.156	1.1324e-09	130840000	9345600
>Cluster-8535.14977;orf1 len=369 frame:1 start:181 end:1287 gi|345496040|ref|XP_001605332.2| PREDICTED: trypsin-3 [Nasonia vitripennis]	1	10	10	47.6	38.673	7.3134e-89	1472100000	92005000
>Cluster-8535.15604;orf1 len=496 frame:3 start:210 end:1697 gi|645036048|ref|XP_008216886.1| PREDICTED: plasminogen activator inhibitor 1 RNA-binding protein-like isoform X1 [Nasonia vitripennis];>Cluster-8535.14985;orf1 len=492 frame:3 start:210 end:1685 gi|645036051|ref|XP_008216887.1| PREDICTED: plasminogen activator inhibitor 1 RNA-binding protein-like isoform X2 [Nasonia vitripennis];>Cluste…	3	1	1	3.2	55.658	0.012883	0	0
>Cluster-8535.14994;orf1 len=329 frame:-1 start:1207 end:221 gi|645012758|ref|XP_008216463.1| PREDICTED: uncharacterized protein LOC100118265 [Nasonia vitripennis];>Cluster-8535.15513;orf1 len=329 frame:-2 start:1207 end:221 gi|645012758|ref|XP_008216463.1| PREDICTED: uncharacterized protein LOC100118265 [Nasonia vitripennis];>Cluster-8535.15757;orf1 len=329 frame:-1 start:1207 end:221 gi|6450127…	3	2	2	6.1	36.484	2.1787e-11	28631000	2863100
>Cluster-8535.14996;orf1 len=498 frame:2 start:1319 end:2812 gi|766932711|ref|XP_011498590.1| PREDICTED: aldehyde dehydrogenase X, mitochondrial [Ceratosolen solmsi marchali]	1	4	4	12.9	53.34	1.1536e-13	128990000	4777500
>Cluster-8535.15017;orf1 len=286 frame:-3 start:933 end:76 gi|156551529|ref|XP_001601315.1| PREDICTED: 40S ribosomal protein S3a [Nasonia vitripennis]	1	6	6	27	31.75	3.0229e-22	190250000	10570000
>Cluster-8535.15026;orf1 len=263 frame:-1 start:9295 end:8507 gi|769864512|ref|XP_011644141.1| PREDICTED: 3-hydroxyacyl-CoA dehydrogenase type-2 [Pogonomyrmex barbatus]	1	6	6	40.1	27.793	6.9803e-28	487250000	34804000
>Cluster-8535.15063;orf1 len=739 frame:-2 start:3405 end:1189 gi|345489283|ref|XP_001599525.2| PREDICTED: heat shock 70 kDa protein cognate 5 [Nasonia vitripennis]>gi|645023426|ref|XP_008205358.1| PREDICTED: heat shock 70 kDa protein cognate 5 [Nasonia vitripennis];>Cluster-24741.0;orf1 len=186 frame:1 start:1 end:558 gi|733908557|ref|XP_010717168.1| PREDICTED: stress-70 protein, mitochondrial [M…	2	8	7	14.8	80.609	8.078e-32	437700000	10421000
>Cluster-8535.15072;orf1 len=547 frame:1 start:73 end:1713 gi|645017293|ref|XP_008205526.1| PREDICTED: dihydrolipoyllysine-residue succinyltransferase component of 2-oxoglutarate dehydrogenase complex, mitochondrial isoform X2 [Nasonia vitripennis]	1	7	7	17.8	59.483	5.1672e-48	1042700000	35955000
>Cluster-8535.15078;orf1 len=832 frame:-1 start:3141 end:646 gi|766925740|ref|XP_011494775.1| PREDICTED: endoplasmin [Ceratosolen solmsi marchali]	1	5	4	6.1	95.201	1.9889e-12	46687000	1037500
>Cluster-8535.15084;orf1 len=527 frame:-3 start:2005 end:425 gi|229577383|ref|NP_001153366.1| ATP synthase subunit beta, mitochondrial [Nasonia vitripennis];>Cluster-24090.0;orf1 len=528 frame:1 start:1 end:1584 gi|768401058|ref|XP_011596458.1| PREDICTED: ATP synthase subunit beta, mitochondrial [Aquila chrysaetos canadensis];>Cluster-8535.821; len=368 start:1 end:1102; minus strand;>Cluster-1104…	10	24	20	70.5	56.121	6.0612e-261	12117000000	432760000
>Cluster-8535.15088;orf1 len=431 frame:2 start:269 end:1561 gi|156554114|ref|XP_001601087.1| PREDICTED: cAMP-dependent protein kinase type II regulatory subunit [Nasonia vitripennis]>gi|345492828|ref|XP_003426935.1| PREDICTED: cAMP-dependent protein kinase type II regulatory subunit [Nasonia vitripennis]>gi|345492831|ref|XP_003426936.1| PREDICTED: cAMP-dependent protein kinase type II regulatory …	2	1	1	4	48.454	0.0010505	0	0
>Cluster-8535.15100;orf1 len=465 frame:-2 start:3990 end:2596 gi|266634746|ref|NP_001161183.1| serpin 5 precursor [Nasonia vitripennis]	1	4	4	9.1	51.686	1.3812e-12	150950000	6563000
>Cluster-8535.15107;orf1 len=257 frame:1 start:58 end:828 gi|645039458|ref|XP_008203832.1| PREDICTED: ferritin heavy polypeptide-like 17 [Nasonia vitripennis]	1	4	4	21.1	28.948	6.6685e-16	276130000	25102000
>Cluster-8535.15114;orf1 len=210 frame:-1 start:982 end:353 gi|645010088|ref|XP_008213410.1| PREDICTED: troponin I isoform X16 [Nasonia vitripennis];>Cluster-8535.18179;orf1 len=204 frame:-1 start:964 end:353 gi|645010088|ref|XP_008213410.1| PREDICTED: troponin I isoform X16 [Nasonia vitripennis];>Cluster-8535.10864;orf1 len=220 frame:-1 start:1223 end:564 gi|766941751|ref|XP_011503524.1| PREDICT…	3	9	6	33.5	25.04	3.8252e-102	5988900000	748610000
>Cluster-8535.15117;orf1 len=215 frame:-1 start:784 end:140 gi|345494466|ref|XP_003427298.1| PREDICTED: peptidyl-prolyl cis-trans isomerase B [Nasonia vitripennis]	1	8	8	44.4	23.238	4.3679e-35	1614200000	124170000
>Cluster-8535.15119;orf1 len=301 frame:3 start:3 end:905 gi|645032350|ref|XP_008214712.1| PREDICTED: uncharacterized protein LOC100121014 [Nasonia vitripennis]>gi|355389969|emb|CCD17817.1| putative odorant binding protein 48 [Nasonia vitripennis];>Cluster-8535.15576;orf1 len=280 frame:3 start:33 end:872 gi|645032350|ref|XP_008214712.1| PREDICTED: uncharacterized protein LOC100121014 [Nasonia vitr…	2	7	7	31	33.605	5.1483e-145	518330000	30490000
>Cluster-8535.15143;orf2 len=505 frame:1 start:499 end:2013 gi|645017427|ref|XP_008205583.1| PREDICTED: hypoxia-inducible factor 1-alpha-like [Nasonia vitripennis];>Cluster-8535.15555;orf2 len=505 frame:1 start:499 end:2013 gi|766921326|ref|XP_011505178.1| PREDICTED: V-type proton ATPase subunit B [Ceratosolen solmsi marchali];>Cluster-7590.0; len=194 start:13 end:594; minus strand;>Cluster-22703…	6	13	12	41.5	56.111	1.981e-67	678090000	25114000
>Cluster-8535.16260; len=393 start:129 end:1306; minus strand;>Cluster-8535.15272;orf1 len=350 frame:3 start:84 end:1133 gi|751209329|ref|XP_011157314.1| PREDICTED: RNA-binding protein lark isoform X7 [Solenopsis invicta];>Cluster-8535.16261;orf1 len=348 frame:3 start:84 end:1127 gi|766940722|ref|XP_011502970.1| PREDICTED: RNA-binding protein lark isoform X3 [Ceratosolen solmsi marchali]>gi|76694…	12	2	2	5.6	44.232	1.1385e-07	110810000	4616900
>Cluster-8535.15170;orf1 len=104 frame:-3 start:1500 end:1189 gi|805801836|ref|XP_012144781.1| PREDICTED: dynein light chain 2, cytoplasmic isoform X4 [Megachile rotundata]	1	2	2	32	12.033	3.068e-32	104110000	20822000
>Cluster-8535.15172;orf1 len=928 frame:1 start:946 end:3729 gi|229577219|ref|NP_001153329.1| tudor staphylococcus/micrococcal nuclease [Nasonia vitripennis]>gi|645022274|ref|XP_008211060.1| PREDICTED: tudor staphylococcus/micrococcal nuclease isoform X1 [Nasonia vitripennis]>gi|645022277|ref|XP_008211066.1| PREDICTED: tudor staphylococcus/micrococcal nuclease isoform X1 [Nasonia vitripennis]	1	8	8	11.4	103.61	1.7467e-27	440350000	8308500
>Cluster-8535.15194;orf1 len=480 frame:2 start:47 end:1486 gi|741893281|ref|XP_005195212.2| PREDICTED: tubulin alpha-3 chain isoform X1 [Bos taurus];>Cluster-8535.14615; len=303 start:1 end:907; minus strand;>Cluster-8535.29685; len=472 start:1 end:1416; minus strand;>Cluster-12228.0;orf1 len=174 frame:2 start:2 end:523 gi|135433|sp|P28287.1|TBA_OXYGR RecName: Full=Tubulin alpha chain [Oxytricha …	4	9	2	29.6	53.303	4.5628e-56	182550000	8297700
>Cluster-8535.15223;orf1 len=450 frame:2 start:251 end:1600 gi|766937236|ref|XP_011501061.1| PREDICTED: putative ATP-dependent RNA helicase me31b [Ceratosolen solmsi marchali];>Cluster-8535.16219;orf1 len=450 frame:3 start:285 end:1634 gi|766937236|ref|XP_011501061.1| PREDICTED: putative ATP-dependent RNA helicase me31b [Ceratosolen solmsi marchali]	2	1	1	3.1	51.267	0.00032071	0	0
>Cluster-8535.15239;orf1 len=397 frame:-3 start:2793 end:1603 gi|665794151|ref|XP_008544759.1| PREDICTED: arginine kinase isoform X1 [Microplitis demolitor];>Cluster-8535.15543;orf1 len=382 frame:-2 start:2748 end:1603 gi|665794151|ref|XP_008544759.1| PREDICTED: arginine kinase isoform X1 [Microplitis demolitor];>Cluster-11767.0;orf1 len=213 frame:2 start:2 end:640 gi|53830710|gb|AAU95198.1| puta…	3	16	16	49	44.075	8.7593e-122	3722200000	169190000
>Cluster-8535.15244;orf1 len=742 frame:2 start:1067 end:3292 gi|345485415|ref|XP_001605609.2| PREDICTED: eukaryotic peptide chain release factor GTP-binding subunit ERF3A isoform X1 [Nasonia vitripennis]	1	1	1	2.2	80.551	0.0045689	9847100	307720
>Cluster-8535.15267;orf1 len=174 frame:-1 start:522 end:1 gi|645011635|ref|XP_001601301.2| PREDICTED: peroxisomal hydratase-dehydrogenase-epimerase [Nasonia vitripennis];>Cluster-8535.22458;orf1 len=174 frame:-3 start:522 end:1 gi|645011635|ref|XP_001601301.2| PREDICTED: peroxisomal hydratase-dehydrogenase-epimerase [Nasonia vitripennis];>Cluster-8535.11901;orf1 len=267 frame:-2 start:1400 end:60…	3	4	4	33.9	18.572	3.6933e-18	126980000	11543000
>Cluster-8535.15297;orf1 len=271 frame:-2 start:3322 end:2510 gi|345490916|ref|XP_001607941.2| PREDICTED: upstream activation factor subunit spp27 [Nasonia vitripennis]	1	2	2	9.6	30.129	3.852e-05	75941000	6903700
>Cluster-8535.15330;orf1 len=1061 frame:-3 start:4847 end:1665 gi|766942064|ref|XP_011503681.1| PREDICTED: ubiquitin-like modifier-activating enzyme 1 [Ceratosolen solmsi marchali];>Cluster-6157.0;orf1 len=1121 frame:-1 start:3550 end:188 gi|768033354|ref|XP_011542256.1| PREDICTED: ubiquitin-like modifier-activating enzyme 1 isoform X3 [Homo sapiens];>Cluster-6157.1;orf1 len=1069 frame:-1 start:3…	4	3	3	3.6	119.16	7.2627e-18	51241000	931660
>Cluster-8535.15370;orf1 len=446 frame:-2 start:5748 end:4411 gi|645002582|ref|XP_008207925.1| PREDICTED: synaptotagmin 1 isoform X4 [Nasonia vitripennis]	1	2	2	7.6	49.822	1.8155e-15	38468000	1538700
>Cluster-8535.15374;orf1 len=248 frame:3 start:3 end:746 gi|644994146|ref|XP_008214317.1| PREDICTED: uncharacterized protein LOC103317616 [Nasonia vitripennis]	1	8	6	32	27.408	8.773e-128	2744100000	274410000
>Cluster-8535.15408;orf2 len=496 frame:-2 start:5989 end:4502 gi|345481224|ref|XP_001604026.2| PREDICTED: mesencephalic astrocyte-derived neurotrophic factor homolog [Nasonia vitripennis]>gi|645027158|ref|XP_008209013.1| PREDICTED: mesencephalic astrocyte-derived neurotrophic factor homolog [Nasonia vitripennis]	1	2	2	3.8	55.01	0.00022679	31362000	1844800
>Cluster-8535.22466;orf2 len=616 frame:3 start:165 end:2012 gi|755929017|ref|XP_011309365.1| PREDICTED: heterogeneous nuclear ribonucleoprotein R isoform X7 [Fopius arisanus];>Cluster-8535.15425;orf2 len=577 frame:3 start:2778 end:4508 gi|766935063|ref|XP_011499877.1| PREDICTED: heterogeneous nuclear ribonucleoprotein R isoform X6 [Ceratosolen solmsi marchali]>gi|766935065|ref|XP_011499878.1| PRE…	3	4	4	8.8	69.344	3.7607e-88	89177000	2547900
>Cluster-8535.15429;orf1 len=3415 frame:1 start:1 end:10245 gi|156538313|ref|XP_001604024.1| PREDICTED: apolipophorins [Nasonia vitripennis]	1	28	28	10.5	379.08	1.1117e-99	928500000	4938800
>Cluster-8535.15432;orf1 len=669 frame:-2 start:2706 end:700 gi|815903390|ref|XP_012237680.1| PREDICTED: NADP-dependent malic enzyme isoform X1 [Bombus impatiens];>Cluster-8535.18236;orf1 len=669 frame:-1 start:2706 end:700 gi|815903390|ref|XP_012237680.1| PREDICTED: NADP-dependent malic enzyme isoform X1 [Bombus impatiens];>Cluster-8535.15894;orf1 len=651 frame:-1 start:2652 end:700 gi|815903390…	3	13	13	29.5	73.847	2.9617e-110	641520000	15274000
>Cluster-8535.15469; len=173 start:384 end:901; minus strand	1	10	10	64	18.991	2.5408e-129	1882900000	171170000
>Cluster-8535.15474;orf1 len=520 frame:1 start:454 end:2013 gi|766935105|ref|XP_011499900.1| PREDICTED: aldehyde dehydrogenase, mitochondrial [Ceratosolen solmsi marchali]	1	5	5	11.6	56.588	6.9013e-16	91944000	3170500
>Cluster-8535.15476;orf1 len=483 frame:2 start:6965 end:8413 gi|766929951|ref|XP_011497090.1| PREDICTED: mitochondrial-processing peptidase subunit beta isoform X1 [Ceratosolen solmsi marchali];>Cluster-8535.18958;orf1 len=483 frame:1 start:6892 end:8340 gi|766929951|ref|XP_011497090.1| PREDICTED: mitochondrial-processing peptidase subunit beta isoform X1 [Ceratosolen solmsi marchali];>Cluster-85…	4	4	4	11.6	54.098	9.3331e-15	172280000	5940600
>Cluster-8535.15531;orf1 len=855 frame:2 start:515 end:3079 gi|766918370|ref|XP_011497950.1| PREDICTED: heat shock 70 kDa protein 4 isoform X2 [Ceratosolen solmsi marchali]	1	4	4	5.2	96.491	5.7028e-09	98284000	1890100
>Cluster-8535.15538;orf1 len=480 frame:-2 start:2049 end:610 gi|645015478|ref|XP_003426353.2| PREDICTED: enolase isoform X1 [Nasonia vitripennis]	1	10	10	31.9	52.12	2.1034e-34	1831300000	76303000
>Cluster-8535.15550;orf1 len=1813 frame:3 start:81 end:5519 gi|156550697|ref|XP_001607388.1| PREDICTED: vitellogenin [Nasonia vitripennis]	1	38	38	29.4	204.22	0	4922400000	49224000
>Cluster-8535.15556;orf2 len=417 frame:1 start:226 end:1476 gi|644992631|ref|XP_008202949.1| PREDICTED: heterogeneous nuclear ribonucleoprotein A1, A2/B1 homolog isoform X2 [Nasonia vitripennis];>Cluster-2742.2;orf1 len=329 frame:2 start:194 end:1180 gi|114601869|ref|XP_001169959.1| PREDICTED: heterogeneous nuclear ribonucleoprotein A0 [Pan troglodytes]>gi|397518219|ref|XP_003829292.1| PREDICTED:…	2	2	2	3.8	43.058	0.0021705	51677000	2870900
>Cluster-8535.15560;orf1 len=211 frame:-1 start:1554 end:922 gi|156553185|ref|XP_001600020.1| PREDICTED: protein lethal(2)essential for life [Nasonia vitripennis]>gi|645027410|ref|XP_008214462.1| PREDICTED: protein lethal(2)essential for life [Nasonia vitripennis]>gi|645027412|ref|XP_008214463.1| PREDICTED: protein lethal(2)essential for life [Nasonia vitripennis]>gi|645027414|ref|XP_008214464.1|…	1	2	2	11.4	23.83	2.5711e-35	10505000	955000
>Cluster-8535.15561; len=1681 start:533 end:5575; minus strand	1	22	1	23.3	181.34	1.2329e-141	95864000	1042000
>Cluster-8535.15565;orf1 len=185 frame:-2 start:1681 end:1127 gi|156549869|ref|XP_001599602.1| PREDICTED: 40S ribosomal protein S10 [Nasonia vitripennis]	1	3	3	22.8	20.881	5.9149e-08	131290000	13129000
>Cluster-8535.15570;orf1 len=327 frame:-2 start:1232 end:252 gi|229576961|ref|NP_001153411.1| aldo-keto reductase-like [Nasonia vitripennis]	1	2	2	9.5	37.023	1.1585e-05	94130000	4482400
>Cluster-8535.15591;orf1 len=854 frame:3 start:234 end:2795 gi|345488586|ref|XP_001602460.2| PREDICTED: translation elongation factor 2 [Nasonia vitripennis];>Cluster-10881.2;orf1 len=803 frame:-2 start:2411 end:3 gi|470420396|ref|XP_004337289.1| eukaryotic translation elongation factor 2, putative [Acanthamoeba castellanii str. Neff]>gi|440794105|gb|ELR15276.1| eukaryotic translation elongation …	7	13	9	16.4	95.475	5.575e-34	834280000	17751000
>Cluster-8535.15597;orf3 len=1058 frame:-3 start:5881 end:2708 gi|645015638|ref|XP_008206544.1| PREDICTED: collagen alpha-1(I) chain-like [Nasonia vitripennis];>Cluster-8535.15598;orf2 len=1058 frame:-3 start:5881 end:2708 gi|766932221|ref|XP_011498322.1| PREDICTED: lysosomal alpha-mannosidase [Ceratosolen solmsi marchali]	2	6	6	7	120.77	3.3057e-27	101310000	1876100
>Cluster-8535.15609;orf1 len=113 frame:-3 start:857 end:519 gi|817184463|ref|XP_012281767.1| PREDICTED: cytochrome c-2 [Orussus abietinus]>gi|817184465|ref|XP_012281775.1| PREDICTED: cytochrome c-2 [Orussus abietinus]	1	4	4	31.2	12.284	9.8904e-16	813570000	116220000
>Cluster-8535.16153;orf1 len=318 frame:3 start:189 end:1142 gi|645016937|ref|XP_008211693.1| PREDICTED: uncharacterized protein LOC100114909, partial [Nasonia vitripennis];>Cluster-8535.15617;orf1 len=308 frame:3 start:189 end:1112 gi|645016937|ref|XP_008211693.1| PREDICTED: uncharacterized protein LOC100114909, partial [Nasonia vitripennis]	2	2	2	11.4	34.121	2.1294e-19	178060000	19784000
>Cluster-8535.15623;orf1 len=442 frame:3 start:276 end:1601 gi|645031490|ref|XP_008210146.1| PREDICTED: failed axon connections isoform X1 [Nasonia vitripennis]	1	1	1	2.5	49.651	3.816e-05	15773000	751110
>Cluster-8535.15626;orf1 len=350 frame:1 start:2758 end:3807 gi|156552406|ref|XP_001602166.1| PREDICTED: transaldolase isoform X2 [Nasonia vitripennis];>Cluster-8535.1179;orf1 len=348 frame:1 start:1 end:1044 gi|57099501|ref|XP_533146.1| PREDICTED: transaldolase isoform 4 [Canis lupus familiaris]>gi|359321944|ref|XP_003639736.1| PREDICTED: transaldolase-like [Canis lupus familiaris]	2	3	3	9.5	38.903	4.0721e-08	262270000	13804000
>Cluster-8535.15645;orf1 len=316 frame:-3 start:1094 end:147 gi|345485899|ref|XP_003425364.1| PREDICTED: 1,5-anhydro-D-fructose reductase-like [Nasonia vitripennis]	1	1	1	4.1	35.619	0.003797	0	0
>Cluster-8535.15656;orf1 len=539 frame:1 start:241 end:1857 gi|766928552|ref|XP_011496324.1| PREDICTED: pyruvate kinase-like [Ceratosolen solmsi marchali]	1	12	12	31	58.162	1.9307e-76	1075100000	38398000
>Cluster-8535.15669;orf1 len=473 frame:-3 start:4612 end:3194 gi|345485566|ref|XP_003425295.1| PREDICTED: amphiphysin isoform X1 [Nasonia vitripennis];>Cluster-8535.16829;orf1 len=461 frame:-3 start:4576 end:3194 gi|345485568|ref|XP_001606930.2| PREDICTED: myc box-dependent-interacting protein 1 isoform X2 [Nasonia vitripennis];>Cluster-8535.16830;orf1 len=404 frame:-3 start:4405 end:3194 gi|6450…	3	5	5	14.2	52.954	1.9115e-19	157370000	8282400
>Cluster-8535.15691;orf1 len=234 frame:-3 start:1019 end:318 gi|805784468|ref|XP_003703131.2| PREDICTED: 60S ribosomal protein L9 [Megachile rotundata]	1	2	2	10.3	26.29	5.9124e-13	51232000	4269400
>Cluster-8535.15694;orf1 len=662 frame:-2 start:5424 end:3439 gi|645020850|ref|XP_008207344.1| PREDICTED: centrosomal protein of 120 kDa-like [Nasonia vitripennis]	1	3	3	5	75.812	7.8861e-06	66088000	2002700
>Cluster-8535.15730;orf1 len=159 frame:-2 start:549 end:73 gi|156546383|ref|XP_001606878.1| PREDICTED: 60S ribosomal protein L35a [Nasonia vitripennis]	1	1	1	7.6	17.995	7.5865e-07	143450000	17931000
>Cluster-8535.15731;orf2 len=394 frame:-3 start:7765 end:6584 gi|645013540|ref|XP_008205155.1| PREDICTED: probable RISC-loading complex subunit BRAFLDRAFT_242885 isoform X1 [Nasonia vitripennis]>gi|645013542|ref|XP_008205156.1| PREDICTED: probable RISC-loading complex subunit BRAFLDRAFT_242885 isoform X1 [Nasonia vitripennis]>gi|645013544|ref|XP_008205157.1| PREDICTED: probable RISC-loading compl…	3	1	1	3.1	43.991	1.318e-07	12739000	749360
>Cluster-8535.15736; len=1966 start:14159 end:20052; minus strand;>Cluster-8535.15997; len=1966 start:14116 end:20009; minus strand	2	2	2	1.4	224.05	3.0206e-05	16564000	131460
>Cluster-8535.15738;orf1 len=337 frame:3 start:162 end:1172 gi|644992794|ref|XP_008203004.1| PREDICTED: 40S ribosomal protein SA [Nasonia vitripennis]	1	2	2	8.6	36.372	3.0153e-49	67634000	6148500
>Cluster-8535.15741;orf1 len=1849 frame:-1 start:6699 end:1153 gi|644997257|ref|XP_008212277.1| PREDICTED: titin isoform X1 [Nasonia vitripennis]	1	6	6	4.9	208.66	2.6634e-28	113370000	1206000
>Cluster-8535.15742;orf1 len=668 frame:1 start:1 end:2004 gi|644997257|ref|XP_008212277.1| PREDICTED: titin isoform X1 [Nasonia vitripennis]	1	3	3	5.5	77.933	1.79e-07	140730000	4539800
>Cluster-8535.15755; len=157 start:517 end:987; minus strand;>Cluster-11269.0;orf1 len=178 frame:3 start:3 end:536 gi|506968571|gb|AGM32629.1| putative nucleoside diphosphate kinase [Coptotermes formosanus];>Cluster-8535.29374;orf1 len=215 frame:3 start:3 end:647 gi|444721520|gb|ELW62253.1| Nucleoside diphosphate kinase B [Tupaia chinensis];>Cluster-8535.29375;orf1 len=161 frame:3 start:51 end:53…	5	6	5	41.7	17.671	4.9842e-25	715250000	71525000
>Cluster-8535.15776;orf1 len=611 frame:-3 start:10664 end:8832 gi|156544736|ref|XP_001605883.1| PREDICTED: lamin Dm0-like isoform X1 [Nasonia vitripennis]>gi|645010530|ref|XP_008213521.1| PREDICTED: lamin Dm0-like isoform X1 [Nasonia vitripennis]>gi|645010532|ref|XP_008213522.1| PREDICTED: lamin Dm0-like isoform X1 [Nasonia vitripennis];>Cluster-8535.17561;orf1 len=608 frame:-3 start:10730 end:89…	2	2	2	6.2	70.23	1.0991e-07	105910000	2715600
>Cluster-8535.15777;orf1 len=124 frame:1 start:631 end:1002 gi|156545936|ref|XP_001601566.1| PREDICTED: uncharacterized protein LOC100113708 [Nasonia vitripennis]>gi|355389929|emb|CCD17797.1| putative odorant binding protein 28 [Nasonia vitripennis]	1	2	2	29.3	13.979	7.7916e-25	216620000	43325000
>Cluster-8535.15790;orf1 len=449 frame:-1 start:4553 end:3207 gi|645015670|ref|XP_008206561.1| PREDICTED: high mobility group protein DSP1 [Nasonia vitripennis];>Cluster-8535.15791;orf1 len=217 frame:-2 start:3858 end:3208 gi|645015670|ref|XP_008206561.1| PREDICTED: high mobility group protein DSP1 [Nasonia vitripennis]	2	2	2	4.9	50.245	0.00036593	124520000	8301100
>Cluster-8535.15799;orf1 len=667 frame:-2 start:2567 end:567 gi|766921016|ref|XP_011505006.1| PREDICTED: polyadenylate-binding protein 4-like [Ceratosolen solmsi marchali];>Cluster-8535.29789; len=556 start:496 end:2162; minus strand;>Cluster-10832.1;orf1 len=522 frame:-2 start:1567 end:2 gi|646719456|gb|KDR21568.1| Polyadenylate-binding protein 1 [Zootermopsis nevadensis];>Cluster-23696.0; len=4…	5	3	3	5.6	74.195	3.8779e-15	0	0
>Cluster-8535.15808;orf1 len=135 frame:1 start:1 end:405 gi|766937413|ref|XP_011501158.1| PREDICTED: 40S ribosomal protein S25, partial [Ceratosolen solmsi marchali];>Cluster-12852.0; len=97 start:42 end:330; minus strand	2	2	2	14.2	14.894	3.297e-10	24948000	3564000
>Cluster-8535.15810;orf1 len=561 frame:3 start:108 end:1790 gi|269784695|ref|NP_001161449.1| ATP synthase subunit alpha, mitochondrial [Nasonia vitripennis];>Cluster-12861.0; len=366 start:91 end:1189; minus strand;>Cluster-25973.1; len=284 start:1 end:850; minus strand;>Cluster-8535.3326; len=133 start:393 end:789; minus strand;>Cluster-22817.0; len=110 start:1 end:327; minus strand;>Cluster-104…	8	16	8	35.5	60.682	4.5192e-100	6133400000	180390000
>Cluster-8535.15829;orf1 len=601 frame:2 start:149 end:1951 gi|156554010|ref|XP_001605879.1| PREDICTED: digestive cysteine proteinase 1 [Nasonia vitripennis]>gi|645003015|ref|XP_008208099.1| PREDICTED: digestive cysteine proteinase 1 [Nasonia vitripennis]>gi|645003017|ref|XP_008208100.1| PREDICTED: digestive cysteine proteinase 1 [Nasonia vitripennis]	1	4	4	7.8	68.188	4.7944e-09	227970000	6908000
>Cluster-8535.15852;orf1 len=498 frame:1 start:388 end:1881 gi|229608897|ref|NP_001153469.1| muscle LIM protein isoform 1 [Nasonia vitripennis];>Cluster-8535.15733;orf1 len=97 frame:1 start:388 end:678 gi|229608897|ref|NP_001153469.1| muscle LIM protein isoform 1 [Nasonia vitripennis];>Cluster-13205.0;orf1 len=126 frame:3 start:3 end:380 gi|90819980|gb|ABD98747.1| LIM-like protein [Graphocephala …	3	12	12	38.8	53.629	1.4128e-192	2818300000	117430000
>Cluster-8535.15857;orf1 len=375 frame:2 start:452 end:1576 gi|156554573|ref|XP_001600933.1| PREDICTED: 6-phosphogluconate dehydrogenase, decarboxylating [Nasonia vitripennis]	1	4	3	17.4	40.953	4.7001e-16	21738000	1358600
>Cluster-8535.15857;orf2 len=185 frame:3 start:1425 end:1979 gi|156554573|ref|XP_001600933.1| PREDICTED: 6-phosphogluconate dehydrogenase, decarboxylating [Nasonia vitripennis]	1	1	1	6.5	20.584	0.00011163	31220000	2838200
>Cluster-8535.15962;orf1 len=392 frame:-2 start:5190 end:4015 gi|817060229|ref|XP_012251658.1| PREDICTED: Y-box factor homolog isoform X1 [Athalia rosae];>Cluster-8535.15866;orf1 len=372 frame:-2 start:5130 end:4015 gi|817060229|ref|XP_012251658.1| PREDICTED: Y-box factor homolog isoform X1 [Athalia rosae]	2	1	1	4.1	41.268	0.0024689	0	0
>Cluster-8535.15883;orf1 len=388 frame:-1 start:1395 end:232 gi|766918508|ref|XP_011498731.1| PREDICTED: lysosomal aspartic protease [Ceratosolen solmsi marchali]	1	9	9	37.5	42.026	2.4247e-52	550240000	30569000
>Cluster-8535.15896;orf2 len=521 frame:3 start:2724 end:4286 gi|645021230|ref|XP_008207498.1| PREDICTED: limulus clotting factor C [Nasonia vitripennis];>Cluster-8535.10704;orf3 len=486 frame:1 start:2902 end:4359 gi|645021230|ref|XP_008207498.1| PREDICTED: limulus clotting factor C [Nasonia vitripennis]	2	12	12	29.6	57.719	1.7759e-122	2383000000	76870000
>Cluster-8535.15904;orf1 len=254 frame:2 start:197 end:958 gi|156546546|ref|XP_001607329.1| PREDICTED: 60S ribosomal protein L13 [Nasonia vitripennis]	1	2	2	7.9	28.948	1.5964e-12	80029000	6156100
>Cluster-8535.15910;orf1 len=516 frame:3 start:177 end:1724 gi|156551115|ref|XP_001603449.1| PREDICTED: retinal dehydrogenase 1-like isoform X1 [Nasonia vitripennis]>gi|645017185|ref|XP_008205483.1| PREDICTED: retinal dehydrogenase 1-like isoform X1 [Nasonia vitripennis];>Cluster-8535.17955;orf1 len=516 frame:3 start:177 end:1724 gi|156551115|ref|XP_001603449.1| PREDICTED: retinal dehydrogenase 1…	2	1	1	2.7	55.711	0.00080425	21382000	737320
>Cluster-8535.15917;orf1 len=806 frame:-1 start:3272 end:855 gi|345480007|ref|XP_001603578.2| PREDICTED: prolyl endopeptidase [Nasonia vitripennis]>gi|645003293|ref|XP_008212488.1| PREDICTED: prolyl endopeptidase [Nasonia vitripennis];>Cluster-8535.17661;orf1 len=806 frame:-2 start:3272 end:855 gi|345480007|ref|XP_001603578.2| PREDICTED: prolyl endopeptidase [Nasonia vitripennis]>gi|645003293|ref…	4	2	2	4.5	90.586	1.9444e-07	0	0
>Cluster-8535.15919;orf1 len=630 frame:3 start:123 end:2012 gi|766939381|ref|XP_011502241.1| PREDICTED: transketolase [Ceratosolen solmsi marchali]	1	7	7	20	68.472	5.2365e-56	564280000	16596000
>Cluster-8535.15920;orf1 len=439 frame:-1 start:4296 end:2980 gi|645002404|ref|XP_008214369.1| PREDICTED: eukaryotic initiation factor 4A-I [Nasonia vitripennis];>Cluster-8535.16679;orf1 len=439 frame:-1 start:3186 end:1870 gi|645002404|ref|XP_008214369.1| PREDICTED: eukaryotic initiation factor 4A-I [Nasonia vitripennis]	2	2	2	4.8	50.114	0.00068514	19952000	767370
>Cluster-8535.15923;orf1 len=907 frame:1 start:202 end:2922 gi|645026448|ref|XP_008213931.1| PREDICTED: paramyosin, long form-like [Nasonia vitripennis];>Cluster-14932.0;orf1 len=787 frame:3 start:3 end:2363 gi|641679200|ref|XP_008188458.1| PREDICTED: paramyosin, long form [Acyrthosiphon pisum]	2	6	6	9.4	105.65	9.3811e-52	214710000	4294100
>Cluster-8535.15924;orf1 len=439 frame:2 start:806 end:2122 gi|156540778|ref|XP_001599305.1| PREDICTED: chitinase-like protein Idgf4 [Nasonia vitripennis]	1	12	12	38.8	48.322	4.9768e-42	915170000	50843000
>Cluster-8535.15926;orf1 len=635 frame:-1 start:3449 end:1545 gi|766936292|ref|XP_011500549.1| PREDICTED: lysine--tRNA ligase isoform X1 [Ceratosolen solmsi marchali];>Cluster-8535.19389;orf1 len=632 frame:-3 start:3440 end:1545 gi|766936292|ref|XP_011500549.1| PREDICTED: lysine--tRNA ligase isoform X1 [Ceratosolen solmsi marchali]	2	1	1	2.5	72.347	6.5863e-16	0	0
>Cluster-8535.15938;orf1 len=380 frame:3 start:186 end:1325 gi|766926823|ref|XP_011495377.1| PREDICTED: malate dehydrogenase, cytoplasmic [Ceratosolen solmsi marchali]	1	7	7	24.5	41.385	7.0591e-46	593350000	26970000
>Cluster-8535.15946;orf1 len=563 frame:-2 start:2723 end:1035 gi|156548992|ref|XP_001607265.1| PREDICTED: glutamate dehydrogenase, mitochondrial [Nasonia vitripennis]	1	12	12	30.6	61.915	4.7629e-32	694870000	20437000
>Cluster-8535.15956;orf1 len=215 frame:3 start:30 end:674 gi|345480682|ref|XP_001602474.2| PREDICTED: uncharacterized protein PFB0145c-like [Nasonia vitripennis]	1	9	9	59.8	23.746	5.3738e-79	2446200000	174730000
>Cluster-8535.15966;orf1 len=506 frame:-3 start:2884 end:1367 gi|645033496|ref|XP_001605967.2| PREDICTED: uncharacterized protein LOC100122362 [Nasonia vitripennis]	1	4	4	11.3	54.81	3.5635e-10	95335000	3404800
>Cluster-8535.15968;orf1 len=322 frame:-3 start:1721 end:756 gi|156547253|ref|XP_001601340.1| PREDICTED: lambda-crystallin homolog [Nasonia vitripennis]	1	6	6	29.3	36.032	5.8679e-75	246000000	12300000
>Cluster-8535.15970;orf1 len=260 frame:-2 start:3520 end:2741 gi|156553405|ref|XP_001599521.1| PREDICTED: vesicle-associated membrane protein-associated protein A [Nasonia vitripennis]	1	2	2	10.4	28.854	9.1216e-122	31426000	2095000
>Cluster-8535.15991;orf1 len=351 frame:-2 start:4335 end:3283 gi|239787140|ref|NP_001155172.1| inosine-uridine preferring nucleoside hydrolase-like precursor [Nasonia vitripennis]	1	15	15	62	38.869	0	13547000000	903110000
>Cluster-8535.16010;orf1 len=378 frame:-1 start:1895 end:762 gi|766921826|ref|XP_011505448.1| PREDICTED: glutamine synthetase 2 cytoplasmic-like [Ceratosolen solmsi marchali]>gi|766921828|ref|XP_011505449.1| PREDICTED: glutamine synthetase 2 cytoplasmic-like [Ceratosolen solmsi marchali]	1	4	3	13.5	42.244	1.1373e-10	18159000	1068200
>Cluster-8535.16035;orf2 len=301 frame:-2 start:5736 end:4834 gi|645011546|ref|XP_008214297.1| PREDICTED: 14-3-3 protein epsilon isoform X1 [Nasonia vitripennis];>Cluster-8535.16031;orf1 len=297 frame:-2 start:5619 end:4729 gi|156553657|ref|XP_001600604.1| PREDICTED: 14-3-3 protein epsilon isoform X2 [Nasonia vitripennis]	2	4	1	16.3	33.804	1.1435e-28	184410000	13172000
>Cluster-8535.16061;orf1 len=697 frame:2 start:605 end:2695 gi|645020128|ref|XP_008207044.1| PREDICTED: Hermansky-Pudlak syndrome 1 protein homolog [Nasonia vitripennis];>Cluster-8535.16060;orf2 len=554 frame:2 start:605 end:2266 gi|645020128|ref|XP_008207044.1| PREDICTED: Hermansky-Pudlak syndrome 1 protein homolog [Nasonia vitripennis]	2	1	1	1.1	78.978	0.011513	414550000	11844000
>Cluster-8535.16062;orf1 len=665 frame:1 start:1 end:1995 gi|345480026|ref|XP_001604951.2| PREDICTED: heat shock protein 68-like [Nasonia vitripennis];>Cluster-8535.19726; len=166 start:1 end:496; minus strand	2	4	2	7.5	73.505	4.1902e-20	576780000	17478000
>Cluster-8535.16066;orf1 len=264 frame:3 start:2169 end:2960 gi|156542034|ref|XP_001601016.1| PREDICTED: peroxiredoxin 1 [Nasonia vitripennis]>gi|645030705|ref|XP_008213988.1| PREDICTED: peroxiredoxin 1 [Nasonia vitripennis]	1	7	6	39.2	29.736	2.205e-58	1148400000	67552000
>Cluster-8535.16069; len=33 start:908 end:1005; minus strand	1	1	1	28.1	3.5658	9.8806e-05	977240000	488620000
>Cluster-8535.16097;orf1 len=325 frame:-3 start:6356 end:5382 gi|645025558|ref|XP_008202088.1| PREDICTED: graves disease carrier protein-like [Nasonia vitripennis];>Cluster-8535.29702;orf1 len=234 frame:2 start:2 end:703 gi|795316054|ref|XP_011824619.1| PREDICTED: serine/threonine-protein phosphatase 2A catalytic subunit alpha isoform [Mandrillus leucophaeus]	2	1	1	3.4	37.085	0.0073138	13055000	725260
>Cluster-8535.16102;orf1 len=237 frame:-3 start:780 end:70 gi|345496829|ref|XP_003427829.1| PREDICTED: histone H1-like [Nasonia vitripennis]	1	3	2	13.6	24.339	1.5427e-07	588700000	117740000
>Cluster-8535.16103;orf1 len=471 frame:3 start:192 end:1604 gi|826441262|ref|XP_012530358.1| PREDICTED: elongation factor 1-alpha [Monomorium pharaonis];>Cluster-17172.0;orf1 len=450 frame:3 start:153 end:1502 gi|226347407|gb|ACO50114.1| elongation factor 1 alpha [Malawimonas californiana];>Cluster-8535.18312; len=296 start:1 end:885; minus strand;>Cluster-8535.29553; len=178 start:1 end:532; min…	32	12	7	37.2	51.275	3.5597e-149	6128800000	255370000
>Cluster-8535.16118;orf1 len=534 frame:3 start:426 end:2027 gi|156545944|ref|XP_001603380.1| PREDICTED: putative aminopeptidase W07G4.4 isoform X2 [Nasonia vitripennis]	1	2	2	4.3	57.51	0.0012655	24251000	757850
>Cluster-8535.16123;orf1 len=434 frame:1 start:1 end:1302 gi|345485473|ref|XP_001606111.2| PREDICTED: ovalbumin-related protein X isoform X12 [Nasonia vitripennis]>gi|645034272|ref|XP_008201841.1| PREDICTED: ovalbumin-related protein X isoform X12 [Nasonia vitripennis]	1	16	16	46.9	48.035	8.4967e-265	40308000000	1832200000
>Cluster-8535.16125;orf1 len=380 frame:-3 start:8130 end:6991 gi|645028958|ref|XP_008205614.1| PREDICTED: heterogeneous nuclear ribonucleoprotein 27C isoform X1 [Nasonia vitripennis]	1	2	2	8.7	41.145	7.405e-08	41557000	3463100
>Cluster-8535.16139;orf1 len=342 frame:-1 start:1431 end:406 gi|644995801|ref|XP_008209259.1| PREDICTED: cathepsin L-like [Nasonia vitripennis]	1	4	4	19.9	38.022	6.9613e-69	590220000	45401000
>Cluster-8535.16141;orf1 len=504 frame:3 start:177 end:1688 gi|644995705|ref|XP_008209229.1| PREDICTED: LOW QUALITY PROTEIN: probable citrate synthase 2, mitochondrial [Nasonia vitripennis];>Cluster-12376.0; len=174 start:1 end:519; minus strand	2	10	10	25.6	55.64	1.5131e-30	1065100000	39448000
>Cluster-8535.16174;orf1 len=814 frame:1 start:604 end:3045 gi|645028854|ref|XP_008204459.1| PREDICTED: venom dipeptidyl peptidase 4 isoform X1 [Nasonia vitripennis];>Cluster-8535.18660;orf1 len=814 frame:2 start:677 end:3118 gi|645028854|ref|XP_008204459.1| PREDICTED: venom dipeptidyl peptidase 4 isoform X1 [Nasonia vitripennis]	2	18	18	29.4	91.611	6.0603e-81	1429800000	29180000
>Cluster-8535.16180;orf1 len=355 frame:1 start:1 end:1065 gi|768429009|ref|XP_011555667.1| PREDICTED: 60S acidic ribosomal protein P0 [Plutella xylostella]	1	2	2	12.1	38.266	1.8719e-28	100060000	7696500
>Cluster-8535.16189;orf1 len=725 frame:-1 start:9357 end:7183 gi|724951806|ref|XP_010351937.1| PREDICTED: LOW QUALITY PROTEIN: heat shock protein HSP 90-alpha [Rhinopithecus roxellana];>Cluster-24297.0;orf1 len=725 frame:1 start:49 end:2223 gi|161899185|ref|XP_001712819.1| chaperone HSP90 [Bigelowiella natans]>gi|75756312|gb|ABA27207.1| chaperone HSP90 [Bigelowiella natans];>Cluster-4554.0;orf1 l…	4	7	3	11.5	82.887	6.4602e-19	249410000	7335500
>Cluster-8535.16202;orf1 len=496 frame:3 start:378 end:1865 gi|156552806|ref|XP_001599572.1| PREDICTED: serine--tRNA ligase, cytoplasmic [Nasonia vitripennis]	1	1	1	3.2	56.847	0.008597	0	0
>Cluster-8535.16206;orf1 len=309 frame:2 start:719 end:1645 gi|345482565|ref|XP_001608198.2| PREDICTED: neural/ectodermal development factor IMP-L2 [Nasonia vitripennis];>Cluster-8535.16207;orf1 len=309 frame:2 start:719 end:1645 gi|345482565|ref|XP_001608198.2| PREDICTED: neural/ectodermal development factor IMP-L2 [Nasonia vitripennis]	2	16	16	71.4	33.538	0	81493000000	5093300000
>Cluster-8535.16215;orf1 len=209 frame:-3 start:1023 end:397 gi|156536931|ref|XP_001608129.1| PREDICTED: 40S ribosomal protein S7 isoform X2 [Nasonia vitripennis]>gi|345479585|ref|XP_003423985.1| PREDICTED: 40S ribosomal protein S7 isoform X2 [Nasonia vitripennis]>gi|152940811|gb|ABS44870.1| ribosomal protein S7e [Pteromalus puparum]	1	1	1	13	24.012	5.0286e-06	16319000	1483600
>Cluster-8535.16225;orf1 len=248 frame:2 start:2 end:745 gi|815927583|ref|XP_012248320.1| PREDICTED: myosin regulatory light chain 2 [Bombus impatiens];>Cluster-8535.16641;orf1 len=222 frame:1 start:151 end:816 gi|815927583|ref|XP_012248320.1| PREDICTED: myosin regulatory light chain 2 [Bombus impatiens]	2	7	7	34.8	27.614	5.3058e-145	767370000	59028000
>Cluster-8535.16231;orf1 len=151 frame:3 start:393 end:845 gi|817250596|emb|CFW94149.1| Csa-calmodulin 1, partial [Cupiennius salei];>Cluster-11006.0;orf1 len=69 frame:1 start:1 end:207 gi|768349291|ref|XP_011571495.1| PREDICTED: calmodulin [Aquila chrysaetos canadensis];>Cluster-9489.0;orf1 len=195 frame:2 start:2 end:586 gi|565319319|gb|ETE70432.1| Calmodulin, partial [Ophiophagus hannah];>Clus…	27	6	6	44	16.939	3.1079e-21	471680000	52408000
>Cluster-8535.16320;orf2 len=397 frame:-2 start:6064 end:4874 gi|345484945|ref|XP_001604561.2| PREDICTED: protein croquemort-like isoform X1 [Nasonia vitripennis]	1	20	20	57.1	43.079	1.2435e-198	36988000000	1681300000
>Cluster-8535.16327;orf1 len=415 frame:3 start:150 end:1394 gi|270298178|gb|ACZ68113.1| calreticulin [Pteromalus puparum]	1	11	11	38.9	48.527	3.8927e-126	2882000000	102930000
>Cluster-8535.16331;orf1 len=285 frame:2 start:2 end:856 gi|345498311|ref|XP_001607037.2| PREDICTED: circadian clock-controlled protein-like [Nasonia vitripennis]	1	1	1	4.6	31.741	0.0018679	17667000	1104200
>Cluster-8535.16342;orf1 len=630 frame:2 start:554 end:2443 gi|345498444|ref|XP_001607440.2| PREDICTED: poly(U)-specific endoribonuclease homolog [Nasonia vitripennis]	1	1	1	2.2	66.7	0.0022079	11947000	298670
>Cluster-8535.16359;orf1 len=147 frame:3 start:192 end:632 gi|156550773|ref|XP_001605596.1| PREDICTED: small nuclear ribonucleoprotein Sm D3 [Nasonia vitripennis]	1	1	1	6.8	15.933	1.1272e-05	0	0
>Cluster-8535.16364; len=1020 start:250 end:3312; minus strand	1	3	3	4.1	115.54	2.2727e-11	110120000	2039200
>Cluster-8535.16365; len=418 start:592 end:1845; minus strand	1	2	2	6.2	47.36	0.0053128	35847000	1558500
>Cluster-8535.16405;orf1 len=658 frame:-2 start:3329 end:1356 gi|345496031|ref|XP_003427627.1| PREDICTED: transcriptional regulator DEF1-like [Nasonia vitripennis]	1	1	1	2.3	74.871	0.0070806	8071400	196860
>Cluster-8535.16451;orf1 len=675 frame:-1 start:3006 end:982 gi|645012847|ref|XP_001604460.2| PREDICTED: heat shock 70 kDa protein cognate 3 isoform X2 [Nasonia vitripennis];>Cluster-12277.0; len=189 start:1 end:567; minus strand;>Cluster-8535.253;orf1 len=180 frame:2 start:2 end:541 gi|30962014|gb|AAP37959.1| heat shock protein 70 [Gallus gallus]>gi|30962016|gb|AAP37960.1| heat shock protein 70 …	3	10	6	17.8	74.55	2.0225e-69	489220000	15288000
>Cluster-8535.16468;orf1 len=441 frame:-2 start:2084 end:762 gi|766921830|ref|XP_011505450.1| PREDICTED: glutamine synthetase 2 cytoplasmic-like [Ceratosolen solmsi marchali]	1	5	4	13.2	48.826	9.8127e-10	127180000	5780700
>Cluster-8535.16512;orf2 len=556 frame:-2 start:4226 end:2559 gi|645000459|ref|XP_008215991.1| PREDICTED: T-complex protein 1 subunit theta [Nasonia vitripennis];>Cluster-8535.20680;orf2 len=556 frame:-2 start:4307 end:2640 gi|645000459|ref|XP_008215991.1| PREDICTED: T-complex protein 1 subunit theta [Nasonia vitripennis]	2	2	2	4.9	60.216	4.0419e-06	21711000	586780
>Cluster-8535.16517;orf1 len=450 frame:-3 start:2390 end:1041 gi|345484059|ref|XP_003424938.1| PREDICTED: pancreatic triacylglycerol lipase-like [Nasonia vitripennis];>Cluster-8535.19470;orf1 len=499 frame:1 start:1 end:1497 gi|345478840|ref|XP_001599044.2| PREDICTED: exosome component 10 [Nasonia vitripennis];>Cluster-8535.24049;orf1 len=470 frame:1 start:337 end:1746 gi|645024165|ref|XP_0082129…	3	12	11	39.4	50.446	1.6642e-206	5534000000	263520000
>Cluster-8535.16562;orf1 len=402 frame:-1 start:1291 end:86 gi|345498278|ref|XP_001606746.2| PREDICTED: venom metalloproteinase 2-like [Nasonia vitripennis];>Cluster-8535.5971;orf2 len=148 frame:-3 start:890 end:447 gi|345498278|ref|XP_001606746.2| PREDICTED: venom metalloproteinase 2-like [Nasonia vitripennis];>Cluster-8535.5971;orf1 len=126 frame:-1 start:463 end:86 gi|345498278|ref|XP_00160674…	3	13	13	27.2	46.081	3.3076e-50	5110200000	243340000
>Cluster-8535.16578;orf1 len=295 frame:-1 start:2362 end:1478 gi|645002938|ref|XP_008208069.1| PREDICTED: ras-related protein Rab-5B isoform X1 [Nasonia vitripennis]>gi|645002940|ref|XP_008208070.1| PREDICTED: ras-related protein Rab-5B isoform X1 [Nasonia vitripennis]>gi|645002942|ref|XP_008208071.1| PREDICTED: ras-related protein Rab-5B isoform X1 [Nasonia vitripennis];>Cluster-8535.18444;orf1 …	7	2	2	8.5	32.181	6.1802e-12	15823000	1054800
>Cluster-8535.9073;orf1 len=607 frame:3 start:156 end:1976 gi|645028397|ref|XP_008208380.1| PREDICTED: xaa-Pro dipeptidase [Nasonia vitripennis];>Cluster-8535.8889;orf1 len=509 frame:3 start:2487 end:4013 gi|645028397|ref|XP_008208380.1| PREDICTED: xaa-Pro dipeptidase [Nasonia vitripennis];>Cluster-8535.9211;orf1 len=509 frame:2 start:2324 end:3850 gi|645028397|ref|XP_008208380.1| PREDICTED: xaa-…	6	2	2	3.3	66.764	0.00061459	7900200	292600
>Cluster-8535.16655;orf1 len=223 frame:-1 start:721 end:53 gi|156547512|ref|XP_001604111.1| PREDICTED: 40S ribosomal protein S8 [Nasonia vitripennis];>Cluster-22663.0;orf1 len=211 frame:1 start:1 end:633 gi|733901649|ref|XP_010714500.1| PREDICTED: 40S ribosomal protein S8 [Meleagris gallopavo];>Cluster-15031.1; len=130 start:42 end:429; minus strand	3	2	1	8.1	25.445	0.00030972	0	0
>Cluster-8535.16709;orf1 len=172 frame:1 start:1816 end:2331 gi|156545934|ref|XP_001601182.1| PREDICTED: general odorant-binding protein 28a [Nasonia vitripennis]>gi|355389925|emb|CCD17795.1| putative odorant binding protein 26 [Nasonia vitripennis]	1	6	6	39.2	18.443	5.5027e-30	4900500000	490050000
>Cluster-8535.16859;orf1 len=205 frame:-2 start:2163 end:1549 gi|345483318|ref|XP_001602615.2| PREDICTED: peptidyl-prolyl cis-trans isomerase B-like [Nasonia vitripennis];>Cluster-8535.19037; len=121 start:195 end:556; minus strand	2	1	1	4.9	22.085	0.0042389	37942000	3794200
>Cluster-8535.16878;orf1 len=292 frame:-1 start:1330 end:455 gi|645007082|ref|XP_001605658.3| PREDICTED: chymotrypsin-2 [Nasonia vitripennis];>Cluster-8535.25138;orf1 len=292 frame:-3 start:1330 end:455 gi|645007082|ref|XP_001605658.3| PREDICTED: chymotrypsin-2 [Nasonia vitripennis]	2	15	7	52.9	32.627	1.3113e-107	2258200000	118850000
>Cluster-8535.16878;orf2 len=270 frame:-2 start:3243 end:2434 gi|645007082|ref|XP_001605658.3| PREDICTED: chymotrypsin-2 [Nasonia vitripennis];>Cluster-8535.25138;orf2 len=270 frame:-1 start:3243 end:2434 gi|645007082|ref|XP_001605658.3| PREDICTED: chymotrypsin-2 [Nasonia vitripennis]	2	15	10	55.4	29.89	2.529e-110	13274000000	737420000
>Cluster-8535.16916;orf1 len=272 frame:3 start:42 end:857 gi|345498058|ref|XP_001604439.2| PREDICTED: uncharacterized protein LOC100120839 [Nasonia vitripennis]	1	6	6	20.7	31.276	5.0067e-15	420540000	23364000
>Cluster-8535.16931;orf1 len=168 frame:3 start:3 end:506 gi|645004598|ref|XP_008209965.1| PREDICTED: 40S ribosomal protein S12 isoform X1 [Nasonia vitripennis];>Cluster-11476.0;orf1 len=158 frame:3 start:75 end:548 gi|817182939|ref|XP_012273708.1| PREDICTED: 40S ribosomal protein S12 isoform X1 [Orussus abietinus]	2	3	3	20.4	18.23	3.0207e-32	388960000	38896000
>Cluster-8535.16965;orf1 len=160 frame:3 start:231 end:710 gi|156542763|ref|XP_001602492.1| PREDICTED: cofilin/actin-depolymerizing factor homolog [Nasonia vitripennis];>Cluster-11675.0;orf1 len=150 frame:-3 start:469 end:20 gi|506965820|gb|AGM32262.1| actin-depolymerizing factor 1 [Coptotermes formosanus]	2	7	7	57.2	17.884	1.5572e-51	922140000	83831000
>Cluster-8535.16971;orf1 len=107 frame:1 start:118 end:438 gi|288856333|ref|NP_001165817.1| ATP synthase-coupling factor 6, mitochondrial [Nasonia vitripennis]	1	1	1	11.3	11.883	0.00093648	34486000	4926500
>Cluster-8535.17059;orf1 len=126 frame:3 start:1197 end:1574 gi|345482231|ref|XP_003424551.1| PREDICTED: uncharacterized protein LOC100680008 [Nasonia vitripennis]>gi|645037224|ref|XP_008217203.1| PREDICTED: uncharacterized protein LOC100680008 [Nasonia vitripennis]	1	2	2	25.6	13.421	1.0219e-86	5203800000	743390000
>Cluster-8535.17060;orf1 len=131 frame:-3 start:1455 end:1063 gi|801371469|ref|XP_012062422.1| PREDICTED: protein translation factor SUI1 homolog, partial [Atta cephalotes]	1	2	2	22.3	14.759	0.00103	33334000	4761900
>Cluster-8535.17144;orf1 len=387 frame:2 start:707 end:1867 gi|156539529|ref|XP_001599066.1| PREDICTED: probable isocitrate dehydrogenase [NAD] subunit alpha, mitochondrial [Nasonia vitripennis]	1	12	12	38.9	42.642	1.5422e-45	1264300000	66540000
>Cluster-8535.17154; len=341 start:261 end:1283; minus strand	1	6	6	23.8	38.255	5.1492e-22	362620000	20146000
>Cluster-8535.17201;orf1 len=358 frame:3 start:183 end:1256 gi|156542373|ref|XP_001602406.1| PREDICTED: 1,5-anhydro-D-fructose reductase-like isoform X1 [Nasonia vitripennis];>Cluster-19540.0;orf1 len=374 frame:2 start:44 end:1165 gi|156538066|ref|XP_001607479.1| PREDICTED: alcohol dehydrogenase [NADP(+)]-like [Nasonia vitripennis];>Cluster-21370.3;orf1 len=369 frame:2 start:101 end:1207 gi|64502…	10	11	11	43.1	40.071	1.0029e-88	799760000	36353000
>Cluster-8535.17234;orf1 len=1468 frame:3 start:534 end:4937 gi|645006304|ref|XP_008204417.1| PREDICTED: microtubule-associated protein futsch-like [Nasonia vitripennis];>Cluster-8535.23011;orf1 len=813 frame:1 start:190 end:2628 gi|645006304|ref|XP_008204417.1| PREDICTED: microtubule-associated protein futsch-like [Nasonia vitripennis]	2	10	1	8	164.79	2.0176e-50	517530000	6017800
>Cluster-8535.17298; len=2194 start:1244 end:7822; minus strand	1	1	1	0.9	238.17	1.0979e-08	40698000	415290
>Cluster-8535.17305;orf1 len=375 frame:-3 start:2362 end:1238 gi|644999950|ref|XP_008215781.1| PREDICTED: probable aconitate hydratase, mitochondrial isoform X1 [Nasonia vitripennis];>Cluster-17809.0; len=224 start:1 end:672; minus strand	2	11	11	41.7	40.887	2.3552e-178	1900500000	95024000
>Cluster-8535.17305;orf2 len=482 frame:-2 start:3614 end:2169 gi|644999950|ref|XP_008215781.1| PREDICTED: probable aconitate hydratase, mitochondrial isoform X1 [Nasonia vitripennis];>Cluster-16844.0; len=291 start:1 end:873; minus strand;>Cluster-17809.2; len=268 start:1 end:801; minus strand	3	10	10	29.5	51.892	1.9608e-82	1539600000	81032000
>Cluster-8535.17324;orf1 len=498 frame:-1 start:2705 end:1212 gi|156553206|ref|XP_001599732.1| PREDICTED: protein disulfide-isomerase A3 [Nasonia vitripennis]	1	10	10	25.4	56.382	1.5901e-60	770410000	28534000
>Cluster-8535.17356;orf1 len=727 frame:3 start:240 end:2420 gi|766942089|ref|XP_011503696.1| PREDICTED: epidermal growth factor receptor substrate 15-like 1 [Ceratosolen solmsi marchali]	1	1	1	2.2	81.392	0.012533	11895000	290110
>Cluster-8535.17383;orf1 len=598 frame:2 start:32 end:1825 gi|766935922|ref|XP_011500347.1| PREDICTED: protein ROP [Ceratosolen solmsi marchali]	1	1	1	2.7	68.243	0.0014217	10329000	279150
>Cluster-8535.17403;orf1 len=268 frame:1 start:1 end:804 gi|156553655|ref|XP_001600547.1| PREDICTED: malate dehydrogenase, mitochondrial [Nasonia vitripennis]>gi|645011541|ref|XP_008214295.1| PREDICTED: malate dehydrogenase, mitochondrial [Nasonia vitripennis]>gi|645011543|ref|XP_008214296.1| PREDICTED: malate dehydrogenase, mitochondrial [Nasonia vitripennis];REV__>Cluster-8535.17403;orf1 len=26…	2	12	12	53.2	28.204	1.8836e-66	2690300000	158250000
>Cluster-8535.17409;orf1 len=206 frame:-1 start:904 end:287 gi|156548617|ref|XP_001608151.1| PREDICTED: adenylate kinase isoenzyme 1 [Nasonia vitripennis]>gi|644992878|ref|XP_008203030.1| PREDICTED: adenylate kinase isoenzyme 1 [Nasonia vitripennis]	1	4	4	22.9	22.462	9.0463e-11	211830000	15131000
>Cluster-8535.17451;orf1 len=266 frame:2 start:62 end:859 gi|340720134|ref|XP_003398498.1| PREDICTED: 40S ribosomal protein S4 isoform X1 [Bombus terrestris]>gi|340720136|ref|XP_003398499.1| PREDICTED: 40S ribosomal protein S4 isoform X2 [Bombus terrestris]>gi|350408329|ref|XP_003488370.1| PREDICTED: 40S ribosomal protein S4 isoform X2 [Bombus impatiens]>gi|350408333|ref|XP_003488371.1| PREDICTED…	2	2	2	8.7	29.905	3.4508e-05	35240000	2202500
>Cluster-8535.29590; len=141 start:36 end:456; minus strand;>Cluster-8535.592; len=141 start:36 end:456; minus strand;>Cluster-8535.17473; len=130 start:71 end:458; minus strand	3	1	1	5	16.14	0.011723	52921000	10584000
>Cluster-8535.20059;orf2 len=659 frame:2 start:395 end:2371 gi|345495717|ref|XP_001606306.2| PREDICTED: nucleolar and coiled-body phosphoprotein 1 isoform X2 [Nasonia vitripennis];>Cluster-8535.17486;orf2 len=401 frame:2 start:395 end:1597 gi|345495717|ref|XP_001606306.2| PREDICTED: nucleolar and coiled-body phosphoprotein 1 isoform X2 [Nasonia vitripennis]	2	3	3	7.3	74.048	1.9641e-16	51032000	2126300
>Cluster-8535.17557;orf1 len=492 frame:-2 start:3044 end:1569 gi|766930895|ref|XP_011497603.1| PREDICTED: LOW QUALITY PROTEIN: bleomycin hydrolase [Ceratosolen solmsi marchali]	1	5	5	12.4	55.963	2.233e-145	309650000	9988800
>Cluster-8535.17565;orf1 len=179 frame:-2 start:1015 end:479 gi|766918429|ref|XP_011498299.1| PREDICTED: myosin light chain alkali isoform X2 [Ceratosolen solmsi marchali]	1	7	7	52.8	19.973	1.315e-193	2313900000	257100000
>Cluster-8535.17608;orf1 len=407 frame:1 start:883 end:2103 gi|817052889|ref|XP_012258965.1| PREDICTED: probable pyruvate dehydrogenase E1 component subunit alpha, mitochondrial [Athalia rosae]	1	5	5	19.7	45.084	2.3503e-11	185310000	8056900
>Cluster-8535.17668;orf1 len=3639 frame:3 start:3 end:10919 gi|644997257|ref|XP_008212277.1| PREDICTED: titin isoform X1 [Nasonia vitripennis];>Cluster-8535.21059;orf1 len=3200 frame:3 start:3 end:9602 gi|644997257|ref|XP_008212277.1| PREDICTED: titin isoform X1 [Nasonia vitripennis];>Cluster-8535.17662;orf1 len=4737 frame:3 start:3 end:14213 gi|817221803|ref|XP_012286350.1| PREDICTED: titin isof…	3	41	41	16.1	411.56	9.3454e-256	2941600000	13618000
>Cluster-8535.17690;orf1 len=207 frame:-2 start:1574 end:954 gi|156545575|ref|XP_001607669.1| PREDICTED: heat shock protein beta-6 isoform X2 [Nasonia vitripennis]>gi|226442061|gb|ACO57620.1| small heat shock protein [Pteromalus puparum]>gi|343488866|gb|AEM45800.1| small heat shock protein [Pteromalus puparum];>Cluster-8535.17689;orf1 len=247 frame:-2 start:1694 end:954 gi|645013101|ref|XP_008216…	2	6	6	51	23.537	5.817e-28	2485400000	355060000
>Cluster-8535.17703;orf1 len=263 frame:3 start:3 end:791 gi|766920745|ref|XP_011504859.1| PREDICTED: V-type proton ATPase subunit D [Ceratosolen solmsi marchali]	1	1	1	6.1	29.506	1.437e-08	21925000	1566100
>Cluster-8535.17714;orf2 len=443 frame:3 start:2523 end:3851 gi|156538006|ref|XP_001608202.1| PREDICTED: nucleolar protein 11 isoform X1 [Nasonia vitripennis]>gi|645000510|ref|XP_008216012.1| PREDICTED: nucleolar protein 11 isoform X1 [Nasonia vitripennis];>Cluster-8535.20538;orf2 len=443 frame:3 start:2769 end:4097 gi|288856313|ref|NP_001165809.1| cytochrome b-c1 complex subunit 2, mitochondrial…	4	1	1	5	47.527	1.4885e-11	0	0
>Cluster-8535.17729;orf1 len=648 frame:-1 start:3443 end:1500 gi|345494826|ref|XP_001603682.2| PREDICTED: dihydropyrimidinase isoform X1 [Nasonia vitripennis];>Cluster-8535.16029;orf2 len=362 frame:-2 start:6131 end:5046 gi|645011775|ref|XP_008210684.1| PREDICTED: dihydropyrimidinase isoform X2 [Nasonia vitripennis];>Cluster-8535.16029;orf1 len=415 frame:-1 start:2742 end:1498 gi|645011775|ref|XP…	3	6	6	12.5	70.566	3.6431e-14	118230000	3694800
>Cluster-8535.17740;orf1 len=1092 frame:-1 start:4203 end:928 gi|345485396|ref|XP_003425261.1| PREDICTED: ATP-citrate synthase [Nasonia vitripennis]>gi|645033961|ref|XP_008201758.1| PREDICTED: ATP-citrate synthase [Nasonia vitripennis];>Cluster-8535.21421;orf1 len=1092 frame:-2 start:4203 end:928 gi|345485396|ref|XP_003425261.1| PREDICTED: ATP-citrate synthase [Nasonia vitripennis]>gi|645033961|r…	2	2	2	3.1	120.04	1.6339e-05	0	0
>Cluster-8535.17747;orf1 len=577 frame:-1 start:2872 end:1142 gi|766933454|ref|XP_011498999.1| PREDICTED: protein disulfide-isomerase [Ceratosolen solmsi marchali]	1	19	19	39.1	64.803	7.1001e-92	1673800000	45237000
>Cluster-8535.17769;orf1 len=423 frame:1 start:310 end:1578 gi|238859549|ref|NP_001154979.1| major royal jelly protein-like 5 precursor [Nasonia vitripennis]	1	3	3	9	48.112	1.3409e-10	26577000	1063100
>Cluster-8535.17852; len=253 start:396 end:1151; minus strand	1	8	8	39.9	26.387	5.4212e-50	1084000000	67751000
>Cluster-8535.17856;orf1 len=1683 frame:2 start:206 end:5254 gi|645035636|ref|XP_008216783.1| PREDICTED: serine/arginine repetitive matrix protein 2 isoform X2 [Nasonia vitripennis];>Cluster-8535.17858;orf2 len=1450 frame:2 start:206 end:4555 gi|645035643|ref|XP_008216786.1| PREDICTED: serine/arginine repetitive matrix protein 2 isoform X5 [Nasonia vitripennis];>Cluster-8535.20346;orf1 len=1267 f…	3	2	2	2.1	187.9	2.1785e-06	25671000	298500
>Cluster-8535.17874;orf2 len=82 frame:2 start:2 end:247 gi|645013610|ref|XP_008205185.1| PREDICTED: cytochrome b5 domain-containing protein 1 isoform X1 [Nasonia vitripennis]>gi|645013612|ref|XP_008205186.1| PREDICTED: cytochrome b5 domain-containing protein 1 isoform X1 [Nasonia vitripennis]	1	4	4	49.4	8.6179	1.3793e-28	3138700000	784670000
>Cluster-8535.17900;orf1 len=326 frame:2 start:1925 end:2902 gi|345485911|ref|XP_001604204.2| PREDICTED: 1,5-anhydro-D-fructose reductase-like [Nasonia vitripennis]	1	3	3	11.4	36.924	4.6793e-07	24871000	1036300
>Cluster-8535.17900;orf2 len=332 frame:3 start:243 end:1238 gi|345485911|ref|XP_001604204.2| PREDICTED: 1,5-anhydro-D-fructose reductase-like [Nasonia vitripennis]	1	3	3	11.2	37.318	1.226e-08	95327000	3813100
>Cluster-8535.17992;orf2 len=613 frame:-3 start:5737 end:3899 gi|645012496|ref|XP_008207833.1| PREDICTED: serine/threonine-protein kinase PAK 1 [Nasonia vitripennis]>gi|645012498|ref|XP_008207834.1| PREDICTED: serine/threonine-protein kinase PAK 1 [Nasonia vitripennis]>gi|645012500|ref|XP_008207835.1| PREDICTED: serine/threonine-protein kinase PAK 1 [Nasonia vitripennis]>gi|645012502|ref|XP_00820…	1	9	9	24	65.554	1.6188e-75	310230000	10698000
>Cluster-8535.18009;orf1 len=274 frame:1 start:19 end:840 gi|156546214|ref|XP_001604558.1| PREDICTED: uncharacterized protein LOC100120966 [Nasonia vitripennis]>gi|355389965|emb|CCD17815.1| putative odorant binding protein 46 [Nasonia vitripennis]	1	6	6	27.5	30.709	2.4549e-16	252890000	13310000
>Cluster-8535.18098;orf1 len=479 frame:-2 start:1900 end:464 gi|645028980|ref|XP_008205620.1| PREDICTED: flavin-containing monooxygenase FMO GS-OX-like 2 [Nasonia vitripennis]	1	5	5	16.5	54.313	1.1409e-26	205200000	9327200
>Cluster-8535.18122;orf1 len=292 frame:-2 start:4597 end:3722 gi|645031700|ref|XP_008214535.1| PREDICTED: tropomyosin 1 isoform X7 [Nasonia vitripennis];>Cluster-8535.17488;orf2 len=201 frame:-2 start:7014 end:6412 gi|645031691|ref|XP_008214532.1| PREDICTED: tropomyosin 1 isoform X5 [Nasonia vitripennis]>gi|645031694|ref|XP_008214533.1| PREDICTED: tropomyosin 1 isoform X5 [Nasonia vitripennis];>C…	9	11	3	34.4	33.429	1.3094e-124	13834000000	813750000
>Cluster-8535.182; len=80 start:1 end:240; minus strand	1	1	1	18.8	9.0062	0.0025529	12041000	2408100
>Cluster-8535.18248;orf1 len=228 frame:3 start:3 end:686 gi|645028683|ref|XP_001601497.2| PREDICTED: uncharacterized protein LOC100113667 [Nasonia vitripennis]	1	1	1	4.8	25.851	0.00055979	0	0
>Cluster-8535.18263;orf1 len=155 frame:-1 start:717 end:253 gi|156549557|ref|XP_001606346.1| PREDICTED: general odorant-binding protein 56d [Nasonia vitripennis]>gi|355390003|emb|CCD17834.1| putative odorant binding protein 65 [Nasonia vitripennis]	1	2	2	17.5	16.851	2.1253e-10	168170000	18685000
>Cluster-8535.18266;orf1 len=443 frame:3 start:474 end:1802 gi|345486851|ref|XP_003425569.1| PREDICTED: protein yellow [Nasonia vitripennis]	1	2	2	6.8	49.297	2.2307e-05	14109000	671840
>Cluster-8535.18349;orf1 len=300 frame:2 start:2405 end:3304 gi|345497874|ref|XP_001607430.2| PREDICTED: proteasome subunit alpha type-5 [Nasonia vitripennis]>gi|645032723|ref|XP_008214807.1| PREDICTED: proteasome subunit alpha type-5 [Nasonia vitripennis];>Cluster-8535.18351;orf2 len=300 frame:3 start:2373 end:3272 gi|645033511|ref|XP_008214999.1| PREDICTED: ataxin-10 [Nasonia vitripennis]	2	1	1	6.4	33.136	2.0061e-31	0	0
>Cluster-8535.18369;orf1 len=127 frame:3 start:54 end:434 gi|156536941|ref|XP_001608227.1| PREDICTED: histone H2A-like [Nasonia vitripennis]>gi|156538961|ref|XP_001599641.1| PREDICTED: histone H2A-like [Nasonia vitripennis]>gi|156538967|ref|XP_001599883.1| PREDICTED: histone H2A-like [Nasonia vitripennis]>gi|156539625|ref|XP_001599199.1| PREDICTED: histone H2A-like [Nasonia vitripennis]>gi|156544…	3	3	1	31	13.539	6.4472e-10	867140000	173430000
>Cluster-8535.18461;orf1 len=459 frame:-1 start:2176 end:800 gi|766932609|ref|XP_011498533.1| PREDICTED: obg-like ATPase 1 [Ceratosolen solmsi marchali];>Cluster-8535.23528;orf1 len=459 frame:-1 start:2176 end:800 gi|766932609|ref|XP_011498533.1| PREDICTED: obg-like ATPase 1 [Ceratosolen solmsi marchali]	2	1	1	3.3	51.941	5.991e-06	14548000	501670
>Cluster-8535.18465;orf1 len=841 frame:3 start:900 end:3422 gi|795096911|ref|XP_011880335.1| PREDICTED: twitchin isoform X30 [Vollenhovia emeryi]	1	12	12	18.2	95.021	5.5215e-83	845860000	20139000
>Cluster-8535.18631;orf1 len=163 frame:3 start:102 end:590 gi|156546014|ref|XP_001607976.1| PREDICTED: eukaryotic translation initiation factor 5A [Nasonia vitripennis]>gi|156546016|ref|XP_001607974.1| PREDICTED: eukaryotic translation initiation factor 5A [Nasonia vitripennis]>gi|156546018|ref|XP_001607980.1| PREDICTED: eukaryotic translation initiation factor 5A [Nasonia vitripennis]>gi|3454983…	1	2	2	17.9	17.894	0.00010066	54056000	4914100
>Cluster-8535.18669;orf1 len=157 frame:-2 start:646 end:176 gi|645009913|ref|XP_008213360.1| PREDICTED: probable salivary secreted peptide [Nasonia vitripennis]	1	2	2	12.2	17.1	9.1452e-08	125670000	12567000
>Cluster-8535.18710;orf1 len=431 frame:2 start:386 end:1678 gi|156552444|ref|XP_001600953.1| PREDICTED: uncharacterized protein LOC100116463 [Nasonia vitripennis];>Cluster-8535.19238;orf1 len=431 frame:2 start:386 end:1678 gi|645012349|ref|XP_008207767.1| PREDICTED: uncharacterized protein LOC103316332 [Nasonia vitripennis];>Cluster-8535.21783;orf1 len=431 frame:2 start:386 end:1678 gi|156552444|…	3	1	1	2.8	49.885	0.0007266	12789000	491890
>Cluster-8535.18791;orf1 len=217 frame:2 start:2 end:652 gi|156536860|ref|XP_001604071.1| PREDICTED: uncharacterized protein LOC100113619 [Nasonia vitripennis];>Cluster-11715.0;orf1 len=172 frame:-2 start:583 end:68 gi|755927928|ref|XP_011305852.1| PREDICTED: uncharacterized protein LOC105268204 [Fopius arisanus];>Cluster-9862.0;orf1 len=165 frame:-3 start:514 end:20 gi|242012283|ref|XP_002426862…	3	4	4	28.2	23.325	8.3445e-13	424000000	35333000
>Cluster-8535.18827;orf1 len=388 frame:-3 start:1164 end:1 gi|645015625|ref|XP_008206539.1| PREDICTED: troponin T, skeletal muscle [Nasonia vitripennis];>Cluster-8535.21647;orf1 len=376 frame:-1 start:1128 end:1 gi|645015625|ref|XP_008206539.1| PREDICTED: troponin T, skeletal muscle [Nasonia vitripennis];>Cluster-11943.0;orf1 len=369 frame:1 start:103 end:1209 gi|501300532|dbj|BAN21617.1| troponi…	3	13	1	26	46.236	5.9152e-58	504150000	33610000
>Cluster-8535.18859; len=1367 start:1 end:4099; minus strand	1	7	1	6.7	154.01	1.137e-16	573620000	8194600
>Cluster-8535.18876;orf1 len=469 frame:3 start:1260 end:2666 gi|345484421|ref|XP_003425032.1| PREDICTED: pancreatic triacylglycerol lipase-like [Nasonia vitripennis];>Cluster-8535.22610;orf1 len=469 frame:3 start:1260 end:2666 gi|345484421|ref|XP_003425032.1| PREDICTED: pancreatic triacylglycerol lipase-like [Nasonia vitripennis]	2	8	8	26.7	52.452	7.2136e-91	776310000	38815000
>Cluster-8535.18901;orf1 len=336 frame:-1 start:1599 end:592 gi|156547023|ref|XP_001600966.1| PREDICTED: chloride intracellular channel exc-4 [Nasonia vitripennis]	1	1	1	3.6	38.13	0.00027634	17029000	946040
>Cluster-8535.18928;orf1 len=331 frame:2 start:494 end:1486 gi|229606086|ref|NP_001153452.1| lipid storage droplet 2 [Nasonia vitripennis]	1	4	4	17.6	36.405	2.3547e-38	296240000	16458000
>Cluster-8535.18952;orf1 len=1578 frame:2 start:146 end:4879 gi|645003782|ref|XP_008212695.1| PREDICTED: myosin heavy chain, muscle isoform X1 [Nasonia vitripennis]>gi|645003784|ref|XP_008212696.1| PREDICTED: myosin heavy chain, muscle isoform X1 [Nasonia vitripennis];>Cluster-8535.17153;orf1 len=1434 frame:2 start:1832 end:6133 gi|645003794|ref|XP_008212702.1| PREDICTED: myosin heavy chain, musc…	14	26	26	19.6	181.58	0	944530000	10379000
>Cluster-8535.19096; len=247 start:1 end:739; minus strand;>Cluster-8535.19098; len=126 start:362 end:739; minus strand	2	2	2	10.9	28.621	9.7868e-10	49481000	4948100
>Cluster-8535.19105; len=207 start:1 end:619; minus strand;>Cluster-8535.20291; len=136 start:1 end:405; minus strand;>Cluster-8535.20485; len=97 start:1 end:292; minus strand;>Cluster-8535.19097; len=84 start:1 end:248; minus strand	4	4	3	21.3	23.121	1.0933e-37	474330000	36487000
>Cluster-8535.19979;orf1 len=435 frame:2 start:2 end:1306 gi|817189209|ref|XP_012289204.1| PREDICTED: alpha-tocopherol transfer protein-like isoform X2 [Orussus abietinus];>Cluster-8535.19186;orf1 len=358 frame:2 start:2 end:1075 gi|817189207|ref|XP_012289203.1| PREDICTED: alpha-tocopherol transfer protein-like isoform X1 [Orussus abietinus];>Cluster-8535.19187; len=203 start:155 end:762; minus s…	3	2	2	5.5	49.888	0.00025312	13511000	675530
>Cluster-8535.19264;orf1 len=315 frame:2 start:200 end:1144 gi|644995588|ref|XP_008208882.1| PREDICTED: 27 kDa hemolymph protein [Nasonia vitripennis]	1	5	5	15.9	34.206	6.929e-13	243700000	14335000
>Cluster-8535.19326;orf1 len=359 frame:1 start:67 end:1143 gi|645011633|ref|XP_008214331.1| PREDICTED: UPF0764 protein C16orf89 homolog [Nasonia vitripennis]	1	7	7	22.6	41.244	1.5354e-60	1742400000	145200000
>Cluster-8535.19461;orf1 len=1000 frame:-1 start:4002 end:1003 gi|644999910|ref|XP_008215764.1| PREDICTED: vinculin [Nasonia vitripennis];>Cluster-8535.23337;orf1 len=974 frame:-1 start:3924 end:1003 gi|644999910|ref|XP_008215764.1| PREDICTED: vinculin [Nasonia vitripennis]	2	7	7	10.3	109.98	6.2258e-69	164250000	2783900
>Cluster-8535.19493;orf1 len=193 frame:-3 start:1434 end:856 gi|268607528|ref|NP_001161334.1| cuticular protein RR-1 family member 19 precursor [Nasonia vitripennis]	1	1	1	13	20.38	3.4878e-10	256920000	51383000
>Cluster-8535.19517;orf1 len=352 frame:1 start:136 end:1191 gi|156554575|ref|XP_001601415.1| PREDICTED: D-arabinitol dehydrogenase 1-like [Nasonia vitripennis]>gi|644995739|ref|XP_008209240.1| PREDICTED: D-arabinitol dehydrogenase 1-like [Nasonia vitripennis];>Cluster-8535.20856;orf1 len=352 frame:1 start:136 end:1191 gi|156554575|ref|XP_001601415.1| PREDICTED: D-arabinitol dehydrogenase 1-like […	2	1	1	6	38.236	0.0015782	16178000	1011100
>Cluster-8535.19517;orf2 len=402 frame:-2 start:3043 end:1838 gi|156554575|ref|XP_001601415.1| PREDICTED: D-arabinitol dehydrogenase 1-like [Nasonia vitripennis]>gi|644995739|ref|XP_008209240.1| PREDICTED: D-arabinitol dehydrogenase 1-like [Nasonia vitripennis];>Cluster-8535.20856;orf2 len=432 frame:-3 start:3133 end:1838 gi|156554575|ref|XP_001601415.1| PREDICTED: D-arabinitol dehydrogenase 1-li…	2	2	2	9.2	44.808	2.3324e-08	30123000	1506100
>Cluster-8535.8145;orf1 len=1672 frame:-1 start:5745 end:730 gi|645002040|ref|XP_008209802.1| PREDICTED: restin homolog isoform X1 [Nasonia vitripennis]>gi|645002042|ref|XP_008209803.1| PREDICTED: restin homolog isoform X1 [Nasonia vitripennis]>gi|645002044|ref|XP_008209804.1| PREDICTED: restin homolog isoform X1 [Nasonia vitripennis]>gi|645002046|ref|XP_008209805.1| PREDICTED: restin homolog iso…	16	1	1	1	191.74	1.7461e-08	72759000	720380
>Cluster-8535.19667;orf1 len=151 frame:1 start:1 end:453 gi|766928150|ref|XP_011496103.1| PREDICTED: titin-like [Ceratosolen solmsi marchali]	1	3	3	27.8	17.418	1.8596e-32	425430000	85086000
>Cluster-8535.19787;orf1 len=139 frame:-2 start:1189 end:773 gi|571576852|ref|XP_006571871.1| PREDICTED: crustacean hyperglycemic hormones isoform X2 [Apis mellifera]>gi|571576854|ref|XP_006571872.1| PREDICTED: crustacean hyperglycemic hormones isoform X3 [Apis mellifera]>gi|571576856|ref|XP_006571873.1| PREDICTED: crustacean hyperglycemic hormones isoform X4 [Apis mellifera]	1	7	7	47.8	15.368	4.8757e-22	1648000000	274660000
>Cluster-8535.19793; len=160 start:569 end:1046; minus strand;>Cluster-8535.15052;orf1 len=171 frame:-2 start:1081 end:569 gi|751224336|ref|XP_011165502.1| PREDICTED: tropomyosin isoform X11 [Solenopsis invicta];>Cluster-11398.0; len=120 start:232 end:591; minus strand	3	9	0	37.1	18.476	8.016e-32	1644900000	164490000
>Cluster-8535.19867;orf1 len=898 frame:-3 start:5506 end:2813 gi|808134621|ref|XP_012169761.1| PREDICTED: alpha-actinin, sarcomeric isoform X2 [Bombus terrestris];>Cluster-8535.18982;orf2 len=695 frame:-2 start:4897 end:2813 gi|808134621|ref|XP_012169761.1| PREDICTED: alpha-actinin, sarcomeric isoform X2 [Bombus terrestris];>Cluster-8535.19678;orf1 len=695 frame:-3 start:4897 end:2813 gi|80813462…	6	31	27	42.5	103.62	6.1748e-226	3224400000	50382000
>Cluster-8535.19909;orf1 len=770 frame:1 start:325 end:2634 gi|749799852|ref|XP_011153490.1| PREDICTED: angiotensin-converting enzyme [Harpegnathos saltator]	1	1	1	1.4	89.485	0.0028376	8046200	229890
>Cluster-8535.20005;orf1 len=1201 frame:1 start:217 end:3819 gi|156540073|ref|XP_001600219.1| PREDICTED: pyruvate carboxylase, mitochondrial isoform X1 [Nasonia vitripennis]>gi|345495988|ref|XP_003427614.1| PREDICTED: pyruvate carboxylase, mitochondrial isoform X1 [Nasonia vitripennis]>gi|645027556|ref|XP_008211776.1| PREDICTED: pyruvate carboxylase, mitochondrial isoform X1 [Nasonia vitripennis]…	3	3	3	3.3	133.04	3.1186e-06	68369000	1035900
>Cluster-8535.20007;orf1 len=299 frame:1 start:295 end:1191 gi|288856343|ref|NP_001165822.1| ATP synthase subunit gamma, mitochondrial [Nasonia vitripennis]>gi|645028342|ref|XP_008208355.1| PREDICTED: ATP synthase subunit gamma, mitochondrial isoform X1 [Nasonia vitripennis];>Cluster-8535.20008;orf1 len=299 frame:3 start:192 end:1088 gi|288856343|ref|NP_001165822.1| ATP synthase subunit gamma, mi…	4	9	9	31.9	32.797	5.7486e-49	1619100000	89948000
>Cluster-8535.20023;orf1 len=259 frame:3 start:852 end:1628 gi|345489260|ref|XP_003426083.1| PREDICTED: uncharacterized protein LOC100679460 [Nasonia vitripennis];>Cluster-8535.7750;orf1 len=155 frame:1 start:394 end:858 gi|345489260|ref|XP_003426083.1| PREDICTED: uncharacterized protein LOC100679460 [Nasonia vitripennis]	2	2	2	11.2	29.574	2.9775e-15	55113000	4592800
>Cluster-8535.20064; len=98 start:1 end:293; minus strand;>Cluster-8535.21447; len=82 start:1 end:243; minus strand	2	2	2	16.3	10.961	8.225e-13	120490000	30121000
>Cluster-8535.9033;orf1 len=614 frame:3 start:423 end:2264 gi|345487200|ref|XP_001600947.2| PREDICTED: rab proteins geranylgeranyltransferase component A 1 isoform X1 [Nasonia vitripennis];>Cluster-8535.20098;orf1 len=610 frame:3 start:423 end:2252 gi|645014254|ref|XP_008203402.1| PREDICTED: rab proteins geranylgeranyltransferase component A 1 isoform X2 [Nasonia vitripennis]	2	1	1	1.5	68.54	0.0015196	0	0
>Cluster-8535.20153;orf1 len=157 frame:3 start:213 end:683 gi|766929883|ref|XP_011497053.1| PREDICTED: myosin-2 essential light chain isoform X2 [Ceratosolen solmsi marchali]	1	1	1	8.3	17.393	4.8364e-07	0	0
>Cluster-8535.20299;orf1 len=425 frame:3 start:228 end:1502 gi|270013391|gb|EFA09839.1| hypothetical protein TcasGA2_TC011986 [Tribolium castaneum]	1	1	1	3.3	45.874	4.2295e-07	0	0
>Cluster-8535.20318;orf1 len=291 frame:3 start:129 end:1001 gi|288856301|ref|NP_001165802.1| succinate dehydrogenase [ubiquinone] iron-sulfur subunit, mitochondrial [Nasonia vitripennis];>Cluster-7442.0; len=280 start:91 end:929; minus strand	2	3	3	12.8	33.451	4.3686e-06	78686000	4917900
>Cluster-8535.20333;orf1 len=2511 frame:2 start:2 end:7534 gi|645016844|ref|XP_008211654.1| PREDICTED: LOW QUALITY PROTEIN: muscle M-line assembly protein unc-89 [Nasonia vitripennis];>Cluster-8535.20332;orf1 len=2413 frame:2 start:134 end:7372 gi|645016844|ref|XP_008211654.1| PREDICTED: LOW QUALITY PROTEIN: muscle M-line assembly protein unc-89 [Nasonia vitripennis]	2	45	2	24.4	285.96	6.4558e-185	0	0
>Cluster-8535.20335;orf1 len=3549 frame:1 start:199 end:10845 gi|645016844|ref|XP_008211654.1| PREDICTED: LOW QUALITY PROTEIN: muscle M-line assembly protein unc-89 [Nasonia vitripennis];>Cluster-8535.20336;orf1 len=3537 frame:1 start:199 end:10809 gi|645016844|ref|XP_008211654.1| PREDICTED: LOW QUALITY PROTEIN: muscle M-line assembly protein unc-89 [Nasonia vitripennis]	2	50	7	19.4	400.67	4.1083e-196	2123000000	10356000
>Cluster-8535.20426;orf1 len=629 frame:3 start:594 end:2480 gi|229577285|ref|NP_001153339.1| alpha-glucosidase-like [Nasonia vitripennis];>Cluster-8535.14990;orf1 len=616 frame:-2 start:2192 end:345 gi|156543062|ref|XP_001604688.1| PREDICTED: maltase 2 [Nasonia vitripennis]	2	15	14	31.2	71.89	9.5214e-98	1243700000	35533000
>Cluster-8535.20494;orf1 len=121 frame:1 start:193 end:555 gi|240255403|ref|NP_001155298.1| NADH dehydrogenase [ubiquinone] iron-sulfur protein 5 [Nasonia vitripennis]	1	1	1	9.2	14.332	0.010686	22008000	2751000
>Cluster-8535.20546; len=2434 start:1489 end:8797; minus strand;>Cluster-8535.20541;orf1 len=2093 frame:-3 start:7742 end:1464 gi|644997270|ref|XP_008212283.1| PREDICTED: muscle M-line assembly protein unc-89 isoform X3 [Nasonia vitripennis];>Cluster-8535.21061;orf1 len=2024 frame:-3 start:9419 end:3348 gi|644997266|ref|XP_008212281.1| PREDICTED: titin isoform X1 [Nasonia vitripennis];>Cluster-85…	11	3	2	2.1	269.76	4.634e-08	229400000	1615500
>Cluster-8535.20759;orf2 len=380 frame:3 start:8004 end:9143 gi|766937636|ref|XP_011501280.1| PREDICTED: vanin-like protein 1 [Ceratosolen solmsi marchali];>Cluster-8535.20848;orf2 len=380 frame:3 start:8004 end:9143 gi|345479197|ref|XP_001603861.2| PREDICTED: vanin-like protein 2 [Nasonia vitripennis];>Cluster-8535.21141;orf2 len=380 frame:3 start:8004 end:9143 gi|766937636|ref|XP_011501280.1| P…	4	2	2	7.7	43.712	2.2373e-05	40101000	2358900
>Cluster-8535.21143;orf1 len=226 frame:2 start:335 end:1012 gi|156546789|ref|XP_001605784.1| PREDICTED: dual specificity protein phosphatase 3-like isoform X1 [Nasonia vitripennis];>Cluster-8535.20702; len=211 start:473 end:1105; minus strand	2	4	4	21.8	25.905	1.9887e-22	223930000	17226000
>Cluster-8535.20882;orf1 len=210 frame:-1 start:982 end:353 gi|645010086|ref|XP_008213409.1| PREDICTED: troponin I isoform X15 [Nasonia vitripennis];>Cluster-8535.9542;orf1 len=220 frame:-1 start:1223 end:564 gi|645010050|ref|XP_008213395.1| PREDICTED: troponin I isoform X4 [Nasonia vitripennis];>Cluster-8535.14914;orf1 len=214 frame:-1 start:1205 end:564 gi|645010071|ref|XP_008213402.1| PREDICTE…	3	7	3	29.7	25.081	5.6688e-72	3820800000	545830000
>Cluster-8535.20886;orf1 len=294 frame:2 start:29 end:910 gi|239050201|ref|NP_001155076.1| serine protease 50 precursor [Nasonia vitripennis]	1	2	2	8.5	31.588	7.9522e-05	74223000	7422300
>Cluster-8535.20983;orf1 len=718 frame:-1 start:2937 end:784 gi|766921753|ref|XP_011505408.1| PREDICTED: sphingomyelin phosphodiesterase-like [Ceratosolen solmsi marchali];>Cluster-8535.22289;orf1 len=709 frame:-1 start:3111 end:985 gi|766921753|ref|XP_011505408.1| PREDICTED: sphingomyelin phosphodiesterase-like [Ceratosolen solmsi marchali];>Cluster-8535.20984;orf2 len=699 frame:-1 start:3040 en…	3	1	1	1.8	82.564	0.0025286	26274000	821080
>Cluster-8535.20985;orf1 len=115 frame:-2 start:469 end:125 gi|288856289|ref|NP_001165798.1| NADH dehydrogenase [ubiquinone] 1 alpha subcomplex subunit 7 [Nasonia vitripennis]	1	1	1	8.8	12.942	0.010655	19157000	2128500
>Cluster-8535.21035;orf1 len=63 frame:-3 start:1527 end:1339 gi|645019128|ref|XP_008206401.1| PREDICTED: uncharacterized protein LOC103316135 [Nasonia vitripennis]	1	2	2	33.9	6.919	0.00084977	38016000	19008000
>Cluster-8535.21137;orf1 len=230 frame:-1 start:899 end:210 gi|156548610|ref|XP_001607910.1| PREDICTED: peroxiredoxin-6-like [Nasonia vitripennis]	1	5	5	31	25.934	1.1585e-25	163760000	13647000
>Cluster-8535.21212;orf1 len=771 frame:2 start:299 end:2611 gi|645023238|ref|XP_008202483.1| PREDICTED: endothelin-converting enzyme 1-like [Nasonia vitripennis];>Cluster-8535.17494;orf1 len=771 frame:2 start:299 end:2611 gi|645023238|ref|XP_008202483.1| PREDICTED: endothelin-converting enzyme 1-like [Nasonia vitripennis];>Cluster-8535.14048;orf1 len=768 frame:1 start:1297 end:3600 gi|345492449|r…	3	14	14	22.5	88.885	1.4129e-104	996810000	21670000
>Cluster-8535.21245;orf1 len=584 frame:-2 start:2739 end:988 gi|645021613|ref|XP_001601317.2| PREDICTED: uncharacterized protein LOC100116956 [Nasonia vitripennis]	1	10	10	26.4	65.725	3.6002e-60	552830000	19744000
>Cluster-8535.8236;orf1 len=2759 frame:3 start:330 end:8606 gi|345478852|ref|XP_001599724.2| PREDICTED: basement membrane-specific heparan sulfate proteoglycan core protein isoform X3 [Nasonia vitripennis];>Cluster-8535.21338;orf1 len=2745 frame:3 start:3 end:8237 gi|345478852|ref|XP_001599724.2| PREDICTED: basement membrane-specific heparan sulfate proteoglycan core protein isoform X3 [Nasonia v…	2	2	2	1	303.76	9.6923e-07	42455000	305430
>Cluster-8535.21413;orf1 len=263 frame:-2 start:1243 end:455 gi|645007082|ref|XP_001605658.3| PREDICTED: chymotrypsin-2 [Nasonia vitripennis];>Cluster-8535.11087;orf1 len=264 frame:-3 start:988 end:197 gi|345482616|ref|XP_001607866.2| PREDICTED: chymotrypsin-2 [Nasonia vitripennis];>Cluster-19818.0;orf1 len=260 frame:2 start:2 end:781 gi|156537666|ref|XP_001607862.1| PREDICTED: chymotrypsin-2 iso…	5	16	6	60.3	28.968	1.9229e-119	24782000000	1548900000
>Cluster-8535.21441;orf1 len=1092 frame:3 start:3 end:3278 gi|766941150|ref|XP_011503200.1| PREDICTED: LOW QUALITY PROTEIN: twitchin-like [Ceratosolen solmsi marchali]	1	6	1	7.7	122.83	2.5116e-17	32901000	620770
>Cluster-8535.21508;orf1 len=346 frame:1 start:238 end:1275 gi|156543358|ref|XP_001607969.1| PREDICTED: fructose-1,6-bisphosphatase 1 [Nasonia vitripennis]>gi|645016521|ref|XP_008211512.1| PREDICTED: fructose-1,6-bisphosphatase 1 [Nasonia vitripennis]>gi|645016523|ref|XP_008211513.1| PREDICTED: fructose-1,6-bisphosphatase 1 [Nasonia vitripennis]	1	1	1	3.5	37.579	0.0019205	26391000	1885000
>Cluster-8535.21545;orf1 len=586 frame:2 start:545 end:2302 gi|766922024|ref|XP_011505558.1| PREDICTED: moesin/ezrin/radixin homolog 1 isoform X3 [Ceratosolen solmsi marchali];>Cluster-8535.21546;orf1 len=576 frame:1 start:355 end:2082 gi|766922024|ref|XP_011505558.1| PREDICTED: moesin/ezrin/radixin homolog 1 isoform X3 [Ceratosolen solmsi marchali];>Cluster-8535.1111;orf1 len=623 frame:3 start:3…	4	8	8	14.5	69.381	1.1157e-31	272710000	8797200
>Cluster-8535.21553;orf1 len=233 frame:3 start:132 end:830 gi|156554577|ref|XP_001601920.1| PREDICTED: proteasome subunit beta type-6 [Nasonia vitripennis]	1	2	2	7.3	24.88	0.00018632	28227000	2352200
>Cluster-8535.21602;orf1 len=8396 frame:-2 start:26814 end:1627 gi|801372526|ref|XP_012062829.1| PREDICTED: microtubule-actin cross-linking factor 1 [Atta cephalotes];>Cluster-8535.21605;orf1 len=8389 frame:-2 start:26793 end:1627 gi|801372526|ref|XP_012062829.1| PREDICTED: microtubule-actin cross-linking factor 1 [Atta cephalotes];>Cluster-8535.21600;orf1 len=8356 frame:-2 start:26694 end:1627 g…	9	3	3	0.5	947.5	1.0788e-14	148460000	306110
>Cluster-8535.21643;orf1 len=296 frame:-1 start:1777 end:890 gi|156538681|ref|XP_001607764.1| PREDICTED: adenylate kinase [Nasonia vitripennis];>Cluster-8535.21642;orf1 len=258 frame:-1 start:1663 end:890 gi|156538681|ref|XP_001607764.1| PREDICTED: adenylate kinase [Nasonia vitripennis]	2	3	3	10.5	33.025	7.3123e-05	67986000	3090300
>Cluster-8535.21649;orf1 len=382 frame:-3 start:1146 end:1 gi|645015625|ref|XP_008206539.1| PREDICTED: troponin T, skeletal muscle [Nasonia vitripennis]	1	13	1	27	45.608	3.8047e-60	16234000000	1082300000
>Cluster-8535.21753;orf1 len=329 frame:3 start:126 end:1112 gi|197245384|ref|NP_001127792.1| glyoxylate reductase/hydroxypyruvate reductase-like [Nasonia vitripennis];>Cluster-8535.8510;orf1 len=294 frame:1 start:22 end:903 gi|197245384|ref|NP_001127792.1| glyoxylate reductase/hydroxypyruvate reductase-like [Nasonia vitripennis]	2	1	1	4.9	35.932	0.0052118	0	0
>Cluster-8535.21760;orf1 len=434 frame:2 start:2 end:1303 gi|644992648|ref|XP_008202956.1| PREDICTED: glycerol-3-phosphate dehydrogenase [NAD(+)], cytoplasmic isoform X3 [Nasonia vitripennis]	1	5	5	13.9	47.197	3.0095e-12	217930000	7783200
>Cluster-8535.21767;orf1 len=586 frame:2 start:242 end:1999 gi|239735550|ref|NP_001155148.1| carboxylesterase clade B, member 2 precursor [Nasonia vitripennis]	1	20	20	47	65.525	2.4334e-123	6766400000	218270000
>Cluster-8535.22146;orf1 len=114 frame:-3 start:1831 end:1490 gi|239787126|ref|NP_001155166.1| venom protein T precursor [Nasonia vitripennis]>gi|645009676|ref|XP_008213293.1| PREDICTED: venom protein T isoform X1 [Nasonia vitripennis]	1	3	3	33.6	13.205	2.9796e-103	12020000000	4006600000
>Cluster-8535.22194;orf1 len=943 frame:-2 start:4685 end:1857 gi|752879433|ref|XP_011257243.1| PREDICTED: sarcalumenin isoform X2 [Camponotus floridanus]>gi|307179443|gb|EFN67767.1| Sarcalumenin [Camponotus floridanus]	1	4	4	4.2	104.13	3.2973e-12	182210000	4924600
>Cluster-8535.22379;orf1 len=381 frame:2 start:506 end:1648 gi|645031032|ref|XP_008210034.1| PREDICTED: leucine-rich repeat-containing protein 15-like [Nasonia vitripennis]	1	6	6	22.1	42.202	6.3977e-24	479220000	29951000
>Cluster-8535.22439; len=404 start:2180 end:3392; minus strand;>Cluster-8535.16907;orf1 len=934 frame:-1 start:3179 end:378 gi|645009541|ref|XP_008210468.1| PREDICTED: uncharacterized protein LOC100680448 isoform X3 [Nasonia vitripennis];>Cluster-8535.16908;orf1 len=813 frame:-1 start:3343 end:905 gi|766924581|ref|XP_011494142.1| PREDICTED: uncharacterized protein LOC105359286 [Ceratosolen solmsi…	4	3	3	9.7	44.404	1.2181e-07	22596000	1129800
>Cluster-8535.22716; len=275 start:12 end:835; minus strand	1	2	2	10.2	30.523	4.3938e-09	106440000	8187700
>Cluster-8535.22721;orf2 len=1851 frame:1 start:223 end:5775 gi|345480945|ref|XP_003424252.1| PREDICTED: uncharacterized protein LOC100680511 [Nasonia vitripennis];>Cluster-8535.6608;orf1 len=1851 frame:1 start:223 end:5775 gi|345480945|ref|XP_003424252.1| PREDICTED: uncharacterized protein LOC100680511 [Nasonia vitripennis]	2	70	70	43.1	213.89	0	18431000000	184310000
>Cluster-8535.22880;orf1 len=513 frame:-3 start:1969 end:431 gi|766926682|ref|XP_011495298.1| PREDICTED: putative serine protease K12H4.7 [Ceratosolen solmsi marchali]	1	3	3	7.6	57.795	3.7382e-12	26927000	1121900
>Cluster-8535.22884;orf1 len=633 frame:3 start:3 end:1901 gi|769839120|ref|XP_011630722.1| PREDICTED: glutamate decarboxylase isoform X1 [Pogonomyrmex barbatus];>Cluster-8535.22883;orf1 len=552 frame:1 start:340 end:1995 gi|769839120|ref|XP_011630722.1| PREDICTED: glutamate decarboxylase isoform X1 [Pogonomyrmex barbatus]	2	2	2	3.2	70.979	0.002147	35430000	1362700
>Cluster-8535.23055;orf1 len=145 frame:2 start:2 end:436 gi|829084927|ref|XP_012648878.1| uncharacterized protein [Babesia microti strain RI]>gi|399217583|emb|CCF74470.1| unnamed protein product [Babesia microti strain RI];>Cluster-8535.30002;orf1 len=142 frame:1 start:1 end:426 gi|820984727|ref|XP_012372323.1| PREDICTED: ubiquitin-like [Octodon degus];>Cluster-8535.23054; len=109 start:1 end:325…	36	3	3	29.9	16.53	1.9603e-10	152380000	19047000
>Cluster-8535.23066;orf1 len=374 frame:3 start:1443 end:2564 gi|345491628|ref|XP_003426664.1| PREDICTED: hyaluronidase-like [Nasonia vitripennis]	1	14	14	44.5	43.082	7.2991e-88	5278700000	310510000
>Cluster-8535.23079;orf1 len=446 frame:2 start:449 end:1786 gi|766942152|ref|XP_011503730.1| PREDICTED: probable medium-chain specific acyl-CoA dehydrogenase, mitochondrial [Ceratosolen solmsi marchali]	1	4	4	12.4	48.914	5.8401e-13	108130000	3861700
>Cluster-8535.23145;orf1 len=227 frame:2 start:2 end:682 gi|229576957|ref|NP_001153410.1| aldo-keto reductase-like [Nasonia vitripennis]	1	1	1	3.5	26.07	0.0027724	39823000	3318600
>Cluster-8535.23281; len=86 start:267 end:525; minus strand;>Cluster-8535.23282; len=86 start:267 end:525; minus strand;>Cluster-8535.23283; len=86 start:267 end:525; minus strand;>Cluster-8535.23284; len=86 start:267 end:525; minus strand;>Cluster-8535.23286; len=86 start:267 end:525; minus strand;>Cluster-8535.23287; len=86 start:267 end:525; minus strand	6	1	1	16.5	9.6991	0.0079845	0	0
>Cluster-8535.23398;orf1 len=450 frame:-3 start:1351 end:2 gi|644993458|ref|XP_008213175.1| PREDICTED: filaggrin-like [Nasonia vitripennis]	1	16	16	50.7	50.593	0	31855000000	1676600000
>Cluster-8535.23445;orf1 len=412 frame:-1 start:2025 end:790 gi|345487624|ref|XP_001604164.2| PREDICTED: glutaminyl-peptide cyclotransferase-like isoform X1 [Nasonia vitripennis];>Cluster-8535.8387;orf1 len=399 frame:-1 start:2327 end:1131 gi|345487624|ref|XP_001604164.2| PREDICTED: glutaminyl-peptide cyclotransferase-like isoform X1 [Nasonia vitripennis]	2	4	4	12.2	47.23	1.5025e-20	122240000	6112200
>Cluster-8535.23464;orf1 len=296 frame:1 start:94 end:981 gi|156542825|ref|XP_001608075.1| PREDICTED: thioredoxin-like protein 1 isoform X1 [Nasonia vitripennis]>gi|645002144|ref|XP_008209849.1| PREDICTED: thioredoxin-like protein 1 isoform X1 [Nasonia vitripennis]>gi|645002146|ref|XP_008209850.1| PREDICTED: thioredoxin-like protein 1 isoform X1 [Nasonia vitripennis]>gi|645002148|ref|XP_008209851…	2	1	1	3.7	32.239	0.0025337	37753000	2904000
>Cluster-8535.23486;orf1 len=262 frame:-1 start:1155 end:370 gi|156552868|ref|XP_001600528.1| PREDICTED: dehydrogenase/reductase SDR family member 11-like isoform X2 [Nasonia vitripennis]	1	2	2	7.7	28.399	0.0012557	23078000	1538600
>Cluster-8535.2406;orf1 len=258 frame:-2 start:844 end:71 gi|645013114|ref|XP_008216608.1| PREDICTED: LOW QUALITY PROTEIN: esterase E4-like [Nasonia vitripennis]	1	6	5	26.8	30.312	8.4687e-59	185720000	11608000
>Cluster-8535.241;orf1 len=264 frame:1 start:1 end:792 gi|820999715|ref|XP_012354850.1| PREDICTED: rab GDP dissociation inhibitor beta isoform X3 [Nomascus leucogenys]>gi|119606836|gb|EAW86430.1| GDP dissociation inhibitor 2, isoform CRA_a [Homo sapiens]	1	1	1	5.7	29.917	0.010319	0	0
>Cluster-8535.24161;orf1 len=270 frame:-1 start:1303 end:494 gi|645028785|ref|XP_008212275.1| PREDICTED: proteasome subunit alpha type-4 isoform X1 [Nasonia vitripennis]	1	1	1	4.5	30.357	0.0097353	98813000	7058100
>Cluster-8535.24442;orf1 len=1790 frame:-1 start:7090 end:1721 gi|156549170|ref|XP_001607740.1| PREDICTED: laminin subunit beta-1 [Nasonia vitripennis]>gi|644993051|ref|XP_008203086.1| PREDICTED: laminin subunit beta-1 [Nasonia vitripennis]>gi|644993053|ref|XP_008203087.1| PREDICTED: laminin subunit beta-1 [Nasonia vitripennis]	1	19	19	15.3	199.28	1.4762e-109	1014400000	11527000
>Cluster-8535.24700;orf1 len=1655 frame:1 start:154 end:5118 gi|644994753|ref|XP_001604560.2| PREDICTED: laminin subunit gamma-1 [Nasonia vitripennis]	1	17	17	14.6	183.07	3.2983e-124	787920000	9380000
>Cluster-8535.24705;orf1 len=218 frame:-2 start:2466 end:1813 gi|156541342|ref|XP_001599037.1| PREDICTED: acidic endochitinase SP2-like [Nasonia vitripennis];>Cluster-8535.24706;orf1 len=218 frame:-2 start:2439 end:1786 gi|156541342|ref|XP_001599037.1| PREDICTED: acidic endochitinase SP2-like [Nasonia vitripennis]	2	10	9	70	23.849	3.6851e-191	6461300000	587390000
>Cluster-8535.24705;orf2 len=205 frame:-3 start:713 end:99 gi|156541342|ref|XP_001599037.1| PREDICTED: acidic endochitinase SP2-like [Nasonia vitripennis];>Cluster-8535.24706;orf2 len=205 frame:-3 start:713 end:99 gi|156541342|ref|XP_001599037.1| PREDICTED: acidic endochitinase SP2-like [Nasonia vitripennis]	2	4	3	28.9	22.639	5.811e-28	204630000	15740000
>Cluster-8535.24769;orf1 len=143 frame:-1 start:695 end:267 gi|156547893|ref|XP_001608053.1| PREDICTED: fatty acid-binding protein, muscle isoform X1 [Nasonia vitripennis]	1	3	3	30.3	16.091	1.5269e-34	227010000	28376000
>Cluster-8535.24976;orf1 len=125 frame:-2 start:1376 end:1002 gi|295293072|ref|NP_001171239.1| nabaecin-1 precursor [Nasonia vitripennis]>gi|291220451|gb|ADD84771.1| nabaecin-1 precursor [Nasonia vitripennis]	1	6	6	40.3	13.627	4.9945e-122	26635000000	3329400000
>Cluster-8535.24978;orf1 len=413 frame:-2 start:3221 end:1983 gi|169639235|gb|ACA60733.1| venom acid phosphatase [Pteromalus puparum]	1	22	22	54.1	47.197	6.4025e-213	28720000000	1248700000
>Cluster-8535.24980;orf1 len=501 frame:3 start:3 end:1505 gi|239050560|ref|NP_001155087.1| endonuclease-like venom protein precursor [Nasonia vitripennis]	1	22	22	58.4	57.783	0	57688000000	2622200000
>Cluster-8535.24983;orf1 len=968 frame:1 start:997 end:3900 gi|345480592|ref|XP_001602131.2| PREDICTED: aminopeptidase N-like [Nasonia vitripennis]	1	20	20	23.1	111.4	4.5271e-117	1865100000	35868000
>Cluster-8535.24988;orf1 len=1902 frame:-1 start:8578 end:2873 gi|345480945|ref|XP_003424252.1| PREDICTED: uncharacterized protein LOC100680511 [Nasonia vitripennis];>Cluster-8535.6063;orf1 len=87 frame:-2 start:261 end:1 gi|345480945|ref|XP_003424252.1| PREDICTED: uncharacterized protein LOC100680511 [Nasonia vitripennis]	2	90	90	48.7	215.29	0	90108000000	866420000
>Cluster-8535.24989; len=107 start:191 end:509; minus strand	1	2	2	41.1	11.403	4.0319e-55	124000000	41332000
>Cluster-8535.24993;orf1 len=510 frame:-3 start:4465 end:2936 gi|766919185|ref|XP_011502648.1| PREDICTED: uncharacterized protein LOC105366035 [Ceratosolen solmsi marchali]	1	15	15	39.9	56.783	3.1355e-164	2920400000	121680000
>Cluster-8535.24996;orf1 len=406 frame:-2 start:3871 end:2654 gi|345481865|ref|XP_003424474.1| PREDICTED: pancreatic lipase-related protein 2-like [Nasonia vitripennis];>Cluster-8535.24998;orf1 len=406 frame:-1 start:3870 end:2653 gi|644994640|ref|XP_008216259.1| PREDICTED: esterase FE4 isoform X1 [Nasonia vitripennis]	2	2	2	5.7	45.998	0.0001786	71022000	3945600
>Cluster-8535.24996;orf2 len=414 frame:-1 start:6413 end:5172 gi|345481865|ref|XP_003424474.1| PREDICTED: pancreatic lipase-related protein 2-like [Nasonia vitripennis]	1	7	6	17.9	46.591	3.0947e-42	1060900000	70725000
[truncated: 178 more rows]
