# Supplementary material for: Identification and Comparative Analysis of Venom Proteins in a Pupal Ectoparasitoid, Pachycrepoideus vindemmiae
Source: Front Physiol. 2020 Jan 24;11:9. doi: 10.3389/fphys.2020.00009 (PMC6993573; doi:10.3389/fphys.2020.00009)
Supplement: TABLE S3 — Primers used for qPCR analysis of 20 venom genes. [file Table_3.xls]

## Sheet: Sheet1
Supplementary Table 3. Primers used for qPCR analysis of 20 venom genes
Gene ID	Primer name	Forward primer (5'-3')	Reverse primer (5'-3')
—	28S rRNA	CCTCGTAAGAGTGTTCGTCG	GTCGCTCTTGCTAACTTCATCCG
Cluster-8535.24978	Vap	TCGCCATGCCTAAAGACAACATTG	CGCAGGAAACGAAGGTAACTACG
Cluster-8535.6027	Sp64	AGATACAATACCAGCGAGTTTCCC	GACTGTTGAAGTGGTTGAGAATGC
Cluster-8535.6175	Crvp	CGTGTCTCTGCGTGTGTGTTTAC	TTTATCGGGCTTCCAGGGCTTC
Cluster-8535.6176	Ktspi	CTGACCGAACGATCTTGAACCTG	CGGCACTATTGGGAGAGACATTC
Cluster-8535.6269	Ldlrrp	TGCTGCCGTTATCGTTGTTGTG	CGTCGCTCAGGAGGATGTCG
Cluster-8535.10302	Gg1	GATTGGGCATTGGTGGTGGTTTC	TAAGCGGCAGCAGGAGCATATTC
Cluster-8535.12135	Mrjp	TCTTACAACCTGCCTCTCTCACAC	GAACGATTAAACGCCCGAGTCTG
Cluster-8535.16090	Up2	ACAAGAGGTCCAGCAGCCAAG	AGCAGGAAGATGAGCAGGAAGAG
Cluster-8535.25024	Nl	GGGCACCAACTACAAGTTTCATCC	GTCGGCTGTACTGACGCAATG
Cluster-8535.25068	Xpa	TTGTCCTGGCTGTAAGCGTCTG	ACGATGATTTGCGAAACTCTGCTC
Cluster-8535.25073	C2l	CGGCTGCTCACTGCTTTATCAAC	GTCGCCATTACCATACGGATTCG
Cluster-8535.25243	Vpj	TGAATCACTCCTGCCTGAGATACG	TCGCCTCCAGTAGCCAATAATCC
Cluster-8535.25580	Vpu	AGTGAGATCGGAGCAACGGATAC	ACGGATGGTGACGGTTAAATTAGC
Cluster-8535.5294	Va3	CAGCACAGAGGTGGGCAAATG	ATAGCGGTCAAACTAAACGGTACG
Cluster-8535.5960	L3l	TCCGCTAAACCACCGACTTACG	GGTTATAGCCTCTGGGAGCCTTC
Cluster-8535.5971	Vm2	GGAACTGCGTCGTGGTCTAAAC	AGTAGCGGAGTATCGTGGAATGG
Cluster-8535.6002	Pssp	CCTCGCCTCGTTGCTTATTCTG	TCTCGTCTCCTTGGTAACTCGTAG
Cluster-8535.6043	Gbp	GCACTGCTGTACTCGGTTCTATG	TTAAATTCCGTTCCAGGTCCACAC
Cluster-8535.6242	Up1	AATCCACCAGTCGTAGGGTTTCC	GAAGGCAGATGTAGGGCAAAGTG
Cluster-8535.6260	G6pd	TGGTGAATGATGCGGGACTAAGG	GTGAGCGGGAGCGAGATGC
